# Supplementary material for: Identification of disulfidptosis-associated genes and characterization of immune cell infiltration in thyroid carcinoma
Source: publisher site journal article supplement (doi:10.18632/aging.205897), 2024-06-04
Supplement: Supplementary file [file aging-v16i11-205897-supplementary-material-SD1.pdf]

**SUPPLEMENTARY FIGURES**

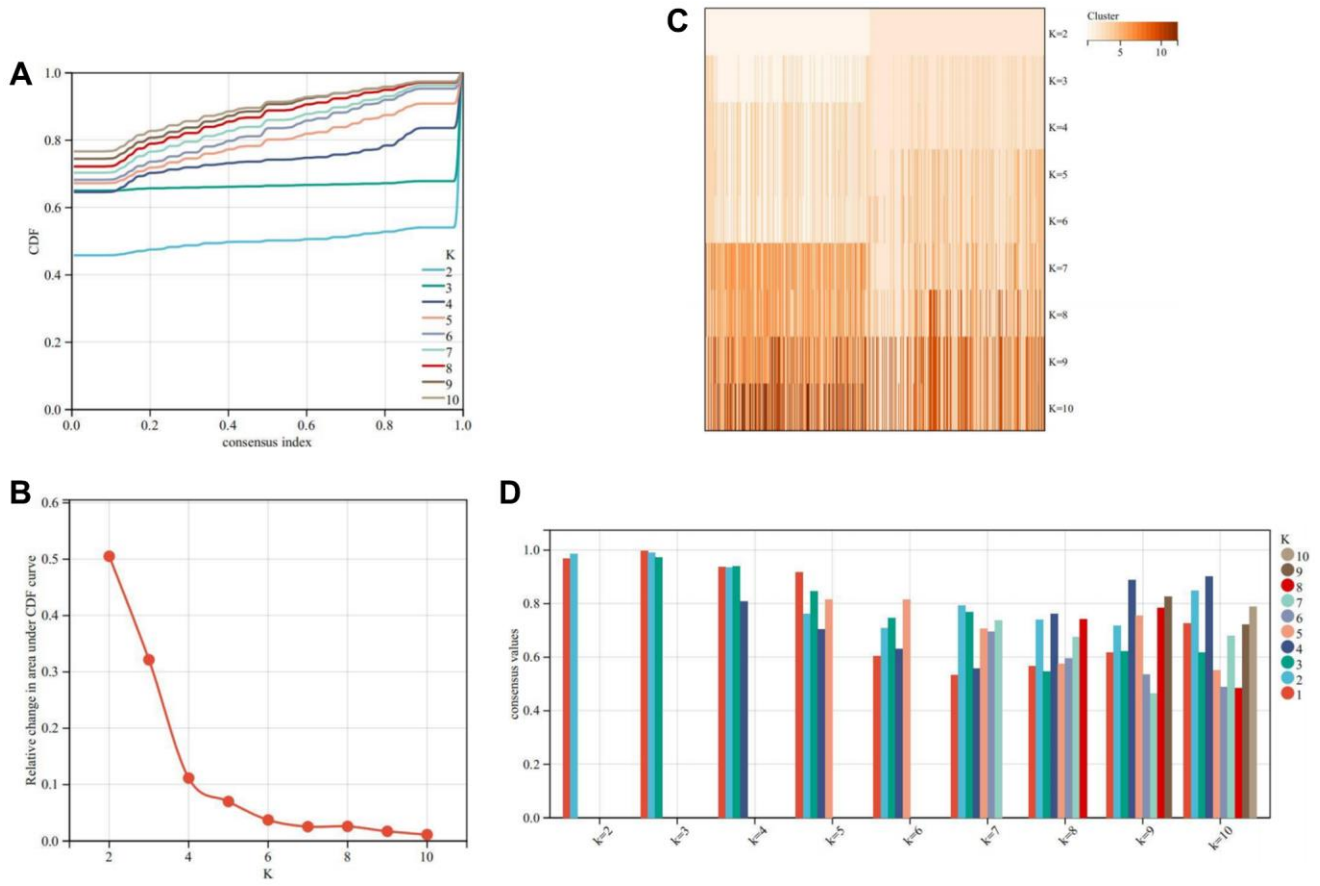

**Supplementary Figure 1 Consensus clustering analysis.** (A) Represents the CDF curve when  $k = 2-10$ . (B) Represents the delta area fraction of the CDF curve when  $k = 2-10$ . (C) Represents the tracking chart when  $k = 2-10$ . (D) Represents the consensus values when  $k = 2-10$ .

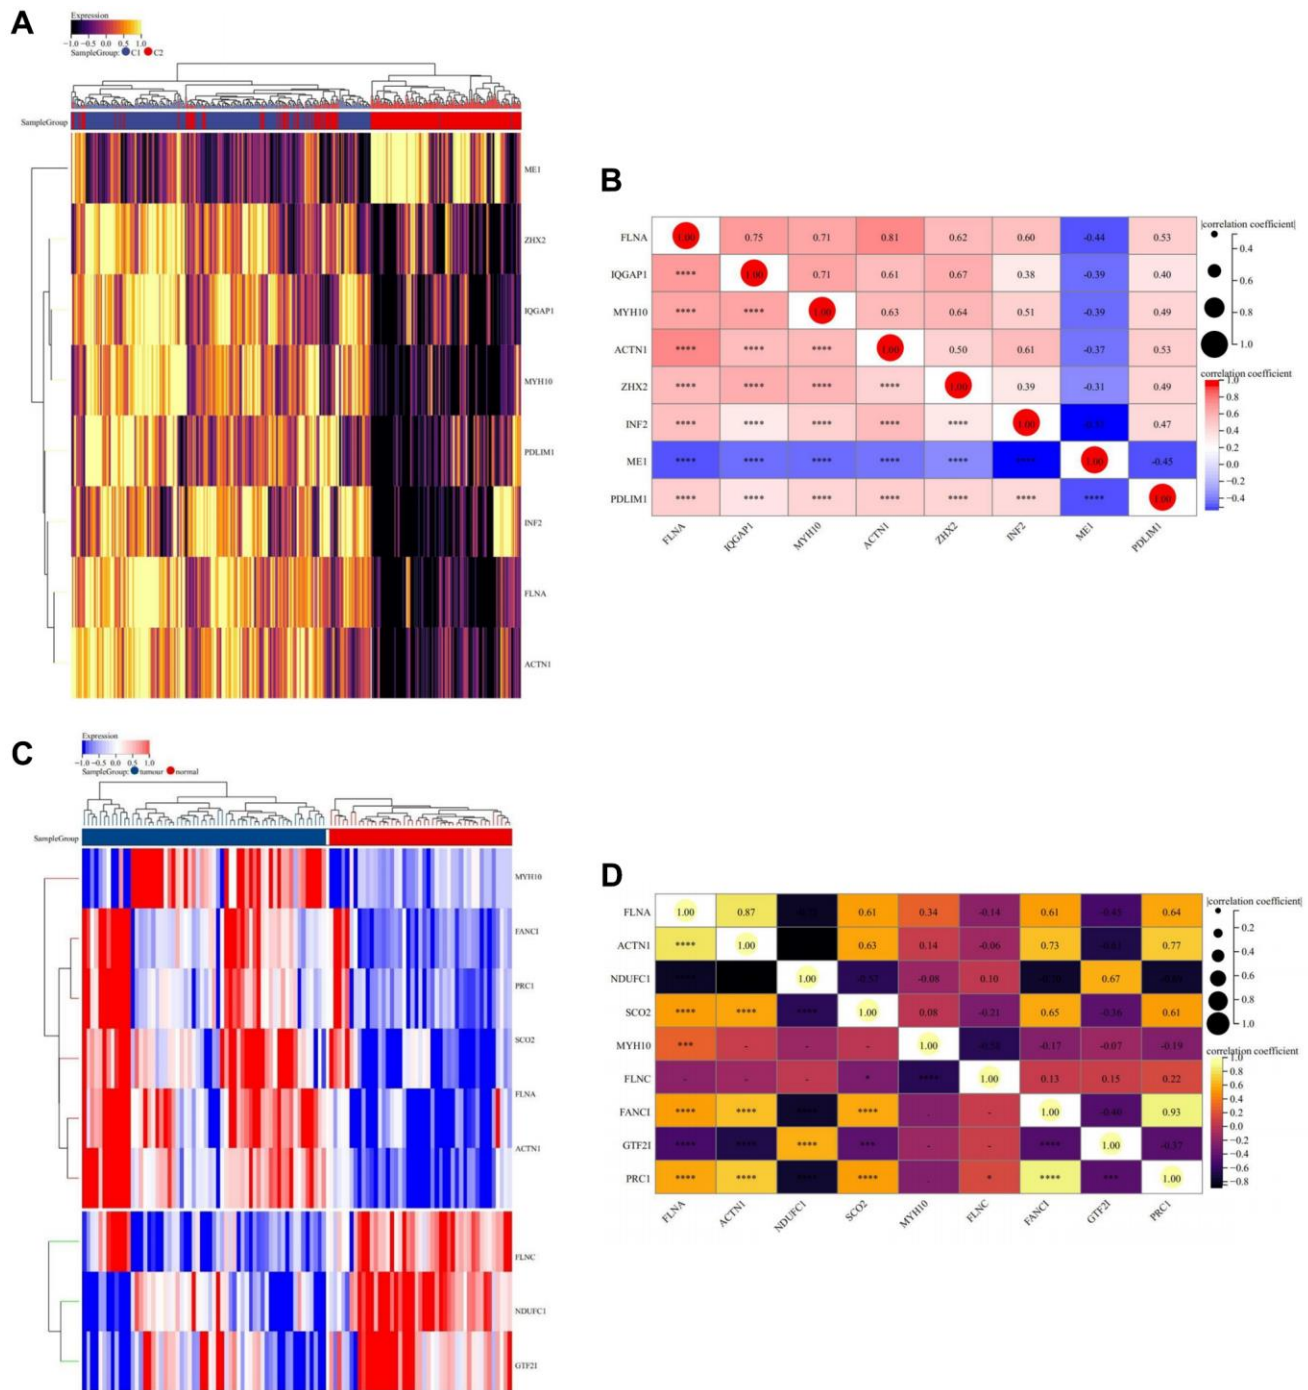

**Supplementary Figure 2. Differential expression and correlation analysis.** (A) Heatmap of DEDRGs in cluster C1 and C2 subtypes. (B) Correlation analysis of DEDRGs in TCGA-THCA. (C) Heatmap of DEDRGs in GSE33630. (D) Correlation analysis of DEDRGs in GSE33630. \* represents  $P < 0.05$ , \*\*\* represents  $P < 0.001$ , \*\*\*\* represents  $P < 0.0001$ , - represents no significant difference.

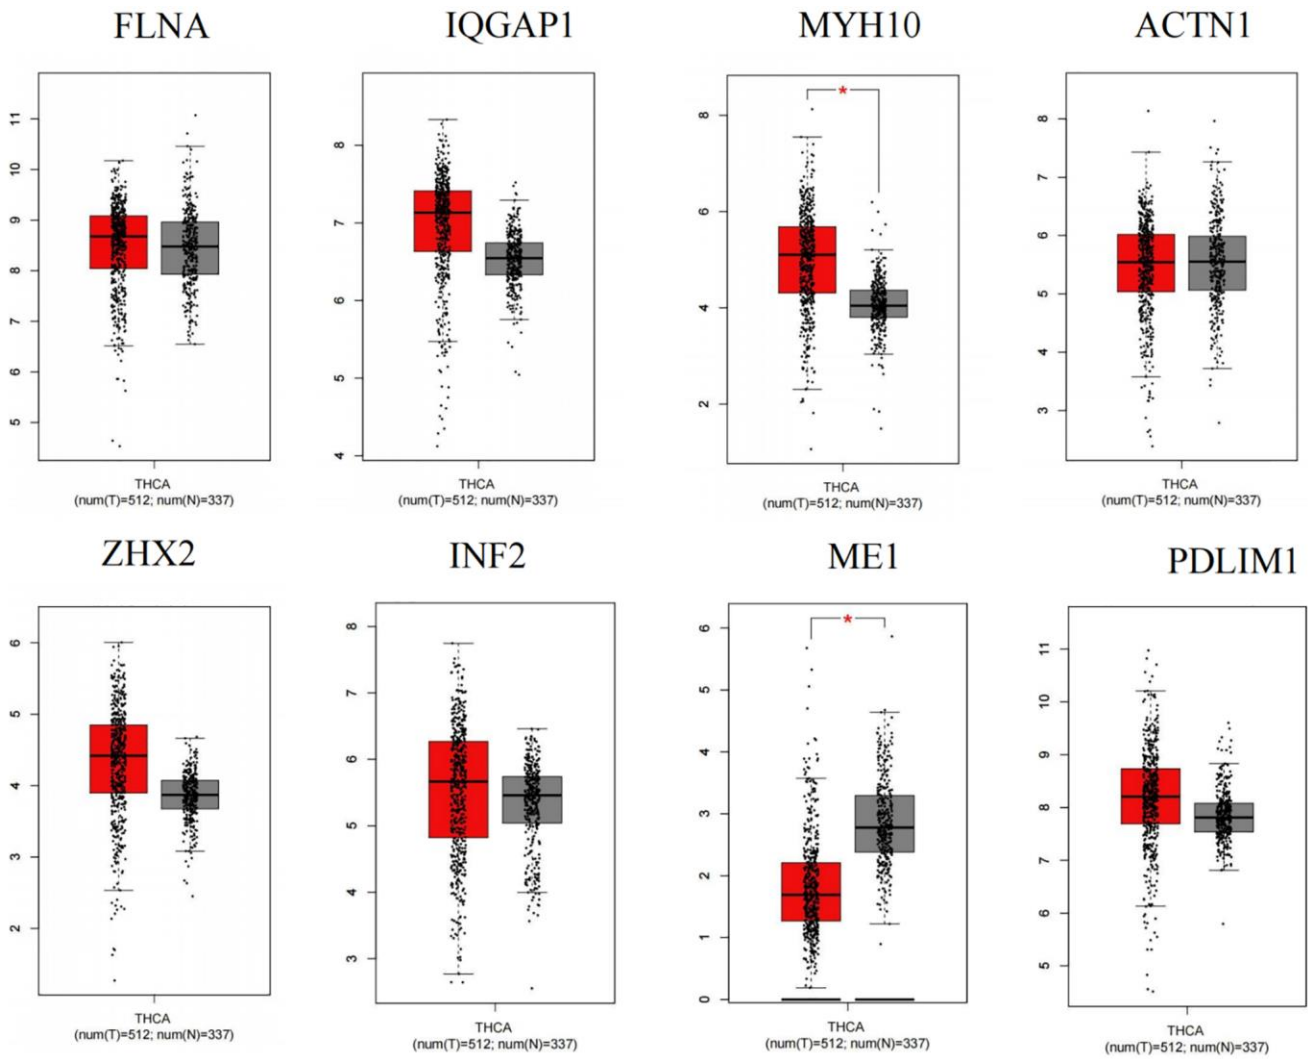

**Supplementary Figure 3. Expression difference of the DEDRGs in the GEPIA database.** Red represents tumor samples and gray represents normal tissues.

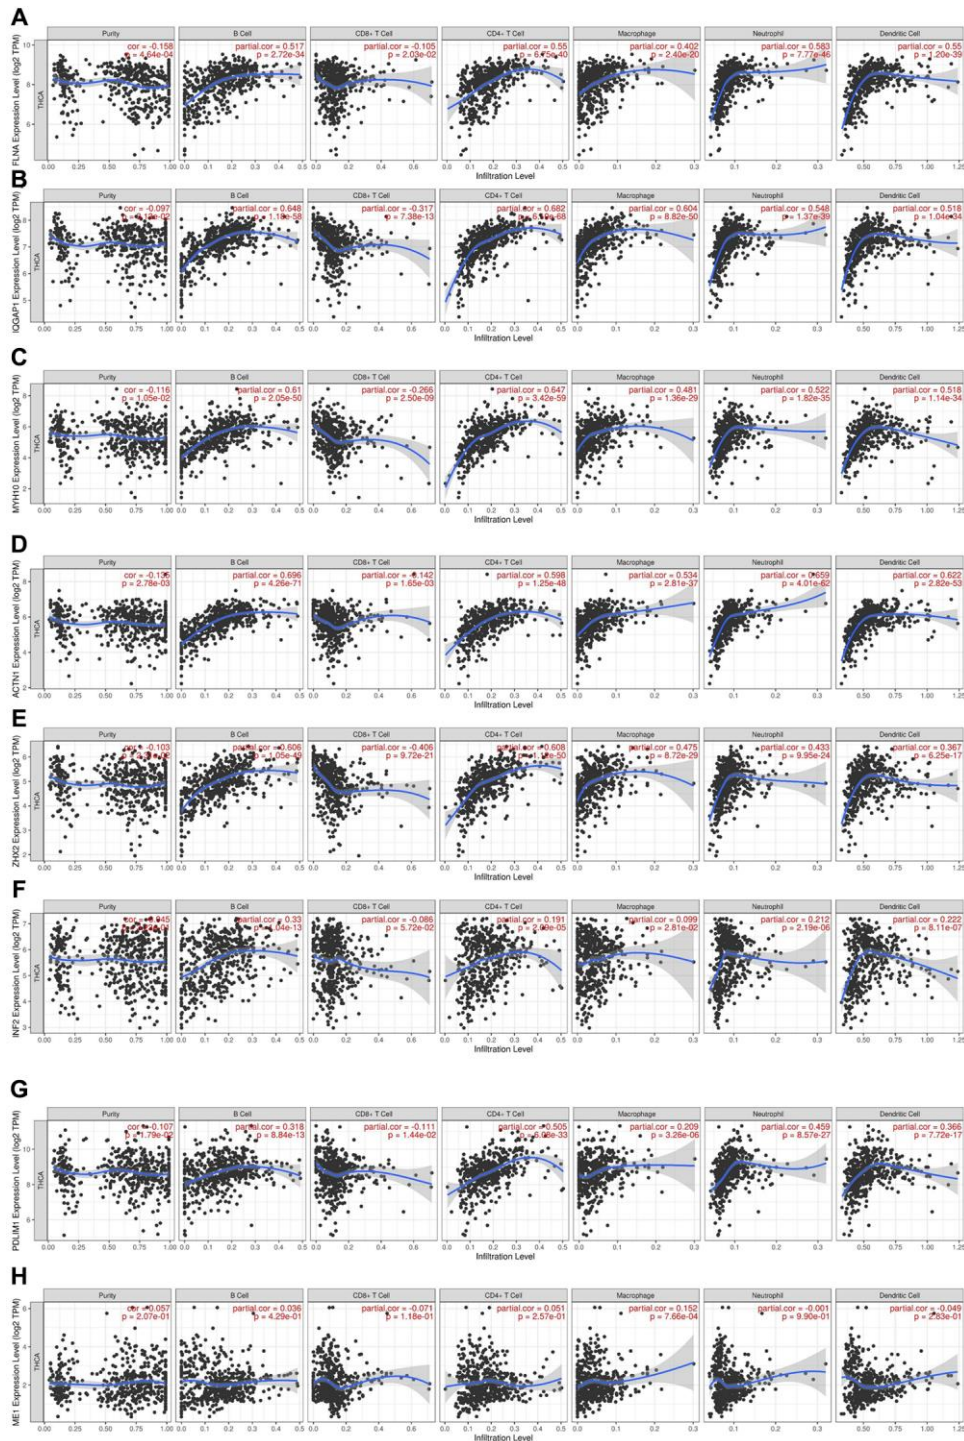

**Supplementary Figure 4. Relationship between the DEDRGs and immune cell infiltration in the TIMER database. (A) FLNA; (B) IQGAP1; (C) MYH10; (D) ACTN1; (E) ZHX2; (F) INF2; (G) PDLIM1; (H) ME1.**
