# Supplementary material for: Identification of disulfidptosis-associated genes and characterization of immune cell infiltration in thyroid carcinoma
Source: publisher site journal article supplement (doi:10.18632/aging.205897), 2024-06-04
Supplement: Supplementary file [file aging-v16i11-205897-supplementary-material-SD2.pdf]

## SUPPLEMENTARY TABLES

**Supplementary Table 1. Characteristic of the THCA patients in TCGA database.**

|                 | <b>TCGA</b> |
|-----------------|-------------|
| No. of patients | 507         |
| Age (%)         |             |
| ≤45             | 268 (52.9)  |
| >45             | 139 (47.1)  |
| Gender (%)      |             |
| Female          | 371 (73.2)  |
| Male            | 136 (26.8)  |
| Stage (%)       |             |
| I               | 285 (56.2)  |
| II              | 52 (10.2)   |
| III             | 113 (22.4)  |
| IV              | 55 (10.8)   |
| NA              | 2 (0.4)     |
| TNM (%)         |             |
| T               |             |
| T1              | 144 (28.4)  |
| T2              | 167 (33)    |
| T3              | 171 (33.7)  |
| T4              | 23 (4.5)    |
| TX              | 2 (0.4)     |
| N               |             |
| N0              | 231 (45.5)  |
| N1              | 226 (44.6)  |
| NX              | 50 (9.9)    |
| M               |             |
| M0              | 283 (55.9)  |
| M1              | 9 (1.79)    |
| MX              | 214 (43.2)  |
| NA              | 1 (0.01)    |
| Survival status |             |
| Median OS (day) | 944         |
| Ending (%)      |             |
| Survival        | 491 (96.8)  |
| Death           | 16 (3.2)    |

Abbreviations: T: primary tumor; N: regional lymph nodes; M: distant metastasis; NA not available.

**Supplementary Table 2. Disulfidptosis-related genes (DRGs) in the study.**

---

| <b>Gene names</b> |
|-------------------|
| AAAS              |
| ACTB              |
| ACTN1             |
| ACTN2             |
| ACTN3             |
| ACTN4             |
| ANP32E            |
| ARMC6             |
| ARNT              |
| ATG5              |
| ATXN10            |
| BOP1              |
| CAPZB             |
| CD2AP             |
| CHCHD3            |
| CHD4              |
| CNOT1             |
| DBN1              |
| DHX9              |
| DSTN              |
| EBLN2             |
| EPAS1             |
| FANCI             |
| FLNA              |
| FLNB              |
| FLNC              |
| GCN1L1            |
| GLUD1             |
| GTF2I             |
| GYS1              |
| HNRNPA3           |
| HNRNPH1           |
| HNRNPH2           |
| HNRNPH3           |
| HNRNPM            |
| HNRNPU            |
| INF2              |
| IPO4              |
| IPO7              |
| IQGAP1            |
| LGALS13           |
| LRPPRC            |
| ME1               |
| MRPS17            |
| MYH1              |
| MYH10             |
| MYH11             |
| MYH13             |
| MYH14             |
| MYH2              |
| MYH3              |
| MYH4              |
| MYH6              |
| MYH7              |

---

MYH7B  
MYH8  
MYH9  
MYL6  
MYL6B  
NCKAP1  
NDUFA10  
NDUFA11  
NDUFB10  
NDUFB11  
NDUFB6  
NDUFC1  
NDUFS1  
NDUFS2  
NIPBL  
NLN  
NSUN2  
NUBPL  
OXSM  
PCBP1  
PCBP2  
PCBP3  
PDLIM1  
PML  
PPIH  
PPM1F  
PRC1  
PRDX1  
RNH1  
RPA1  
RPN1  
RRP1  
RUFY1  
SAFB  
SAFB2  
SAMM50  
SART3  
SCO2  
SLC3A2  
SLC7A11  
SMPD4  
SPG20  
SQSTM1  
STRAP  
TARDBP  
TDP43  
TLN1  
TLN2  
TNKS1BP1  
TRIP6  
UBASH3B  
ZHX2

---

**Supplementary Table 3. Real-time polymerase chain reaction primers.**

| <b>Gene</b> | <b>Sequence (5'-3')</b>     |
|-------------|-----------------------------|
| PDLIM1-F    | CTCCAACCTACTAATTCCGACCTTCAC |
| PDLIM1-R    | ACGCACTCAACGGCTTATCACAC     |
| INF2-F      | CTCCAACCTACTAATTCCGACCTTCAC |
| INF2-R      | ACGCACTCAACGGCTTATCACAC     |
