# Supplementary material for: Identification of disulfidptosis-associated genes and characterization of immune cell infiltration in thyroid carcinoma
Source: Aging (Albany NY). 2024 Jun 4;16(11):9753–83. doi: 10.18632/aging.205897 (PMC11210228; doi:10.18632/aging.205897)
Supplement: Supplementary Table 4 [file aging-16-205897-s003.xlsx]

## Sheet: ZHX2
Supplementary Table 4. Information of Bayesian co-localization analysis.
snp	V.df1	z.df1	r.df1	lABF.df1	V.df2	z.df2	r.df2	lABF.df2	internal.sum.lABF	SNP.PP.H4
rs551847365	0.135778	3.12131	0.993241	2.33992	0.135778	3.12131	0.993241	2.33992	4.67983	0.224511
rs3107196	0.120799	3.03324	0.993982	2.01608	0.120799	3.03324	0.993982	2.01608	4.03217	0.117479
rs570732015	0.0530722	-3.09062	0.997347	1.79724	0.0530722	-3.09062	0.997347	1.79724	3.59448	0.0758357
rs11775312	0.112554	-2.95905	0.994391	1.76178	0.112554	-2.95905	0.994391	1.76178	3.52356	0.0706442
rs148861043	0.123667	2.92209	0.99384	1.69814	0.123667	2.92209	0.99384	1.69814	3.39629	0.0622014
rs189434217	0.128496	2.8697	0.993601	1.56541	0.128496	2.8697	0.993601	1.56541	3.13081	0.0476988
rs532624587	0.212758	2.66799	0.989449	1.24575	0.212758	2.66799	0.989449	1.24575	2.4915	0.0251686
rs113927648	0.11918	2.75322	0.994062	1.20438	0.11918	2.75322	0.994062	1.20438	2.40875	0.0231697
rs10102928	0.00328299	-3.333	0.999835	1.19725	0.00328299	-3.333	0.999835	1.19725	2.3945	0.0228418
rs13265963	0.00327824	-3.31187	0.999836	1.12634	0.00327824	-3.31187	0.999836	1.12634	2.25269	0.0198217
rs7160	0.00327824	-3.30191	0.999836	1.09343	0.00327824	-3.30191	0.999836	1.09343	2.18686	0.0185589
rs117273901	0.166496	2.65254	0.991725	1.09164	0.166496	2.65254	0.991725	1.09164	2.18328	0.0184926
rs13271447	0.00327886	-3.28436	0.999836	1.03574	0.00327886	-3.28436	0.999836	1.03574	2.07149	0.0165366
rs11368035	0.00328886	-3.26995	0.999835	0.990028	0.00328886	-3.26995	0.999835	0.990028	1.98006	0.0150917
rs200370560	18.7798	2.18786	0.515142	0.870972	18.7798	2.18786	0.515142	0.870972	1.74194	0.011894
rs202202495	1.50791	2.11833	0.929736	0.758254	1.50791	2.11833	0.929736	0.758254	1.51651	0.00949343
rs11780596	0.00329252	-3.18871	0.999835	0.728291	0.00329252	-3.18871	0.999835	0.728291	1.45658	0.00894124
rs534248500	28.1913	2.17109	0.414439	0.709162	28.1913	2.17109	0.414439	0.709162	1.41832	0.00860563
rs200411614	45.9296	2.41803	0.302855	0.704992	45.9296	2.41803	0.302855	0.704992	1.40998	0.00853416
rs546867515	7.90661	1.91241	0.716196	0.679936	7.90661	1.91241	0.716196	0.679936	1.35987	0.00811703
rs111616882	0.182383	-2.46669	0.990942	0.662653	0.182383	-2.46669	0.990942	0.662653	1.32531	0.00784125
rs562444243	9.63382	1.87748	0.674386	0.627562	9.63382	1.87748	0.674386	0.627562	1.25512	0.0073098
rs146470443	0.146858	-2.4852	0.992693	0.606059	0.146858	-2.4852	0.992693	0.606059	1.21212	0.00700209
rs578102761	4.22134	1.84848	0.825378	0.537543	4.22134	1.84848	0.825378	0.537543	1.07509	0.00610543
rs561331450	13.2881	1.77601	0.600248	0.488202	13.2881	1.77601	0.600248	0.488202	0.976403	0.0055317
rs142977992	0.183844	-2.38762	0.99087	0.476237	0.183844	-2.38762	0.99087	0.476237	0.952474	0.0054009
rs146439542	0.179956	-2.3914	0.991062	0.475139	0.179956	-2.3914	0.991062	0.475139	0.950278	0.00538905
rs541431529	24.4306	1.84102	0.449556	0.463338	24.4306	1.84102	0.449556	0.463338	0.926676	0.00526335
rs77052962	0.0969027	-2.47979	0.995167	0.393681	0.0969027	-2.47979	0.995167	0.393681	0.787363	0.00457888
rs141152964	0.0984133	-2.46092	0.995092	0.354761	0.0984133	-2.46092	0.995092	0.354761	0.709522	0.00423598
rs145645493	0.0984686	-2.45841	0.995089	0.348897	0.0984686	-2.45841	0.995089	0.348897	0.697794	0.00418659
rs117938932	0.0976319	-2.45973	0.995131	0.348007	0.0976319	-2.45973	0.995131	0.348007	0.696013	0.00417914
rs77801844	0.143834	2.37927	0.992843	0.340388	0.143834	2.37927	0.992843	0.340388	0.680776	0.00411594
rs140519639	0.191176	-2.31227	0.99051	0.319193	0.191176	-2.31227	0.99051	0.319193	0.638385	0.00394511
rs149936996	0.115135	2.41328	0.994263	0.314864	0.115135	2.41328	0.994263	0.314864	0.629729	0.00391111
rs148179191	0.0775678	-2.47153	0.996127	0.265487	0.0775678	-2.47153	0.996127	0.265487	0.530974	0.00354333
rs4870841	0.00341431	-3.03316	0.999829	0.262587	0.00341431	-3.03316	0.999829	0.262587	0.525174	0.00352284
rs141492579	0.105394	2.40483	0.994746	0.252068	0.105394	2.40483	0.994746	0.252068	0.504135	0.00344949
rs576276134	5.21707	1.60478	0.792726	0.233909	5.21707	1.60478	0.792726	0.233909	0.467818	0.00332646
rs147807420	0.152138	2.25963	0.992433	0.0916883	0.152138	2.25963	0.992433	0.0916883	0.183377	0.00250295
rs375672841	240.365	1.82895	0.076648	0.0883237	240.365	1.82895	0.076648	0.0883237	0.176647	0.00248616
rs138282928	0.155571	2.24974	0.992263	0.0801933	0.155571	2.24974	0.992263	0.0801933	0.160387	0.00244606
rs185178506	0.168076	2.21065	0.991647	0.03052	0.168076	2.21065	0.991647	0.03052	0.0610401	0.00221473
rs555370977	0.939612	1.8118	0.955026	0.0166511	0.939612	1.8118	0.955026	0.0166511	0.0333023	0.00215415
rs4871340	0.00385795	2.92259	0.999807	-0.00565444	0.00385795	2.92259	0.999807	-0.00565444	-0.0113089	0.00206016
rs118001371	0.107881	-2.289	0.994622	-0.00706303	0.107881	-2.289	0.994622	-0.00706303	-0.0141261	0.00205436
rs12674841	0.00332642	-2.92169	0.999833	-0.0822613	0.00332642	-2.92169	0.999833	-0.0822613	-0.164523	0.00176751
rs7824629	0.00332664	-2.90996	0.999833	-0.116425	0.00332664	-2.90996	0.999833	-0.116425	-0.232851	0.00165077
rs149920699	0.0538644	-2.38499	0.997308	-0.122246	0.0538644	-2.38499	0.997308	-0.122246	-0.244492	0.00163166
rs13271532	0.00333013	-2.89823	0.999833	-0.149974	0.00333013	-2.89823	0.999833	-0.149974	-0.299947	0.00154364
rs11427211	0.00332928	-2.89337	0.999833	-0.16418	0.00332928	-2.89337	0.999833	-0.16418	-0.328359	0.0015004
rs76274959	0.114865	-2.20062	0.994276	-0.17406	0.114865	-2.20062	0.994276	-0.17406	-0.348121	0.00147104
rs547469686	0.184971	2.08874	0.990815	-0.183705	0.184971	2.08874	0.990815	-0.183705	-0.36741	0.00144294
rs28637302	0.116749	-2.18729	0.994183	-0.195258	0.116749	-2.18729	0.994183	-0.195258	-0.390516	0.00140998
rs11544921	0.0584992	-2.33385	0.997077	-0.202053	0.0584992	-2.33385	0.997077	-0.202053	-0.404107	0.00139095
rs141745493	0.175926	2.08672	0.99126	-0.211747	0.175926	2.08672	0.99126	-0.211747	-0.423493	0.00136424
rs7013070	0.00388074	2.84803	0.999806	-0.217786	0.00388074	2.84803	0.999806	-0.217786	-0.435572	0.00134786
rs61752913	0.146209	2.12399	0.992726	-0.222427	0.146209	2.12399	0.992726	-0.222427	-0.444855	0.00133541
rs117401161	0.0208436	-2.53358	0.998956	-0.226407	0.0208436	-2.53358	0.998956	-0.226407	-0.452814	0.00132482
rs182540618	0.02389	-2.49583	0.998804	-0.253563	0.02389	-2.49583	0.998804	-0.253563	-0.507125	0.00125479
rs147448701	0.058814	-2.30223	0.997061	-0.272498	0.058814	-2.30223	0.997061	-0.272498	-0.544996	0.00120816
rs138270662	0.0579919	-2.30374	0.997102	-0.275945	0.0579919	-2.30374	0.997102	-0.275945	-0.55189	0.00119986
rs192940262	0.10415	-2.17546	0.994807	-0.276223	0.10415	-2.17546	0.994807	-0.276223	-0.552447	0.00119919
rs145042284	0.172941	2.03294	0.991407	-0.329729	0.172941	2.03294	0.991407	-0.329729	-0.659458	0.00107749
rs28588315	0.00466982	2.76478	0.999766	-0.359021	0.00466982	2.76478	0.999766	-0.359021	-0.718041	0.00101618
rs4871339	0.00466955	2.75327	0.999766	-0.390796	0.00466955	2.75327	0.999766	-0.390796	-0.781593	0.00095361
rs573592796	0.202157	-1.94273	0.98997	-0.432901	0.202157	-1.94273	0.98997	-0.432901	-0.865802	0.000876595
rs3107197	0.0863085	2.14124	0.995693	-0.441183	0.0863085	2.14124	0.995693	-0.441183	-0.882366	0.000862195
rs149371093	0.56267	1.6701	0.972573	-0.441762	0.56267	1.6701	0.972573	-0.441762	-0.883524	0.000861197
rs10094426	0.00467675	2.72655	0.999766	-0.463212	0.00467675	2.72655	0.999766	-0.463212	-0.926425	0.000825032
rs13255713	0.00346833	-2.77981	0.999826	-0.465811	0.00346833	-2.77981	0.999826	-0.465811	-0.931622	0.000820755
rs2385076	0.00346813	-2.77269	0.999826	-0.485602	0.00346813	-2.77269	0.999826	-0.485602	-0.971204	0.000788903
rs112949046	0.0793814	-2.12227	0.996037	-0.522334	0.0793814	-2.12227	0.996037	-0.522334	-1.04467	0.000733024
rs542071317	0.178304	-1.92013	0.991143	-0.536155	0.178304	-1.92013	0.991143	-0.536155	-1.07231	0.00071304
rs79175219	0.168392	1.93357	0.991631	-0.537911	0.168392	1.93357	0.991631	-0.537911	-1.07582	0.00071054
rs142973345	0.0232261	-2.37701	0.998837	-0.556714	0.0232261	-2.37701	0.998837	-0.556714	-1.11343	0.000684315
rs144192893	0.191536	1.88526	0.990492	-0.567593	0.191536	1.88526	0.990492	-0.567593	-1.13519	0.000669587
rs201110027	0.0943823	2.05583	0.995292	-0.575969	0.0943823	2.05583	0.995292	-0.575969	-1.15194	0.000658464
rs190475950	0.235117	1.81918	0.988354	-0.590943	0.235117	1.81918	0.988354	-0.590943	-1.18189	0.000639037
rs564352212	0.189122	1.85359	0.990611	-0.63231	0.189122	1.85359	0.990611	-0.63231	-1.26462	0.000588294
rs375157634	0.181404	-1.85974	0.99099	-0.640988	0.181404	-1.85974	0.99099	-0.640988	-1.28198	0.000578172
rs41442744	0.036864	-2.23572	0.998156	-0.653246	0.036864	-2.23572	0.998156	-0.653246	-1.30649	0.00056417
rs141694951	0.160696	-1.88045	0.992011	-0.660892	0.160696	-1.88045	0.992011	-0.660892	-1.32178	0.000555608
rs17310219	0.120814	1.95076	0.993981	-0.66518	0.120814	1.95076	0.993981	-0.66518	-1.33036	0.000550863
rs186022400	0.132727	-1.92549	0.993392	-0.668218	0.132727	-1.92549	0.993392	-0.668218	-1.33644	0.000547527
rs58533610	0.118863	-1.9451	0.994078	-0.684034	0.118863	-1.9451	0.994078	-0.684034	-1.36807	0.000530479
rs138302525	0.156161	-1.87204	0.992234	-0.690366	0.156161	-1.87204	0.992234	-0.690366	-1.38073	0.000523802
rs192109649	0.130465	1.91778	0.993504	-0.691277	0.130465	1.91778	0.993504	-0.691277	-1.38255	0.000522849
rs16897571	0.11655	-1.94133	0.994193	-0.700874	0.11655	-1.94133	0.994193	-0.700874	-1.40175	0.000512909
rs141477910	0.118551	-1.92749	0.994094	-0.719213	0.118551	-1.92749	0.994094	-0.719213	-1.43843	0.000494437
rs371105460	0.0539247	-2.11253	0.997305	-0.732744	0.0539247	-2.11253	0.997305	-0.732744	-1.46549	0.000481237
rs76542522	0.119234	-1.91789	0.99406	-0.734778	0.119234	-1.91789	0.99406	-0.734778	-1.46956	0.000479283
rs62525522	0.0547073	-2.10802	0.997266	-0.735129	0.0547073	-2.10802	0.997266	-0.735129	-1.47026	0.000478947
rs62525509	0.0547022	-2.10394	0.997266	-0.743749	0.0547022	-2.10394	0.997266	-0.743749	-1.4875	0.00047076
rs74373688	0.119765	-1.91062	0.994033	-0.746446	0.119765	-1.91062	0.994033	-0.746446	-1.49289	0.000468228
rs537598066	0.153811	1.84133	0.99235	-0.754261	0.153811	1.84133	0.99235	-0.754261	-1.50852	0.000460966
rs189126487	0.157403	1.83114	0.992173	-0.761676	0.157403	1.83114	0.992173	-0.761676	-1.52335	0.000454181
rs7820388	0.016633	2.35644	0.999167	-0.771187	0.016633	2.35644	0.999167	-0.771187	-1.54237	0.000445623
rs111748743	0.0165603	2.35429	0.999171	-0.778439	0.0165603	2.35429	0.999171	-0.778439	-1.55688	0.000439206
rs183855298	0.166147	1.80595	0.991742	-0.781004	0.166147	1.80595	0.991742	-0.781004	-1.56201	0.000436959
rs149852565	0.122405	-1.8854	0.993903	-0.783422	0.122405	-1.8854	0.993903	-0.783422	-1.56684	0.000434851
rs146822170	0.156389	1.8197	0.992223	-0.785516	0.156389	1.8197	0.992223	-0.785516	-1.57103	0.000433034
rs146362576	0.0464575	-2.12159	0.997677	-0.787108	0.0464575	-2.12159	0.997677	-0.787108	-1.57422	0.000431657
rs79859001	0.120084	1.88417	0.994018	-0.795035	0.120084	1.88417	0.994018	-0.795035	-1.59007	0.000424867
rs79419942	0.0975238	1.93324	0.995136	-0.803331	0.0975238	1.93324	0.995136	-0.803331	-1.60666	0.000417876
rs140428465	0.0465317	-2.11272	0.997673	-0.805071	0.0465317	-2.11272	0.997673	-0.805071	-1.61014	0.000416425
rs11784588	0.00336301	-2.65799	0.999831	-0.81236	0.00336301	-2.65799	0.999831	-0.81236	-1.62472	0.000410398
rs182220548	0.100294	-1.91869	0.994999	-0.817533	0.100294	-1.91869	0.994999	-0.817533	-1.63507	0.000406174
rs4871357	0.0810057	-1.96779	0.995957	-0.827055	0.0810057	-1.96779	0.995957	-0.827055	-1.65411	0.000398512
rs113639207	0.0371156	2.1539	0.998143	-0.829132	0.0371156	2.1539	0.998143	-0.829132	-1.65826	0.00039686
rs201544562	0.0381843	-2.1451	0.99809	-0.833971	0.0381843	-2.1451	0.99809	-0.833971	-1.66794	0.000393038
rs78762851	0.0897871	1.93661	0.99552	-0.837255	0.0897871	1.93661	0.99552	-0.837255	-1.67451	0.000390465
rs183316754	0.155977	-1.78879	0.992243	-0.842127	0.155977	-1.78879	0.992243	-0.842127	-1.68425	0.000386678
rs144597674	0.00813819	2.46318	0.999592	-0.870096	0.00813819	2.46318	0.999592	-0.870096	-1.74019	0.000365642
rs79761008	0.0165954	2.3075	0.999169	-0.886352	0.0165954	2.3075	0.999169	-0.886352	-1.7727	0.000353945
rs574589114	0.128482	-1.78924	0.993602	-0.935425	0.128482	-1.78924	0.993602	-0.935425	-1.87085	0.000320857
rs111310385	0.0166309	2.28378	0.999167	-0.939703	0.0166309	2.28378	0.999167	-0.939703	-1.87941	0.000318124
rs3107195	0.0887533	1.88301	0.995572	-0.944832	0.0887533	1.88301	0.995572	-0.944832	-1.88966	0.000314877
rs7839404	0.0273797	-2.16999	0.99863	-0.945145	0.0273797	-2.16999	0.99863	-0.945145	-1.89029	0.00031468
rs4870849	0.0847637	-1.88992	0.99577	-0.954412	0.0847637	-1.88992	0.99577	-0.954412	-1.90882	0.000308902
rs77699045	0.0397679	2.07134	0.998011	-0.969076	0.0397679	2.07134	0.998011	-0.969076	-1.93815	0.000299974
rs140037891	0.0169726	-2.26623	0.99915	-0.969473	0.0169726	-2.26623	0.99915	-0.969473	-1.93895	0.000299735
rs113700133	0.13736	1.74812	0.993163	-0.975171	0.13736	1.74812	0.993163	-0.975171	-1.95034	0.000296339
rs4871358	0.0825154	-1.88188	0.995882	-0.982693	0.0825154	-1.88188	0.995882	-0.982693	-1.96539	0.000291915
rs16897092	0.0165457	2.26296	0.999171	-0.989534	0.0165457	2.26296	0.999171	-0.989534	-1.97907	0.000287948
rs144291813	0.142475	-1.72899	0.99291	-0.990429	0.142475	-1.72899	0.99291	-0.990429	-1.98086	0.000287433
rs183409566	0.0662743	-1.92364	0.996689	-1.01125	0.0662743	-1.92364	0.996689	-1.01125	-2.0225	0.00027571
rs74796913	0.0572578	1.95678	0.997139	-1.01919	0.0572578	1.95678	0.997139	-1.01919	-2.03838	0.000271366
rs76561537	0.130643	-1.73666	0.993495	-1.0194	0.130643	-1.73666	0.993495	-1.0194	-2.0388	0.000271251
rs117335605	0.0349383	-2.06961	0.998252	-1.03675	0.0349383	-2.06961	0.998252	-1.03675	-2.0735	0.000262001
rs139311334	0.133996	-1.71223	0.993329	-1.04893	0.133996	-1.71223	0.993329	-1.04893	-2.09785	0.000255697
rs145421820	0.132061	-1.71131	0.993425	-1.05756	0.132061	-1.71131	0.993425	-1.05756	-2.11513	0.000251318
rs57219937	0.0816959	-1.84354	0.995922	-1.05872	0.0816959	-1.84354	0.995922	-1.05872	-2.11744	0.000250738
rs558792319	0.120735	-1.73446	0.993985	-1.06164	0.120735	-1.73446	0.993985	-1.06164	-2.12329	0.000249276
rs7820994	0.184946	-1.60038	0.990816	-1.0763	0.184946	-1.60038	0.990816	-1.0763	-2.15261	0.000242074
rs186226745	0.132097	-1.69838	0.993423	-1.07933	0.132097	-1.69838	0.993423	-1.07933	-2.15866	0.000240613
rs12235095	0.0058328	-2.44137	0.999708	-1.0897	0.0058328	-2.44137	0.999708	-1.0897	-2.17939	0.000235676
rs117504011	0.0492516	1.95378	0.997538	-1.0994	0.0492516	1.95378	0.997538	-1.0994	-2.1988	0.000231145
rs564073842	0.0862773	-1.80405	0.995695	-1.10364	0.0862773	-1.80405	0.995695	-1.10364	-2.20728	0.000229193
rs138949050	0.0632065	-1.8835	0.996842	-1.11076	0.0632065	-1.8835	0.996842	-1.11076	-2.22152	0.000225952
rs142712866	0.0588669	1.89103	0.997058	-1.13167	0.0588669	1.89103	0.997058	-1.13167	-2.26334	0.0002167
rs146402244	0.0830673	-1.79616	0.995854	-1.13641	0.0830673	-1.79616	0.995854	-1.13641	-2.27282	0.000214654
rs551985156	0.143187	-1.62934	0.992875	-1.15415	0.143187	-1.62934	0.992875	-1.15415	-2.3083	0.000207172
rs78900399	0.0275636	2.06882	0.99862	-1.15594	0.0275636	2.06882	0.99862	-1.15594	-2.31189	0.000206429
rs531223012	0.14098	-1.63211	0.992984	-1.15722	0.14098	-1.63211	0.992984	-1.15722	-2.31444	0.000205904
rs189152778	0.0472323	-1.93297	0.997638	-1.16043	0.0472323	-1.93297	0.997638	-1.16043	-2.32087	0.000204584
rs537498506	0.0882066	-1.76309	0.995599	-1.16552	0.0882066	-1.76309	0.995599	-1.16552	-2.33105	0.000202513
rs143261862	0.166948	1.56975	0.991702	-1.17405	0.166948	1.56975	0.991702	-1.17405	-2.3481	0.000199087
rs144674175	0.0489635	1.91047	0.997552	-1.18578	0.0489635	1.91047	0.997552	-1.18578	-2.37156	0.000194472
rs181502851	0.0898153	1.73984	0.995519	-1.1972	0.0898153	1.73984	0.995519	-1.1972	-2.3944	0.000190081
rs182866817	0.123209	-1.64075	0.993863	-1.20894	0.123209	-1.64075	0.993863	-1.20894	-2.41787	0.00018567
rs140750678	0.0883029	1.7374	0.995594	-1.20976	0.0883029	1.7374	0.995594	-1.20976	-2.41952	0.000185364
rs148927818	0.0814577	-1.7585	0.995934	-1.21268	0.0814577	-1.7585	0.995934	-1.21268	-2.42535	0.000184287
rs138469416	0.0815125	-1.75645	0.995931	-1.21594	0.0815125	-1.75645	0.995931	-1.21594	-2.43187	0.000183089
rs4302847	0.0145287	-2.18718	0.999272	-1.22272	0.0145287	-2.18718	0.999272	-1.22272	-2.44544	0.000180622
rs76797586	0.0199747	2.10978	0.999	-1.23048	0.0199747	2.10978	0.999	-1.23048	-2.46095	0.000177842
rs138439411	0.0579702	1.84079	0.997103	-1.2327	0.0579702	1.84079	0.997103	-1.2327	-2.46539	0.000177054
rs896682	0.0228487	2.07656	0.998856	-1.2331	0.0228487	2.07656	0.998856	-1.2331	-2.4662	0.000176912
rs7839063	0.016081	2.155	0.999195	-1.242	0.016081	2.155	0.999195	-1.242	-2.484	0.000173791
rs186834629	0.0675782	-1.79282	0.996625	-1.24394	0.0675782	-1.79282	0.996625	-1.24394	-2.48788	0.000173117
rs189920258	0.132707	-1.58788	0.993393	-1.25745	0.132707	-1.58788	0.993393	-1.25745	-2.51489	0.000168503
rs56171957	0.004717	2.40344	0.999764	-1.28752	0.004717	2.40344	0.999764	-1.28752	-2.57505	0.000158666
rs4870842	0.00472645	2.39985	0.999763	-1.29513	0.00472645	2.39985	0.999763	-1.29513	-2.59025	0.000156271
rs16897861	0.0034773	-2.45943	0.999826	-1.30366	0.0034773	-2.45943	0.999826	-1.30366	-2.60731	0.000153628
rs76559397	0.128114	1.56923	0.99362	-1.30392	0.128114	1.56923	0.99362	-1.30392	-2.60784	0.000153547
rs11781842	0.00337165	-2.46341	0.999831	-1.30927	0.00337165	-2.46341	0.999831	-1.30927	-2.61854	0.000151913
rs10956132	0.0827937	-1.67354	0.995868	-1.34987	0.0827937	-1.67354	0.995868	-1.34987	-2.69975	0.000140064
rs566929441	0.0988625	-1.61569	0.99507	-1.35738	0.0988625	-1.61569	0.99507	-1.35738	-2.71475	0.000137978
rs141050669	0.037334	-1.88893	0.998132	-1.36085	0.037334	-1.88893	0.998132	-1.36085	-2.7217	0.000137023
rs117650609	0.0700682	1.71459	0.996501	-1.36282	0.0700682	1.71459	0.996501	-1.36282	-2.72564	0.000136484
rs75044863	0.015161	-2.11144	0.999241	-1.36418	0.015161	-2.11144	0.999241	-1.36418	-2.72835	0.000136114
rs117026554	0.113376	1.5592	0.99435	-1.37935	0.113376	1.5592	0.99435	-1.37935	-2.75871	0.000132045
rs117311944	0.0351761	1.89442	0.99824	-1.38	0.0351761	1.89442	0.99824	-1.38	-2.75999	0.000131875
rs11786935	0.00347132	-2.42697	0.999826	-1.3838	0.00347132	-2.42697	0.999826	-1.3838	-2.7676	0.000130875
rs62525529	0.0704828	1.69634	0.99648	-1.39092	0.0704828	1.69634	0.99648	-1.39092	-2.78185	0.000129024
rs3857956	0.030721	-1.91885	0.998463	-1.4007	0.030721	-1.91885	0.998463	-1.4007	-2.8014	0.000126525
rs3912357	0.0750552	-1.66974	0.996252	-1.40454	0.0750552	-1.66974	0.996252	-1.40454	-2.80908	0.000125558
rs189755208	0.0752959	-1.66659	0.99624	-1.40819	0.0752959	-1.66659	0.99624	-1.40819	-2.81639	0.000124644
rs75523976	0.0636492	-1.71429	0.99682	-1.41073	0.0636492	-1.71429	0.99682	-1.41073	-2.82146	0.000124013
rs141559476	0.00968219	-2.18843	0.999515	-1.42222	0.00968219	-2.18843	0.999515	-1.42222	-2.84444	0.000121196
rs10107688	0.0836002	1.62535	0.995828	-1.42426	0.0836002	1.62535	0.995828	-1.42426	-2.84852	0.000120703
rs142305161	0.0536752	1.75064	0.997317	-1.43218	0.0536752	1.75064	0.997317	-1.43218	-2.86435	0.000118806
rs147989605	0.0380348	-1.84569	0.998097	-1.43222	0.0380348	-1.84569	0.998097	-1.43222	-2.86443	0.000118797
rs9792186	0.0226801	1.97013	0.998865	-1.45189	0.0226801	1.97013	0.998865	-1.45189	-2.90379	0.000114213
rs72720099	0.0310538	1.88362	0.998446	-1.46223	0.0310538	1.88362	0.998446	-1.46223	-2.92446	0.000111876
rs145883043	0.0319523	-1.8746	0.998401	-1.46499	0.0319523	-1.8746	0.998401	-1.46499	-2.92999	0.000111259
rs10108519	0.0886455	-1.57895	0.995577	-1.46943	0.0886455	-1.57895	0.995577	-1.46943	-2.93886	0.000110276
rs146101633	0.0235248	1.94957	0.998822	-1.47395	0.0235248	1.94957	0.998822	-1.47395	-2.9479	0.000109283
rs11782469	0.00358244	-2.3825	0.99982	-1.47499	0.00358244	-2.3825	0.99982	-1.47499	-2.94997	0.000109058
rs13259131	0.00342306	-2.38924	0.999828	-1.48164	0.00342306	-2.38924	0.999828	-1.48164	-2.96328	0.000107616
rs149224743	0.0510679	1.73629	0.997447	-1.48176	0.0510679	1.73629	0.997447	-1.48176	-2.96352	0.00010759
rs73711526	0.0173694	2.02122	0.99913	-1.48276	0.0173694	2.02122	0.99913	-1.48276	-2.96553	0.000107374
rs1562180	0.0087716	-2.17874	0.999561	-1.49261	0.0087716	-2.17874	0.999561	-1.49261	-2.98522	0.000105281
rs13280996	0.00358425	-2.37477	0.99982	-1.49312	0.00358425	-2.37477	0.99982	-1.49312	-2.98625	0.000105172
rs7006544	0.00358461	-2.37411	0.99982	-1.49463	0.00358461	-2.37411	0.99982	-1.49463	-2.98925	0.000104857
rs6470128	0.00358506	-2.37288	0.99982	-1.4975	0.00358506	-2.37288	0.99982	-1.4975	-2.99499	0.000104257
rs12677755	0.00358423	-2.3728	0.99982	-1.49779	0.00358423	-2.3728	0.99982	-1.49779	-2.99557	0.000104196
rs148833649	0.0233983	-1.93769	0.998829	-1.4997	0.0233983	-1.93769	0.998829	-1.4997	-2.99941	0.000103797
rs6985850	0.00872543	-2.17619	0.999563	-1.50079	0.00872543	-2.17619	0.999563	-1.50079	-3.00158	0.000103572
rs2385077	0.00358497	-2.37035	0.99982	-1.50349	0.00358497	-2.37035	0.99982	-1.50349	-3.00699	0.000103014
rs4871338	0.00358132	-2.36852	0.999821	-1.50834	0.00358132	-2.36852	0.999821	-1.50834	-3.01669	0.000102019
rs4541930	0.016144	2.02196	0.999192	-1.51769	0.016144	2.02196	0.999192	-1.51769	-3.03538	0.00010013
rs13256060	0.00346163	-2.36733	0.999827	-1.52815	0.00346163	-2.36733	0.999827	-1.52815	-3.0563	9.80565e-05
rs7159	0.0035825	-2.36006	0.99982	-1.52818	0.0035825	-2.36006	0.99982	-1.52818	-3.05636	9.80507e-05
rs12541920	0.00347813	-2.36124	0.999826	-1.54015	0.00347813	-2.36124	0.999826	-1.54015	-3.0803	9.57311e-05
rs148384742	0.0740226	1.58971	0.996304	-1.54132	0.0740226	1.58971	0.996304	-1.54132	-3.08263	9.55085e-05
rs11777331	0.00346204	-2.36086	0.999827	-1.54337	0.00346204	-2.36086	0.999827	-1.54337	-3.08674	9.51171e-05
rs10956124	0.0308874	-1.8399	0.998454	-1.54616	0.0308874	-1.8399	0.998454	-1.54616	-3.09232	9.45877e-05
rs112236572	0.023573	1.90831	0.99882	-1.55242	0.023573	1.90831	0.99882	-1.55242	-3.10484	9.34109e-05
rs13257191	0.00358999	-2.34573	0.99982	-1.56085	0.00358999	-2.34573	0.99982	-1.56085	-3.12169	9.18499e-05
rs4871301	0.0227666	-1.90897	0.99886	-1.56848	0.0227666	-1.90897	0.99886	-1.56848	-3.13695	9.04586e-05
rs529948766	0.058417	-1.6442	0.997081	-1.57047	0.058417	-1.6442	0.997081	-1.57047	-3.14095	9.00981e-05
rs3765210	0.00358555	-2.34058	0.99982	-1.57352	0.00358555	-2.34058	0.99982	-1.57352	-3.14704	8.95507e-05
rs184998336	0.022744	-1.90265	0.998861	-1.58101	0.022744	-1.90265	0.998861	-1.58101	-3.16202	8.82191e-05
rs7844363	0.0318144	-1.80961	0.998408	-1.58666	0.0318144	-1.80961	0.998408	-1.58666	-3.17332	8.72281e-05
rs35512152	0.00358727	-2.33463	0.99982	-1.58719	0.00358727	-2.33463	0.99982	-1.58719	-3.17439	8.71352e-05
rs76295824	0.036533	-1.76631	0.998172	-1.59529	0.036533	-1.76631	0.998172	-1.59529	-3.19058	8.57355e-05
rs77702061	0.0364722	-1.76466	0.998175	-1.59902	0.0364722	-1.76466	0.998175	-1.59902	-3.19805	8.50976e-05
rs1893892	0.0223006	1.89555	0.998884	-1.60426	0.0223006	1.89555	0.998884	-1.60426	-3.20853	8.42103e-05
rs74717158	0.0364791	-1.76079	0.998175	-1.60575	0.0364791	-1.76079	0.998175	-1.60575	-3.21149	8.39613e-05
rs78854424	0.0181269	1.94638	0.999092	-1.60984	0.0181269	1.94638	0.999092	-1.60984	-3.21968	8.32768e-05
rs74571604	0.036546	-1.75691	0.998172	-1.61165	0.036546	-1.75691	0.998172	-1.61165	-3.2233	8.29753e-05
rs4613998	0.0174449	1.95454	0.999126	-1.61303	0.0174449	1.95454	0.999126	-1.61303	-3.22606	8.27473e-05
rs73711528	0.0174396	1.95198	0.999127	-1.61817	0.0174396	1.95198	0.999127	-1.61817	-3.23634	8.19003e-05
rs80197632	0.0365922	-1.7498	0.998169	-1.62346	0.0365922	-1.7498	0.998169	-1.62346	-3.24693	8.10383e-05
rs79878430	0.0365922	-1.74972	0.998169	-1.62361	0.0365922	-1.74972	0.998169	-1.62361	-3.24722	8.10146e-05
rs117819315	0.0367669	-1.74489	0.998161	-1.62967	0.0367669	-1.74489	0.998161	-1.62967	-3.25933	8.00389e-05
rs73711525	0.0174451	1.94531	0.999126	-1.63101	0.0174451	1.94531	0.999126	-1.63101	-3.26203	7.98235e-05
rs57939471	0.013696	2.00086	0.999314	-1.642	0.013696	2.00086	0.999314	-1.642	-3.284	7.80889e-05
rs6651226	0.0174367	1.93907	0.999127	-1.64336	0.0174367	1.93907	0.999127	-1.64336	-3.28672	7.78765e-05
rs34254703	0.0174314	1.93558	0.999127	-1.65026	0.0174314	1.93558	0.999127	-1.65026	-3.30052	7.68095e-05
rs73711523	0.0174084	1.93532	0.999128	-1.65142	0.0174084	1.93532	0.999128	-1.65142	-3.30285	7.6631e-05
rs72497339	0.0174306	1.93375	0.999127	-1.65383	0.0174306	1.93375	0.999127	-1.65383	-3.30766	7.62633e-05
rs78226344	0.023604	1.8466	0.998818	-1.66748	0.023604	1.8466	0.998818	-1.66748	-3.33497	7.42084e-05
rs75178421	0.0301609	-1.77311	0.998491	-1.67846	0.0301609	-1.77311	0.998491	-1.67846	-3.35692	7.25973e-05
rs188510925	0.024828	1.82681	0.998757	-1.67866	0.024828	1.82681	0.998757	-1.67866	-3.35732	7.25679e-05
rs2891717	0.030625	-1.76767	0.998467	-1.68048	0.030625	-1.76767	0.998467	-1.68048	-3.36096	7.23047e-05
rs73711531	0.0174771	1.91793	0.999125	-1.68294	0.0174771	1.91793	0.999125	-1.68294	-3.36588	7.19497e-05
rs73711532	0.0174784	1.91695	0.999125	-1.68478	0.0174784	1.91695	0.999125	-1.68478	-3.36956	7.16854e-05
rs79427788	0.0282391	1.78472	0.998587	-1.69055	0.0282391	1.78472	0.998587	-1.69055	-3.38109	7.08635e-05
rs11774610	0.0305355	-1.75743	0.998472	-1.69996	0.0305355	-1.75743	0.998472	-1.69996	-3.39991	6.95423e-05
rs79535665	0.0282092	1.77964	0.998588	-1.70012	0.0282092	1.77964	0.998588	-1.70012	-3.40025	6.9519e-05
rs4871356	0.0305911	-1.75522	0.998469	-1.70294	0.0305911	-1.75522	0.998469	-1.70294	-3.40587	6.9129e-05
rs118022827	0.00995082	-2.04368	0.999502	-1.71471	0.00995082	-2.04368	0.999502	-1.71471	-3.42942	6.75205e-05
rs111813275	0.0281159	1.77228	0.998593	-1.71482	0.0281159	1.77228	0.998593	-1.71482	-3.42965	6.75048e-05
rs2084048	0.0182345	-1.88914	0.999087	-1.71657	0.0182345	-1.88914	0.999087	-1.71657	-3.43314	6.72699e-05
rs201574644	0.0549992	-1.5707	0.997251	-1.71812	0.0549992	-1.5707	0.997251	-1.71812	-3.43624	6.70611e-05
rs77634305	0.040545	-1.66342	0.997972	-1.71969	0.040545	-1.66342	0.997972	-1.71969	-3.43939	6.68507e-05
rs149038799	0.0243298	1.80539	0.998782	-1.7276	0.0243298	1.80539	0.998782	-1.7276	-3.4552	6.5802e-05
rs149424289	0.0514319	1.58341	0.997429	-1.73134	0.0514319	1.58341	0.997429	-1.73134	-3.46269	6.53108e-05
rs112711712	0.0440849	-1.62553	0.997795	-1.74035	0.0440849	-1.62553	0.997795	-1.74035	-3.4807	6.41448e-05
rs10090419	0.00518521	2.1749	0.99974	-1.76331	0.00518521	2.1749	0.99974	-1.76331	-3.52662	6.12663e-05
rs2385078	0.00518638	2.17268	0.99974	-1.76801	0.00518638	2.17268	0.99974	-1.76801	-3.53603	6.06925e-05
rs76840567	0.0280425	1.72246	0.998597	-1.80305	0.0280425	1.72246	0.998597	-1.80305	-3.60609	5.65857e-05
rs78986262	0.028006	1.70325	0.998598	-1.83656	0.028006	1.70325	0.998598	-1.83656	-3.67311	5.29176e-05
rs58047011	0.0129343	-1.91394	0.999352	-1.84056	0.0129343	-1.91394	0.999352	-1.84056	-3.68111	5.24958e-05
rs41333145	0.0129366	-1.91349	0.999352	-1.84131	0.0129366	-1.91349	0.999352	-1.84131	-3.68263	5.24165e-05
rs16897290	0.0129702	-1.89634	0.99935	-1.87267	0.0129702	-1.89634	0.99935	-1.87267	-3.74533	4.92307e-05
rs117285233	0.0179836	1.78816	0.9991	-1.90897	0.0179836	1.78816	0.9991	-1.90897	-3.81794	4.57825e-05
rs71510308	0.00334497	-2.19838	0.999832	-1.93088	0.00334497	-2.19838	0.999832	-1.93088	-3.86176	4.38199e-05
rs17346092	0.035196	-1.5716	0.998239	-1.93819	0.035196	-1.5716	0.998239	-1.93819	-3.87639	4.31836e-05
rs570824668	0.0279351	1.63718	0.998602	-1.94801	0.0279351	1.63718	0.998602	-1.94801	-3.89603	4.23436e-05
rs76741591	0.020939	1.71732	0.998952	-1.95723	0.020939	1.71732	0.998952	-1.95723	-3.91445	4.15707e-05
rs4146720	0.0141753	1.82688	0.99929	-1.95761	0.0141753	1.82688	0.99929	-1.95761	-3.91522	4.15386e-05
rs118121989	0.029808	1.60958	0.998508	-1.96048	0.029808	1.60958	0.998508	-1.96048	-3.92096	4.13011e-05
rs149545303	0.00425645	2.12794	0.999787	-1.96287	0.00425645	2.12794	0.999787	-1.96287	-3.92574	4.11041e-05
rs4401869	0.00333945	-2.17568	0.999833	-1.98135	0.00333945	-2.17568	0.999833	-1.98135	-3.96271	3.96122e-05
rs4146724	0.0033399	-2.17477	0.999833	-1.98326	0.0033399	-2.17477	0.999833	-1.98326	-3.96652	3.94614e-05
rs35656640	0.00334013	-2.17256	0.999833	-1.98802	0.00334013	-2.17256	0.999833	-1.98802	-3.97603	3.90879e-05
rs13265710	0.00334031	-2.17228	0.999833	-1.9886	0.00334031	-2.17228	0.999833	-1.9886	-3.9772	3.90422e-05
rs6984376	0.0056435	2.0476	0.999717	-1.98972	0.0056435	2.0476	0.999717	-1.98972	-3.97944	3.89551e-05
rs34696332	0.00334092	-2.1698	0.999833	-1.9939	0.00334092	-2.1698	0.999833	-1.9939	-3.9878	3.86307e-05
rs7844343	0.00683602	-1.9958	0.999658	-1.99871	0.00683602	-1.9958	0.999658	-1.99871	-3.99742	3.8261e-05
rs16897288	0.0129418	-1.81063	0.999352	-2.03253	0.0129418	-1.81063	0.999352	-2.03253	-4.06505	3.57587e-05
rs75168398	0.0246917	-1.62282	0.998764	-2.03281	0.0246917	-1.62282	0.998764	-2.03281	-4.06561	3.57387e-05
rs6984928	0.0121626	1.82205	0.999391	-2.04276	0.0121626	1.82205	0.999391	-2.04276	-4.08553	3.5034e-05
rs141998154	0.0277326	1.57807	0.998612	-2.04652	0.0277326	1.57807	0.998612	-2.04652	-4.09305	3.47715e-05
rs1955051	0.00422884	2.08922	0.999788	-2.04775	0.00422884	2.08922	0.999788	-2.04775	-4.09549	3.46867e-05
rs149884366	0.00335131	-2.14331	0.999832	-2.04948	0.00335131	-2.14331	0.999832	-2.04948	-4.09896	3.45667e-05
rs35828064	0.0112804	1.83353	0.999435	-2.05935	0.0112804	1.83353	0.999435	-2.05935	-4.11871	3.38906e-05
rs7461336	0.0051961	-2.03231	0.99974	-2.06213	0.0051961	-2.03231	0.99974	-2.06213	-4.12427	3.37027e-05
rs113664023	0.0161689	-1.73104	0.99919	-2.06238	0.0161689	-1.73104	0.99919	-2.06238	-4.12477	3.36859e-05
rs7006331	0.00333998	-2.13565	0.999833	-2.06754	0.00333998	-2.13565	0.999833	-2.06754	-4.13507	3.33406e-05
rs4871260	0.00333973	-2.13459	0.999833	-2.06984	0.00333973	-2.13459	0.999833	-2.06984	-4.13968	3.31874e-05
rs4871261	0.00333967	-2.13411	0.999833	-2.07088	0.00333967	-2.13411	0.999833	-2.07088	-4.14176	3.31184e-05
rs11783206	0.00333958	-2.13355	0.999833	-2.07208	0.00333958	-2.13355	0.999833	-2.07208	-4.14417	3.30387e-05
rs17369447	0.0206563	-1.6496	0.998966	-2.07789	0.0206563	-1.6496	0.998966	-2.07789	-4.15578	3.26571e-05
rs112171380	0.00522884	2.01584	0.999738	-2.09232	0.00522884	2.01584	0.999738	-2.09232	-4.18464	3.17282e-05
rs3834874	0.00794514	-1.90741	0.999602	-2.0961	0.00794514	-1.90741	0.999602	-2.0961	-4.1922	3.14894e-05
rs150415177	0.0255335	1.57199	0.998722	-2.0972	0.0255335	1.57199	0.998722	-2.0972	-4.19441	3.14198e-05
rs74987997	0.0257696	1.56851	0.99871	-2.09809	0.0257696	1.56851	0.99871	-2.09809	-4.19618	3.13643e-05
rs13250325	0.0121687	1.79094	0.99939	-2.09868	0.0121687	1.79094	0.99939	-2.09868	-4.19736	3.13272e-05
rs6981336	0.00360341	-2.10204	0.999819	-2.10083	0.00360341	-2.10204	0.999819	-2.10083	-4.20166	3.11929e-05
rs5894632	0.0123844	-1.78441	0.99938	-2.10159	0.0123844	-1.78441	0.99938	-2.10159	-4.20317	3.11457e-05
rs13252702	0.0121621	1.78812	0.999391	-2.10398	0.0121621	1.78812	0.999391	-2.10398	-4.20797	3.09967e-05
rs11506126	0.0140252	1.74696	0.999298	-2.10562	0.0140252	1.74696	0.999298	-2.10562	-4.21125	3.08952e-05
rs4372007	0.0033384	-2.11679	0.999833	-2.10787	0.0033384	-2.11679	0.999833	-2.10787	-4.21574	3.07568e-05
rs7000247	0.012135	1.78631	0.999392	-2.10834	0.012135	1.78631	0.999392	-2.10834	-4.21668	3.07278e-05
rs7017303	0.0124091	-1.77965	0.999378	-2.10907	0.0124091	-1.77965	0.999378	-2.10907	-4.21813	3.06833e-05
rs35350360	0.00360263	-2.09788	0.999819	-2.10966	0.00360263	-2.09788	0.999819	-2.10966	-4.21932	3.06468e-05
rs370390225	0.0228125	1.59727	0.998858	-2.11331	0.0228125	1.59727	0.998858	-2.11331	-4.22661	3.04241e-05
rs6470145	0.0145116	1.73003	0.999273	-2.11804	0.0145116	1.73003	0.999273	-2.11804	-4.23609	3.01372e-05
rs72711811	0.0248447	-1.56447	0.998756	-2.1226	0.0248447	-1.56447	0.998756	-2.1226	-4.2452	2.98638e-05
rs4870794	0.00333757	-2.10951	0.999833	-2.12338	0.00333757	-2.10951	0.999833	-2.12338	-4.24676	2.98173e-05
rs16897904	0.0085448	-1.86901	0.999572	-2.13226	0.0085448	-1.86901	0.999572	-2.13226	-4.26452	2.92925e-05
rs6470096	0.0123044	-1.76888	0.999384	-2.13239	0.0123044	-1.76888	0.999384	-2.13239	-4.26478	2.92847e-05
rs77681965	0.00853937	-1.86744	0.999572	-2.13551	0.00853937	-1.86744	0.999572	-2.13551	-4.27101	2.91028e-05
rs34811381	0.00328383	-2.10731	0.999835	-2.13612	0.00328383	-2.10731	0.999835	-2.13612	-4.27224	2.90672e-05
rs72720093	0.00852415	-1.86687	0.999573	-2.13747	0.00852415	-1.86687	0.999573	-2.13747	-4.27494	2.89887e-05
rs4242336	0.0123964	-1.75867	0.999379	-2.14666	0.0123964	-1.75867	0.999379	-2.14666	-4.29333	2.84605e-05
rs2187488	0.00328549	-2.09832	0.999835	-2.15478	0.00328549	-2.09832	0.999835	-2.15478	-4.30955	2.80025e-05
rs6996401	0.00328378	-2.09082	0.999835	-2.17074	0.00328378	-2.09082	0.999835	-2.17074	-4.34148	2.71225e-05
rs1464609	0.0130823	-1.72671	0.999345	-2.17547	0.0130823	-1.72671	0.999345	-2.17547	-4.35093	2.68674e-05
rs2023122	0.00328475	-2.0847	0.999835	-2.18336	0.00328475	-2.0847	0.999835	-2.18336	-4.36673	2.64464e-05
rs6470135	0.00383638	-2.04668	0.999808	-2.18436	0.00383638	-2.04668	0.999808	-2.18436	-4.36871	2.63939e-05
rs181012931	0.0141294	1.69153	0.999292	-2.19717	0.0141294	1.69153	0.999292	-2.19717	-4.39433	2.57263e-05
rs74422188	0.00334032	-2.06198	0.999833	-2.22209	0.00334032	-2.06198	0.999833	-2.22209	-4.44419	2.44752e-05
rs13277143	0.00335242	-2.06086	0.999832	-2.22259	0.00335242	-2.06086	0.999832	-2.22259	-4.44518	2.44509e-05
rs111825225	0.0185257	1.59197	0.999072	-2.22544	0.0185257	1.59197	0.999072	-2.22544	-4.45089	2.43117e-05
rs12542215	0.00964903	-1.77934	0.999517	-2.23511	0.00964903	-1.77934	0.999517	-2.23511	-4.47022	2.38463e-05
rs2385159	0.00340615	-2.04764	0.999829	-2.24179	0.00340615	-2.04764	0.999829	-2.24179	-4.48358	2.35297e-05
rs28693376	0.00334431	-2.04937	0.999832	-2.24741	0.00334431	-2.04937	0.999832	-2.24741	-4.49482	2.32667e-05
rs7821472	0.0133181	1.67915	0.999333	-2.2475	0.0133181	1.67915	0.999333	-2.2475	-4.49499	2.32627e-05
rs72537246	0.00577966	-1.91022	0.99971	-2.24959	0.00577966	-1.91022	0.99971	-2.24959	-4.49917	2.31657e-05
rs13252935	0.00603196	1.88822	0.999698	-2.27003	0.00603196	1.88822	0.999698	-2.27003	-4.54005	2.22378e-05
rs5011597	0.0042212	1.9803	0.999788	-2.27022	0.0042212	1.9803	0.999788	-2.27022	-4.54044	2.22293e-05
rs1059588	0.0084737	-1.78641	0.999575	-2.28734	0.0084737	-1.78641	0.999575	-2.28734	-4.57467	2.14812e-05
rs12680465	0.0083657	-1.78985	0.999581	-2.2876	0.0083657	-1.78985	0.999581	-2.2876	-4.57519	2.147e-05
rs13271600	0.00602246	1.8736	0.999698	-2.2983	0.00602246	1.8736	0.999698	-2.2983	-4.5966	2.10151e-05
rs34712991	0.00602244	1.87274	0.999698	-2.29992	0.00602244	1.87274	0.999698	-2.29992	-4.59983	2.09474e-05
rs13271524	0.00602052	1.87037	0.999698	-2.30451	0.00602052	1.87037	0.999698	-2.30451	-4.60901	2.0756e-05
rs4567045	0.00488383	-1.92215	0.999755	-2.31085	0.00488383	-1.92215	0.999755	-2.31085	-4.6217	2.04943e-05
rs58271982	0.00420044	1.95435	0.99979	-2.32373	0.00420044	1.95435	0.99979	-2.32373	-4.64747	1.9973e-05
rs7015548	0.00690935	-1.81121	0.999654	-2.34463	0.00690935	-1.81121	0.999654	-2.34463	-4.68926	1.91554e-05
rs7812931	0.0121767	1.63979	0.99939	-2.35746	0.0121767	1.63979	0.99939	-2.35746	-4.71493	1.867e-05
rs112343679	0.0105062	1.68347	0.999474	-2.35855	0.0105062	1.68347	0.999474	-2.35855	-4.71709	1.86297e-05
rs11987554	0.00416075	-1.93472	0.999792	-2.36664	0.00416075	-1.93472	0.999792	-2.36664	-4.73328	1.83306e-05
rs72720077	0.00849477	-1.74052	0.999574	-2.36698	0.00849477	-1.74052	0.999574	-2.36698	-4.73397	1.83179e-05
rs12549085	0.00538116	-1.86649	0.99973	-2.36782	0.00538116	-1.86649	0.99973	-2.36782	-4.73564	1.82872e-05
rs16897845	0.00852976	-1.73395	0.999573	-2.37634	0.00852976	-1.73395	0.999573	-2.37634	-4.75269	1.79782e-05
rs113455033	0.00856676	-1.73014	0.999571	-2.38079	0.00856676	-1.73014	0.999571	-2.38079	-4.76157	1.78192e-05
rs76279505	0.0139854	-1.56875	0.9993	-2.40228	0.0139854	-1.56875	0.9993	-2.40228	-4.80457	1.70693e-05
rs12676748	0.00845254	-1.72154	0.999577	-2.40233	0.00845254	-1.72154	0.999577	-2.40233	-4.80465	1.70678e-05
rs79749815	0.00854445	-1.71624	0.999572	-2.40602	0.00854445	-1.71624	0.999572	-2.40602	-4.81204	1.69422e-05
rs111919865	0.00338907	-1.96559	0.99983	-2.40893	0.00338907	-1.96559	0.99983	-2.40893	-4.81787	1.68438e-05
rs28848498	0.0044817	1.89318	0.999775	-2.40901	0.0044817	1.89318	0.999775	-2.40901	-4.81802	1.68413e-05
rs17312183	0.0104905	1.65126	0.999475	-2.41298	0.0104905	1.65126	0.999475	-2.41298	-4.82596	1.6708e-05
rs74934984	0.00851025	-1.71311	0.999574	-2.4134	0.00851025	-1.71311	0.999574	-2.4134	-4.82679	1.66941e-05
rs11368337	0.00336326	-1.96318	0.999831	-2.41747	0.00336326	-1.96318	0.999831	-2.41747	-4.83495	1.65585e-05
rs112265442	0.0104897	1.64663	0.999475	-2.42065	0.0104897	1.64663	0.999475	-2.42065	-4.8413	1.64536e-05
rs72720078	0.00852079	-1.70772	0.999573	-2.422	0.00852079	-1.70772	0.999573	-2.422	-4.844	1.64094e-05
rs111549981	0.010487	1.64177	0.999475	-2.42876	0.010487	1.64177	0.999475	-2.42876	-4.85753	1.61888e-05
rs80212468	0.0104872	1.64072	0.999475	-2.43048	0.0104872	1.64072	0.999475	-2.43048	-4.86095	1.61334e-05
rs111215888	0.00855956	-1.70059	0.999571	-2.43187	0.00855956	-1.70059	0.999571	-2.43187	-4.86374	1.60885e-05
rs77558478	0.0104864	1.6393	0.999475	-2.43284	0.0104864	1.6393	0.999475	-2.43284	-4.86569	1.60572e-05
rs35164000	0.0122935	1.58197	0.999384	-2.4458	0.0122935	1.58197	0.999384	-2.4458	-4.8916	1.56465e-05
rs56307644	0.0126419	-1.57276	0.999367	-2.44637	0.0126419	-1.57276	0.999367	-2.44637	-4.89273	1.56288e-05
rs16897866	0.0085871	-1.68552	0.99957	-2.45578	0.0085871	-1.68552	0.99957	-2.45578	-4.91155	1.53374e-05
rs17321459	0.00398704	1.89803	0.9998	-2.45825	0.00398704	1.89803	0.9998	-2.45825	-4.9165	1.52618e-05
rs72714356	0.00840077	1.68926	0.999579	-2.46042	0.00840077	1.68926	0.999579	-2.46042	-4.92084	1.51957e-05
rs11989210	0.00491576	-1.83772	0.999754	-2.46627	0.00491576	-1.83772	0.999754	-2.46627	-4.93255	1.50187e-05
rs4467938	0.00491695	-1.83712	0.999754	-2.46724	0.00491695	-1.83712	0.999754	-2.46724	-4.93449	1.49896e-05
rs4871319	0.0044668	-1.85848	0.999776	-2.47575	0.0044668	-1.85848	0.999776	-2.47575	-4.95149	1.47369e-05
rs12676387	0.00853687	-1.67054	0.999572	-2.48382	0.00853687	-1.67054	0.999572	-2.48382	-4.96764	1.45008e-05
rs12542768	0.00491566	-1.82276	0.999754	-2.49365	0.00491566	-1.82276	0.999754	-2.49365	-4.98731	1.42184e-05
rs73711615	0.0104426	1.59367	0.999477	-2.50864	0.0104426	1.59367	0.999477	-2.50864	-5.01729	1.37985e-05
rs16893038	0.00601512	1.75412	0.999699	-2.51556	0.00601512	1.75412	0.999699	-2.51556	-5.03112	1.36089e-05
rs36094025	0.00328783	-1.91426	0.999835	-2.52363	0.00328783	-1.91426	0.999835	-2.52363	-5.04727	1.33909e-05
rs7845507	0.00751041	-1.68115	0.999624	-2.53	0.00751041	-1.68115	0.999624	-2.53	-5.06	1.32215e-05
rs6991737	0.0033122	-1.90735	0.999834	-2.53316	0.0033122	-1.90735	0.999834	-2.53316	-5.06631	1.31383e-05
rs7826050	0.00384306	-1.8597	0.999807	-2.54862	0.00384306	-1.8597	0.999807	-2.54862	-5.09725	1.27381e-05
rs35605707	0.00505086	1.7821	0.999747	-2.55337	0.00505086	1.7821	0.999747	-2.55337	-5.10673	1.26179e-05
rs57298561	0.00450355	-1.8047	0.999774	-2.57013	0.00450355	-1.8047	0.999774	-2.57013	-5.14026	1.22018e-05
rs6981569	0.00487328	-1.78025	0.999756	-2.57455	0.00487328	-1.78025	0.999756	-2.57455	-5.1491	1.20945e-05
rs11774874	0.00486071	-1.77334	0.999756	-2.58811	0.00486071	-1.77334	0.999756	-2.58811	-5.17622	1.17708e-05
rs13260756	0.00417692	-1.80863	0.999791	-2.60065	0.00417692	-1.80863	0.999791	-2.60065	-5.20131	1.14792e-05
rs56290739	0.00328452	-1.86576	0.999835	-2.61579	0.00328452	-1.86576	0.999835	-2.61579	-5.23158	1.11369e-05
rs4242337	0.00513893	-1.74132	0.999743	-2.61656	0.00513893	-1.74132	0.999743	-2.61656	-5.23311	1.11199e-05
rs3830700	0.00815759	1.60301	0.999591	-2.617	0.00815759	1.60301	0.999591	-2.617	-5.23399	1.11101e-05
rs2294086	0.00814831	1.60135	0.999592	-2.62022	0.00814831	1.60135	0.999592	-2.62022	-5.24044	1.10387e-05
rs4871353	0.00683064	-1.65385	0.999658	-2.62288	0.00683064	-1.65385	0.999658	-2.62288	-5.24576	1.09801e-05
rs7012102	0.00375721	-1.82452	0.999812	-2.62469	0.00375721	-1.82452	0.999812	-2.62469	-5.24939	1.09404e-05
rs71310645	0.00387758	-1.81116	0.999806	-2.63323	0.00387758	-1.81116	0.999806	-2.63323	-5.26646	1.07551e-05
rs6990818	0.00338839	-1.84247	0.99983	-2.64341	0.00338839	-1.84247	0.99983	-2.64341	-5.28682	1.05384e-05
rs200260565	0.00348667	-1.83373	0.999825	-2.64519	0.00348667	-1.83373	0.999825	-2.64519	-5.29038	1.0501e-05
rs1955053	0.00418366	-1.77838	0.99979	-2.65408	0.00418366	-1.77838	0.99979	-2.65408	-5.30816	1.03159e-05
rs73336478	0.00459104	-1.74684	0.99977	-2.66325	0.00459104	-1.74684	0.99977	-2.66325	-5.3265	1.01284e-05
rs12679756	0.00349868	-1.82177	0.999825	-2.66533	0.00349868	-1.82177	0.999825	-2.66533	-5.33065	1.00865e-05
rs6986952	0.00458157	-1.74457	0.99977	-2.66825	0.00458157	-1.74457	0.99977	-2.66825	-5.3365	1.00277e-05
rs16897149	0.00459048	-1.74234	0.99977	-2.67116	0.00459048	-1.74234	0.99977	-2.67116	-5.34232	9.9695e-06
rs7816416	0.00346479	-1.82087	0.999826	-2.67183	0.00346479	-1.82087	0.999826	-2.67183	-5.34365	9.9562e-06
rs17313372	0.00431939	1.7581	0.999784	-2.67399	0.00431939	1.7581	0.999784	-2.67399	-5.34798	9.91319e-06
rs869114957	0.00659532	-1.63303	0.99967	-2.67459	0.00659532	-1.63303	0.99967	-2.67459	-5.34919	9.90123e-06
rs7828459	0.00459539	-1.73898	0.99977	-2.67648	0.00459539	-1.73898	0.99977	-2.67648	-5.35296	9.86396e-06
rs28446256	0.00459055	-1.73864	0.99977	-2.67759	0.00459055	-1.73864	0.99977	-2.67759	-5.35519	9.84201e-06
rs62521564	0.0056628	-1.67428	0.999716	-2.68254	0.0056628	-1.67428	0.999716	-2.68254	-5.36508	9.7451e-06
rs10661692	0.00504751	1.70432	0.999747	-2.68925	0.00504751	1.70432	0.999747	-2.68925	-5.3785	9.61521e-06
rs4242338	0.00515004	-1.69154	0.999742	-2.70091	0.00515004	-1.69154	0.999742	-2.70091	-5.40182	9.39354e-06
rs10096212	0.00459233	-1.72332	0.99977	-2.7039	0.00459233	-1.72332	0.99977	-2.7039	-5.40781	9.33753e-06
rs7817345	0.00502474	1.68819	0.999748	-2.71887	0.00502474	1.68819	0.999748	-2.71887	-5.43774	9.06219e-06
rs1014943	0.00608398	1.62481	0.999695	-2.72828	0.00608398	1.62481	0.999695	-2.72828	-5.45657	8.89313e-06
rs7813708	0.00518802	1.673	0.99974	-2.72841	0.00518802	1.673	0.99974	-2.72841	-5.45682	8.89092e-06
rs4481600	0.00459494	-1.70839	0.99977	-2.72924	0.00459494	-1.70839	0.99977	-2.72924	-5.45847	8.87622e-06
rs10505423	0.00459459	-1.708	0.99977	-2.72994	0.00459459	-1.708	0.99977	-2.72994	-5.45989	8.86367e-06
rs4382482	0.00459421	-1.70571	0.99977	-2.73389	0.00459421	-1.70571	0.99977	-2.73389	-5.46778	8.79394e-06
rs10091717	0.00459355	-1.70554	0.99977	-2.73426	0.00459355	-1.70554	0.99977	-2.73426	-5.46851	8.78752e-06
rs73336450	0.00459131	-1.70564	0.99977	-2.73432	0.00459131	-1.70564	0.99977	-2.73432	-5.46864	8.78641e-06
rs4437654	0.00459513	-1.70527	0.99977	-2.73454	0.00459513	-1.70527	0.99977	-2.73454	-5.46907	8.78262e-06
rs4631474	0.00459539	-1.70431	0.99977	-2.73615	0.00459539	-1.70431	0.99977	-2.73615	-5.4723	8.75434e-06
rs10808522	0.00417209	-1.73237	0.999791	-2.73621	0.00417209	-1.73237	0.999791	-2.73621	-5.47242	8.75323e-06
rs4431603	0.00459374	-1.70394	0.99977	-2.73696	0.00459374	-1.70394	0.99977	-2.73696	-5.47392	8.74011e-06
rs7461566	0.0045951	-1.70352	0.99977	-2.73752	0.0045951	-1.70352	0.99977	-2.73752	-5.47504	8.73033e-06
rs7464540	0.0045951	-1.70352	0.99977	-2.73752	0.0045951	-1.70352	0.99977	-2.73752	-5.47504	8.73033e-06
rs62521847	0.00528682	1.66163	0.999735	-2.73794	0.00528682	1.66163	0.999735	-2.73794	-5.47589	8.72296e-06
rs11991527	0.00417481	-1.72946	0.999791	-2.74094	0.00417481	-1.72946	0.999791	-2.74094	-5.48187	8.67092e-06
rs34895889	0.00613473	1.61294	0.999693	-2.74334	0.00613473	1.61294	0.999693	-2.74334	-5.48668	8.62934e-06
rs4386984	0.00459689	-1.69918	0.99977	-2.74472	0.00459689	-1.69918	0.99977	-2.74472	-5.48943	8.60562e-06
rs16896891	0.00417153	-1.72719	0.999791	-2.74524	0.00417153	-1.72719	0.999791	-2.74524	-5.49047	8.59666e-06
rs9656938	0.00416907	-1.72346	0.999791	-2.75197	0.00416907	-1.72346	0.999791	-2.75197	-5.50394	8.48165e-06
rs62521846	0.00527815	1.65355	0.999736	-2.75215	0.00527815	1.65355	0.999736	-2.75215	-5.5043	8.47858e-06
rs4871241	0.00416814	-1.72083	0.999791	-2.75661	0.00416814	-1.72083	0.999791	-2.75661	-5.51321	8.4034e-06
rs12549326	0.00416763	-1.71989	0.999791	-2.7583	0.00416763	-1.71989	0.999791	-2.7583	-5.5166	8.37499e-06
rs9693914	0.00501067	1.66424	0.999749	-2.7604	0.00501067	1.66424	0.999749	-2.7604	-5.52081	8.33979e-06
rs7817153	0.00500975	1.66248	0.999749	-2.76341	0.00500975	1.66248	0.999749	-2.76341	-5.52683	8.28974e-06
rs16898130	0.0050128	1.66013	0.999749	-2.76702	0.0050128	1.66013	0.999749	-2.76702	-5.53404	8.23014e-06
rs143278358	0.00421009	-1.70715	0.999789	-2.77505	0.00421009	-1.70715	0.999789	-2.77505	-5.55009	8.0991e-06
rs10956075	0.00421022	-1.70656	0.999789	-2.77605	0.00421022	-1.70656	0.999789	-2.77605	-5.5521	8.08288e-06
rs6997816	0.00501331	1.65301	0.999749	-2.77876	0.00501331	1.65301	0.999749	-2.77876	-5.55752	8.03918e-06
rs6980713	0.00366044	1.74518	0.999817	-2.77932	0.00366044	1.74518	0.999817	-2.77932	-5.55864	8.03018e-06
rs9694055	0.00420855	-1.703	0.999789	-2.78232	0.00420855	-1.703	0.999789	-2.78232	-5.56463	7.9822e-06
rs11779458	0.00501294	1.64741	0.999749	-2.78804	0.00501294	1.64741	0.999749	-2.78804	-5.57608	7.89135e-06
rs6997717	0.00501137	1.64717	0.999749	-2.78859	0.00501137	1.64717	0.999749	-2.78859	-5.57717	7.88274e-06
rs6997530	0.00501152	1.64675	0.999749	-2.78926	0.00501152	1.64675	0.999749	-2.78926	-5.57853	7.87206e-06
rs11783554	0.00504326	1.64245	0.999747	-2.79318	0.00504326	1.64245	0.999747	-2.79318	-5.58637	7.81058e-06
rs11786273	0.00501053	1.64248	0.999749	-2.79639	0.00501053	1.64248	0.999749	-2.79639	-5.59278	7.76069e-06
rs7013943	0.00417496	-1.69544	0.999791	-2.79916	0.00417496	-1.69544	0.999791	-2.79916	-5.59831	7.71782e-06
rs9720894	0.00420903	-1.69293	0.999789	-2.79935	0.00420903	-1.69293	0.999789	-2.79935	-5.59871	7.71478e-06
rs4870786	0.00416894	-1.69155	0.999791	-2.80646	0.00416894	-1.69155	0.999791	-2.80646	-5.61292	7.60592e-06
rs35514649	0.00416838	-1.68911	0.999791	-2.81066	0.00416838	-1.68911	0.999791	-2.81066	-5.62131	7.54237e-06
rs4478579	0.00330456	-1.74573	0.999834	-2.82945	0.00330456	-1.74573	0.999834	-2.82945	-5.65891	7.26407e-06
rs4385474	0.00330566	-1.73746	0.999834	-2.8437	0.00330566	-1.73746	0.999834	-2.8437	-5.6874	7.06003e-06
rs4506217	0.00330531	-1.73708	0.999834	-2.84441	0.00330531	-1.73708	0.999834	-2.84441	-5.68882	7.05001e-06
rs7814186	0.0050701	1.60891	0.999746	-2.84504	0.0050701	1.60891	0.999746	-2.84504	-5.69008	7.04114e-06
rs11779971	0.00524141	1.59323	0.999737	-2.85354	0.00524141	1.59323	0.999737	-2.85354	-5.70708	6.92241e-06
rs35671697	0.00425241	-1.64811	0.999787	-2.86908	0.00425241	-1.64811	0.999787	-2.86908	-5.73817	6.71053e-06
rs58294814	0.00464929	1.61433	0.999767	-2.8796	0.00464929	1.61433	0.999767	-2.8796	-5.7592	6.57088e-06
rs17377283	0.00523342	1.57714	0.999738	-2.8798	0.00523342	1.57714	0.999738	-2.8798	-5.75961	6.5682e-06
rs34704426	0.00530523	1.57246	0.999734	-2.88037	0.00530523	1.57246	0.999734	-2.88037	-5.76074	6.56079e-06
rs7003842	0.00523336	1.57619	0.999738	-2.8813	0.00523336	1.57619	0.999738	-2.8813	-5.7626	6.54859e-06
rs34947160	0.00523335	1.57492	0.999738	-2.8833	0.00523335	1.57492	0.999738	-2.8833	-5.7666	6.52243e-06
rs7833092	0.00523347	1.57271	0.999738	-2.88677	0.00523347	1.57271	0.999738	-2.88677	-5.77355	6.47726e-06
rs55724085	0.00522762	1.56971	0.999738	-2.89204	0.00522762	1.56971	0.999738	-2.89204	-5.78407	6.40947e-06
rs17377409	0.0052283	1.5687	0.999738	-2.89356	0.0052283	1.5687	0.999738	-2.89356	-5.78713	6.38992e-06
rs11782844	0.00522881	1.56833	0.999738	-2.89409	0.00522881	1.56833	0.999738	-2.89409	-5.78818	6.3832e-06
rs13270162	0.00522944	1.56669	0.999738	-2.8966	0.00522944	1.56669	0.999738	-2.8966	-5.79321	6.35116e-06
rs6150791	0.00444677	1.61607	0.999777	-2.89904	0.00444677	1.61607	0.999777	-2.89904	-5.79808	6.32031e-06
rs7813460	0.00522391	1.56203	0.999738	-2.90443	0.00522391	1.56203	0.999738	-2.90443	-5.80885	6.25259e-06
rs7814154	0.00522486	1.56032	0.999738	-2.907	0.00522486	1.56032	0.999738	-2.907	-5.81399	6.22052e-06
rs2023126	0.00464142	1.59572	0.999767	-2.91031	0.00464142	1.59572	0.999767	-2.91031	-5.82062	6.17946e-06
rs7006321	0.00463338	1.58416	0.999768	-2.92955	0.00463338	1.58416	0.999768	-2.92955	-5.85909	5.94621e-06
rs7818634	0.00463549	1.58398	0.999768	-2.92961	0.00463549	1.58398	0.999768	-2.92961	-5.85922	5.94544e-06
rs7821321	0.00336133	-1.67921	0.999832	-2.93484	0.00336133	-1.67921	0.999832	-2.93484	-5.86969	5.88354e-06
rs4458885	0.00329846	-1.67981	0.999835	-2.94327	0.00329846	-1.67981	0.999835	-2.94327	-5.88655	5.78519e-06
rs4549775	0.00342747	-1.66315	0.999828	-2.95195	0.00342747	-1.66315	0.999828	-2.95195	-5.90389	5.68572e-06
rs6470121	0.00360629	1.64646	0.999819	-2.95414	0.00360629	1.64646	0.999819	-2.95414	-5.90828	5.66082e-06
rs10956083	0.00335862	-1.65936	0.999832	-2.96838	0.00335862	-1.65936	0.999832	-2.96838	-5.93675	5.50192e-06
rs4541929	0.00329727	-1.65232	0.999835	-2.98925	0.00329727	-1.65232	0.999835	-2.98925	-5.9785	5.27695e-06
rs4289822	0.00328899	-1.65121	0.999835	-2.99234	0.00328899	-1.65121	0.999835	-2.99234	-5.98467	5.24448e-06
rs28623205	0.00328855	-1.65105	0.999835	-2.99267	0.00328855	-1.65105	0.999835	-2.99267	-5.98533	5.241e-06
rs4871304	0.00358958	-1.62227	0.99982	-2.99598	0.00358958	-1.62227	0.99982	-2.99598	-5.99197	5.20635e-06
rs4500085	0.00328267	-1.64839	0.999836	-2.99794	0.00328267	-1.64839	0.999836	-2.99794	-5.99587	5.18605e-06
rs4368984	0.00340225	-1.63596	0.99983	-3.00048	0.00340225	-1.63596	0.99983	-3.00048	-6.00097	5.15971e-06
rs28495324	0.00328297	-1.64349	0.999835	-3.00597	0.00328297	-1.64349	0.999835	-3.00597	-6.01193	5.10345e-06
rs72722089	0.0040948	-1.5745	0.999795	-3.00654	0.0040948	-1.5745	0.999795	-3.00654	-6.01308	5.09758e-06
rs7815281	0.00328473	-1.64237	0.999835	-3.00753	0.00328473	-1.64237	0.999835	-3.00753	-6.01506	5.08749e-06
rs6992617	0.00335835	-1.62987	0.999832	-3.01691	0.00335835	-1.62987	0.999832	-3.01691	-6.03382	4.99293e-06
rs7823149	0.00328249	-1.62866	0.999836	-3.03029	0.00328249	-1.62866	0.999836	-3.03029	-6.06057	4.86114e-06
rs7812750	0.00328675	-1.62736	0.999835	-3.03176	0.00328675	-1.62736	0.999835	-3.03176	-6.06351	4.84688e-06
rs62525517	0.00328753	-1.61949	0.999835	-3.04442	0.00328753	-1.61949	0.999835	-3.04442	-6.08885	4.72562e-06
rs62525518	0.00328781	-1.61597	0.999835	-3.05007	0.00328781	-1.61597	0.999835	-3.05007	-6.10014	4.67257e-06
rs4495430	0.00328363	-1.60282	0.999835	-3.07186	0.00328363	-1.60282	0.999835	-3.07186	-6.14373	4.47326e-06
rs7007171	0.00368745	-1.56207	0.999815	-3.07838	0.00368745	-1.56207	0.999815	-3.07838	-6.15677	4.41533e-06
rs6470085	0.0032825	-1.59794	0.999836	-3.07984	0.0032825	-1.59794	0.999836	-3.07984	-6.15968	4.40246e-06
rs11419631	0.00328925	-1.59648	0.999835	-3.08114	0.00328925	-1.59648	0.999835	-3.08114	-6.16229	4.39102e-06
rs10217064	0.00328638	-1.59107	0.999835	-3.09021	0.00328638	-1.59107	0.999835	-3.09021	-6.18042	4.31211e-06
rs34919965	0.00329261	-1.58396	0.999835	-3.10055	0.00329261	-1.58396	0.999835	-3.10055	-6.2011	4.22384e-06
rs4506218	0.00328681	-1.57729	0.999835	-3.11197	0.00328681	-1.57729	0.999835	-3.11197	-6.22395	4.12845e-06
rs11774296	0.00328464	-1.57714	0.999835	-3.11253	0.00328464	-1.57714	0.999835	-3.11253	-6.22507	4.12382e-06
rs3935839	0.00328138	-1.57658	0.999836	-3.11392	0.00328138	-1.57658	0.999836	-3.11392	-6.22783	4.11244e-06
rs4401868	0.00347391	-1.55208	0.999826	-3.12374	0.00347391	-1.55208	0.999826	-3.12374	-6.24747	4.03246e-06
rs4282578	0.0032831	-1.56486	0.999835	-3.13205	0.0032831	-1.56486	0.999835	-3.13205	-6.26411	3.96592e-06
rs4573289	0.00328418	-1.56103	0.999835	-3.13788	0.00328418	-1.56103	0.999835	-3.13788	-6.27576	3.91999e-06
rs4301458	0.00328417	-1.56006	0.999835	-3.13939	0.00328417	-1.56006	0.999835	-3.13939	-6.27879	3.90814e-06
rs7829646	0.00330588	-1.55756	0.999834	-3.13999	0.00330588	-1.55756	0.999834	-3.13999	-6.27999	3.90345e-06
rs62525506	0.00328551	-1.55869	0.999835	-3.14133	0.00328551	-1.55869	0.999835	-3.14133	-6.28266	3.89302e-06
rs4563889	0.00328554	-1.55623	0.999835	-3.14516	0.00328554	-1.55623	0.999835	-3.14516	-6.29031	3.86336e-06
rs7814921	0.00328522	-1.55283	0.999835	-3.15048	0.00328522	-1.55283	0.999835	-3.15048	-6.30097	3.82241e-06
rs10112037	0.00328473	-1.55279	0.999835	-3.15063	0.00328473	-1.55279	0.999835	-3.15063	-6.30125	3.82132e-06
rs4300010	0.00328378	-1.55179	0.999835	-3.15231	0.00328378	-1.55179	0.999835	-3.15231	-6.30463	3.80843e-06

## Sheet: PDLIM1
snp	V.df1	z.df1	r.df1	lABF.df1	V.df2	z.df2	r.df2	lABF.df2	internal.sum.lABF	SNP.PP.H4
rs150094627	0.133129	3.63092	0.993715	4.01559	0.133129	3.63092	0.993715	4.01559	8.03117	0.780819
rs118025792	0.129509	-3.41029	0.993885	3.23099	0.129509	-3.41029	0.993885	3.23099	6.46199	0.162578
rs61888013	0.119852	3.10505	0.994338	2.20639	0.119852	3.10505	0.994338	2.20639	4.41279	0.0209462
rs57700608	7.91589	2.42269	0.726697	1.48406	7.91589	2.42269	0.726697	1.48406	2.96811	0.0049396
rs191189717	0.13742	-2.82815	0.993513	1.45426	0.13742	-2.82815	0.993513	1.45426	2.90851	0.0046538
rs182080397	0.13729	-2.82446	0.99352	1.44347	0.13729	-2.82446	0.99352	1.44347	2.88693	0.00455444
rs144227205	0.139354	2.71207	0.993423	1.1414	0.139354	2.71207	0.993423	1.1414	2.28279	0.0024892
rs117406673	0.169906	2.66812	0.991992	1.11725	0.169906	2.66812	0.991992	1.11725	2.23449	0.00237184
rs148309171	0.183197	2.56068	0.991371	0.873923	0.183197	2.56068	0.991371	0.873923	1.74785	0.00145793
rs138975797	2.98875	2.08832	0.875659	0.867049	2.98875	2.08832	0.875659	0.867049	1.7341	0.00143802
rs61869971	0.129073	2.54971	0.993905	0.680546	0.129073	2.54971	0.993905	0.680546	1.36109	0.000990311
rs182301440	0.188204	-2.44253	0.991138	0.59357	0.188204	-2.44253	0.991138	0.59357	1.18714	0.000832194
rs140103426	6.46934	1.84854	0.764899	0.583002	6.46934	1.84854	0.764899	0.583002	1.166	0.00081479
rs753021273	3.26554	1.83676	0.86569	0.456479	3.26554	1.83676	0.86569	0.456479	0.912957	0.000632629
rs763132585	5.39136	1.75861	0.796086	0.435998	5.39136	1.75861	0.796086	0.435998	0.871995	0.000607238
rs76582644	0.113906	2.45621	0.994617	0.387951	0.113906	2.45621	0.994617	0.387951	0.775903	0.000551603
rs191711664	0.113512	2.44418	0.994636	0.356985	0.113512	2.44418	0.994636	0.356985	0.713969	0.000518477
rs182955781	0.113395	2.4371	0.994641	0.339275	0.113395	2.4371	0.994641	0.339275	0.678549	0.000500434
rs139880572	0.120389	-2.39503	0.994313	0.267013	0.120389	-2.39503	0.994313	0.267013	0.534025	0.000433092
rs200965026	16.7813	1.52526	0.556393	0.240792	16.7813	1.52526	0.556393	0.240792	0.481583	0.000410966
rs558907582	0.169916	2.2862	0.991992	0.178785	0.169916	2.2862	0.991992	0.178785	0.357569	0.000363034
rs191701143	0.0531759	2.5195	0.99748	0.174212	0.0531759	2.5195	0.99748	0.174212	0.348425	0.000359729
rs201691969	4.40097	1.56931	0.827066	0.140994	4.40097	1.56931	0.827066	0.140994	0.281988	0.000336606
rs182702572	0.0803445	2.41424	0.996197	0.117175	0.0803445	2.41424	0.996197	0.117175	0.23435	0.000320947
rs141952369	0.145928	2.27319	0.993115	0.0767291	0.145928	2.27319	0.993115	0.0767291	0.153458	0.000296007
rs186327276	0.0800992	2.3953	0.996209	0.0703011	0.0800992	2.3953	0.996209	0.0703011	0.140602	0.000292226
rs770829708	1201.9	1.95299	0.0172108	0.0241421	1201.9	1.95299	0.0172108	0.0241421	0.0482841	0.000266456
rs373479905	4.32074	1.44489	0.829682	-0.0189754	4.32074	1.44489	0.829682	-0.0189754	-0.0379508	0.000244441
rs183078133	0.0912421	2.30637	0.995684	-0.074493	0.0912421	2.30637	0.995684	-0.074493	-0.148986	0.000218752
rs146088687	9.70347	1.18709	0.684455	-0.0944689	9.70347	1.18709	0.684455	-0.0944689	-0.188938	0.000210185
rs141124490	0.0598385	-2.36592	0.997165	-0.14202	0.0598385	-2.36592	0.997165	-0.14202	-0.28404	0.000191117
rs148879826	0.0961291	2.23765	0.995454	-0.20456	0.0961291	2.23765	0.995454	-0.20456	-0.409119	0.000168647
rs142162552	0.0471276	-2.37846	0.997766	-0.229746	0.0471276	-2.37846	0.997766	-0.229746	-0.459491	0.000160362
rs200150287	1.69612	-1.51668	0.925426	-0.233593	1.69612	-1.51668	0.925426	-0.233593	-0.467186	0.000159133
rs778724786	0.0656251	2.28727	0.996892	-0.279186	0.0656251	2.28727	0.996892	-0.279186	-0.558372	0.000145264
rs187124783	0.0937468	2.18688	0.995566	-0.328577	0.0937468	2.18688	0.995566	-0.328577	-0.657155	0.000131601
rs67807361	3.07343	1.2359	0.872585	-0.363739	3.07343	1.2359	0.872585	-0.363739	-0.727477	0.000122664
rs116922951	0.213854	1.95666	0.989942	-0.404686	0.213854	1.95666	0.989942	-0.404686	-0.809372	0.000113019
rs189171686	0.0874456	-2.16646	0.995863	-0.406773	0.0874456	-2.16646	0.995863	-0.406773	-0.813547	0.000112548
rs201232632	0.121449	2.06815	0.994263	-0.454062	0.121449	2.06815	0.994263	-0.454062	-0.908125	0.000102391
rs113309814	0.0802855	-2.14647	0.9962	-0.491474	0.0802855	-2.14647	0.9962	-0.491474	-0.982948	9.50096e-05
rs80081228	0.179967	1.94827	0.991522	-0.503357	0.179967	1.94827	0.991522	-0.503357	-1.00671	9.27783e-05
rs75788106	0.0443418	-2.25835	0.997898	-0.537667	0.0443418	-2.25835	0.997898	-0.537667	-1.07533	8.66253e-05
rs147516484	0.059884	-2.15557	0.997163	-0.615844	0.059884	-2.15557	0.997163	-0.615844	-1.23169	7.40868e-05
rs62625037	0.631232	-1.5264	0.970883	-0.637182	0.631232	-1.5264	0.970883	-0.637182	-1.27436	7.09917e-05
rs558725389	0.142423	1.93519	0.993279	-0.641362	0.142423	1.93519	0.993279	-0.641362	-1.28272	7.04007e-05
rs148964035	0.139682	1.93826	0.993407	-0.644868	0.139682	1.93826	0.993407	-0.644868	-1.28974	6.99087e-05
rs578150668	0.659065	-1.48948	0.969638	-0.671692	0.659065	-1.48948	0.969638	-0.671692	-1.34338	6.62571e-05
rs116878692	0.0724552	2.07277	0.996569	-0.696702	0.0724552	2.07277	0.996569	-0.696702	-1.3934	6.30244e-05
rs145322265	0.0965581	2.00077	0.995433	-0.702091	0.0965581	2.00077	0.995433	-0.702091	-1.40418	6.23488e-05
rs75522380	0.155938	1.87832	0.992646	-0.705165	0.155938	1.87832	0.992646	-0.705165	-1.41033	6.19667e-05
rs200991251	0.13267	1.91726	0.993736	-0.710052	0.13267	1.91726	0.993736	-0.710052	-1.4201	6.13639e-05
rs189823182	0.140879	1.86956	0.993351	-0.770662	0.140879	1.86956	0.993351	-0.770662	-1.54132	5.43585e-05
rs142997475	0.0801926	2.00864	0.996204	-0.777309	0.0801926	2.00864	0.996204	-0.777309	-1.55462	5.36406e-05
rs139879822	0.153754	1.83074	0.992748	-0.799583	0.153754	1.83074	0.992748	-0.799583	-1.59917	5.13036e-05
rs149003817	0.0804925	1.9679	0.99619	-0.856173	0.0804925	1.9679	0.99619	-0.856173	-1.71235	4.58135e-05
rs138039253	0.059726	2.04014	0.99717	-0.858614	0.059726	2.04014	0.99717	-0.858614	-1.71723	4.55905e-05
rs201801058	0.350354	-1.53358	0.983627	-0.899376	0.350354	-1.53358	0.983627	-0.899376	-1.79875	4.20212e-05
rs78967886	0.080033	1.93355	0.996212	-0.925739	0.080033	1.93355	0.996212	-0.925739	-1.85148	3.9863e-05
rs145027435	0.0858279	1.91145	0.995939	-0.933747	0.0858279	1.91145	0.995939	-0.933747	-1.86749	3.92296e-05
rs542539639	0.186729	-1.67139	0.991206	-0.982373	0.186729	-1.67139	0.991206	-0.982373	-1.96475	3.55941e-05
rs149152472	0.0719151	-1.92916	0.996595	-0.986747	0.0719151	-1.92916	0.996595	-0.986747	-1.97349	3.52841e-05
rs142229006	0.160887	-1.70042	0.992414	-1.00599	0.160887	-1.70042	0.992414	-1.00599	-2.01197	3.39522e-05
rs73317299	0.123155	1.77257	0.994183	-1.01161	0.123155	1.77257	0.994183	-1.01161	-2.02323	3.35722e-05
rs147400639	0.0980028	1.81034	0.995365	-1.05604	0.0980028	1.81034	0.995365	-1.05604	-2.11208	3.07179e-05
rs186010805	0.167788	-1.65686	0.992091	-1.05816	0.167788	-1.65686	0.992091	-1.05816	-2.11632	3.0588e-05
rs72824551	0.0347774	2.03127	0.99835	-1.14399	0.0347774	2.03127	0.99835	-1.14399	-2.28798	2.57632e-05
rs78543595	0.12002	-1.70031	0.99433	-1.14896	0.12002	-1.70031	0.99433	-1.14896	-2.29792	2.55083e-05
rs116959137	0.102802	-1.7274	0.99514	-1.17861	0.102802	-1.7274	0.99514	-1.17861	-2.35721	2.40399e-05
rs116215092	0.0447293	1.93348	0.997879	-1.21282	0.0447293	1.93348	0.997879	-1.21282	-2.42564	2.24498e-05
rs141874761	0.13884	1.61126	0.993447	-1.22434	0.13884	1.61126	0.993447	-1.22434	-2.44867	2.19387e-05
rs191164023	0.185193	-1.51488	0.991278	-1.23354	0.185193	-1.51488	0.991278	-1.23354	-2.46709	2.15384e-05
rs41291556	0.278384	-1.37633	0.986946	-1.23457	0.278384	-1.37633	0.986946	-1.23457	-2.46915	2.14941e-05
rs534649860	0.216468	-1.4609	0.98982	-1.23743	0.216468	-1.4609	0.98982	-1.23743	-2.47485	2.13719e-05
rs373251721	0.16951	-1.52206	0.992011	-1.26575	0.16951	-1.52206	0.992011	-1.26575	-2.53151	2.01947e-05
rs566437223	0.208045	-1.45066	0.990212	-1.27141	0.208045	-1.45066	0.990212	-1.27141	-2.54283	1.99674e-05
rs117167269	0.132942	-1.59199	0.993723	-1.27621	0.132942	-1.59199	0.993723	-1.27621	-2.55241	1.97768e-05
rs117864318	0.0469979	-1.87915	0.997772	-1.29167	0.0469979	-1.87915	0.997772	-1.29167	-2.58333	1.91748e-05
rs183590653	0.176877	-1.47555	0.991666	-1.31418	0.176877	-1.47555	0.991666	-1.31418	-2.62835	1.83306e-05
rs557843029	0.183981	1.45598	0.991335	-1.32347	0.183981	1.45598	0.991335	-1.32347	-2.64693	1.79932e-05
rs10786225	0.0151691	2.12332	0.99928	-1.3654	0.0151691	2.12332	0.99928	-1.3654	-2.73079	1.65458e-05
rs142017270	0.124249	1.54961	0.994131	-1.37547	0.124249	1.54961	0.994131	-1.37547	-2.75095	1.62157e-05
rs199816981	0.0638169	1.74157	0.996977	-1.38883	0.0638169	1.74157	0.996977	-1.38883	-2.77766	1.57882e-05
rs188968314	0.111117	-1.57404	0.994748	-1.39232	0.111117	-1.57404	0.994748	-1.39232	-2.78465	1.56783e-05
rs550482436	0.139827	1.4911	0.993401	-1.40603	0.139827	1.4911	0.993401	-1.40603	-2.81206	1.52543e-05
rs112645715	0.0701752	-1.70155	0.996677	-1.41062	0.0701752	-1.70155	0.996677	-1.41062	-2.82124	1.5115e-05
rs117081076	0.131135	-1.50272	0.993808	-1.42018	0.131135	-1.50272	0.993808	-1.42018	-2.84036	1.48288e-05
rs188791268	0.163421	1.42863	0.992296	-1.42036	0.163421	1.42863	0.992296	-1.42036	-2.84071	1.48235e-05
rs76048671	0.130777	1.4899	0.993825	-1.44059	0.130777	1.4899	0.993825	-1.44059	-2.88117	1.42357e-05
rs78652428	0.0886152	-1.60326	0.995807	-1.4574	0.0886152	-1.60326	0.995807	-1.4574	-2.91479	1.3765e-05
rs181725246	0.161185	1.39634	0.9924	-1.47234	0.161185	1.39634	0.9924	-1.47234	-2.94468	1.33597e-05
rs58671772	0.113084	1.50433	0.994656	-1.49043	0.113084	1.50433	0.994656	-1.49043	-2.98087	1.28849e-05
rs78448436	0.0712703	1.64696	0.996625	-1.49407	0.0712703	1.64696	0.996625	-1.49407	-2.98814	1.27915e-05
rs192805805	0.163437	-1.36588	0.992295	-1.50731	0.163437	-1.36588	0.992295	-1.50731	-3.01462	1.24573e-05
rs139224945	0.186656	-1.30946	0.99121	-1.51726	0.186656	-1.30946	0.99121	-1.51726	-3.03451	1.22119e-05
rs141439072	0.091852	-1.53861	0.995655	-1.54086	0.091852	-1.53861	0.995655	-1.54086	-3.08171	1.16489e-05
rs35655155	0.020286	1.95073	0.999037	-1.57195	0.020286	1.95073	0.999037	-1.57195	-3.14389	1.09466e-05
rs200182780	0.0606307	1.6372	0.997128	-1.58995	0.0606307	1.6372	0.997128	-1.58995	-3.1799	1.05595e-05
rs117658070	0.059377	-1.64315	0.997187	-1.59057	0.059377	-1.64315	0.997187	-1.59057	-3.18113	1.05465e-05
rs116871102	0.083761	-1.53485	0.996036	-1.59207	0.083761	-1.53485	0.996036	-1.59207	-3.18414	1.05148e-05
rs112014986	0.070697	-1.58638	0.996652	-1.59567	0.070697	-1.58638	0.996652	-1.59567	-3.19133	1.04395e-05
rs148793981	0.0903057	1.50196	0.995728	-1.60469	0.0903057	1.50196	0.995728	-1.60469	-3.20938	1.02528e-05
rs190651741	0.110404	1.43159	0.994782	-1.60845	0.110404	1.43159	0.994782	-1.60845	-3.2169	1.0176e-05
rs374773766	0.170627	1.25323	0.991959	-1.6326	0.170627	1.25323	0.991959	-1.6326	-3.2652	9.69616e-06
rs111856689	0.0606637	-1.59327	0.997126	-1.66044	0.0606637	-1.59327	0.997126	-1.66044	-3.32088	9.17097e-06
rs543936520	0.16502	-1.23902	0.992221	-1.66653	0.16502	-1.23902	0.992221	-1.66653	-3.33306	9.05996e-06
rs543366239	0.182684	-1.19534	0.991395	-1.66945	0.182684	-1.19534	0.991395	-1.66945	-3.3389	9.00719e-06
rs74962148	0.168926	1.22707	0.992038	-1.66969	0.168926	1.22707	0.992038	-1.66969	-3.33938	9.00289e-06
rs139425463	0.0834649	-1.48316	0.99605	-1.6715	0.0834649	-1.48316	0.99605	-1.6715	-3.34301	8.97029e-06
rs188397099	0.173355	1.20868	0.991831	-1.67923	0.173355	1.20868	0.991831	-1.67923	-3.35846	8.83277e-06
rs554193528	0.0993964	-1.41408	0.9953	-1.68497	0.0993964	-1.41408	0.9953	-1.68497	-3.36994	8.73195e-06
rs374678068	0.0970615	-1.42012	0.99541	-1.68817	0.0970615	-1.42012	0.99541	-1.68817	-3.37634	8.67621e-06
rs570720206	0.165094	1.21004	0.992217	-1.70153	0.165094	1.21004	0.992217	-1.70153	-3.40307	8.44739e-06
rs545755791	0.169094	1.19507	0.99203	-1.70765	0.169094	1.19507	0.99203	-1.70765	-3.4153	8.34468e-06
rs192037869	0.174494	-1.17755	0.991778	-1.71285	0.174494	-1.17755	0.991778	-1.71285	-3.4257	8.2584e-06
rs563242889	0.101688	1.37014	0.995192	-1.73461	0.101688	1.37014	0.995192	-1.73461	-3.46922	7.90663e-06
rs147818336	0.102335	-1.36286	0.995162	-1.74137	0.102335	-1.36286	0.995162	-1.74137	-3.48274	7.80048e-06
rs186702974	0.149109	-1.21788	0.992966	-1.74207	0.149109	-1.21788	0.992966	-1.74207	-3.48415	7.78952e-06
rs77894611	0.0456412	1.62785	0.997836	-1.74587	0.0456412	1.62785	0.997836	-1.74587	-3.49175	7.73055e-06
rs181077475	0.128537	1.27245	0.99393	-1.74756	0.128537	1.27245	0.99393	-1.74756	-3.49513	7.70446e-06
rs150342216	0.0489697	1.59939	0.997679	-1.75679	0.0489697	1.59939	0.997679	-1.75679	-3.51358	7.5636e-06
rs11299411	0.0183743	1.87811	0.999128	-1.76014	0.0183743	1.87811	0.999128	-1.76014	-3.52027	7.51315e-06
rs111414059	0.0315318	1.72622	0.998504	-1.76484	0.0315318	1.72622	0.998504	-1.76484	-3.52969	7.44274e-06
rs72824576	0.032327	1.71787	0.998466	-1.76682	0.032327	1.71787	0.998466	-1.76682	-3.53364	7.4134e-06
rs140508648	0.0323241	1.71727	0.998467	-1.76789	0.0323241	1.71727	0.998467	-1.76789	-3.53577	7.39759e-06
rs72824578	0.032327	1.71722	0.998466	-1.76793	0.032327	1.71722	0.998466	-1.76793	-3.53587	7.39687e-06
rs149755021	0.126911	1.26102	0.994007	-1.76822	0.126911	1.26102	0.994007	-1.76822	-3.53644	7.39264e-06
rs72824561	0.0323629	1.71541	0.998465	-1.77048	0.0323629	1.71541	0.998465	-1.77048	-3.54097	7.35924e-06
rs146309958	0.14715	-1.19937	0.993057	-1.77079	0.14715	-1.19937	0.993057	-1.77079	-3.54157	7.3548e-06
rs11486213	0.0558349	-1.54827	0.997354	-1.772	0.0558349	-1.54827	0.997354	-1.772	-3.544	7.33699e-06
rs56009398	0.03235	1.71328	0.998465	-1.77432	0.03235	1.71328	0.998465	-1.77432	-3.54864	7.30298e-06
rs55729240	0.0323388	1.7127	0.998466	-1.7755	0.0323388	1.7127	0.998466	-1.7755	-3.551	7.28579e-06
rs61868622	0.154442	-1.17505	0.992716	-1.77568	0.154442	-1.17505	0.992716	-1.77568	-3.55137	7.28312e-06
rs72824552	0.0323698	1.71156	0.998464	-1.77697	0.0323698	1.71156	0.998464	-1.77697	-3.55393	7.26446e-06
rs201828119	0.124801	1.25868	0.994106	-1.7794	0.124801	1.25868	0.994106	-1.7794	-3.55881	7.22913e-06
rs72824580	0.0322874	1.70842	0.998468	-1.78359	0.0322874	1.70842	0.998468	-1.78359	-3.56718	7.16884e-06
rs72824582	0.0322874	1.70842	0.998468	-1.78359	0.0322874	1.70842	0.998468	-1.78359	-3.56718	7.16884e-06
rs72822582	0.0435628	-1.61854	0.997935	-1.78408	0.0435628	-1.61854	0.997935	-1.78408	-3.56816	7.16184e-06
rs72809755	0.032272	1.70622	0.998469	-1.78757	0.032272	1.70622	0.998469	-1.78757	-3.57515	7.11197e-06
rs145252965	0.138929	-1.20548	0.993443	-1.79176	0.138929	-1.20548	0.993443	-1.79176	-3.58353	7.05262e-06
rs72809757	0.0322594	1.70229	0.99847	-1.79447	0.0322594	1.70229	0.99847	-1.79447	-3.58894	7.01458e-06
rs548484156	0.11426	-1.27568	0.994601	-1.80146	0.11426	-1.27568	0.994601	-1.80146	-3.60292	6.91719e-06
rs143053033	0.0554946	1.52631	0.99737	-1.80871	0.0554946	1.52631	0.99737	-1.80871	-3.61741	6.81763e-06
rs138182683	0.114531	-1.25747	0.994588	-1.82323	0.114531	-1.25747	0.994588	-1.82323	-3.64646	6.62245e-06
rs76374361	0.0597206	-1.49067	0.997171	-1.82596	0.0597206	-1.49067	0.997171	-1.82596	-3.65192	6.58642e-06
rs144414415	0.0735245	-1.41706	0.996519	-1.82968	0.0735245	-1.41706	0.996519	-1.82968	-3.65936	6.53755e-06
rs72822570	0.0436283	-1.5888	0.997931	-1.83093	0.0436283	-1.5888	0.997931	-1.83093	-3.66186	6.52126e-06
rs12356841	0.117573	-1.23823	0.994445	-1.83419	0.117573	-1.23823	0.994445	-1.83419	-3.66838	6.47889e-06
rs75668896	0.0550925	1.51149	0.997389	-1.83477	0.0550925	1.51149	0.997389	-1.83477	-3.66953	6.47141e-06
rs144743946	0.0551057	1.51082	0.997389	-1.83566	0.0551057	1.51082	0.997389	-1.83566	-3.67132	6.45988e-06
rs191346233	0.131269	1.19172	0.993802	-1.83607	0.131269	1.19172	0.993802	-1.83607	-3.67213	6.4546e-06
rs116871173	0.0696907	1.43066	0.9967	-1.83688	0.0696907	1.43066	0.9967	-1.83688	-3.67376	6.44409e-06
rs4357625	0.0196006	1.81877	0.99907	-1.83755	0.0196006	1.81877	0.99907	-1.83755	-3.6751	6.4355e-06
rs76578969	0.0550198	1.506	0.997393	-1.84368	0.0550198	1.506	0.997393	-1.84368	-3.68736	6.35703e-06
rs146390284	0.0338895	1.65809	0.998392	-1.84411	0.0338895	1.65809	0.998392	-1.84411	-3.68823	6.35155e-06
rs118112194	0.0550761	1.50452	0.99739	-1.84539	0.0550761	1.50452	0.99739	-1.84539	-3.69079	6.33531e-06
rs77341277	0.0551597	1.50079	0.997386	-1.85023	0.0551597	1.50079	0.997386	-1.85023	-3.70046	6.27432e-06
rs147631063	0.0563977	1.49178	0.997328	-1.85267	0.0563977	1.49178	0.997328	-1.85267	-3.70533	6.24383e-06
rs188516914	0.128597	-1.18528	0.993927	-1.85381	0.128597	-1.18528	0.993927	-1.85381	-3.70761	6.22962e-06
rs117078827	0.0563341	1.49063	0.997331	-1.85494	0.0563341	1.49063	0.997331	-1.85494	-3.70989	6.21546e-06
rs80347446	0.0552377	1.49532	0.997382	-1.8577	0.0552377	1.49532	0.997382	-1.8577	-3.7154	6.18129e-06
rs149857936	0.0552006	1.49423	0.997384	-1.85966	0.0552006	1.49423	0.997384	-1.85966	-3.71931	6.15714e-06
rs192046940	0.0801252	1.36456	0.996208	-1.8599	0.0801252	1.36456	0.996208	-1.8599	-3.71979	6.15419e-06
rs74655665	0.0552687	1.49309	0.997381	-1.86075	0.0552687	1.49309	0.997381	-1.86075	-3.72149	6.14372e-06
rs140280033	0.0818097	1.34528	0.996128	-1.87563	0.0818097	1.34528	0.996128	-1.87563	-3.75126	5.96352e-06
rs183908836	0.109214	1.22656	0.994838	-1.88487	0.109214	1.22656	0.994838	-1.88487	-3.76975	5.8543e-06
rs367999913	0.106539	-1.23377	0.994964	-1.88828	0.106539	-1.23377	0.994964	-1.88828	-3.77657	5.81451e-06
rs533822901	0.0835129	1.32433	0.996048	-1.8933	0.0835129	1.32433	0.996048	-1.8933	-3.7866	5.7565e-06
rs140591324	0.108692	1.21994	0.994863	-1.89529	0.108692	1.21994	0.994863	-1.89529	-3.79059	5.73358e-06
rs61280152	0.014259	-1.86893	0.999323	-1.90365	0.014259	-1.86893	0.999323	-1.90365	-3.80731	5.6385e-06
rs148442089	0.0648451	-1.4058	0.996929	-1.90771	0.0648451	-1.4058	0.996929	-1.90771	-3.81543	5.59291e-06
rs149249947	0.0812832	1.32118	0.996153	-1.91084	0.0812832	1.32118	0.996153	-1.91084	-3.82168	5.55803e-06
rs58247371	0.0494515	-1.48977	0.997656	-1.92085	0.0494515	-1.48977	0.997656	-1.92085	-3.84171	5.44784e-06
rs72822555	0.0532474	-1.46023	0.997477	-1.92762	0.0532474	-1.46023	0.997477	-1.92762	-3.85523	5.37466e-06
rs146431115	0.0328374	1.61548	0.998442	-1.92942	0.0328374	1.61548	0.998442	-1.92942	-3.85883	5.35533e-06
rs149224397	0.0214467	-1.7416	0.998982	-1.92996	0.0214467	-1.7416	0.998982	-1.92996	-3.85992	5.34949e-06
rs117189380	0.0612077	-1.40537	0.9971	-1.93692	0.0612077	-1.40537	0.9971	-1.93692	-3.87384	5.27555e-06
rs117890381	0.109431	-1.18195	0.994828	-1.93734	0.109431	-1.18195	0.994828	-1.93734	-3.87467	5.27119e-06
rs112957062	0.0328664	1.60935	0.998441	-1.93885	0.0328664	1.60935	0.998441	-1.93885	-3.87769	5.25528e-06
rs199904246	0.07376	-1.33612	0.996508	-1.93913	0.07376	-1.33612	0.996508	-1.93913	-3.87827	5.25225e-06
rs72822542	0.053145	1.4318	0.997481	-1.96959	0.053145	1.4318	0.997481	-1.96959	-3.93918	4.94189e-06
rs72822550	0.0537544	-1.42523	0.997453	-1.97329	0.0537544	-1.42523	0.997453	-1.97329	-3.94658	4.90542e-06
rs76043393	0.0800064	1.27759	0.996213	-1.9751	0.0800064	1.27759	0.996213	-1.9751	-3.95019	4.88775e-06
rs72822551	0.0537553	-1.42323	0.997453	-1.97613	0.0537553	-1.42323	0.997453	-1.97613	-3.95225	4.8777e-06
rs72822580	0.045028	-1.48373	0.997865	-1.97633	0.045028	-1.48373	0.997865	-1.97633	-3.95266	4.87569e-06
rs34507864	0.0662244	1.34781	0.996864	-1.97687	0.0662244	1.34781	0.996864	-1.97687	-3.95374	4.87043e-06
rs143394671	0.102435	1.1742	0.995157	-1.97905	0.102435	1.1742	0.995157	-1.97905	-3.9581	4.84924e-06
rs72822547	0.053728	-1.41787	0.997454	-1.98396	0.053728	-1.41787	0.997454	-1.98396	-3.96793	4.80183e-06
rs146469548	0.0199985	-1.72803	0.999051	-1.9883	0.0199985	-1.72803	0.999051	-1.9883	-3.9766	4.76037e-06
rs72822540	0.0537716	-1.41344	0.997452	-1.98982	0.0537716	-1.41344	0.997452	-1.98982	-3.97964	4.74595e-06
rs118145062	0.066067	1.33769	0.996871	-1.9916	0.066067	1.33769	0.996871	-1.9916	-3.9832	4.72906e-06
rs117819105	0.0650633	1.3422	0.996918	-1.99317	0.0650633	1.3422	0.996918	-1.99317	-3.98634	4.71422e-06
rs143429732	0.0538435	-1.40963	0.997448	-1.99452	0.0538435	-1.40963	0.997448	-1.99452	-3.98905	4.70147e-06
rs72822577	0.0511931	-1.4267	0.997574	-1.99543	0.0511931	-1.4267	0.997574	-1.99543	-3.99086	4.69298e-06
rs369267512	0.0507168	1.4277	0.997596	-1.99864	0.0507168	1.4277	0.997596	-1.99864	-3.99728	4.66296e-06
rs79126036	0.0125344	1.85051	0.999405	-2.00216	0.0125344	1.85051	0.999405	-2.00216	-4.00432	4.63025e-06
rs144507541	0.0944075	-1.17468	0.995535	-2.01885	0.0944075	-1.17468	0.995535	-2.01885	-4.0377	4.47822e-06
rs145453928	0.0502092	1.4107	0.99762	-2.0277	0.0502092	1.4107	0.99762	-2.0277	-4.05541	4.39962e-06
rs114288609	0.0534012	-1.38848	0.997469	-2.02813	0.0534012	-1.38848	0.997469	-2.02813	-4.05627	4.39583e-06
rs72822541	0.0534012	-1.38848	0.997469	-2.02813	0.0534012	-1.38848	0.997469	-2.02813	-4.05627	4.39583e-06
rs75559355	0.0504083	1.40587	0.997611	-2.03252	0.0504083	1.40587	0.997611	-2.03252	-4.06505	4.35741e-06
rs201465548	0.0452549	-1.43914	0.997855	-2.03886	0.0452549	-1.43914	0.997855	-2.03886	-4.07772	4.30256e-06
rs117798260	0.0650541	1.30609	0.996919	-2.04091	0.0650541	1.30609	0.996919	-2.04091	-4.08181	4.28496e-06
rs72822571	0.045223	-1.43507	0.997856	-2.04505	0.045223	-1.43507	0.997856	-2.04505	-4.0901	4.24961e-06
rs72822562	0.0452366	-1.43399	0.997855	-2.04645	0.0452366	-1.43399	0.997855	-2.04645	-4.09289	4.23775e-06
rs148891343	0.0538175	-1.37025	0.99745	-2.04936	0.0538175	-1.37025	0.99745	-2.04936	-4.09871	4.21315e-06
rs72822537	0.0538175	-1.37025	0.99745	-2.04936	0.0538175	-1.37025	0.99745	-2.04936	-4.09873	4.2131e-06
rs148660648	0.0661256	1.29291	0.996868	-2.04988	0.0661256	1.29291	0.996868	-2.04988	-4.09975	4.20878e-06
rs72822565	0.0452924	-1.43048	0.997853	-2.05084	0.0452924	-1.43048	0.997853	-2.05084	-4.10169	4.20065e-06
rs143965674	0.066103	1.29158	0.996869	-2.05176	0.066103	1.29158	0.996869	-2.05176	-4.10352	4.19295e-06
rs72822568	0.0452872	-1.42945	0.997853	-2.05237	0.0452872	-1.42945	0.997853	-2.05237	-4.10473	4.18787e-06
rs72822567	0.0452872	-1.4288	0.997853	-2.0533	0.0452872	-1.4288	0.997853	-2.0533	-4.1066	4.18007e-06
rs61869969	0.0364936	1.50004	0.998269	-2.05646	0.0364936	1.50004	0.998269	-2.05646	-4.11291	4.15375e-06
rs74354060	0.0658636	1.28679	0.996881	-2.05972	0.0658636	1.28679	0.996881	-2.05972	-4.11944	4.12674e-06
rs114088633	0.0538189	-1.36035	0.99745	-2.06282	0.0538189	-1.36035	0.99745	-2.06282	-4.12565	4.1012e-06
rs72822572	0.0436446	-1.43471	0.997931	-2.06321	0.0436446	-1.43471	0.997931	-2.06321	-4.12641	4.09807e-06
rs72822574	0.0436492	-1.43414	0.99793	-2.06397	0.0436492	-1.43414	0.99793	-2.06397	-4.12795	4.09178e-06
rs114715754	0.0503114	1.38293	0.997615	-2.06538	0.0503114	1.38293	0.997615	-2.06538	-4.13077	4.08025e-06
rs12570676	0.00382885	2.11336	0.999818	-2.07334	0.00382885	2.11336	0.999818	-2.07334	-4.14669	4.01581e-06
rs190517052	0.0685361	-1.25919	0.996754	-2.07502	0.0685361	-1.25919	0.996754	-2.07502	-4.15004	4.00237e-06
rs72822534	0.0538217	-1.34613	0.997449	-2.08199	0.0538217	-1.34613	0.997449	-2.08199	-4.16399	3.94694e-06
rs1409711	0.0148204	1.75976	0.999296	-2.08235	0.0148204	1.75976	0.999296	-2.08235	-4.16469	3.94414e-06
rs201121643	0.0162213	1.7321	0.99923	-2.08558	0.0162213	1.7321	0.99923	-2.08558	-4.17115	3.91875e-06
rs564279240	0.0162213	1.7321	0.99923	-2.08558	0.0162213	1.7321	0.99923	-2.08558	-4.17115	3.91875e-06
rs72822532	0.0538259	-1.34067	0.997449	-2.08928	0.0538259	-1.34067	0.997449	-2.08928	-4.17856	3.88985e-06
rs72822531	0.0538291	-1.33969	0.997449	-2.09055	0.0538291	-1.33969	0.997449	-2.09055	-4.18111	3.87994e-06
rs189723298	0.0393534	1.44903	0.998134	-2.09404	0.0393534	1.44903	0.998134	-2.09404	-4.18808	3.85299e-06
rs10736090	0.0148267	1.75125	0.999296	-2.09706	0.0148267	1.75125	0.999296	-2.09706	-4.19411	3.8298e-06
rs72822529	0.0538092	-1.33366	0.99745	-2.09877	0.0538092	-1.33366	0.99745	-2.09877	-4.19755	3.81667e-06
rs370371759	0.0676234	1.24442	0.996797	-2.1001	0.0676234	1.24442	0.996797	-2.1001	-4.2002	3.80655e-06
rs72822516	0.057672	-1.30354	0.997267	-2.10398	0.057672	-1.30354	0.997267	-2.10398	-4.20796	3.77713e-06
rs140142311	0.0611677	-1.27866	0.997102	-2.1068	0.0611677	-1.27866	0.997102	-2.1068	-4.2136	3.75588e-06
rs112194607	0.0511913	-1.33454	0.997574	-2.12237	0.0511913	-1.33454	0.997574	-2.12237	-4.24475	3.64072e-06
rs72822587	0.0438379	-1.38925	0.997922	-2.12506	0.0438379	-1.38925	0.997922	-2.12506	-4.25013	3.62118e-06
rs72822526	0.0538022	-1.31034	0.99745	-2.12959	0.0538022	-1.31034	0.99745	-2.12959	-4.25919	3.58852e-06
rs144780388	0.0674753	1.22064	0.996804	-2.1304	0.0674753	1.22064	0.996804	-2.1304	-4.26079	3.58276e-06
rs72822557	0.0556332	-1.29659	0.997364	-2.13086	0.0556332	-1.29659	0.997364	-2.13086	-4.26171	3.57947e-06
rs72822552	0.0530648	-1.30633	0.997485	-2.14168	0.0530648	-1.30633	0.997485	-2.14168	-4.28335	3.50284e-06
rs201012466	0.00351462	-2.09963	0.999833	-2.14504	0.00351462	-2.09963	0.999833	-2.14504	-4.29008	3.47936e-06
rs201835257	0.00351462	-2.09963	0.999833	-2.14504	0.00351462	-2.09963	0.999833	-2.14504	-4.29008	3.47936e-06
rs72822525	0.0537739	-1.29754	0.997452	-2.14651	0.0537739	-1.29754	0.997452	-2.14651	-4.29302	3.46915e-06
rs144711667	0.0630688	1.23129	0.997013	-2.15088	0.0630688	1.23129	0.997013	-2.15088	-4.30177	3.43892e-06
rs117833093	0.0507898	1.31373	0.997593	-2.15376	0.0507898	1.31373	0.997593	-2.15376	-4.30753	3.41916e-06
rs75704284	0.0506772	1.31164	0.997598	-2.1576	0.0506772	1.31164	0.997598	-2.1576	-4.31521	3.39301e-06
rs72822524	0.0537906	-1.28672	0.997451	-2.16029	0.0537906	-1.28672	0.997451	-2.16029	-4.32059	3.3748e-06
rs72822559	0.0532599	-1.28956	0.997476	-2.16157	0.0532599	-1.28956	0.997476	-2.16157	-4.32313	3.36622e-06
rs72822558	0.0532566	-1.28908	0.997476	-2.16221	0.0532566	-1.28908	0.997476	-2.16221	-4.32442	3.3619e-06
rs72822554	0.0532368	-1.28868	0.997477	-2.16291	0.0532368	-1.28868	0.997477	-2.16291	-4.32582	3.35719e-06
rs76030646	0.0505422	1.29276	0.997604	-2.18346	0.0505422	1.29276	0.997604	-2.18346	-4.36691	3.22204e-06
rs150048897	0.0635065	1.19277	0.996992	-2.194	0.0635065	1.19277	0.996992	-2.194	-4.388	3.15481e-06
rs72822598	0.0457455	-1.31864	0.997831	-2.19929	0.0457455	-1.31864	0.997831	-2.19929	-4.39859	3.12158e-06
rs138021457	0.0593916	-1.20837	0.997186	-2.20858	0.0593916	-1.20837	0.997186	-2.20858	-4.41717	3.06411e-06
rs116585482	0.0630356	1.17545	0.997014	-2.21814	0.0630356	1.17545	0.997014	-2.21814	-4.43628	3.0061e-06
rs10786216	0.0168045	1.64263	0.999202	-2.21882	0.0168045	1.64263	0.999202	-2.21882	-4.43764	3.00201e-06
rs73323197	0.0298661	1.45555	0.998583	-2.22182	0.0298661	1.45555	0.998583	-2.22182	-4.44363	2.98408e-06
rs4373856	0.0297604	1.45598	0.998588	-2.22295	0.0297604	1.45598	0.998588	-2.22295	-4.44591	2.9773e-06
rs10882593	0.00340335	-2.069	0.999838	-2.22494	0.00340335	-2.069	0.999838	-2.22494	-4.44987	2.96552e-06
rs11188351	0.029873	1.4504	0.998583	-2.22917	0.029873	1.4504	0.998583	-2.22917	-4.45833	2.94054e-06
rs11188327	0.00442589	-2.00056	0.99979	-2.23295	0.00442589	-2.00056	0.99979	-2.23295	-4.4659	2.91837e-06
rs145726848	0.0454521	-1.29522	0.997845	-2.23304	0.0454521	-1.29522	0.997845	-2.23304	-4.46608	2.91784e-06
rs12413990	0.00340557	-2.06411	0.999838	-2.23472	0.00340557	-2.06411	0.999838	-2.23472	-4.46944	2.90807e-06
rs375058700	0.042825	-1.31454	0.997969	-2.23748	0.042825	-1.31454	0.997969	-2.23748	-4.47497	2.89202e-06
rs72822595	0.0448262	-1.29068	0.997875	-2.24579	0.0448262	-1.29068	0.997875	-2.24579	-4.49157	2.84441e-06
rs35890745	0.050116	1.23624	0.997625	-2.25897	0.050116	1.23624	0.997625	-2.25897	-4.51795	2.77036e-06
rs72822564	0.0452336	-1.276	0.997856	-2.26009	0.0452336	-1.276	0.997856	-2.26009	-4.52018	2.76418e-06
rs72822563	0.0452336	-1.27598	0.997856	-2.26012	0.0452336	-1.27598	0.997856	-2.26012	-4.52023	2.76405e-06
rs4918928	0.00340539	-2.04561	0.999838	-2.27276	0.00340539	-2.04561	0.999838	-2.27276	-4.54552	2.69503e-06
rs4244317	0.00383764	2.01533	0.999818	-2.27454	0.00383764	2.01533	0.999818	-2.27454	-4.54907	2.68546e-06
rs75618826	0.0408493	1.3018	0.998063	-2.27761	0.0408493	1.3018	0.998063	-2.27761	-4.55521	2.66902e-06
rs75589680	0.053589	-1.18851	0.99746	-2.2834	0.053589	-1.18851	0.99746	-2.2834	-4.5668	2.63829e-06
rs4367881	0.030308	1.40659	0.998562	-2.28447	0.030308	1.40659	0.998562	-2.28447	-4.56894	2.63265e-06
rs72822599	0.0451495	-1.25318	0.99786	-2.28982	0.0451495	-1.25318	0.99786	-2.28982	-4.57963	2.60464e-06
rs146000329	0.0531999	-1.18611	0.997479	-2.28986	0.0531999	-1.18611	0.997479	-2.28986	-4.57971	2.60443e-06
rs9633700	0.00361232	-2.02251	0.999828	-2.29027	0.00361232	-2.02251	0.999828	-2.29027	-4.58054	2.60227e-06
rs72822593	0.0454385	-1.23102	0.997846	-2.31411	0.0454385	-1.23102	0.997846	-2.31411	-4.62822	2.48111e-06
rs72822594	0.0454466	-1.22816	0.997845	-2.31753	0.0454466	-1.22816	0.997845	-2.31753	-4.63506	2.4642e-06
rs185680134	0.0211918	-1.50405	0.998994	-2.32103	0.0211918	-1.50405	0.998994	-2.32103	-4.64205	2.44703e-06
rs73321243	0.0427741	1.24427	0.997972	-2.32779	0.0427741	1.24427	0.997972	-2.32779	-4.65558	2.41414e-06
rs45447693	0.0120721	1.66795	0.999427	-2.34188	0.0120721	1.66795	0.999427	-2.34188	-4.68376	2.34706e-06
rs149684015	0.0427567	1.22921	0.997973	-2.34659	0.0427567	1.22921	0.997973	-2.34659	-4.69317	2.32508e-06
rs11188255	0.00383986	-1.97579	0.999818	-2.35314	0.00383986	-1.97579	0.999818	-2.35314	-4.70627	2.29482e-06
rs116388913	0.042866	1.21904	0.997968	-2.35774	0.042866	1.21904	0.997968	-2.35774	-4.71548	2.27379e-06
rs116060550	0.0425717	1.21556	0.997981	-2.3654	0.0425717	1.21556	0.997981	-2.3654	-4.73079	2.23924e-06
rs184649601	0.0422105	1.21611	0.997999	-2.36896	0.0422105	1.21611	0.997999	-2.36896	-4.73792	2.22333e-06
rs767615758	0.0432457	-1.2045	0.99795	-2.37093	0.0432457	-1.2045	0.99795	-2.37093	-4.74186	2.2146e-06
rs75439630	0.0303502	1.33731	0.99856	-2.37869	0.0303502	1.33731	0.99856	-2.37869	-4.75737	2.1805e-06
rs4918927	0.00941131	-1.7183	0.999553	-2.38092	0.00941131	-1.7183	0.999553	-2.38092	-4.76184	2.17077e-06
rs73321246	0.0427022	1.20043	0.997975	-2.38211	0.0427022	1.20043	0.997975	-2.38211	-4.76422	2.16562e-06
rs75166855	0.0301866	1.31643	0.998568	-2.40905	0.0301866	1.31643	0.998568	-2.40905	-4.81809	2.05203e-06
rs149287350	0.0380773	1.22484	0.998194	-2.40962	0.0380773	1.22484	0.998194	-2.40962	-4.81924	2.04969e-06
rs141467872	0.0358549	-1.24541	0.998299	-2.41419	0.0358549	-1.24541	0.998299	-2.41419	-4.82838	2.03104e-06
rs11188350	0.0300003	1.30907	0.998577	-2.42178	0.0300003	1.30907	0.998577	-2.42178	-4.84356	2.00043e-06
rs11188352	0.03	1.30881	0.998577	-2.42212	0.03	1.30881	0.998577	-2.42212	-4.84423	1.99909e-06
rs73323194	0.03	1.3082	0.998577	-2.42292	0.03	1.3082	0.998577	-2.42292	-4.84585	1.99587e-06
rs10882597	0.00361858	-1.9525	0.999828	-2.42852	0.00361858	-1.9525	0.999828	-2.42852	-4.85704	1.97365e-06
rs10786209	0.00347086	-1.95857	0.999835	-2.43749	0.00347086	-1.95857	0.999835	-2.43749	-4.87497	1.93858e-06
rs10882596	0.00362162	-1.94729	0.999828	-2.43825	0.00362162	-1.94729	0.999828	-2.43825	-4.8765	1.93561e-06
rs34824270	0.00407092	1.91605	0.999807	-2.44018	0.00407092	1.91605	0.999807	-2.44018	-4.88036	1.92816e-06
rs78761667	0.0338218	-1.24548	0.998396	-2.44316	0.0338218	-1.24548	0.998396	-2.44316	-4.88632	1.9167e-06
rs1327557	0.00361655	-1.94487	0.999828	-2.44368	0.00361655	-1.94487	0.999828	-2.44368	-4.88735	1.91472e-06
rs10882598	0.0036179	-1.94407	0.999828	-2.44503	0.0036179	-1.94407	0.999828	-2.44503	-4.89007	1.90953e-06
rs1327558	0.00361646	-1.94403	0.999828	-2.44532	0.00361646	-1.94403	0.999828	-2.44532	-4.89064	1.90844e-06
rs7088765	0.00362025	-1.94195	0.999828	-2.44884	0.00362025	-1.94195	0.999828	-2.44884	-4.89768	1.89505e-06
rs10882594	0.00362204	-1.94045	0.999828	-2.45149	0.00362204	-1.94045	0.999828	-2.45149	-4.90299	1.88502e-06
rs10882595	0.00362197	-1.94014	0.999828	-2.45211	0.00362197	-1.94014	0.999828	-2.45211	-4.90422	1.8827e-06
rs11432271	0.033303	1.24421	0.99842	-2.45243	0.033303	1.24421	0.99842	-2.45243	-4.90487	1.88148e-06
rs4918932	0.0036201	-1.92866	0.999828	-2.47458	0.0036201	-1.92866	0.999828	-2.47458	-4.94916	1.79997e-06
rs4918933	0.00362014	-1.92855	0.999828	-2.47478	0.00362014	-1.92855	0.999828	-2.47478	-4.94957	1.79923e-06
rs1854338	0.01222	1.58143	0.99942	-2.47629	0.01222	1.58143	0.99942	-2.47629	-4.95259	1.79381e-06
rs10786208	0.00362252	-1.92675	0.999828	-2.47792	0.00362252	-1.92675	0.999828	-2.47792	-4.95584	1.78798e-06
rs45555036	0.0120765	1.58355	0.999427	-2.47884	0.0120765	1.58355	0.999427	-2.47884	-4.95768	1.78469e-06
rs10736088	0.00361974	-1.92629	0.999828	-2.47918	0.00361974	-1.92629	0.999828	-2.47918	-4.95837	1.78347e-06
rs10786207	0.00362294	-1.92522	0.999828	-2.4808	0.00362294	-1.92522	0.999828	-2.4808	-4.96159	1.77772e-06
rs7073515	0.0343198	1.20231	0.998372	-2.48864	0.0343198	1.20231	0.998372	-2.48864	-4.97727	1.75007e-06
rs1385065	0.00383829	-1.90542	0.999818	-2.48988	0.00383829	-1.90542	0.999818	-2.48988	-4.97976	1.74571e-06
rs72820690	0.0211438	-1.38668	0.998996	-2.49163	0.0211438	-1.38668	0.998996	-2.49163	-4.98326	1.73962e-06
rs17453855	0.012058	1.56208	0.999427	-2.51336	0.012058	1.56208	0.999427	-2.51336	-5.02672	1.66564e-06
rs11188323	0.00341093	-1.92364	0.999838	-2.51396	0.00341093	-1.92364	0.999838	-2.51396	-5.02793	1.66363e-06
rs2031765	0.00341064	-1.92328	0.999838	-2.5147	0.00341064	-1.92328	0.999838	-2.5147	-5.02941	1.66117e-06
rs12256704	0.0295871	1.23731	0.998596	-2.51992	0.0295871	1.23731	0.998596	-2.51992	-5.03984	1.64392e-06
rs56155187	0.00881011	-1.65422	0.999582	-2.52188	0.00881011	-1.65422	0.999582	-2.52188	-5.04377	1.63748e-06
rs7077966	0.0034082	1.91679	0.999838	-2.52752	0.0034082	1.91679	0.999838	-2.52752	-5.05503	1.61913e-06
rs111455423	0.0208892	-1.36255	0.999009	-2.53081	0.0208892	-1.36255	0.999009	-2.53081	-5.06163	1.60849e-06
rs6584000	0.00422046	1.83774	0.9998	-2.5691	0.00422046	1.83774	0.9998	-2.5691	-5.1382	1.48992e-06
rs4918929	0.00343063	-1.88841	0.999837	-2.57824	0.00343063	-1.88841	0.999837	-2.57824	-5.15648	1.46294e-06
rs4918936	0.00366659	-1.87069	0.999826	-2.57829	0.00366659	-1.87069	0.999826	-2.57829	-5.15658	1.46278e-06
rs17110556	0.00368541	-1.8601	0.999825	-2.5955	0.00368541	-1.8601	0.999825	-2.5955	-5.191	1.4133e-06
rs3818539	0.0102874	1.55959	0.999511	-2.59649	0.0102874	1.55959	0.999511	-2.59649	-5.19298	1.41051e-06
rs17110702	0.00952617	-1.58379	0.999548	-2.59686	0.00952617	-1.58379	0.999548	-2.59686	-5.19372	1.40946e-06
rs11593722	0.00368608	-1.85924	0.999825	-2.59701	0.00368608	-1.85924	0.999825	-2.59701	-5.19402	1.40904e-06
rs61868670	0.0161107	1.40813	0.999235	-2.59726	0.0161107	1.40813	0.999235	-2.59726	-5.19453	1.40832e-06
rs10786195	0.0042353	-1.82135	0.999799	-2.59733	0.0042353	-1.82135	0.999799	-2.59733	-5.19466	1.40814e-06
rs1536446	0.00340973	1.87812	0.999838	-2.60066	0.00340973	1.87812	0.999838	-2.60066	-5.20132	1.39879e-06
rs10786211	0.00366148	-1.85798	0.999826	-2.60268	0.00366148	-1.85798	0.999826	-2.60268	-5.20536	1.39315e-06
rs6584001	0.00366134	-1.85567	0.999826	-2.60699	0.00366134	-1.85567	0.999826	-2.60699	-5.21398	1.3812e-06
rs732102	0.00364043	-1.85125	0.999827	-2.61805	0.00364043	-1.85125	0.999827	-2.61805	-5.2361	1.35098e-06
rs113374896	0.0282032	1.17547	0.998662	-2.61829	0.0282032	1.17547	0.998662	-2.61829	-5.23658	1.35032e-06
rs4918934	0.00366119	-1.84756	0.999826	-2.62202	0.00366119	-1.84756	0.999826	-2.62202	-5.24405	1.34028e-06
rs732101	0.00363975	-1.84614	0.999827	-2.62759	0.00363975	-1.84614	0.999827	-2.62759	-5.25519	1.32544e-06
rs147257201	0.0165313	-1.36641	0.999215	-2.64224	0.0165313	-1.36641	0.999215	-2.64224	-5.28447	1.28718e-06
rs3740509	0.00879649	-1.57817	0.999582	-2.64552	0.00879649	-1.57817	0.999582	-2.64552	-5.29104	1.27875e-06
rs11188304	0.00879351	-1.5722	0.999582	-2.65509	0.00879351	-1.5722	0.999582	-2.65509	-5.31018	1.25451e-06
rs145133908	0.0234522	1.2119	0.998887	-2.66682	0.0234522	1.2119	0.998887	-2.66682	-5.33364	1.22543e-06
rs116923843	0.0195681	1.28277	0.999071	-2.66881	0.0195681	1.28277	0.999071	-2.66881	-5.33763	1.22055e-06
rs117050392	0.0200976	1.26398	0.999046	-2.67939	0.0200976	1.26398	0.999046	-2.67939	-5.35878	1.195e-06
rs2025849	0.00343267	-1.83342	0.999837	-2.68026	0.00343267	-1.83342	0.999837	-2.68026	-5.36052	1.19293e-06
rs2025850	0.00343223	-1.83225	0.999837	-2.68245	0.00343223	-1.83225	0.999837	-2.68245	-5.3649	1.1877e-06
rs874450	0.00881096	-1.55294	0.999582	-2.68419	0.00881096	-1.55294	0.999582	-2.68419	-5.36838	1.18358e-06
rs11188308	0.0088106	-1.55278	0.999582	-2.68446	0.0088106	-1.55278	0.999582	-2.68446	-5.36892	1.18295e-06
rs35658903	0.00383645	-1.79701	0.999818	-2.69077	0.00383645	-1.79701	0.999818	-2.69077	-5.38155	1.1681e-06
rs12776555	0.00888595	1.52864	0.999578	-2.71737	0.00888595	1.52864	0.999578	-2.71737	-5.43475	1.10758e-06
rs17849168	0.0110759	1.45285	0.999474	-2.72032	0.0110759	1.45285	0.999474	-2.72032	-5.44065	1.10107e-06
rs3818540	0.0110767	1.45212	0.999474	-2.72135	0.0110767	1.45212	0.999474	-2.72135	-5.44269	1.09882e-06
rs7068867	0.0110919	1.45142	0.999473	-2.72168	0.0110919	1.45142	0.999473	-2.72168	-5.44335	1.09809e-06
rs117481222	0.0164658	-1.30741	0.999218	-2.72304	0.0164658	-1.30741	0.999218	-2.72304	-5.44608	1.0951e-06
rs28419260	0.00887479	1.52197	0.999579	-2.72817	0.00887479	1.52197	0.999579	-2.72817	-5.45634	1.08392e-06
rs11188349	0.0066453	-1.61372	0.999684	-2.72885	0.0066453	-1.61372	0.999684	-2.72885	-5.45771	1.08244e-06
rs61868671	0.0190142	1.2464	0.999097	-2.72908	0.0190142	1.2464	0.999097	-2.72908	-5.45816	1.08195e-06
rs11188338	0.00647351	-1.62064	0.999693	-2.73073	0.00647351	-1.62064	0.999693	-2.73073	-5.46147	1.07838e-06
rs4918944	0.00887652	1.51813	0.999578	-2.73391	0.00887652	1.51813	0.999578	-2.73391	-5.46783	1.07154e-06
rs4918947	0.00888976	1.50992	0.999578	-2.74559	0.00888976	1.50992	0.999578	-2.74559	-5.49117	1.04682e-06
rs749176	0.00887684	1.50881	0.999578	-2.74799	0.00887684	1.50881	0.999578	-2.74799	-5.49597	1.0418e-06
rs10450393	0.0034577	-1.78208	0.999836	-2.76942	0.0034577	-1.78208	0.999836	-2.76942	-5.53885	9.98082e-07
rs11188356	0.0196465	-1.19265	0.999067	-2.77825	0.0196465	-1.19265	0.999067	-2.77825	-5.5565	9.80612e-07
rs12765981	0.00504579	1.66389	0.99976	-2.7842	0.00504579	1.66389	0.99976	-2.7842	-5.56839	9.69025e-07
rs59681640	0.0169174	1.24005	0.999197	-2.79527	0.0169174	1.24005	0.999197	-2.79527	-5.59054	9.47798e-07
rs67867652	0.0189864	1.1919	0.999099	-2.7962	0.0189864	1.1919	0.999099	-2.7962	-5.5924	9.46041e-07
rs10786220	0.00754746	1.52792	0.999642	-2.8	0.00754746	1.52792	0.999642	-2.8	-5.59999	9.38879e-07
rs4918908	0.00382953	-1.73393	0.999818	-2.80302	0.00382953	-1.73393	0.999818	-2.80302	-5.60604	9.33221e-07
rs79587021	0.0120203	1.3512	0.999429	-2.82191	0.0120203	1.3512	0.999429	-2.82191	-5.64382	8.98618e-07
rs11188250	0.0038329	-1.71357	0.999818	-2.83766	0.0038329	-1.71357	0.999818	-2.83766	-5.67532	8.70754e-07
rs117818945	0.0178559	1.1813	0.999152	-2.83939	0.0178559	1.1813	0.999152	-2.83939	-5.67877	8.67753e-07
rs12772243	0.00886418	1.4465	0.999579	-2.84073	0.00886418	1.4465	0.999579	-2.84073	-5.68147	8.65417e-07
rs58140424	0.003835	-1.70626	0.999818	-2.8499	0.003835	-1.70626	0.999818	-2.8499	-5.69979	8.49706e-07
rs1410060	0.0109638	1.35611	0.999479	-2.8612	0.0109638	1.35611	0.999479	-2.8612	-5.7224	8.30714e-07
rs45605435	0.0111058	1.34852	0.999473	-2.86504	0.0111058	1.34852	0.999473	-2.86504	-5.73008	8.24352e-07
rs4918905	0.00382662	-1.69605	0.999818	-2.86835	0.00382662	-1.69605	0.999818	-2.86835	-5.7367	8.18913e-07
rs4918935	0.00369211	-1.7056	0.999825	-2.86998	0.00369211	-1.7056	0.999825	-2.86998	-5.73997	8.16244e-07
rs1410595	0.00407472	1.67517	0.999806	-2.87215	0.00407472	1.67517	0.999806	-2.87215	-5.7443	8.12717e-07
rs12775067	0.00383561	-1.69299	0.999818	-2.87235	0.00383561	-1.69299	0.999818	-2.87235	-5.74471	8.12385e-07
rs2296961	0.00382801	-1.6763	0.999818	-2.90147	0.00382801	-1.6763	0.999818	-2.90147	-5.80294	7.66432e-07
rs57743990	0.00397753	-1.66128	0.999811	-2.90738	0.00397753	-1.66128	0.999811	-2.90738	-5.81476	7.57422e-07
rs7094148	0.00668771	-1.49675	0.999682	-2.90752	0.00668771	-1.49675	0.999682	-2.90752	-5.81505	7.57203e-07
rs139781417	0.00745783	1.4579	0.999646	-2.91047	0.00745783	1.4579	0.999646	-2.91047	-5.82094	7.52755e-07
rs12244553	0.0088903	1.38938	0.999578	-2.92024	0.0088903	1.38938	0.999578	-2.92024	-5.84047	7.38197e-07
rs1887225	0.00813831	1.41975	0.999613	-2.92173	0.00813831	1.41975	0.999613	-2.92173	-5.84346	7.35992e-07
rs10882591	0.0111298	-1.30418	0.999471	-2.92274	0.0111298	-1.30418	0.999471	-2.92274	-5.84548	7.34507e-07
rs7894499	0.00813768	1.41801	0.999614	-2.92424	0.00813768	1.41801	0.999614	-2.92424	-5.84848	7.3231e-07
rs1926817	0.00813866	1.41667	0.999613	-2.92607	0.00813866	1.41667	0.999613	-2.92607	-5.85215	7.29627e-07
rs2148893	0.00669222	-1.48297	0.999682	-2.92771	0.00669222	-1.48297	0.999682	-2.92771	-5.85542	7.27241e-07
rs12240292	0.00888512	1.38005	0.999578	-2.93343	0.00888512	1.38005	0.999578	-2.93343	-5.86686	7.1897e-07
rs4918906	0.00411874	-1.62805	0.999804	-2.94459	0.00411874	-1.62805	0.999804	-2.94459	-5.88918	7.03102e-07
rs815244	0.014632	-1.1736	0.999305	-2.94783	0.014632	-1.1736	0.999305	-2.94783	-5.89566	6.98558e-07
rs35497513	0.00382711	-1.64324	0.999818	-2.95644	0.00382711	-1.64324	0.999818	-2.95644	-5.91287	6.8664e-07
rs11594748	0.00382948	-1.63432	0.999818	-2.97076	0.00382948	-1.63432	0.999818	-2.97076	-5.94151	6.67254e-07
rs12247017	0.00887905	1.35174	0.999578	-2.97242	0.00887905	1.35174	0.999578	-2.97242	-5.94485	6.65031e-07
rs56010727	0.00405944	-1.61529	0.999807	-2.97253	0.00405944	-1.61529	0.999807	-2.97253	-5.94505	6.64894e-07
rs7909386	0.00816267	1.37426	0.999612	-2.98376	0.00816267	1.37426	0.999612	-2.98376	-5.96752	6.50126e-07
rs7098378	0.00816518	1.37142	0.999612	-2.98751	0.00816518	1.37142	0.999612	-2.98751	-5.97502	6.45267e-07
rs7098531	0.00816531	1.37106	0.999612	-2.98799	0.00816531	1.37106	0.999612	-2.98799	-5.97597	6.44652e-07
rs7092277	0.00817006	1.3609	0.999612	-3.00156	0.00817006	1.3609	0.999612	-3.00156	-6.00313	6.27381e-07
rs12254671	0.00879958	1.33024	0.999582	-3.00573	0.00879958	1.33024	0.999582	-3.00573	-6.01146	6.22173e-07
rs1887227	0.00811543	1.35793	0.999615	-3.00896	0.00811543	1.35793	0.999615	-3.00896	-6.01792	6.18171e-07
rs45444597	0.0109284	1.2425	0.999481	-3.01035	0.0109284	1.2425	0.999481	-3.01035	-6.0207	6.16452e-07
rs10786224	0.00833722	1.33521	0.999604	-3.02607	0.00833722	1.33521	0.999604	-3.02607	-6.05214	5.97372e-07
rs35777379	0.00526224	1.49376	0.99975	-3.03175	0.00526224	1.49376	0.99975	-3.03175	-6.0635	5.90623e-07
rs17526000	0.011685	1.18427	0.999445	-3.04755	0.011685	1.18427	0.999445	-3.04755	-6.09509	5.72256e-07
rs72824506	0.00642203	-1.41307	0.999695	-3.04949	0.00642203	-1.41307	0.999695	-3.04949	-6.09897	5.70041e-07
rs3793747	0.0114591	-1.17486	0.999456	-3.06839	0.0114591	-1.17486	0.999456	-3.06839	-6.13678	5.4889e-07
rs10882589	0.0100904	-1.21421	0.999521	-3.08492	0.0100904	-1.21421	0.999521	-3.08492	-6.16984	5.3104e-07
rs12783709	0.00508282	1.46301	0.999759	-3.09452	0.00508282	1.46301	0.999759	-3.09452	-6.18904	5.20944e-07
rs34976996	0.00486399	1.47199	0.999769	-3.10334	0.00486399	1.47199	0.999769	-3.10334	-6.20668	5.11837e-07
rs1359723	0.00861693	1.25762	0.999591	-3.11013	0.00861693	1.25762	0.999591	-3.11013	-6.22027	5.04927e-07
rs56017357	0.00401479	-1.52659	0.999809	-3.11737	0.00401479	-1.52659	0.999809	-3.11737	-6.23475	4.97669e-07
rs4917688	0.00352321	-1.56535	0.999833	-3.12272	0.00352321	-1.56535	0.999833	-3.12272	-6.24545	4.92372e-07
rs17456435	0.00532356	1.42466	0.999747	-3.12676	0.00532356	1.42466	0.999747	-3.12676	-6.25353	4.88409e-07
rs4918931	0.00352241	-1.55717	0.999833	-3.13561	0.00352241	-1.55717	0.999833	-3.13561	-6.27121	4.79848e-07
rs7086989	0.00335513	-1.57051	0.999841	-3.13906	0.00335513	-1.57051	0.999841	-3.13906	-6.27812	4.76544e-07
rs2182588	0.00417766	1.49784	0.999802	-3.14096	0.00417766	1.49784	0.999802	-3.14096	-6.28192	4.74736e-07
rs1575948	0.00329649	-1.56984	0.999843	-3.14892	0.00329649	-1.56984	0.999843	-3.14892	-6.29783	4.67242e-07
rs12765494	0.00858817	1.21852	0.999592	-3.1602	0.00858817	1.21852	0.999592	-3.1602	-6.3204	4.56816e-07
rs12769370	0.00508825	1.40662	0.999758	-3.17488	0.00508825	1.40662	0.999758	-3.17488	-6.34976	4.43597e-07
rs4918926	0.00842089	-1.20499	0.9996	-3.18642	0.00842089	-1.20499	0.9996	-3.18642	-6.37283	4.33481e-07
rs10748631	0.00333875	-1.53962	0.999841	-3.18954	0.00333875	-1.53962	0.999841	-3.18954	-6.37907	4.30785e-07
rs10882599	0.00706768	-1.26479	0.999664	-3.20011	0.00706768	-1.26479	0.999664	-3.20011	-6.40021	4.21773e-07
rs7089696	0.00706946	-1.26408	0.999664	-3.20087	0.00706946	-1.26408	0.999664	-3.20087	-6.40175	4.21127e-07
rs45550034	0.00504662	1.38821	0.99976	-3.20471	0.00504662	1.38821	0.99976	-3.20471	-6.40941	4.17911e-07
rs11188312	0.00671726	-1.27932	0.999681	-3.20702	0.00671726	-1.27932	0.999681	-3.20702	-6.41405	4.15978e-07
rs7896622	0.00871082	1.17171	0.999586	-3.20903	0.00871082	1.17171	0.999586	-3.20903	-6.41806	4.14311e-07
rs10786223	0.00799928	1.20447	0.99962	-3.2127	0.00799928	1.20447	0.99962	-3.2127	-6.4254	4.11284e-07
rs12571786	0.00753271	-1.22357	0.999642	-3.21954	0.00753271	-1.22357	0.999642	-3.21954	-6.43908	4.05696e-07
rs3737015	0.00558734	1.33167	0.999735	-3.23073	0.00558734	1.33167	0.999735	-3.23073	-6.46146	3.96717e-07
rs10786194	0.00560305	1.3205	0.999734	-3.24413	0.00560305	1.3205	0.999734	-3.24413	-6.48825	3.86228e-07
rs11188324	0.00704705	-1.21968	0.999665	-3.25758	0.00704705	-1.21968	0.999665	-3.25758	-6.51517	3.75972e-07
rs58005959	0.00603511	1.27946	0.999713	-3.26035	0.00603511	1.27946	0.999713	-3.26035	-6.5207	3.73899e-07
rs10786210	0.00704606	-1.21639	0.999665	-3.26165	0.00704606	-1.21639	0.999665	-3.26165	-6.52331	3.72923e-07
rs35830045	0.00516178	1.33445	0.999755	-3.2666	0.00516178	1.33445	0.999755	-3.2666	-6.5332	3.69254e-07
rs2031766	0.00696327	-1.21038	0.999669	-3.27485	0.00696327	-1.21038	0.999669	-3.27485	-6.54969	3.63212e-07
rs1536555	0.00350026	-1.4628	0.999834	-3.28123	0.00350026	-1.4628	0.999834	-3.28123	-6.56246	3.58606e-07
rs12767115	0.00555824	1.29253	0.999736	-3.28467	0.00555824	1.29253	0.999736	-3.28467	-6.56934	3.56146e-07
rs17849163	0.00555705	1.28668	0.999736	-3.29233	0.00555705	1.28668	0.999736	-3.29233	-6.58466	3.50732e-07
rs76443986	0.00702351	-1.18295	0.999666	-3.30336	0.00702351	-1.18295	0.999666	-3.30336	-6.60672	3.43078e-07
rs11188322	0.00695444	-1.17706	0.99967	-3.31525	0.00695444	-1.17706	0.99967	-3.31525	-6.6305	3.35017e-07
rs4110518	0.00463649	1.32357	0.99978	-3.33468	0.00463649	1.32357	0.99978	-3.33468	-6.66936	3.22247e-07
rs76163375	0.00504594	1.28714	0.99976	-3.33994	0.00504594	1.28714	0.99976	-3.33994	-6.67987	3.18878e-07
rs1887228	0.00327036	-1.44392	0.999845	-3.34261	0.00327036	-1.44392	0.999845	-3.34261	-6.68523	3.17175e-07
rs12777195	0.00341806	1.42398	0.999838	-3.34913	0.00341806	1.42398	0.999838	-3.34913	-6.69826	3.13068e-07
rs12778837	0.00341806	1.42398	0.999838	-3.34913	0.00341806	1.42398	0.999838	-3.34913	-6.69826	3.13068e-07
rs12778797	0.00341736	1.42069	0.999838	-3.35391	0.00341736	1.42069	0.999838	-3.35391	-6.70782	3.1009e-07
rs2860999	0.00341712	1.42063	0.999838	-3.35403	0.00341712	1.42063	0.999838	-3.35403	-6.70805	3.10018e-07
rs12778613	0.00341709	1.42035	0.999838	-3.35443	0.00341709	1.42035	0.999838	-3.35443	-6.70885	3.0977e-07
rs11188256	0.00472391	1.30055	0.999776	-3.35555	0.00472391	1.30055	0.999776	-3.35555	-6.7111	3.09075e-07
rs2026680	0.00341937	1.41895	0.999838	-3.35608	0.00341937	1.41895	0.999838	-3.35608	-6.71217	3.08745e-07
rs11188245	0.00341757	1.41895	0.999838	-3.35635	0.00341757	1.41895	0.999838	-3.35635	-6.7127	3.08579e-07
rs12771349	0.00341703	1.4188	0.999838	-3.35664	0.00341703	1.4188	0.999838	-3.35664	-6.71327	3.08403e-07
rs7909905	0.00341781	1.41819	0.999838	-3.35739	0.00341781	1.41819	0.999838	-3.35739	-6.71477	3.07941e-07
rs2026681	0.00341962	1.41702	0.999838	-3.35879	0.00341962	1.41702	0.999838	-3.35879	-6.71758	3.07077e-07
rs2901833	0.00341615	1.41707	0.999838	-3.35922	0.00341615	1.41707	0.999838	-3.35922	-6.71844	3.06814e-07
rs45613733	0.00341655	1.41598	0.999838	-3.3607	0.00341655	1.41598	0.999838	-3.3607	-6.7214	3.05906e-07
rs2860998	0.00341533	1.41602	0.999838	-3.36083	0.00341533	1.41602	0.999838	-3.36083	-6.72165	3.0583e-07
rs7910040	0.00341836	1.4156	0.999838	-3.36099	0.00341836	1.4156	0.999838	-3.36099	-6.72197	3.05732e-07
rs11188244	0.00341669	1.41501	0.999838	-3.36206	0.00341669	1.41501	0.999838	-3.36206	-6.72412	3.05075e-07
rs11188243	0.00341699	1.41199	0.999838	-3.36628	0.00341699	1.41199	0.999838	-3.36628	-6.73256	3.02512e-07
rs11498700	0.00567413	-1.21915	0.99973	-3.36649	0.00567413	-1.21915	0.99973	-3.36649	-6.73298	3.02384e-07
rs35704711	0.00341886	1.41159	0.999838	-3.36658	0.00341886	1.41159	0.999838	-3.36658	-6.73315	3.02333e-07
rs4388808	0.00567471	-1.21705	0.99973	-3.369	0.00567471	-1.21705	0.99973	-3.369	-6.73799	3.00874e-07
rs1049961	0.00342368	1.40271	0.999837	-3.37836	0.00342368	1.40271	0.999837	-3.37836	-6.75672	2.95291e-07
rs7912686	0.00492598	1.25412	0.999766	-3.39391	0.00492598	1.25412	0.999766	-3.39391	-6.78782	2.86248e-07
rs200795231	0.00384952	-1.33915	0.999817	-3.4069	0.00384952	-1.33915	0.999817	-3.4069	-6.8138	2.78907e-07
rs35764302	0.004125	-1.309	0.999804	-3.41228	0.004125	-1.309	0.999804	-3.41228	-6.82455	2.75924e-07
rs370419125	0.00359668	1.35536	0.999829	-3.41901	0.00359668	1.35536	0.999829	-3.41901	-6.83803	2.72232e-07
rs7085265	0.00461481	1.24941	0.999781	-3.43241	0.00461481	1.24941	0.999781	-3.43241	-6.86482	2.65036e-07
rs202211780	0.00504576	1.2126	0.99976	-3.4331	0.00504576	1.2126	0.99976	-3.4331	-6.86621	2.64667e-07
rs943338	0.00340161	1.35903	0.999838	-3.44191	0.00340161	1.35903	0.999838	-3.44191	-6.88381	2.60048e-07
rs4146490	0.0034017	1.35864	0.999838	-3.44241	0.0034017	1.35864	0.999838	-3.44241	-6.88483	2.59784e-07
rs6584007	0.00340169	1.35863	0.999838	-3.44243	0.00340169	1.35863	0.999838	-3.44243	-6.88487	2.59774e-07
rs4244316	0.00340169	1.35861	0.999838	-3.44246	0.00340169	1.35861	0.999838	-3.44246	-6.88492	2.5976e-07
rs4146492	0.0034017	1.35857	0.999838	-3.44251	0.0034017	1.35857	0.999838	-3.44251	-6.88503	2.59732e-07
rs4146491	0.00340175	1.35836	0.999838	-3.44279	0.00340175	1.35836	0.999838	-3.44279	-6.88559	2.59588e-07
rs4146489	0.00340168	1.35805	0.999838	-3.44322	0.00340168	1.35805	0.999838	-3.44322	-6.88644	2.59366e-07
rs7897540	0.00340172	1.35781	0.999838	-3.44355	0.00340172	1.35781	0.999838	-3.44355	-6.88709	2.59197e-07
rs10882609	0.00340177	1.35737	0.999838	-3.44414	0.00340177	1.35737	0.999838	-3.44414	-6.88827	2.58891e-07
rs35856146	0.00423093	1.27159	0.999799	-3.44786	0.00423093	1.27159	0.999799	-3.44786	-6.89572	2.56972e-07
rs4917695	0.00340015	1.34368	0.999838	-3.46286	0.00340015	1.34368	0.999838	-3.46286	-6.92572	2.49376e-07
rs11188343	0.00340032	1.34237	0.999838	-3.4646	0.00340032	1.34237	0.999838	-3.4646	-6.92919	2.48512e-07
rs61868708	0.00505275	1.18362	0.99976	-3.46712	0.00505275	1.18362	0.99976	-3.46712	-6.93424	2.4726e-07
rs1952232	0.00340251	1.34022	0.999838	-3.46716	0.00340251	1.34022	0.999838	-3.46716	-6.93431	2.47242e-07
rs7896439	0.0043031	1.24435	0.999796	-3.47366	0.0043031	1.24435	0.999796	-3.47366	-6.94733	2.44045e-07
rs1326934	0.00340105	1.319	0.999838	-3.49558	0.00340105	1.319	0.999838	-3.49558	-6.99116	2.3358e-07
rs1575269	0.0047131	1.18857	0.999776	-3.49603	0.0047131	1.18857	0.999776	-3.49603	-6.99206	2.33369e-07
rs12415527	0.00345369	1.28658	0.999836	-3.53013	0.00345369	1.28658	0.999836	-3.53013	-7.06026	2.17984e-07
rs75522289	0.00419414	1.19509	0.999801	-3.54656	0.00419414	1.19509	0.999801	-3.54656	-7.09312	2.10937e-07
rs7910217	0.00374171	1.23777	0.999822	-3.5517	0.00374171	1.23777	0.999822	-3.5517	-7.1034	2.08779e-07
rs1887226	0.00413626	-1.19423	0.999804	-3.55452	0.00413626	-1.19423	0.999804	-3.55452	-7.10905	2.07604e-07
rs1571131	0.00328634	-1.27785	0.999844	-3.56615	0.00328634	-1.27785	0.999844	-3.56615	-7.13229	2.02835e-07
rs10882603	0.00328884	-1.27308	0.999844	-3.57185	0.00328884	-1.27308	0.999844	-3.57185	-7.14369	2.00535e-07
rs78863429	0.00366975	-1.19441	0.999826	-3.61413	0.00366975	-1.19441	0.999826	-3.61413	-7.22825	1.84275e-07
rs7088546	0.00345079	1.21539	0.999836	-3.61959	0.00345079	1.21539	0.999836	-3.61959	-7.23918	1.82272e-07
rs10882604	0.00328956	-1.22512	0.999844	-3.63163	0.00328956	-1.22512	0.999844	-3.63163	-7.26327	1.77934e-07

## Sheet: IQGAP1
snp	V.df1	z.df1	r.df1	lABF.df1	V.df2	z.df2	r.df2	lABF.df2	internal.sum.lABF	SNP.PP.H4
rs79758034	0.0860049	3.69313	0.996067	4.02361	0.0860049	3.69313	0.996067	4.02361	8.04723	0.629368
rs183176301	0.318058	3.29587	0.985608	3.23268	0.318058	3.29587	0.985608	3.23268	6.46536	0.129392
rs199948601	6.39367	3.2006	0.773075	3.21805	6.39367	3.2006	0.773075	3.21805	6.4361	0.125661
rs528245274	1.16612	2.90667	0.949183	2.51994	1.16612	2.90667	0.949183	2.51994	5.03988	0.0311051
rs138354057	0.0959395	3.09176	0.995615	2.04377	0.0959395	3.09176	0.995615	2.04377	4.08755	0.0120016
rs541057302	3.5226	2.6492	0.860789	2.03474	3.5226	2.6492	0.860789	2.03474	4.06948	0.0117867
rs183816519	0.13939	2.9524	0.993641	1.80167	0.13939	2.9524	0.993641	1.80167	3.60334	0.00739521
rs146545629	0.209256	-2.87995	0.990484	1.78019	0.209256	-2.87995	0.990484	1.78019	3.56038	0.00708425
rs142519469	4.24789	2.30785	0.836804	1.32209	4.24789	2.30785	0.836804	1.32209	2.64417	0.00283393
rs186715491	0.0493537	2.93392	0.997739	1.24817	0.0493537	2.93392	0.997739	1.24817	2.49634	0.00244447
rs148476744	0.0916769	-2.81196	0.995809	1.19963	0.0916769	-2.81196	0.995809	1.19963	2.39925	0.0022183
rs151185145	0.083253	-2.79022	0.996192	1.09246	0.083253	-2.79022	0.996192	1.09246	2.18492	0.00179035
rs1256826	0.00987768	3.14211	0.999547	1.08468	0.00987768	3.14211	0.999547	1.08468	2.16937	0.00176272
rs555142105	0.136156	2.68433	0.993788	1.03981	0.136156	2.68433	0.993788	1.03981	2.07962	0.00161141
rs143161463	0.102814	-2.7162	0.995302	0.991249	0.102814	-2.7162	0.995302	0.991249	1.9825	0.00146227
rs566183307	0.171396	-2.62128	0.992193	0.982393	0.171396	-2.62128	0.992193	0.982393	1.96479	0.00143659
rs61738864	3.17659	2.12871	0.872723	0.946637	3.17659	2.12871	0.872723	0.946637	1.89327	0.00133745
rs138885023	0.048731	2.78112	0.997768	0.806313	0.048731	2.78112	0.997768	0.806313	1.61263	0.00101017
rs74409574	0.113513	2.62778	0.994816	0.803675	0.113513	2.62778	0.994816	0.803675	1.60735	0.00100485
rs147165247	0.0457207	2.7908	0.997905	0.801943	0.0457207	2.7908	0.997905	0.801943	1.60389	0.00100138
rs1271593	0.0100014	3.04549	0.999541	0.792091	0.0100014	3.04549	0.999541	0.792091	1.58418	0.000981839
rs183693866	0.0885176	-2.65518	0.995953	0.755883	0.0885176	-2.65518	0.995953	0.755883	1.51177	0.000913251
rs372378482	5.74192	1.95829	0.791381	0.733809	5.74192	1.95829	0.791381	0.733809	1.46762	0.000873809
rs150680240	0.10005	-2.61709	0.995428	0.715066	0.10005	-2.61709	0.995428	0.715066	1.43013	0.000841662
rs148224263	0.103879	-2.59932	0.995253	0.687035	0.103879	-2.59932	0.995253	0.687035	1.37407	0.000795774
rs559053912	35.7671	2.14515	0.378489	0.63304	35.7671	2.14515	0.378489	0.63304	1.26608	0.000714316
rs138171173	0.10323	-2.56773	0.995283	0.602765	0.10323	-2.56773	0.995283	0.602765	1.20553	0.000672347
rs779349877	12.0396	1.85339	0.644022	0.589682	12.0396	1.85339	0.644022	0.589682	1.17936	0.000654982
rs139298856	0.051392	2.68909	0.997646	0.581254	0.051392	2.68909	0.997646	0.581254	1.16251	0.000644035
rs556577644	5.37623	1.81306	0.802037	0.508386	5.37623	1.81306	0.802037	0.508386	1.01677	0.000556695
rs375879354	14.4854	1.78586	0.600589	0.498846	14.4854	1.78586	0.600589	0.498846	0.997692	0.000546174
rs141699293	0.0827828	-2.5629	0.996214	0.483611	0.0827828	-2.5629	0.996214	0.483611	0.967222	0.000529783
rs185541136	9.51087	1.75415	0.696064	0.475442	9.51087	1.75415	0.696064	0.475442	0.950883	0.000521197
rs369165426	0.093177	-2.53243	0.99574	0.463652	0.093177	-2.53243	0.99574	0.463652	0.927303	0.000509051
rs113041916	0.0841876	2.55162	0.99615	0.463025	0.0841876	2.55162	0.99615	0.463025	0.92605	0.000508414
rs142816010	9.02696	1.73706	0.706998	0.452856	9.02696	1.73706	0.706998	0.452856	0.905713	0.000498178
rs151327518	0.0463778	-2.65519	0.997875	0.440472	0.0463778	-2.65519	0.997875	0.440472	0.880945	0.000485991
rs1256830	0.0110229	2.91023	0.999494	0.437902	0.0110229	2.91023	0.999494	0.437902	0.875804	0.000483499
rs146860854	0.157154	2.41424	0.992837	0.424019	0.157154	2.41424	0.992837	0.424019	0.848038	0.000470259
rs575070040	7.82075	1.71338	0.735806	0.414502	7.82075	1.71338	0.735806	0.414502	0.829004	0.000461392
rs143635758	2.91054	1.80803	0.882127	0.372749	2.91054	1.80803	0.882127	0.372749	0.745497	0.000424428
rs201785929	0.171586	-2.37199	0.992184	0.365384	0.171586	-2.37199	0.992184	0.365384	0.730768	0.000418222
rs200690226	19.3868	1.66624	0.529084	0.357923	19.3868	1.66624	0.529084	0.357923	0.715847	0.000412028
rs140205654	1.79447	1.8772	0.923886	0.340073	1.79447	1.8772	0.923886	0.340073	0.680146	0.000397578
rs554935531	45.144	1.80739	0.325459	0.334718	45.144	1.80739	0.325459	0.334718	0.669436	0.000393343
rs142224088	0.0864772	-2.49512	0.996045	0.334045	0.0864772	-2.49512	0.996045	0.334045	0.668089	0.000392813
rs140173111	83.5294	2.06526	0.206831	0.325237	83.5294	2.06526	0.206831	0.325237	0.650474	0.000385954
rs974801365	1.05991	1.93134	0.953597	0.243293	1.05991	1.93134	0.953597	0.243293	0.486585	0.000327612
rs141338174	0.213356	2.25761	0.9903	0.205874	0.213356	2.25761	0.9903	0.205874	0.411748	0.000303989
rs181299263	0.146501	2.3267	0.993319	0.184433	0.146501	2.3267	0.993319	0.184433	0.368865	0.000291229
rs534873006	0.176283	-2.27921	0.991972	0.164146	0.176283	-2.27921	0.991972	0.164146	0.328292	0.00027965
rs2229035	181.813	1.93135	0.106985	0.142956	181.813	1.93135	0.106985	0.142956	0.285913	0.000268046
rs138822670	0.137476	2.32169	0.993728	0.142386	0.137476	2.32169	0.993728	0.142386	0.284772	0.00026774
rs145969980	0.0494413	2.49901	0.997735	0.0703061	0.0494413	2.49901	0.997735	0.0703061	0.140612	0.000231796
rs28385141	466.53	1.78515	0.0446058	0.0482581	466.53	1.78515	0.0446058	0.0482581	0.0965161	0.000221797
rs144627431	0.963963	1.83971	0.95762	0.0400188	0.963963	1.83971	0.95762	0.0400188	0.0800375	0.000218172
rs552203159	1.34715	1.75136	0.941754	0.0227623	1.34715	1.75136	0.941754	0.0227623	0.0455246	0.00021077
rs189798804	1325.4	1.66174	0.0161682	0.014173	1325.4	1.66174	0.0161682	0.014173	0.028346	0.000207181
rs186527489	10008.8	1.73691	0.00217151	0.00218862	10008.8	1.73691	0.00217151	0.00218862	0.00437723	0.000202274
rs138596450	0.914586	1.81257	0.959703	-0.0292355	0.914586	1.81257	0.959703	-0.0292355	-0.0584709	0.000189953
rs557662647	0.112409	2.28626	0.994866	-0.0358414	0.112409	2.28626	0.994866	-0.0358414	-0.0716828	0.000187459
rs143203850	0.131964	2.24462	0.993978	-0.0521669	0.131964	2.24462	0.993978	-0.0521669	-0.104334	0.000181438
rs181124077	0.172372	2.17667	0.992148	-0.0731728	0.172372	2.17667	0.992148	-0.0731728	-0.146346	0.000173973
rs150769088	0.0961521	-2.28954	0.995605	-0.104166	0.0961521	-2.28954	0.995605	-0.104166	-0.208332	0.000163516
rs4932155	0.00365064	-2.90923	0.999832	-0.115947	0.00365064	-2.90923	0.999832	-0.115947	-0.231895	0.000159708
rs190864918	0.127578	2.22048	0.994177	-0.122055	0.127578	2.22048	0.994177	-0.122055	-0.24411	0.000157769
rs2655476	0.00999478	2.7022	0.999541	-0.194351	0.00999478	2.7022	0.999541	-0.194351	-0.388703	0.00013653
rs199651139	0.0621819	2.33616	0.997153	-0.209756	0.0621819	2.33616	0.997153	-0.209756	-0.419513	0.000132387
rs138111870	0.135325	2.15222	0.993826	-0.241931	0.135325	2.15222	0.993826	-0.241931	-0.483862	0.000124137
rs8038370	0.0438354	2.38902	0.997992	-0.257225	0.0438354	2.38902	0.997992	-0.257225	-0.51445	0.000120397
rs2352051	0.00348657	-2.8662	0.99984	-0.263139	0.00348657	-2.8662	0.99984	-0.263139	-0.526279	0.000118981
rs146145539	0.166928	2.08462	0.992395	-0.28315	0.166928	2.08462	0.992395	-0.28315	-0.566301	0.000114313
rs529261376	0.162109	2.08688	0.992613	-0.292532	0.162109	2.08688	0.992613	-0.292532	-0.585063	0.000112189
rs146882643	0.04374	2.36206	0.997996	-0.322203	0.04374	2.36206	0.997996	-0.322203	-0.644406	0.000105725
rs138800142	0.0679306	-2.26527	0.996891	-0.328981	0.0679306	-2.26527	0.996891	-0.328981	-0.657961	0.000104301
rs146010728	0.484259	1.79713	0.978251	-0.334375	0.484259	1.79713	0.978251	-0.334375	-0.66875	0.000103182
rs188970729	0.34041	1.88108	0.984612	-0.345082	0.34041	1.88108	0.984612	-0.345082	-0.690163	0.000100996
rs72758611	0.0224314	2.48552	0.998971	-0.353963	0.0224314	2.48552	0.998971	-0.353963	-0.707927	9.92179e-05
rs7171721	0.00347211	-2.82038	0.999841	-0.395458	0.00347211	-2.82038	0.999841	-0.395458	-0.790916	9.13162e-05
rs117328778	0.0468259	2.31342	0.997855	-0.402058	0.0468259	2.31342	0.997855	-0.402058	-0.804115	9.01189e-05
rs117565273	0.0193457	2.49244	0.999113	-0.410244	0.0193457	2.49244	0.999113	-0.410244	-0.820487	8.86555e-05
rs138399745	0.375048	1.81373	0.983073	-0.422451	0.375048	1.81373	0.983073	-0.422451	-0.844902	8.65172e-05
rs28415430	0.0837061	-2.17068	0.996172	-0.435773	0.0837061	-2.17068	0.996172	-0.435773	-0.871545	8.42425e-05
rs34349812	0.00753429	2.66448	0.999654	-0.436339	0.00753429	2.66448	0.999654	-0.436339	-0.872679	8.41471e-05
rs8023880	0.00753495	2.66176	0.999654	-0.443537	0.00753495	2.66176	0.999654	-0.443537	-0.887075	8.29444e-05
rs7166908	0.00348214	-2.80173	0.99984	-0.446458	0.00348214	-2.80173	0.99984	-0.446458	-0.892916	8.24613e-05
rs146200248	0.306113	1.84574	0.986141	-0.459644	0.306113	1.84574	0.986141	-0.459644	-0.919288	8.0315e-05
rs11854123	0.00722296	2.65605	0.999669	-0.479822	0.00722296	2.65605	0.999669	-0.479822	-0.959644	7.71384e-05
rs7180518	0.0034636	-2.77085	0.999841	-0.535147	0.0034636	-2.77085	0.999841	-0.535147	-1.07029	6.90583e-05
rs137973103	0.0437454	-2.26382	0.997996	-0.548903	0.0437454	-2.26382	0.997996	-0.548903	-1.09781	6.71842e-05
rs11633877	0.00934901	2.58005	0.999571	-0.550082	0.00934901	2.58005	0.999571	-0.550082	-1.10016	6.70261e-05
rs192770464	0.142104	1.98956	0.993518	-0.553042	0.142104	1.98956	0.993518	-0.553042	-1.10608	6.66304e-05
rs28633383	0.00732544	2.62503	0.999664	-0.554672	0.00732544	2.62503	0.999664	-0.554672	-1.10934	6.64135e-05
rs538775378	0.138365	1.99287	0.993688	-0.559402	0.138365	1.99287	0.993688	-0.559402	-1.1188	6.57882e-05
rs34638678	0.00738733	2.60677	0.999661	-0.598217	0.00738733	2.60677	0.999661	-0.598217	-1.19643	6.08743e-05
rs28385066	0.158897	1.93439	0.992758	-0.606535	0.158897	1.93439	0.992758	-0.606535	-1.21307	5.987e-05
rs8023870	0.00754831	2.59218	0.999654	-0.625391	0.00754831	2.59218	0.999654	-0.625391	-1.25078	5.76542e-05
rs183359543	0.0717035	2.11461	0.996719	-0.631328	0.0717035	2.11461	0.996719	-0.631328	-1.26266	5.69736e-05
rs184613477	0.190803	1.87149	0.991316	-0.637121	0.190803	1.87149	0.991316	-0.637121	-1.27424	5.63174e-05
rs12914981	0.036243	2.26428	0.998339	-0.640888	0.036243	2.26428	0.998339	-0.640888	-1.28178	5.58947e-05
rs55904666	0.0166232	2.42525	0.999237	-0.650713	0.0166232	2.42525	0.999237	-0.650713	-1.30143	5.48071e-05
rs8037851	0.00719767	2.57932	0.99967	-0.682354	0.00719767	2.57932	0.99967	-0.682354	-1.36471	5.14463e-05
rs112285691	0.023761	-2.33367	0.99891	-0.690889	0.023761	-2.33367	0.99891	-0.690889	-1.38178	5.05755e-05
rs141373217	0.113991	1.97302	0.994794	-0.692695	0.113991	1.97302	0.994794	-0.692695	-1.38539	5.03932e-05
rs193249942	0.142882	1.90811	0.993483	-0.708092	0.142882	1.90811	0.993483	-0.708092	-1.41618	4.88649e-05
rs116980149	0.149208	1.89263	0.993196	-0.716308	0.149208	1.89263	0.993196	-0.716308	-1.43262	4.80686e-05
rs428387	0.159236	-1.87567	0.992742	-0.716558	0.159236	-1.87567	0.992742	-0.716558	-1.43312	4.80446e-05
rs111853451	0.132771	1.9142	0.993941	-0.732149	0.132771	1.9142	0.993941	-0.732149	-1.4643	4.65696e-05
rs28433193	0.00724657	2.55724	0.999667	-0.73565	0.00724657	2.55724	0.999667	-0.73565	-1.4713	4.62447e-05
rs35234181	0.00337091	-2.69312	0.999845	-0.761018	0.00337091	-2.69312	0.999845	-0.761018	-1.52204	4.39569e-05
rs76677426	0.0701376	2.05549	0.99679	-0.765038	0.0701376	2.05549	0.99679	-0.765038	-1.53008	4.36049e-05
rs112369416	0.0256605	-2.28433	0.998823	-0.766517	0.0256605	-2.28433	0.998823	-0.766517	-1.53303	4.34761e-05
rs2601150	0.131818	-1.89557	0.993985	-0.770926	0.131818	-1.89557	0.993985	-0.770926	-1.54185	4.30944e-05
rs188948553	0.166708	1.83339	0.992404	-0.772211	0.166708	1.83339	0.992404	-0.772211	-1.54442	4.29838e-05
rs2655477	0.00915566	2.49486	0.99958	-0.776582	0.00915566	2.49486	0.99958	-0.776582	-1.55316	4.26097e-05
rs9920226	0.00725589	2.53911	0.999667	-0.781208	0.00725589	2.53911	0.999667	-0.781208	-1.56242	4.22172e-05
rs9672205	0.00725037	2.5389	0.999667	-0.782116	0.00725037	2.5389	0.999667	-0.782116	-1.56423	4.21406e-05
rs12907173	0.0599368	2.07916	0.997256	-0.793623	0.0599368	2.07916	0.997256	-0.793623	-1.58725	4.11819e-05
rs140802801	0.166797	1.80899	0.9924	-0.816055	0.166797	1.80899	0.9924	-0.816055	-1.63211	3.93752e-05
rs35931123	0.00726071	2.51783	0.999667	-0.834653	0.00726071	2.51783	0.999667	-0.834653	-1.66931	3.79375e-05
rs8040507	0.0327918	2.19564	0.998497	-0.843283	0.0327918	2.19564	0.998497	-0.843283	-1.68657	3.72882e-05
rs188774755	0.116748	1.87584	0.994669	-0.867068	0.116748	1.87584	0.994669	-0.867068	-1.73414	3.5556e-05
rs191585605	0.138303	-1.82744	0.993691	-0.873615	0.138303	-1.82744	0.993691	-0.873615	-1.74723	3.50935e-05
rs1256857	0.00927839	2.45254	0.999574	-0.874593	0.00927839	2.45254	0.999574	-0.874593	-1.74919	3.50249e-05
rs143930869	0.126557	-1.83743	0.994223	-0.898643	0.126557	-1.83743	0.994223	-0.898643	-1.79729	3.33801e-05
rs1256855	0.00932254	2.43317	0.999572	-0.919503	0.00932254	2.43317	0.999572	-0.919503	-1.83901	3.20161e-05
rs138135647	0.0423948	2.10011	0.998057	-0.920917	0.0423948	2.10011	0.998057	-0.920917	-1.84183	3.19257e-05
rs141264522	0.072723	1.96804	0.996672	-0.922595	0.072723	1.96804	0.996672	-0.922595	-1.84519	3.18187e-05
rs959056	0.125184	-1.82719	0.994286	-0.92261	0.125184	-1.82719	0.994286	-0.92261	-1.84522	3.18178e-05
rs769461076	0.172408	1.73868	0.992147	-0.923777	0.172408	1.73868	0.992147	-0.923777	-1.84755	3.17436e-05
rs11635388	0.00414354	-2.59199	0.99981	-0.925169	0.00414354	-2.59199	0.99981	-0.925169	-1.85034	3.16554e-05
rs187334244	0.199527	-1.67294	0.990923	-0.964334	0.199527	-1.67294	0.990923	-0.964334	-1.92867	2.92704e-05
rs148321250	0.0669588	1.96471	0.996935	-0.969786	0.0669588	1.96471	0.996935	-0.969786	-1.93957	2.8953e-05
rs188953557	0.140069	-1.76908	0.99361	-0.971715	0.140069	-1.76908	0.99361	-0.971715	-1.94343	2.88415e-05
rs7161937	0.0059835	2.50049	0.999725	-0.974665	0.0059835	2.50049	0.999725	-0.974665	-1.94933	2.86718e-05
rs779735705	0.103884	-1.83713	0.995253	-0.995642	0.103884	-1.83713	0.995253	-0.995642	-1.99128	2.74938e-05
rs112098001	0.0189021	2.24271	0.999133	-1.01251	0.0189021	2.24271	0.999133	-1.01251	-2.02502	2.65817e-05
rs1256856	0.00928594	2.39321	0.999574	-1.01787	0.00928594	2.39321	0.999574	-1.01787	-2.03574	2.62982e-05
rs76240640	0.0186066	-2.24192	0.999146	-1.02213	0.0186066	-2.24192	0.999146	-1.02213	-2.04425	2.60755e-05
rs148810924	0.0590427	1.96488	0.997297	-1.03148	0.0590427	1.96488	0.997297	-1.03148	-2.06295	2.55923e-05
rs1256833	0.00914066	2.38521	0.999581	-1.04484	0.00914066	2.38521	0.999581	-1.04484	-2.08968	2.49174e-05
rs1256832	0.00913571	2.38344	0.999581	-1.04933	0.00913571	2.38344	0.999581	-1.04933	-2.09866	2.46947e-05
rs10775248	0.00336822	-2.58333	0.999845	-1.05102	0.00336822	-2.58333	0.999845	-1.05102	-2.10204	2.46113e-05
rs1256831	0.00913246	2.38113	0.999581	-1.055	0.00913246	2.38113	0.999581	-1.055	-2.11	2.44161e-05
rs72762375	0.0255693	-2.15497	0.998827	-1.05506	0.0255693	-2.15497	0.998827	-1.05506	-2.11013	2.4413e-05
rs1699486	0.00913953	2.38025	0.999581	-1.05671	0.00913953	2.38025	0.999581	-1.05671	-2.11342	2.43329e-05
rs201527612	0.0277879	-2.13039	0.998726	-1.06636	0.0277879	-2.13039	0.998726	-1.06636	-2.13273	2.38675e-05
rs185893559	0.078222	-1.86983	0.996422	-1.07455	0.078222	-1.86983	0.996422	-1.07455	-2.14909	2.348e-05
rs148753485	0.120319	1.75228	0.994506	-1.07528	0.120319	1.75228	0.994506	-1.07528	-2.15057	2.34454e-05
rs62020724	0.020105	2.19759	0.999078	-1.08191	0.020105	2.19759	0.999078	-1.08191	-2.16381	2.31369e-05
rs117741451	0.0660444	-1.90864	0.996977	-1.08481	0.0660444	-1.90864	0.996977	-1.08481	-2.16961	2.30032e-05
rs138009365	0.141268	-1.6913	0.993556	-1.10128	0.141268	-1.6913	0.993556	-1.10128	-2.20256	2.22577e-05
rs17264565	0.115306	1.73923	0.994734	-1.11875	0.115306	1.73923	0.994734	-1.11875	-2.23751	2.14932e-05
rs78032540	0.0192654	2.18532	0.999116	-1.12998	0.0192654	2.18532	0.999116	-1.12998	-2.25997	2.10159e-05
rs12905184	0.00352796	-2.54275	0.999838	-1.13185	0.00352796	-2.54275	0.999838	-1.13185	-2.2637	2.09375e-05
rs59980045	0.00640094	2.42162	0.999706	-1.13507	0.00640094	2.42162	0.999706	-1.13507	-2.27014	2.08032e-05
rs11436538	0.00336517	-2.55018	0.999846	-1.13655	0.00336517	-2.55018	0.999846	-1.13655	-2.2731	2.07417e-05
rs4932274	0.00352614	-2.53622	0.999838	-1.1487	0.00352614	-2.53622	0.999838	-1.1487	-2.29741	2.02436e-05
rs28670758	0.01311	-2.26038	0.999398	-1.1549	0.01311	-2.26038	0.999398	-1.1549	-2.30981	1.99941e-05
rs67125153	0.003659	-2.52549	0.999832	-1.15739	0.003659	-2.52549	0.999832	-1.15739	-2.31478	1.9895e-05
rs148912887	0.0663969	1.85977	0.996961	-1.174	0.0663969	1.85977	0.996961	-1.174	-2.34799	1.9245e-05
rs71407305	0.0398302	1.99051	0.998175	-1.17555	0.0398302	1.99051	0.998175	-1.17555	-2.3511	1.91853e-05
rs147312586	0.0883766	1.77839	0.995959	-1.18068	0.0883766	1.77839	0.995959	-1.18068	-2.36136	1.89895e-05
rs113400654	0.0702876	-1.83983	0.996783	-1.18268	0.0702876	-1.83983	0.996783	-1.18268	-2.36536	1.89137e-05
rs1913483	0.00328767	2.53522	0.999849	-1.18621	0.00328767	2.53522	0.999849	-1.18621	-2.37241	1.87807e-05
rs72756589	0.0463222	1.933	0.997878	-1.21339	0.0463222	1.933	0.997878	-1.21339	-2.42678	1.7787e-05
rs11629802	0.00339493	-2.51419	0.999844	-1.22325	0.00339493	-2.51419	0.999844	-1.22325	-2.44651	1.74395e-05
rs77547928	0.0466012	-1.92411	0.997865	-1.22751	0.0466012	-1.92411	0.997865	-1.22751	-2.45502	1.72916e-05
rs35673384	0.116307	-1.66253	0.994689	-1.24429	0.116307	-1.66253	0.994689	-1.24429	-2.48858	1.67209e-05
rs117432466	0.0602069	-1.84744	0.997243	-1.24509	0.0602069	-1.84744	0.997243	-1.24509	-2.49018	1.66942e-05
rs147182522	0.0779063	-1.76818	0.996436	-1.26078	0.0779063	-1.76818	0.996436	-1.26078	-2.52155	1.61787e-05
rs11633304	0.00339486	-2.49663	0.999844	-1.26727	0.00339486	-2.49663	0.999844	-1.26727	-2.53453	1.597e-05
rs7175921	0.00352228	-2.48751	0.999838	-1.27157	0.00352228	-2.48751	0.999838	-1.27157	-2.54314	1.58331e-05
rs1106990	0.0033861	-2.4952	0.999845	-1.27213	0.0033861	-2.4952	0.999845	-1.27213	-2.54425	1.58155e-05
rs4932272	0.0033656	-2.4943	0.999846	-1.27739	0.0033656	-2.4943	0.999846	-1.27739	-2.55478	1.56499e-05
rs7176299	0.0035207	-2.48468	0.999838	-1.27883	0.0035207	-2.48468	0.999838	-1.27883	-2.55766	1.56049e-05
rs11856707	0.0033862	-2.49139	0.999845	-1.28159	0.0033862	-2.49139	0.999845	-1.28159	-2.56318	1.5519e-05
rs7174425	0.00352185	-2.48126	0.999838	-1.28716	0.00352185	-2.48126	0.999838	-1.28716	-2.57433	1.5347e-05
rs149207094	0.0982308	-1.68525	0.99551	-1.28934	0.0982308	-1.68525	0.99551	-1.28934	-2.57868	1.52804e-05
rs10775249	0.00337087	-2.48317	0.999845	-1.30431	0.00337087	-2.48317	0.999845	-1.30431	-2.60861	1.48297e-05
rs117810770	0.0357796	-1.95128	0.99836	-1.30592	0.0357796	-1.95128	0.99836	-1.30592	-2.61184	1.47819e-05
rs143608195	0.0974532	-1.67751	0.995546	-1.30621	0.0974532	-1.67751	0.995546	-1.30621	-2.61241	1.47735e-05
rs2174694	0.00337753	-2.48127	0.999845	-1.30803	0.00337753	-2.48127	0.999845	-1.30803	-2.61606	1.47197e-05
rs7163762	0.00466959	-2.41389	0.999786	-1.31116	0.00466959	-2.41389	0.999786	-1.31116	-2.62232	1.46277e-05
rs11852297	0.00337131	-2.48012	0.999845	-1.31182	0.00337131	-2.48012	0.999845	-1.31182	-2.62364	1.46085e-05
rs2135658	0.00337352	-2.47944	0.999845	-1.31317	0.00337352	-2.47944	0.999845	-1.31317	-2.62633	1.45693e-05
rs2135657	0.00337386	-2.47763	0.999845	-1.3176	0.00337386	-2.47763	0.999845	-1.3176	-2.63521	1.44405e-05
rs566752068	0.0524877	1.84169	0.997596	-1.32349	0.0524877	1.84169	0.997596	-1.32349	-2.64697	1.42716e-05
rs11073925	0.00737713	2.29275	0.999661	-1.36792	0.00737713	2.29275	0.999661	-1.36792	-2.73584	1.30581e-05
rs57204763	0.00386933	-2.42646	0.999822	-1.37464	0.00386933	-2.42646	0.999822	-1.37464	-2.74927	1.28838e-05
rs562478577	0.0423084	-1.86792	0.998061	-1.38171	0.0423084	-1.86792	0.998061	-1.38171	-2.76342	1.27028e-05
rs56206947	0.0201901	-2.05508	0.999074	-1.38255	0.0201901	-2.05508	0.999074	-1.38255	-2.76509	1.26816e-05
rs74599937	0.00977524	2.22184	0.999551	-1.38752	0.00977524	2.22184	0.999551	-1.38752	-2.77505	1.2556e-05
rs112490195	0.0453268	-1.8449	0.997923	-1.39021	0.0453268	-1.8449	0.997923	-1.39021	-2.78043	1.24886e-05
rs149149371	0.0818435	-1.67616	0.996257	-1.39438	0.0818435	-1.67616	0.996257	-1.39438	-2.78875	1.23851e-05
rs60048588	0.00749076	2.27682	0.999656	-1.39668	0.00749076	2.27682	0.999656	-1.39668	-2.79336	1.23281e-05
rs116448984	0.0337174	-1.91456	0.998454	-1.40623	0.0337174	-1.91456	0.998454	-1.40623	-2.81246	1.20949e-05
rs144989421	0.081266	-1.66907	0.996283	-1.40969	0.081266	-1.66907	0.996283	-1.40969	-2.81937	1.20116e-05
rs149180396	0.00342385	-2.43162	0.999843	-1.42318	0.00342385	-2.43162	0.999843	-1.42318	-2.84637	1.16917e-05
rs113404146	0.00479174	-2.36046	0.99978	-1.42579	0.00479174	-2.36046	0.99978	-1.42579	-2.85158	1.16309e-05
rs1269077	0.00498673	2.35183	0.999771	-1.4262	0.00498673	2.35183	0.999771	-1.4262	-2.85241	1.16213e-05
rs4316732	0.00464569	-2.35425	0.999787	-1.45589	0.00464569	-2.35425	0.999787	-1.45589	-2.91178	1.09514e-05
rs35346715	0.057423	1.73147	0.997371	-1.47546	0.057423	1.73147	0.997371	-1.47546	-2.95091	1.05311e-05
rs34123931	0.00466152	-2.3429	0.999786	-1.48085	0.00466152	-2.3429	0.999786	-1.48085	-2.9617	1.04181e-05
rs11073901	0.00465341	-2.34274	0.999786	-1.48209	0.00465341	-2.34274	0.999786	-1.48209	-2.96418	1.03923e-05
rs28484767	0.00465674	-2.34022	0.999786	-1.48764	0.00465674	-2.34022	0.999786	-1.48764	-2.97528	1.02776e-05
rs35795957	0.0194343	2.01185	0.999109	-1.48937	0.0194343	2.01185	0.999109	-1.48937	-2.97874	1.02421e-05
rs1206680	0.0679728	-1.67308	0.996889	-1.49117	0.0679728	-1.67308	0.996889	-1.49117	-2.98233	1.02054e-05
rs34380663	0.00465517	-2.33684	0.999786	-1.49569	0.00465517	-2.33684	0.999786	-1.49569	-2.99138	1.01134e-05
rs8032566	0.00465494	-2.33299	0.999786	-1.50472	0.00465494	-2.33299	0.999786	-1.50472	-3.00943	9.9325e-06
rs8032563	0.00465625	-2.33212	0.999786	-1.50661	0.00465625	-2.33212	0.999786	-1.50661	-3.01321	9.89504e-06
rs185142634	0.0486864	1.75549	0.99777	-1.51539	0.0486864	1.75549	0.99777	-1.51539	-3.03078	9.72276e-06
rs4436756	0.00466716	-2.32626	0.999786	-1.51908	0.00466716	-2.32626	0.999786	-1.51908	-3.03817	9.65116e-06
rs1702168	0.00509645	2.30673	0.999766	-1.52038	0.00509645	2.30673	0.999766	-1.52038	-3.04075	9.62623e-06
rs11073897	0.00338503	-2.39257	0.999845	-1.52306	0.00338503	-2.39257	0.999845	-1.52306	-3.04612	9.57473e-06
rs8041780	0.00720835	2.22522	0.999669	-1.53196	0.00720835	2.22522	0.999669	-1.53196	-3.06392	9.40576e-06
rs4932163	0.00465453	-2.32113	0.999786	-1.53235	0.00465453	-2.32113	0.999786	-1.53235	-3.0647	9.39848e-06
rs9635390	0.023929	-1.93651	0.998903	-1.53444	0.023929	-1.93651	0.998903	-1.53444	-3.06889	9.35918e-06
rs28611491	0.0118588	-2.10845	0.999456	-1.53658	0.0118588	-2.10845	0.999456	-1.53658	-3.07315	9.31936e-06
rs1256835	0.00493517	2.30399	0.999773	-1.54275	0.00493517	2.30399	0.999773	-1.54275	-3.0855	9.20501e-06
rs62022292	0.00712574	2.2212	0.999673	-1.54665	0.00712574	2.2212	0.999673	-1.54665	-3.09329	9.13352e-06
rs148413372	0.0237971	1.93134	0.998909	-1.54718	0.0237971	1.93134	0.998909	-1.54718	-3.09435	9.12387e-06
rs56341607	0.0118298	-2.09077	0.999457	-1.57489	0.0118298	-2.09077	0.999457	-1.57489	-3.14977	8.63195e-06
rs117121928	0.0437814	1.75013	0.997994	-1.5774	0.0437814	1.75013	0.997994	-1.5774	-3.15481	8.5886e-06
rs7169036	0.00462614	2.29656	0.999788	-1.59212	0.00462614	2.29656	0.999788	-1.59212	-3.18425	8.33944e-06
rs112096092	0.0460905	1.72089	0.997888	-1.60256	0.0460905	1.72089	0.997888	-1.60256	-3.20511	8.16727e-06
rs71151543	0.00976901	2.1218	0.999552	-1.60502	0.00976901	2.1218	0.999552	-1.60502	-3.21004	8.12712e-06
rs118011960	0.0455596	1.72037	0.997913	-1.60919	0.0455596	1.72037	0.997913	-1.60919	-3.21839	8.05956e-06
rs146011024	0.0497651	1.68946	0.99772	-1.61801	0.0497651	1.68946	0.99772	-1.61801	-3.23602	7.91866e-06
rs79943794	0.0310464	-1.82129	0.998577	-1.62119	0.0310464	-1.82129	0.998577	-1.62119	-3.24239	7.86842e-06
rs28489267	0.0046797	-2.27879	0.999785	-1.62702	0.0046797	-2.27879	0.999785	-1.62702	-3.25404	7.77726e-06
rs28727276	0.00467976	-2.27864	0.999785	-1.62735	0.00467976	-2.27864	0.999785	-1.62735	-3.2547	7.77213e-06
rs28405203	0.0072786	2.17557	0.999666	-1.63635	0.0072786	2.17557	0.999666	-1.63635	-3.27269	7.63353e-06
rs12909376	0.00364323	-2.32636	0.999833	-1.64254	0.00364323	-2.32636	0.999833	-1.64254	-3.28508	7.53953e-06
rs76662718	0.0481609	1.68447	0.997794	-1.64266	0.0481609	1.68447	0.997794	-1.64266	-3.28531	7.5378e-06
rs28669848	0.00836164	2.13905	0.999616	-1.64588	0.00836164	2.13905	0.999616	-1.64588	-3.29177	7.48931e-06
rs148422843	0.0427435	-1.71631	0.998041	-1.64781	0.0427435	-1.71631	0.998041	-1.64781	-3.29562	7.46053e-06
rs62019426	0.0196157	1.92512	0.9991	-1.65531	0.0196157	1.92512	0.9991	-1.65531	-3.31062	7.34941e-06
rs28625196	0.00728913	2.15182	0.999665	-1.68698	0.00728913	2.15182	0.999665	-1.68698	-3.37397	6.8983e-06
rs61302266	0.00465872	-2.2529	0.999786	-1.68792	0.00465872	-2.2529	0.999786	-1.68792	-3.37583	6.88546e-06
rs8033620	0.00474979	-2.24129	0.999782	-1.70432	0.00474979	-2.24129	0.999782	-1.70432	-3.40864	6.66326e-06
rs67024503	0.00401979	-2.27489	0.999815	-1.71181	0.00401979	-2.27489	0.999815	-1.71181	-3.42361	6.56422e-06
rs28630708	0.00691712	2.14296	0.999683	-1.73217	0.00691712	2.14296	0.999683	-1.73217	-3.46433	6.3023e-06
rs28662807	0.00400833	-2.2665	0.999816	-1.73228	0.00400833	-2.2665	0.999816	-1.73228	-3.46457	6.3008e-06
rs1256851	0.00539841	2.19682	0.999752	-1.73907	0.00539841	2.19682	0.999752	-1.73907	-3.47813	6.21591e-06
rs8039645	0.0048341	-2.21651	0.999778	-1.75075	0.0048341	-2.21651	0.999778	-1.75075	-3.50151	6.0723e-06
rs12915045	0.00729176	2.11669	0.999665	-1.76176	0.00729176	2.11669	0.999665	-1.76176	-3.52353	5.94004e-06
rs7175469	0.00470687	-2.21748	0.999784	-1.76192	0.00470687	-2.21748	0.999784	-1.76192	-3.52384	5.93819e-06
rs113028104	0.0310711	-1.74156	0.998576	-1.76263	0.0310711	-1.74156	0.998576	-1.76263	-3.52527	5.92972e-06
rs28468499	0.00728467	2.11108	0.999666	-1.77411	0.00728467	2.11108	0.999666	-1.77411	-3.54823	5.79514e-06
rs1256854	0.00524096	2.18729	0.999759	-1.77473	0.00524096	2.18729	0.999759	-1.77473	-3.54945	5.78804e-06
rs28733319	0.00369792	-2.25681	0.99983	-1.79444	0.00369792	-2.25681	0.99983	-1.79444	-3.58887	5.56431e-06
rs8036558	0.00719192	2.10337	0.99967	-1.79673	0.00719192	2.10337	0.99967	-1.79673	-3.59347	5.53879e-06
rs7170906	0.00729328	2.09992	0.999665	-1.797	0.00729328	2.09992	0.999665	-1.797	-3.59399	5.53589e-06
rs9944274	0.0032995	2.2774	0.999849	-1.80471	0.0032995	2.2774	0.999849	-1.80471	-3.60942	5.45116e-06
rs11856803	0.00342992	-2.26871	0.999843	-1.80511	0.00342992	-2.26871	0.999843	-1.80511	-3.61021	5.44681e-06
rs1256827	0.0296639	-1.7244	0.99864	-1.81538	0.0296639	-1.7244	0.99864	-1.81538	-3.63075	5.33608e-06
rs8037888	0.00718746	2.08929	0.99967	-1.82655	0.00718746	2.08929	0.99967	-1.82655	-3.6531	5.21815e-06
rs8024386	0.00475896	-2.18338	0.999782	-1.83145	0.00475896	-2.18338	0.999782	-1.83145	-3.66289	5.1673e-06
rs1256838	0.00529856	2.15865	0.999757	-1.83149	0.00529856	2.15865	0.999757	-1.83149	-3.66297	5.1669e-06
rs140571065	0.0161168	-1.88319	0.999261	-1.83295	0.0161168	-1.88319	0.999261	-1.83295	-3.6659	5.15177e-06
rs62019348	0.016907	1.87004	0.999224	-1.83376	0.016907	1.87004	0.999224	-1.83376	-3.66752	5.14347e-06
rs4595779	0.00413336	2.20962	0.99981	-1.84422	0.00413336	2.20962	0.99981	-1.84422	-3.68843	5.03702e-06
rs80099646	0.00529501	-2.15145	0.999757	-1.84735	0.00529501	-2.15145	0.999757	-1.84735	-3.69469	5.00558e-06
rs112682793	0.00741505	2.07139	0.99966	-1.84822	0.00741505	2.07139	0.99966	-1.84822	-3.69644	4.99683e-06
rs62019405	0.0118096	-1.95578	0.999458	-1.84873	0.0118096	-1.95578	0.999458	-1.84873	-3.69746	4.99173e-06
rs12917588	0.013614	1.91683	0.999375	-1.8532	0.013614	1.91683	0.999375	-1.8532	-3.7064	4.94734e-06
rs9672635	0.00472128	-2.16873	0.999783	-1.86729	0.00472128	-2.16873	0.999783	-1.86729	-3.73458	4.80986e-06
rs7498065	0.00415126	2.19578	0.999809	-1.87252	0.00415126	2.19578	0.999809	-1.87252	-3.74505	4.75976e-06
rs112495893	0.00744467	2.05629	0.999658	-1.87738	0.00744467	2.05629	0.999658	-1.87738	-3.75477	4.71371e-06
rs9708177	0.0112235	-1.95099	0.999485	-1.88346	0.0112235	-1.95099	0.999485	-1.88346	-3.76692	4.65681e-06
rs11638431	0.00729391	2.0574	0.999665	-1.88532	0.00729391	2.0574	0.999665	-1.88532	-3.77063	4.63952e-06
rs2158407	0.0068519	2.07125	0.999686	-1.88794	0.0068519	2.07125	0.999686	-1.88794	-3.77589	4.61521e-06
rs16944473	0.00685102	2.07127	0.999686	-1.88796	0.00685102	2.07127	0.999686	-1.88796	-3.77592	4.61507e-06
rs8030623	0.00330731	2.23915	0.999848	-1.88989	0.00330731	2.23915	0.999848	-1.88989	-3.77978	4.59727e-06
rs1008507	0.00685178	2.07001	0.999686	-1.89052	0.00685178	2.07001	0.999686	-1.89052	-3.78103	4.59152e-06
rs1256837	0.0052877	2.12903	0.999757	-1.896	0.0052877	2.12903	0.999757	-1.896	-3.792	4.54146e-06
rs1256839	0.00530998	2.125	0.999756	-1.90247	0.00530998	2.125	0.999756	-1.90247	-3.80494	4.48304e-06
rs28455124	0.00471968	-2.15224	0.999783	-1.90307	0.00471968	-2.15224	0.999783	-1.90307	-3.80614	4.47768e-06
rs11073896	0.00345963	-2.22297	0.999841	-1.9035	0.00345963	-2.22297	0.999841	-1.9035	-3.807	4.47382e-06
rs8030783	0.00330863	2.23111	0.999848	-1.90767	0.00330863	2.23111	0.999848	-1.90767	-3.81534	4.43668e-06
rs2943225	0.00523412	-2.12481	0.99976	-1.91006	0.00523412	-2.12481	0.99976	-1.91006	-3.82013	4.41548e-06
rs6496630	0.0047224	-2.14816	0.999783	-1.91156	0.0047224	-2.14816	0.999783	-1.91156	-3.82312	4.40229e-06
rs6496631	0.00474946	-2.1388	0.999782	-1.92877	0.00474946	-2.1388	0.999782	-1.92877	-3.85755	4.25331e-06
rs12910287	0.0051984	-2.11648	0.999761	-1.93114	0.0051984	-2.11648	0.999761	-1.93114	-3.86229	4.2332e-06
rs79775292	0.00519841	-2.11645	0.999761	-1.93121	0.00519841	-2.11645	0.999761	-1.93121	-3.86241	4.23266e-06
rs1256842	0.0262894	1.68805	0.998794	-1.93738	0.0262894	1.68805	0.998794	-1.93738	-3.87477	4.18069e-06
rs11632380	0.00684273	2.04643	0.999686	-1.9397	0.00684273	2.04643	0.999686	-1.9397	-3.8794	4.16137e-06
rs11636731	0.00684404	2.0458	0.999686	-1.94089	0.00684404	2.0458	0.999686	-1.94089	-3.88179	4.15144e-06
rs34936041	0.00736265	2.0274	0.999662	-1.94188	0.00736265	2.0274	0.999662	-1.94188	-3.88377	4.14324e-06
rs7172859	0.00684217	2.045	0.999686	-1.94266	0.00684217	2.045	0.999686	-1.94266	-3.88532	4.13681e-06
rs62019196	0.0113154	-1.91294	0.999481	-1.95287	0.0113154	-1.91294	0.999481	-1.95287	-3.90573	4.05322e-06
rs1256836	0.00529221	2.09588	0.999757	-1.9656	0.00529221	2.09588	0.999757	-1.9656	-3.93119	3.95134e-06
rs79814880	0.0109424	-1.91339	0.999498	-1.96873	0.0109424	-1.91339	0.999498	-1.96873	-3.93745	3.92667e-06
rs11854794	0.00333551	2.20087	0.999847	-1.97062	0.00333551	2.20087	0.999847	-1.97062	-3.94124	3.91182e-06
rs11856037	0.00473378	-2.11915	0.999783	-1.97224	0.00473378	-2.11915	0.999783	-1.97224	-3.94448	3.89919e-06
rs189780161	0.00940136	1.94997	0.999569	-1.97383	0.00940136	1.94997	0.999569	-1.97383	-3.94766	3.88679e-06
rs11855556	0.00342797	-2.1915	0.999843	-1.97754	0.00342797	-2.1915	0.999843	-1.97754	-3.95508	3.85805e-06
rs28691618	0.00684093	2.02739	0.999686	-1.9786	0.00684093	2.02739	0.999686	-1.9786	-3.9572	3.84989e-06
rs8027565	0.00683643	2.02229	0.999686	-1.98926	0.00683643	2.02229	0.999686	-1.98926	-3.97851	3.76871e-06
rs78490676	0.0260561	1.65858	0.998805	-1.99107	0.0260561	1.65858	0.998805	-1.99107	-3.98215	3.75504e-06
rs11073928	0.00684725	2.02076	0.999686	-1.99155	0.00684725	2.02076	0.999686	-1.99155	-3.9831	3.75146e-06
rs62021772	0.00688639	2.00901	0.999684	-2.01238	0.00688639	2.00901	0.999684	-2.01238	-4.02475	3.59841e-06
rs9652516	0.00468105	-2.0963	0.999785	-2.02599	0.00468105	-2.0963	0.999785	-2.02599	-4.05198	3.50174e-06
rs77905058	0.00715163	1.99124	0.999672	-2.02903	0.00715163	1.99124	0.999672	-2.02903	-4.05806	3.48053e-06
rs112166517	0.00686757	1.99993	0.999685	-2.03193	0.00686757	1.99993	0.999685	-2.03193	-4.06385	3.46043e-06
rs35509442	0.00688193	1.99938	0.999684	-2.032	0.00688193	1.99938	0.999684	-2.032	-4.06399	3.45994e-06
rs28385128	0.0119997	-1.85418	0.999449	-2.03421	0.0119997	-1.85418	0.999449	-2.03421	-4.06841	3.44468e-06
rs6496654	0.00325856	2.17654	0.99985	-2.03554	0.00325856	2.17654	0.99985	-2.03554	-4.07108	3.43552e-06
rs71154123	0.0145535	1.79884	0.999332	-2.039	0.0145535	1.79884	0.999332	-2.039	-4.078	3.41181e-06
rs9944285	0.00683752	1.99622	0.999686	-2.04153	0.00683752	1.99622	0.999686	-2.04153	-4.08306	3.39458e-06
rs16944485	0.0068296	1.99631	0.999687	-2.04193	0.0068296	1.99631	0.999687	-2.04193	-4.08385	3.39191e-06
rs11629883	0.00683091	1.99612	0.999686	-2.04221	0.00683091	1.99612	0.999686	-2.04221	-4.08442	3.38997e-06
rs11638162	0.00325847	2.17163	0.99985	-2.04622	0.00325847	2.17163	0.99985	-2.04622	-4.09245	3.36287e-06
rs4932271	0.00341463	-2.15981	0.999843	-2.04843	0.00341463	-2.15981	0.999843	-2.04843	-4.09686	3.34806e-06
rs11631310	0.00786411	1.95334	0.999639	-2.05635	0.00786411	1.95334	0.999639	-2.05635	-4.1127	3.29546e-06
rs62020738	0.00694097	1.9825	0.999681	-2.06132	0.00694097	1.9825	0.999681	-2.06132	-4.12264	3.26286e-06
rs8041397	0.00684113	1.98576	0.999686	-2.0621	0.00684113	1.98576	0.999686	-2.0621	-4.12419	3.2578e-06
rs36123717	0.00696202	1.9813	0.99968	-2.06219	0.00696202	1.9813	0.99968	-2.06219	-4.12438	3.2572e-06
rs2352212	0.00328848	2.1614	0.999849	-2.0638	0.00328848	2.1614	0.999849	-2.0638	-4.12761	3.2467e-06
rs8034014	0.00361805	2.1358	0.999834	-2.07108	0.00361805	2.1358	0.999834	-2.07108	-4.14215	3.19982e-06
rs62021773	0.00688186	1.97743	0.999684	-2.07562	0.00688186	1.97743	0.999684	-2.07562	-4.15123	3.17089e-06
rs112599382	0.00816751	1.93014	0.999625	-2.08249	0.00816751	1.93014	0.999625	-2.08249	-4.16499	3.12758e-06
rs55736837	0.00534857	-2.03338	0.999755	-2.08931	0.00534857	-2.03338	0.999755	-2.08931	-4.17862	3.08524e-06
rs62025066	0.0131338	-1.79797	0.999397	-2.09174	0.0131338	-1.79797	0.999397	-2.09174	-4.18347	3.07029e-06
rs12900687	0.00326197	2.1494	0.99985	-2.09371	0.00326197	2.1494	0.99985	-2.09371	-4.18742	3.0582e-06
rs62021775	0.00683701	1.96333	0.999686	-2.10667	0.00683701	1.96333	0.999686	-2.10667	-4.21334	2.97995e-06
rs28385173	0.0113459	-1.82893	0.999479	-2.10862	0.0113459	-1.82893	0.999479	-2.10862	-4.21725	2.96833e-06
rs369905653	0.00718349	1.94964	0.99967	-2.10875	0.00718349	1.94964	0.99967	-2.10875	-4.2175	2.96756e-06
rs1271595	0.00962192	1.86925	0.999558	-2.11634	0.00962192	1.86925	0.999558	-2.11634	-4.23268	2.92288e-06
rs12050766	0.00683613	1.95603	0.999686	-2.12104	0.00683613	1.95603	0.999686	-2.12104	-4.24207	2.89555e-06
rs28672102	0.00683529	1.95445	0.999686	-2.12417	0.00683529	1.95445	0.999686	-2.12417	-4.24834	2.87744e-06
rs17523637	0.010947	-1.82795	0.999498	-2.12826	0.010947	-1.82795	0.999498	-2.12826	-4.25652	2.85401e-06
rs72760432	0.00598536	1.98562	0.999725	-2.12908	0.00598536	1.98562	0.999725	-2.12908	-4.25816	2.84934e-06
rs9672249	0.00467945	-2.0464	0.999785	-2.1295	0.00467945	-2.0464	0.999785	-2.1295	-4.259	2.84694e-06
rs28629981	0.00682469	1.95127	0.999687	-2.13115	0.00682469	1.95127	0.999687	-2.13115	-4.26231	2.83754e-06
rs16944527	0.00683514	1.94926	0.999686	-2.13431	0.00683514	1.94926	0.999686	-2.13431	-4.26863	2.81967e-06
rs28644306	0.0068336	1.94912	0.999686	-2.13471	0.0068336	1.94912	0.999686	-2.13471	-4.26941	2.81746e-06
rs10520689	0.00691617	1.94436	0.999683	-2.13796	0.00691617	1.94436	0.999683	-2.13796	-4.27593	2.79916e-06
rs16944355	0.00691717	1.94302	0.999683	-2.1405	0.00691717	1.94302	0.999683	-2.1405	-4.281	2.78499e-06
rs28685205	0.00682117	1.94617	0.999687	-2.14135	0.00682117	1.94617	0.999687	-2.14135	-4.2827	2.78025e-06
rs28534079	0.00683383	1.94561	0.999686	-2.14151	0.00683383	1.94561	0.999686	-2.14151	-4.28302	2.77937e-06
rs28377586	0.00683215	1.94285	0.999686	-2.147	0.00683215	1.94285	0.999686	-2.147	-4.294	2.74903e-06
rs16944362	0.00690563	1.94006	0.999683	-2.14708	0.00690563	1.94006	0.999683	-2.14708	-4.29417	2.74856e-06
rs28458925	0.00465838	-2.03858	0.999786	-2.14772	0.00465838	-2.03858	0.999786	-2.14772	-4.29543	2.74509e-06
rs28667854	0.00690701	1.93884	0.999683	-2.14934	0.00690701	1.93884	0.999683	-2.14934	-4.29868	2.73618e-06
rs4932281	0.0046904	2.03609	0.999785	-2.14936	0.0046904	2.03609	0.999785	-2.14936	-4.29873	2.73606e-06
rs1699487	0.00518363	2.01061	0.999762	-2.15097	0.00518363	2.01061	0.999762	-2.15097	-4.30194	2.72727e-06
rs28592701	0.00690631	1.938	0.999683	-2.15102	0.00690631	1.938	0.999683	-2.15102	-4.30204	2.727e-06
rs34013734	0.00697345	1.9352	0.99968	-2.15162	0.00697345	1.9352	0.99968	-2.15162	-4.30323	2.72376e-06
rs6496621	0.00468991	2.03388	0.999785	-2.15392	0.00468991	2.03388	0.999785	-2.15392	-4.30784	2.71123e-06
rs7169522	0.00685394	1.93806	0.999685	-2.15471	0.00685394	1.93806	0.999685	-2.15471	-4.30942	2.70696e-06
rs8028234	0.00469117	2.03301	0.999785	-2.15556	0.00469117	2.03301	0.999785	-2.15556	-4.31112	2.70236e-06
rs6496680	0.00682644	1.93615	0.999687	-2.16042	0.00682644	1.93615	0.999687	-2.16042	-4.32083	2.67624e-06
rs62020559	0.00344042	-2.10509	0.999842	-2.16135	0.00344042	-2.10509	0.999842	-2.16135	-4.3227	2.67126e-06
rs6496679	0.00682217	1.9354	0.999687	-2.16218	0.00682217	1.9354	0.999687	-2.16218	-4.32436	2.66682e-06
rs16974215	0.00680764	1.93579	0.999688	-2.16248	0.00680764	1.93579	0.999688	-2.16248	-4.32497	2.66519e-06
rs11852977	0.0069164	1.93154	0.999683	-2.1628	0.0069164	1.93154	0.999683	-2.1628	-4.32559	2.66353e-06
rs4932331	0.00326489	2.11625	0.99985	-2.16394	0.00326489	2.11625	0.99985	-2.16394	-4.32789	2.65743e-06
rs17176399	0.00696649	1.92853	0.99968	-2.16499	0.00696649	1.92853	0.99968	-2.16499	-4.32997	2.65189e-06
rs16944529	0.00683352	1.93319	0.999686	-2.16563	0.00683352	1.93319	0.999686	-2.16563	-4.33126	2.64849e-06
rs8040549	0.00327227	2.11425	0.99985	-2.16706	0.00327227	2.11425	0.99985	-2.16706	-4.33411	2.64094e-06
rs36169351	0.00719057	1.91515	0.99967	-2.1749	0.00719057	1.91515	0.99967	-2.1749	-4.3498	2.59982e-06
rs11852549	0.00690137	1.92513	0.999683	-2.17624	0.00690137	1.92513	0.999683	-2.17624	-4.35247	2.59289e-06
rs2970345	0.0038138	-2.07128	0.999825	-2.18046	0.0038138	-2.07128	0.999825	-2.18046	-4.36091	2.57109e-06
rs10852132	0.00690651	1.91675	0.999683	-2.19196	0.00690651	1.91675	0.999683	-2.19196	-4.38392	2.51263e-06
rs59104553	0.00695104	1.91493	0.999681	-2.19224	0.00695104	1.91493	0.999681	-2.19224	-4.38447	2.51124e-06
rs7182369	0.00467752	-2.01489	0.999785	-2.19368	0.00467752	-2.01489	0.999785	-2.19368	-4.38736	2.50398e-06
rs11631269	0.00681097	1.91695	0.999687	-2.19853	0.00681097	1.91695	0.999687	-2.19853	-4.39706	2.47983e-06
rs8025048	0.00690664	1.90189	0.999683	-2.2203	0.00690664	1.90189	0.999683	-2.2203	-4.44061	2.37415e-06
rs11638900	0.00326273	2.0878	0.99985	-2.22406	0.00326273	2.0878	0.99985	-2.22406	-4.44813	2.35635e-06
rs10459704	0.00691051	1.89703	0.999683	-2.22926	0.00691051	1.89703	0.999683	-2.22926	-4.45852	2.33201e-06
rs28702574	0.00692132	1.89136	0.999682	-2.23921	0.00692132	1.89136	0.999682	-2.23921	-4.47841	2.28607e-06
rs2034084	0.00394673	2.03427	0.999819	-2.2393	0.00394673	2.03427	0.999819	-2.2393	-4.4786	2.28563e-06
rs3029962	0.00405872	-2.02521	0.999814	-2.24372	0.00405872	-2.02521	0.999814	-2.24372	-4.48744	2.26552e-06
rs28782602	0.00691891	1.88886	0.999682	-2.24412	0.00691891	1.88886	0.999682	-2.24412	-4.48823	2.26372e-06
rs16944414	0.00691141	1.88846	0.999683	-2.2454	0.00691141	1.88846	0.999683	-2.2454	-4.49081	2.25791e-06
rs11318271	0.00687709	1.8876	0.999684	-2.24952	0.00687709	1.8876	0.999684	-2.24952	-4.49904	2.23939e-06
rs28384995	0.00739751	-1.86411	0.99966	-2.25714	0.00739751	-1.86411	0.99966	-2.25714	-4.51428	2.20552e-06
rs76489431	0.00696627	1.87594	0.99968	-2.26501	0.00696627	1.87594	0.99968	-2.26501	-4.53002	2.17107e-06
rs112485076	0.00691918	1.87622	0.999682	-2.26788	0.00691918	1.87622	0.999682	-2.26788	-4.53575	2.15867e-06
rs137920271	0.00686379	1.87802	0.999685	-2.26852	0.00686379	1.87802	0.999685	-2.26852	-4.53703	2.15591e-06
rs12913943	0.00596331	1.91272	0.999726	-2.27298	0.00596331	1.91272	0.999726	-2.27298	-4.54597	2.13673e-06
rs11073929	0.00685312	1.87541	0.999685	-2.27419	0.00685312	1.87541	0.999685	-2.27419	-4.54838	2.13158e-06
rs11636205	0.00690408	1.87249	0.999683	-2.27595	0.00690408	1.87249	0.999683	-2.27595	-4.5519	2.12409e-06
rs781459507	0.0040698	-2.00787	0.999813	-2.27731	0.0040698	-2.00787	0.999813	-2.27731	-4.55463	2.11831e-06
rs11857598	0.0069075	1.8664	0.999683	-2.28709	0.0069075	1.8664	0.999683	-2.28709	-4.57419	2.07728e-06
rs2238321	0.00690388	1.86112	0.999683	-2.29718	0.00690388	1.86112	0.999683	-2.29718	-4.59437	2.03578e-06
rs16944421	0.00690342	1.85514	0.999683	-2.30832	0.00690342	1.85514	0.999683	-2.30832	-4.61665	1.99092e-06
rs1876132	0.00685553	1.85485	0.999685	-2.31235	0.00685553	1.85485	0.999685	-2.31235	-4.62469	1.97497e-06
rs10520688	0.00693508	1.85057	0.999682	-2.31451	0.00693508	1.85057	0.999682	-2.31451	-4.62903	1.96642e-06
rs28508560	0.00465488	-1.95284	0.999786	-2.31917	0.00465488	-1.95284	0.999786	-2.31917	-4.63834	1.94821e-06
rs139824054	0.00695034	1.83622	0.999681	-2.33986	0.00695034	1.83622	0.999681	-2.33986	-4.67973	1.86921e-06
rs62020730	0.00695284	1.83584	0.999681	-2.34038	0.00695284	1.83584	0.999681	-2.34038	-4.68076	1.86729e-06
rs5814451	0.00395139	1.98115	0.999819	-2.34535	0.00395139	1.98115	0.999819	-2.34535	-4.69071	1.84881e-06
rs7177137	0.00689428	1.82984	0.999684	-2.35559	0.00689428	1.82984	0.999684	-2.35559	-4.71118	1.81133e-06
rs28863184	0.00694806	1.82182	0.999681	-2.36635	0.00694806	1.82182	0.999681	-2.36635	-4.7327	1.77278e-06
rs4773	0.00362303	1.97464	0.999834	-2.40155	0.00362303	1.97464	0.999834	-2.40155	-4.8031	1.65226e-06
rs1562976	0.00696722	1.8015	0.99968	-2.40178	0.00696722	1.8015	0.99968	-2.40178	-4.80356	1.65151e-06
rs1975689	0.00696833	1.80077	0.99968	-2.40301	0.00696833	1.80077	0.99968	-2.40301	-4.80603	1.64743e-06
rs8040392	0.00696597	1.79837	0.99968	-2.40751	0.00696597	1.79837	0.99968	-2.40751	-4.81501	1.6327e-06
rs6496649	0.00329959	1.98191	0.999849	-2.4339	0.00329959	1.98191	0.999849	-2.4339	-4.8678	1.54874e-06
rs3943505	0.00696552	1.78183	0.99968	-2.43713	0.00696552	1.78183	0.99968	-2.43713	-4.87426	1.53877e-06
rs62020727	0.00693684	1.77909	0.999682	-2.44407	0.00693684	1.77909	0.999682	-2.44407	-4.88815	1.51755e-06
rs1550636	0.00357264	1.95626	0.999836	-2.44467	0.00357264	1.95626	0.999836	-2.44467	-4.88934	1.51575e-06
rs75097655	0.00978483	1.67524	0.999551	-2.45163	0.00978483	1.67524	0.999551	-2.45163	-4.90326	1.49479e-06
rs4451921	0.00623757	1.79214	0.999714	-2.47384	0.00623757	1.79214	0.999714	-2.47384	-4.94767	1.42985e-06
rs12904679	0.00763678	1.73068	0.99965	-2.48099	0.00763678	1.73068	0.99965	-2.48099	-4.96198	1.40954e-06
rs11852792	0.00647256	1.77131	0.999703	-2.49246	0.00647256	1.77131	0.999703	-2.49246	-4.98493	1.37757e-06
rs4441248	0.00647256	1.76735	0.999703	-2.49948	0.00647256	1.76735	0.999703	-2.49948	-4.99895	1.35838e-06
rs7165454	0.00647524	1.76643	0.999703	-2.50088	0.00647524	1.76643	0.999703	-2.50088	-5.00177	1.35456e-06
rs4280212	0.00647248	1.76654	0.999703	-2.50091	0.00647248	1.76654	0.999703	-2.50091	-5.00183	1.35448e-06
rs1867220	0.0039264	1.89911	0.99982	-2.50766	0.0039264	1.89911	0.99982	-2.50766	-5.01531	1.33634e-06
rs1266489	0.00362344	1.91748	0.999834	-2.51271	0.00362344	1.91748	0.999834	-2.51271	-5.02542	1.32289e-06
rs36090584	0.00519054	1.81937	0.999762	-2.51646	0.00519054	1.81937	0.999762	-2.51646	-5.03291	1.31303e-06
rs734252	0.0035953	1.91433	0.999835	-2.52264	0.0035953	1.91433	0.999835	-2.52264	-5.04529	1.29688e-06
rs1867219	0.00392539	1.89115	0.99982	-2.52287	0.00392539	1.89115	0.99982	-2.52287	-5.04573	1.2963e-06
rs12906346	0.00621111	1.76521	0.999715	-2.52385	0.00621111	1.76521	0.999715	-2.52385	-5.0477	1.29376e-06
rs28455184	0.0066133	1.7473	0.999696	-2.52396	0.0066133	1.7473	0.999696	-2.52396	-5.04792	1.29347e-06
rs12161988	0.0064719	1.74811	0.999703	-2.53333	0.0064719	1.74811	0.999703	-2.53333	-5.06667	1.26944e-06
rs4932154	0.0040843	-1.87373	0.999813	-2.53583	0.0040843	-1.87373	0.999813	-2.53583	-5.07167	1.26311e-06
rs58714003	0.00647183	1.74572	0.999703	-2.53751	0.00647183	1.74572	0.999703	-2.53751	-5.07503	1.25887e-06
rs57111801	0.00597481	1.76505	0.999726	-2.54349	0.00597481	1.76505	0.999726	-2.54349	-5.08699	1.24391e-06
rs67409214	0.00646921	1.74104	0.999703	-2.54588	0.00646921	1.74104	0.999703	-2.54588	-5.09175	1.23799e-06
rs11638617	0.00646611	1.7349	0.999703	-2.55678	0.00646611	1.7349	0.999703	-2.55678	-5.11355	1.2113e-06
rs8034938	0.00671172	-1.7231	0.999692	-2.55856	0.00671172	-1.7231	0.999692	-2.55856	-5.11712	1.20699e-06
rs67820298	0.00625028	1.74116	0.999713	-2.56285	0.00625028	1.74116	0.999713	-2.56285	-5.1257	1.19667e-06
rs1266483	0.00361784	1.8868	0.999834	-2.57185	0.00361784	1.8868	0.999834	-2.57185	-5.14369	1.17533e-06
rs1256853	0.00547653	1.77116	0.999749	-2.57619	0.00547653	1.77116	0.999749	-2.57619	-5.15239	1.16516e-06
rs871078	0.00363328	1.87587	0.999833	-2.59028	0.00363328	1.87587	0.999833	-2.59028	-5.18056	1.13279e-06
rs66582975	0.00596796	1.73838	0.999726	-2.59078	0.00596796	1.73838	0.999726	-2.59078	-5.18156	1.13165e-06
rs12908391	0.00518029	-1.7678	0.999762	-2.60991	0.00518029	-1.7678	0.999762	-2.60991	-5.21982	1.08918e-06
rs2520089	0.00593045	1.72293	0.999728	-2.62065	0.00593045	1.72293	0.999728	-2.62065	-5.2413	1.06603e-06
rs28710946	0.0059941	1.71935	0.999725	-2.62148	0.0059941	1.71935	0.999725	-2.62148	-5.24296	1.06427e-06
rs12904427	0.00599677	1.71808	0.999725	-2.62344	0.00599677	1.71808	0.999725	-2.62344	-5.24689	1.06009e-06
rs12901778	0.0059808	1.71569	0.999725	-2.62888	0.0059808	1.71569	0.999725	-2.62888	-5.25775	1.04864e-06
rs3840033	0.00516487	1.75534	0.999763	-2.63334	0.00516487	1.75534	0.999763	-2.63334	-5.26669	1.03931e-06
rs6496623	0.00467777	1.78267	0.999785	-2.6345	0.00467777	1.78267	0.999785	-2.6345	-5.269	1.03691e-06
rs12902554	0.00598997	1.70979	0.999725	-2.63821	0.00598997	1.70979	0.999725	-2.63821	-5.27643	1.02924e-06
rs6496632	0.00519205	-1.74496	0.999762	-2.64888	0.00519205	-1.74496	0.999762	-2.64888	-5.29775	1.00752e-06
rs28455720	0.00596613	1.6994	0.999726	-2.65791	0.00596613	1.6994	0.999726	-2.65791	-5.31582	9.89484e-07
rs12905843	0.00582506	1.70588	0.999733	-2.65884	0.00582506	1.70588	0.999733	-2.65884	-5.31768	9.8764e-07
rs8035459	0.00511141	-1.74356	0.999765	-2.65915	0.00511141	-1.74356	0.999765	-2.65915	-5.3183	9.87029e-07
rs543529559	0.00632878	1.67708	0.99971	-2.66611	0.00632878	1.67708	0.99971	-2.66611	-5.33221	9.73395e-07
rs11630881	0.00599523	1.6919	0.999725	-2.66819	0.00599523	1.6919	0.999725	-2.66819	-5.33639	9.69337e-07
rs7166743	0.00388266	1.80901	0.999822	-2.68028	0.00388266	1.80901	0.999822	-2.68028	-5.36055	9.46193e-07
rs11631716	0.00619822	1.66806	0.999716	-2.69161	0.00619822	1.66806	0.999716	-2.69161	-5.38322	9.24986e-07
rs6496743	0.00387673	1.80268	0.999822	-2.69246	0.00387673	1.80268	0.999822	-2.69246	-5.38493	9.23412e-07
rs7169903	0.0038215	-1.80411	0.999825	-2.69705	0.0038215	-1.80411	0.999825	-2.69705	-5.39411	9.14971e-07
rs10152994	0.0059909	1.67297	0.999725	-2.7004	0.0059909	1.67297	0.999725	-2.7004	-5.40081	9.08861e-07
rs34445539	0.00598208	1.67293	0.999725	-2.7012	0.00598208	1.67293	0.999725	-2.7012	-5.40239	9.07421e-07
rs4395050	0.00523096	-1.71081	0.99976	-2.70415	0.00523096	-1.71081	0.99976	-2.70415	-5.40829	9.02082e-07
rs11636786	0.00607037	1.66184	0.999721	-2.71237	0.00607037	1.66184	0.999721	-2.71237	-5.42474	8.87364e-07
rs4544218	0.00387786	1.79055	0.999822	-2.71411	0.00387786	1.79055	0.999822	-2.71411	-5.42821	8.84292e-07
rs371522803	0.00523982	-1.6996	0.999759	-2.72242	0.00523982	-1.6996	0.999759	-2.72242	-5.44484	8.69712e-07
rs34601345	0.0049158	-1.71708	0.999774	-2.72445	0.0049158	-1.71708	0.999774	-2.72445	-5.4489	8.66184e-07
rs12593261	0.00389198	1.78262	0.999821	-2.72646	0.00389198	1.78262	0.999821	-2.72646	-5.45291	8.62718e-07
rs201978017	0.00337117	1.81507	0.999845	-2.73988	0.00337117	1.81507	0.999845	-2.73988	-5.47976	8.39867e-07
rs11853024	0.0038751	1.77014	0.999822	-2.75079	0.0038751	1.77014	0.999822	-2.75079	-5.50157	8.21744e-07
rs35389495	0.00523645	-1.67737	0.99976	-2.76026	0.00523645	-1.67737	0.99976	-2.76026	-5.52052	8.06318e-07
rs8031915	0.00387338	1.76329	0.999822	-2.76311	0.00387338	1.76329	0.999822	-2.76311	-5.52623	8.0173e-07
rs4508401	0.00387445	1.76165	0.999822	-2.76587	0.00387445	1.76165	0.999822	-2.76587	-5.53174	7.97326e-07
rs71757612	0.00387806	1.7608	0.999822	-2.7669	0.00387806	1.7608	0.999822	-2.7669	-5.53381	7.95676e-07
rs12595029	0.00387195	1.75793	0.999822	-2.77274	0.00387195	1.75793	0.999822	-2.77274	-5.54548	7.86444e-07
rs28745020	0.00358924	-1.77898	0.999835	-2.7734	0.00358924	-1.77898	0.999835	-2.7734	-5.54681	7.85401e-07
rs8037254	0.0038724	1.75741	0.999822	-2.77359	0.0038724	1.75741	0.999822	-2.77359	-5.54719	7.851e-07
rs7167128	0.00387905	1.75579	0.999822	-2.77558	0.00387905	1.75579	0.999822	-2.77558	-5.55116	7.81987e-07
rs1443256	0.00387236	1.74956	0.999822	-2.78736	0.00387236	1.74956	0.999822	-2.78736	-5.57472	7.63778e-07
rs9652515	0.00458367	-1.7003	0.99979	-2.78806	0.00458367	-1.7003	0.99979	-2.78806	-5.57612	7.62712e-07
rs6496740	0.00346678	1.77942	0.999841	-2.78996	0.00346678	1.77942	0.999841	-2.78996	-5.57993	7.59813e-07
rs6496747	0.00387262	1.73865	0.999822	-2.80635	0.00387262	1.73865	0.999822	-2.80635	-5.61269	7.35323e-07
rs11073957	0.00353568	1.75902	0.999838	-2.81622	0.00353568	1.75902	0.999838	-2.81622	-5.63243	7.20948e-07
rs12898311	0.00387008	1.73265	0.999822	-2.81709	0.00387008	1.73265	0.999822	-2.81709	-5.63418	7.19686e-07
rs908045	0.00332803	-1.7616	0.999847	-2.84192	0.00332803	-1.7616	0.999847	-2.84192	-5.68384	6.84826e-07
rs2238325	0.00374232	1.72333	0.999828	-2.84996	0.00374232	1.72333	0.999828	-2.84996	-5.69992	6.739e-07
rs7182658	0.00374763	1.72268	0.999828	-2.85037	0.00374763	1.72268	0.999828	-2.85037	-5.70074	6.73346e-07
rs1505936	0.00374234	1.72305	0.999828	-2.85044	0.00374234	1.72305	0.999828	-2.85044	-5.70089	6.73246e-07
rs8042680	0.00388144	1.70881	0.999822	-2.85664	0.00388144	1.70881	0.999822	-2.85664	-5.71327	6.6496e-07
rs12440774	0.00345243	1.74273	0.999842	-2.85664	0.00345243	1.74273	0.999842	-2.85664	-5.71329	6.64951e-07
rs2238327	0.00374256	1.71788	0.999828	-2.8593	0.00374256	1.71788	0.999828	-2.8593	-5.71861	6.61423e-07
rs1810246	0.00429275	1.67189	0.999803	-2.8687	0.00429275	1.67189	0.999803	-2.8687	-5.73741	6.49104e-07
rs2970346	0.00384069	-1.70394	0.999824	-2.87022	0.00384069	-1.70394	0.999824	-2.87022	-5.74043	6.47145e-07
rs8034050	0.00381661	1.7036	0.999825	-2.87395	0.00381661	1.7036	0.999825	-2.87395	-5.7479	6.42331e-07
rs7183871	0.00337482	1.73389	0.999845	-2.88337	0.00337482	1.73389	0.999845	-2.88337	-5.76673	6.30344e-07
rs12437718	0.00397637	1.68329	0.999817	-2.88783	0.00397637	1.68329	0.999817	-2.88783	-5.77567	6.24738e-07
rs8030390	0.00376568	1.69611	0.999827	-2.89338	0.00376568	1.69611	0.999827	-2.89338	-5.78677	6.17841e-07
rs60825716	0.00376434	1.69182	0.999827	-2.90084	0.00376434	1.69182	0.999827	-2.90084	-5.80167	6.08702e-07
rs11857774	0.00374635	1.68687	0.999828	-2.91158	0.00374635	1.68687	0.999828	-2.91158	-5.82316	5.9576e-07
rs4505290	0.00344767	1.70796	0.999842	-2.91731	0.00344767	1.70796	0.999842	-2.91731	-5.83462	5.88975e-07
rs10852140	0.00348484	1.70457	0.99984	-2.91773	0.00348484	1.70457	0.99984	-2.91773	-5.83546	5.88476e-07
rs2001217	0.00344919	1.70619	0.999842	-2.92011	0.00344919	1.70619	0.999842	-2.92011	-5.84022	5.85681e-07
rs4381579	0.00344905	1.70126	0.999842	-2.92852	0.00344905	1.70126	0.999842	-2.92852	-5.85705	5.75912e-07
rs2289619	0.00361123	1.68767	0.999834	-2.92859	0.00361123	1.68767	0.999834	-2.92859	-5.85718	5.75836e-07
rs4031435	0.00374398	1.66684	0.999828	-2.94547	0.00374398	1.66684	0.999828	-2.94547	-5.89095	5.56714e-07
rs10083661	0.00374696	1.65919	0.999828	-2.9578	0.00374696	1.65919	0.999828	-2.9578	-5.91561	5.43154e-07
rs4932379	0.00352905	1.677	0.999838	-2.95805	0.00352905	1.677	0.999838	-2.95805	-5.91609	5.42892e-07
rs12440447	0.00374702	1.65842	0.999828	-2.95906	0.00374702	1.65842	0.999828	-2.95906	-5.91813	5.41786e-07
rs2677749	0.00351575	1.66934	0.999839	-2.97273	0.00351575	1.66934	0.999839	-2.97273	-5.94546	5.27178e-07
rs11312707	0.00332666	-1.66613	0.999847	-3.00572	0.00332666	-1.66613	0.999847	-3.00572	-6.01143	4.93523e-07

## Sheet: MYH10
snp	V.df1	z.df1	r.df1	lABF.df1	V.df2	z.df2	r.df2	lABF.df2	internal.sum.lABF	SNP.PP.H4
rs200342089	5.46741	3.44779	0.799974	3.9501	5.46741	3.44779	0.799974	3.9501	7.9002	0.688473
rs562153647	0.205405	3.32674	0.990694	3.14356	0.205405	3.32674	0.990694	3.14356	6.28712	0.137194
rs3027205	7.23255	2.96799	0.751447	2.61368	7.23255	2.96799	0.751447	2.61368	5.22736	0.0475433
rs369753708	11.4089	2.72164	0.657132	1.89859	11.4089	2.72164	0.657132	1.89859	3.79718	0.0113755
rs577729599	5.34516	2.54225	0.803568	1.78303	5.34516	2.54225	0.803568	1.78303	3.56607	0.00902812
rs561318435	12.4673	2.62637	0.636875	1.69003	12.4673	2.62637	0.636875	1.69003	3.38005	0.00749571
rs147149459	0.3193	2.74987	0.985608	1.60596	0.3193	2.74987	0.985608	1.60596	3.21191	0.00633565
rs200997387	2.21781	2.42739	0.907913	1.4823	2.21781	2.42739	0.907913	1.4823	2.9646	0.00494746
rs142600353	0.124685	-2.85108	0.99433	1.455	0.124685	-2.85108	0.99433	1.455	2.91	0.00468458
rs190376413	0.190931	2.76197	0.991344	1.40649	0.190931	2.76197	0.991344	1.40649	2.81298	0.00425143
rs62620227	0.353304	-2.64202	0.984099	1.36394	0.353304	-2.64202	0.984099	1.36394	2.72788	0.00390462
rs530949904	4.27257	2.31429	0.836542	1.33464	4.27257	2.31429	0.836542	1.33464	2.66928	0.00368238
rs149021341	0.552617	2.52296	0.97535	1.25271	0.552617	2.52296	0.97535	1.25271	2.50542	0.00312582
rs112127634	0.0400336	-2.9709	0.998172	1.25266	0.0400336	-2.9709	0.998172	1.25266	2.50533	0.00312554
rs141817411	0.0491057	-2.93629	0.997759	1.25075	0.0491057	-2.93629	0.997759	1.25075	2.50149	0.00311358
rs116947685	0.149706	2.66573	0.9932	1.03347	0.149706	2.66573	0.9932	1.03347	2.06693	0.0020162
rs111782966	0.204961	2.60776	0.990714	1.02903	0.204961	2.60776	0.990714	1.02903	2.05805	0.00199836
rs71371876	0.154111	2.62651	0.993001	0.944124	0.154111	2.62651	0.993001	0.944124	1.88825	0.00168628
rs189141764	0.190541	2.57735	0.991361	0.91693	0.190541	2.57735	0.991361	0.91693	1.83386	0.00159702
rs34866481	0.145797	2.62517	0.993376	0.914381	0.145797	2.62517	0.993376	0.914381	1.82876	0.0015889
rs113571821	0.0127392	-3.04443	0.999418	0.907291	0.0127392	-3.04443	0.999418	0.907291	1.81458	0.00156653
rs2074258	0.00396554	3.21837	0.999819	0.870408	0.00396554	3.21837	0.999819	0.870408	1.74082	0.00145513
rs550442538	0.172428	2.56398	0.992176	0.835998	0.172428	2.56398	0.992176	0.835998	1.672	0.00135836
rs138732743	1.06337	2.22992	0.953624	0.835474	1.06337	2.22992	0.953624	0.835474	1.67095	0.00135693
rs143053789	0.24965	-2.48868	0.988712	0.81982	0.24965	-2.48868	0.988712	0.81982	1.63964	0.00131511
rs200952059	13.1485	2.00906	0.624484	0.770588	13.1485	2.00906	0.624484	0.770588	1.54118	0.00119179
rs142872108	0.0537563	-2.74001	0.997548	0.739275	0.0537563	-2.74001	0.997548	0.739275	1.47855	0.00111944
rs146014287	1.79667	2.09168	0.924072	0.732485	1.79667	2.09168	0.924072	0.732485	1.46497	0.00110434
rs758218109	7.61219	1.88212	0.741769	0.636869	7.61219	1.88212	0.741769	0.636869	1.27374	0.000912119
rs572355835	5.54136	1.88944	0.797815	0.624807	5.54136	1.88944	0.797815	0.624807	1.24961	0.000890379
rs111808546	0.203748	2.44027	0.990768	0.607424	0.203748	2.44027	0.990768	0.607424	1.21485	0.000859957
rs769107969	13.0478	1.85649	0.626286	0.587127	13.0478	1.85649	0.626286	0.587127	1.17425	0.000825746
rs74895707	13.375	1.85677	0.62047	0.585151	13.375	1.85677	0.62047	0.585151	1.1703	0.000822489
rs72809921	0.00523187	-3.08027	0.999761	0.57381	0.00523187	-3.08027	0.999761	0.57381	1.14762	0.000804043
rs28407649	0.0598365	2.65814	0.997271	0.571299	0.0598365	2.65814	0.997271	0.571299	1.1426	0.000800016
rs146664126	0.0504285	-2.68685	0.997699	0.564056	0.0504285	-2.68685	0.997699	0.564056	1.12811	0.000788511
rs145053802	1.25895	2.06281	0.945559	0.556438	1.25895	2.06281	0.945559	0.556438	1.11288	0.000776588
rs755569841	6.67452	1.80693	0.766139	0.524211	6.67452	1.80693	0.766139	0.524211	1.04842	0.000728112
rs374754590	7.35158	1.79302	0.748386	0.513077	7.35158	1.79302	0.748386	0.513077	1.02615	0.000712078
rs201469257	8.4194	1.75371	0.721999	0.470193	8.4194	1.75371	0.721999	0.470193	0.940385	0.00065355
rs113235000	0.0230375	2.78576	0.998948	0.447845	0.0230375	2.78576	0.998948	0.447845	0.89569	0.000624982
rs541299023	10.4861	1.718	0.675876	0.434118	10.4861	1.718	0.675876	0.434118	0.868236	0.000608058
rs201049617	7.84498	1.72521	0.735957	0.429409	7.84498	1.72521	0.735957	0.429409	0.858819	0.000602358
rs201999758	80.8627	2.18552	0.212852	0.388674	80.8627	2.18552	0.212852	0.388674	0.777349	0.00055523
rs113398141	0.130495	2.43648	0.994067	0.386959	0.130495	2.43648	0.994067	0.386959	0.773918	0.000553328
rs200467271	3.93467	1.76916	0.847498	0.386011	3.93467	1.76916	0.847498	0.386011	0.772021	0.00055228
rs200860507	5.28926	1.72863	0.805222	0.385124	5.28926	1.72863	0.805222	0.385124	0.770248	0.000551302
rs28704961	0.00337068	3.0875	0.999846	0.376737	0.00337068	3.0875	0.999846	0.376737	0.753475	0.000542132
rs199775758	6.35993	1.69529	0.774678	0.3681	6.35993	1.69529	0.774678	0.3681	0.736201	0.000532847
rs147410617	8.38473	1.66893	0.722826	0.365094	8.38473	1.66893	0.722826	0.365094	0.730188	0.000529653
rs148602477	2.99522	1.79491	0.879523	0.358627	2.99522	1.79491	0.879523	0.358627	0.717253	0.000522846
rs372929205	7.2886	1.67449	0.750002	0.358321	7.2886	1.67449	0.750002	0.358321	0.716643	0.000522527
rs147166962	5.81553	1.6892	0.789914	0.346854	5.81553	1.6892	0.789914	0.346854	0.693708	0.000510679
rs142451736	43.0592	1.79675	0.336788	0.3383	43.0592	1.79675	0.336788	0.3383	0.676599	0.000502016
rs28755912	0.0033701	3.07397	0.999846	0.33497	0.0033701	3.07397	0.999846	0.33497	0.669939	0.000498684
rs117420321	0.0278596	-2.69849	0.998728	0.302892	0.0278596	-2.69849	0.998728	0.302892	0.605784	0.000467696
rs373763703	45.8772	1.74158	0.322778	0.294632	45.8772	1.74158	0.322778	0.294632	0.589264	0.000460033
rs201254943	0.153409	2.35389	0.993033	0.267812	0.153409	2.35389	0.993033	0.267812	0.535624	0.000436007
rs195773	0.00399131	3.02287	0.999817	0.263648	0.00399131	3.02287	0.999817	0.263648	0.527297	0.000432391
rs369372561	2.07236	1.79975	0.913429	0.25594	2.07236	1.79975	0.913429	0.25594	0.51188	0.000425776
rs72846934	0.0386594	2.60857	0.998235	0.22648	0.0386594	2.60857	0.998235	0.22648	0.45296	0.000401414
rs4065334	0.0387196	2.60587	0.998232	0.220223	0.0387196	2.60587	0.998232	0.220223	0.440445	0.000396422
rs112438926	0.0130261	-2.80382	0.999405	0.215208	0.0130261	-2.80382	0.999405	0.215208	0.430416	0.000392466
rs144247363	2.94068	1.70236	0.881457	0.21101	2.94068	1.70236	0.881457	0.21101	0.42202	0.000389185
rs201587670	3.38593	1.6683	0.865914	0.200385	3.38593	1.6683	0.865914	0.200385	0.40077	0.000381002
rs9910718	0.00338617	3.02862	0.999845	0.198995	0.00338617	3.02862	0.999845	0.198995	0.397991	0.000379944
rs112608515	0.0600314	-2.50712	0.997262	0.183938	0.0600314	-2.50712	0.997262	0.183938	0.367876	0.000368673
rs369775048	0.11765	2.36981	0.994648	0.177791	0.11765	2.36981	0.994648	0.177791	0.355583	0.000364168
rs35824504	0.0483116	2.5441	0.997795	0.170479	0.0483116	2.5441	0.997795	0.170479	0.340958	0.000358881
rs12952302	0.0595384	2.50307	0.997285	0.169783	0.0595384	2.50307	0.997285	0.169783	0.339566	0.000358382
rs149772710	0.0831423	-2.43546	0.996212	0.16653	0.0831423	-2.43546	0.996212	0.16653	0.33306	0.000356058
rs72846935	0.0386775	2.57239	0.998234	0.133158	0.0386775	2.57239	0.998234	0.133158	0.266316	0.000333069
rs3884450	0.00362511	2.9931	0.999834	0.126083	0.00362511	2.9931	0.999834	0.126083	0.252165	0.000328389
rs563014439	140.081	1.66141	0.135019	0.113822	140.081	1.66141	0.135019	0.113822	0.227644	0.000320435
rs16957654	0.00337035	2.99376	0.999846	0.0917027	0.00337035	2.99376	0.999846	0.0917027	0.183405	0.000306568
rs195770	0.00395265	2.96572	0.999819	0.0877046	0.00395265	2.96572	0.999819	0.0877046	0.175409	0.000304126
rs12944180	0.00338903	2.9872	0.999845	0.0748376	0.00338903	2.9872	0.999845	0.0748376	0.149675	0.0002964
rs150994580	392.024	1.8572	0.0528306	0.0639732	392.024	1.8572	0.0528306	0.0639732	0.127946	0.000290029
rs201714597	409.986	1.8654	0.0506333	0.0621146	409.986	1.8654	0.0506333	0.0621146	0.124229	0.000288953
rs72846938	0.0387377	2.53739	0.998232	0.0446631	0.0387377	2.53739	0.998232	0.0446631	0.0893261	0.000279041
rs34310002	0.0230727	2.62247	0.998946	0.00749646	0.0230727	2.62247	0.998946	0.00749646	0.0149929	0.000259051
rs74844184	0.0112942	-2.75266	0.999484	0.00214717	0.0112942	-2.75266	0.999484	0.00214717	0.00429433	0.000256295
rs195772	0.00531685	2.88581	0.999757	0.00192067	0.00531685	2.88581	0.999757	0.00192067	0.00384133	0.000256179
rs368241309	0.158758	2.22431	0.992792	-0.0103147	0.158758	2.22431	0.992792	-0.0103147	-0.0206294	0.000249986
rs570333800	0.00472739	2.90149	0.999784	-0.0113485	0.00472739	2.90149	0.999784	-0.0113485	-0.0226969	0.00024947
rs73256640	0.028218	2.56919	0.998711	-0.0309064	0.028218	2.56919	0.998711	-0.0309064	-0.0618128	0.0002399
rs3890898	0.00371732	2.93155	0.99983	-0.043668	0.00371732	2.93155	0.99983	-0.043668	-0.0873359	0.000233854
rs192291786	0.108587	2.28968	0.995059	-0.0466813	0.108587	2.28968	0.995059	-0.0466813	-0.0933626	0.000232449
rs72846932	0.0387515	2.49628	0.998231	-0.0584474	0.0387515	2.49628	0.998231	-0.0584474	-0.116895	0.000227043
rs58724259	0.00557285	-2.85563	0.999745	-0.0612499	0.00557285	-2.85563	0.999745	-0.0612499	-0.1225	0.000225774
rs34374806	0.152804	2.20411	0.99306	-0.0730547	0.152804	2.20411	0.99306	-0.0730547	-0.146109	0.000220506
rs187977746	0.143192	2.21793	0.993494	-0.0739016	0.143192	2.21793	0.993494	-0.0739016	-0.147803	0.000220133
rs183351994	0.166492	2.18405	0.992443	-0.0756491	0.166492	2.18405	0.992443	-0.0756491	-0.151298	0.000219365
rs12602623	0.00422674	-2.89697	0.999807	-0.0803139	0.00422674	-2.89697	0.999807	-0.0803139	-0.160628	0.000217328
rs190254382	0.125656	-2.24032	0.994286	-0.087256	0.125656	-2.24032	0.994286	-0.087256	-0.174512	0.000214331
rs114874248	0.0388362	2.48065	0.998227	-0.0961894	0.0388362	2.48065	0.998227	-0.0961894	-0.192379	0.000210536
rs9788994	0.00422678	-2.88639	0.999807	-0.110898	0.00422678	-2.88639	0.999807	-0.110898	-0.221797	0.000204432
rs140564492	0.0595409	2.38312	0.997284	-0.122465	0.0595409	2.38312	0.997284	-0.122465	-0.24493	0.000199757
rs113438381	0.011461	-2.70393	0.999476	-0.123428	0.011461	-2.70393	0.999476	-0.123428	-0.246855	0.000199373
rs196448	0.00368201	2.90533	0.999832	-0.124952	0.00368201	2.90533	0.999832	-0.124952	-0.249903	0.000198766
rs3814968	0.00423051	-2.87872	0.999807	-0.132561	0.00423051	-2.87872	0.999807	-0.132561	-0.265123	0.000195764
rs548645181	0.335852	1.99527	0.984873	-0.135202	0.335852	1.99527	0.984873	-0.135202	-0.270404	0.000194733
rs149753275	0.0581885	2.38182	0.997346	-0.136833	0.0581885	2.38182	0.997346	-0.136833	-0.273665	0.000194099
rs567896801	1.71503	1.5868	0.927271	-0.143102	1.71503	1.5868	0.927271	-0.143102	-0.286203	0.000191681
rs35846942	0.0444733	2.43371	0.99797	-0.144453	0.0444733	2.43371	0.99797	-0.144453	-0.288906	0.000191163
rs12604012	0.00555936	-2.82583	0.999746	-0.147088	0.00555936	-2.82583	0.999746	-0.147088	-0.294177	0.000190158
rs34709981	0.0286371	2.51907	0.998692	-0.150936	0.0286371	2.51907	0.998692	-0.150936	-0.301872	0.000188701
rs149742	0.00532791	2.82073	0.999756	-0.182704	0.00532791	2.82073	0.999756	-0.182704	-0.365407	0.000177084
rs146453555	0.13389	2.18091	0.993914	-0.187188	0.13389	2.18091	0.993914	-0.187188	-0.374376	0.000175503
rs79193749	0.0112182	-2.68369	0.999487	-0.188576	0.0112182	-2.68369	0.999487	-0.188576	-0.377153	0.000175017
rs560020670	0.0599564	2.33302	0.997266	-0.236859	0.0599564	2.33302	0.997266	-0.236859	-0.473718	0.000158906
rs75408115	0.100891	2.2018	0.995407	-0.278802	0.100891	2.2018	0.995407	-0.278802	-0.557604	0.00014612
rs61759659	0.669852	1.73988	0.970276	-0.289295	0.669852	1.73988	0.970276	-0.289295	-0.578589	0.000143086
rs181006375	0.111583	2.17378	0.994923	-0.290846	0.111583	2.17378	0.994923	-0.290846	-0.581692	0.000142642
rs12948724	0.00352724	2.85485	0.999839	-0.291753	0.00352724	2.85485	0.999839	-0.291753	-0.583506	0.000142384
rs201673587	0.614846	1.75617	0.97265	-0.299633	0.614846	1.75617	0.97265	-0.299633	-0.599266	0.000140158
rs72846942	0.0381925	2.39484	0.998256	-0.313259	0.0381925	2.39484	0.998256	-0.313259	-0.626519	0.00013639
rs1005898	0.00351409	2.84632	0.999839	-0.31793	0.00351409	2.84632	0.999839	-0.31793	-0.635861	0.000135121
rs71371872	0.054942	2.31513	0.997494	-0.32127	0.054942	2.31513	0.997494	-0.32127	-0.64254	0.000134222
rs2157832	0.00424567	-2.79488	0.999806	-0.368575	0.00424567	-2.79488	0.999806	-0.368575	-0.73715	0.000122105
rs56289873	0.00436382	-2.78795	0.9998	-0.374204	0.00436382	-2.78795	0.9998	-0.374204	-0.748407	0.000120738
rs201106247	0.0138964	2.57107	0.999365	-0.377757	0.0138964	2.57107	0.999365	-0.377757	-0.755513	0.000119884
rs56328484	0.00442456	-2.78416	0.999798	-0.377875	0.00442456	-2.78416	0.999798	-0.377875	-0.75575	0.000119855
rs190423989	0.112249	2.13145	0.994893	-0.37861	0.112249	2.13145	0.994893	-0.37861	-0.75722	0.000119679
rs77389834	0.0982221	2.14772	0.995528	-0.408928	0.0982221	2.14772	0.995528	-0.408928	-0.817855	0.000112638
rs140151819	0.0599006	-2.25625	0.997268	-0.412984	0.0599006	-2.25625	0.997268	-0.412984	-0.825968	0.000111728
rs3848438	0.00350908	2.81263	0.99984	-0.413948	0.00350908	2.81263	0.99984	-0.413948	-0.827895	0.000111513
rs79235239	0.0388181	2.34448	0.998228	-0.424372	0.0388181	2.34448	0.998228	-0.424372	-0.848745	0.000109212
rs28452369	0.0114809	-2.58618	0.999475	-0.433847	0.0114809	-2.58618	0.999475	-0.433847	-0.867694	0.000107162
rs184105179	0.103124	2.11794	0.995306	-0.448425	0.103124	2.11794	0.995306	-0.448425	-0.896851	0.000104082
rs12952560	0.0034802	2.7999	0.999841	-0.453787	0.0034802	2.7999	0.999841	-0.453787	-0.907574	0.000102972
rs72844605	0.0044678	-2.75094	0.999796	-0.464947	0.0044678	-2.75094	0.999796	-0.464947	-0.929893	0.000100699
rs3890897	0.00350518	2.78347	0.99984	-0.496083	0.00350518	2.78347	0.99984	-0.496083	-0.992166	9.46199e-05
rs12946387	0.00349015	2.76906	0.99984	-0.538225	0.00349015	2.76906	0.99984	-0.538225	-1.07645	8.69718e-05
rs144904249	0.054742	2.21787	0.997503	-0.542949	0.054742	2.21787	0.997503	-0.542949	-1.0859	8.61539e-05
rs3027295	0.131961	2.00756	0.994001	-0.555038	0.131961	2.00756	0.994001	-0.555038	-1.11008	8.4096e-05
rs376102792	0.177899	1.93204	0.99193	-0.558456	0.177899	1.93204	0.99193	-0.558456	-1.11691	8.3523e-05
rs2074257	0.0434543	2.25781	0.998017	-0.567678	0.0434543	2.25781	0.998017	-0.567678	-1.13536	8.19966e-05
rs12940048	0.0518286	2.21869	0.997635	-0.568093	0.0518286	2.21869	0.997635	-0.568093	-1.13619	8.19286e-05
rs116773583	0.135007	1.9916	0.993864	-0.575703	0.135007	1.9916	0.993864	-0.575703	-1.15141	8.06911e-05
rs146157977	0.0788368	2.10712	0.996408	-0.602445	0.0788368	2.10712	0.996408	-0.602445	-1.20489	7.64887e-05
rs196449	0.00474794	2.68114	0.999783	-0.624114	0.00474794	2.68114	0.999783	-0.624114	-1.24823	7.32448e-05
rs9906022	0.05185	2.18605	0.997634	-0.639594	0.05185	2.18605	0.997634	-0.639594	-1.27919	7.10117e-05
rs35247336	0.0519813	2.18197	0.997628	-0.647241	0.0519813	2.18197	0.997628	-0.647241	-1.29448	6.9934e-05
rs12452942	0.00429332	-2.68936	0.999804	-0.652296	0.00429332	-2.68936	0.999804	-0.652296	-1.30459	6.92306e-05
rs200680073	0.0101117	2.5187	0.999538	-0.669269	0.0101117	2.5187	0.999538	-0.669269	-1.33854	6.69199e-05
rs150332952	0.0613895	-2.13264	0.9972	-0.671427	0.0613895	-2.13264	0.9972	-0.671427	-1.34285	6.66316e-05
rs72807998	0.00429016	-2.68062	0.999804	-0.676114	0.00429016	-2.68062	0.999804	-0.676114	-1.35223	6.601e-05
rs12451165	0.00429422	-2.67821	0.999804	-0.682105	0.00429422	-2.67821	0.999804	-0.682105	-1.36421	6.52238e-05
rs112841248	0.0119465	2.47809	0.999454	-0.687617	0.0119465	2.47809	0.999454	-0.687617	-1.37523	6.45087e-05
rs56116452	0.0042572	-2.67428	0.999805	-0.696958	0.0042572	-2.67428	0.999805	-0.696958	-1.39392	6.33147e-05
rs148539919	0.0539001	-2.15013	0.997541	-0.698172	0.0539001	-2.15013	0.997541	-0.698172	-1.39634	6.31612e-05
rs78024556	0.127506	-1.94144	0.994203	-0.701504	0.127506	-1.94144	0.994203	-0.701504	-1.40301	6.27417e-05
rs66895439	0.0513009	2.15369	0.997659	-0.714904	0.0513009	2.15369	0.997659	-0.714904	-1.42981	6.10825e-05
rs12945801	0.00352107	2.70215	0.999839	-0.716815	0.00352107	2.70215	0.999839	-0.716815	-1.43363	6.08495e-05
rs540701238	0.114607	1.94773	0.994786	-0.741271	0.114607	1.94773	0.994786	-0.741271	-1.48254	5.79448e-05
rs141777945	0.391046	-1.613	0.98243	-0.742763	0.391046	-1.613	0.98243	-0.742763	-1.48553	5.77722e-05
rs546955370	0.0100132	2.49034	0.999542	-0.745154	0.0100132	2.49034	0.999542	-0.745154	-1.49031	5.74966e-05
rs117020765	0.0291989	-2.26624	0.998666	-0.74544	0.0291989	-2.26624	0.998666	-0.74544	-1.49088	5.74638e-05
rs72807993	0.0119137	2.44983	0.999455	-0.758572	0.0119137	2.44983	0.999455	-0.758572	-1.51714	5.59742e-05
rs118132252	0.120093	-1.92615	0.994538	-0.76005	0.120093	-1.92615	0.994538	-0.76005	-1.5201	5.58089e-05
rs185949225	0.116863	-1.93035	0.994684	-0.765295	0.116863	-1.93035	0.994684	-0.765295	-1.53059	5.52265e-05
rs181202302	0.157169	1.84549	0.992863	-0.780506	0.157169	1.84549	0.992863	-0.780506	-1.56101	5.35718e-05
rs144771853	0.140832	1.8676	0.993601	-0.792964	0.140832	1.8676	0.993601	-0.792964	-1.58593	5.22534e-05
rs180945045	0.151495	1.84589	0.993119	-0.797589	0.151495	1.84589	0.993119	-0.797589	-1.59518	5.17723e-05
rs180888595	0.12265	1.89665	0.994422	-0.805869	0.12265	1.89665	0.994422	-0.805869	-1.61174	5.0922e-05
rs11304892	0.0056393	2.57916	0.999742	-0.806411	0.0056393	2.57916	0.999742	-0.806411	-1.61282	5.08668e-05
rs11078772	0.00376302	-2.65048	0.999828	-0.82189	0.00376302	-2.65048	0.999828	-0.82189	-1.64378	4.93162e-05
rs141181079	0.276037	-1.66278	0.987533	-0.827164	0.276037	-1.66278	0.987533	-0.827164	-1.65433	4.87988e-05
rs8070809	0.00556519	2.56998	0.999746	-0.83665	0.00556519	2.56998	0.999746	-0.83665	-1.6733	4.78818e-05
rs72841770	0.0117012	2.42131	0.999465	-0.836964	0.0117012	2.42131	0.999465	-0.836964	-1.67393	4.78517e-05
rs76698348	0.044728	2.12824	0.997959	-0.836982	0.044728	2.12824	0.997959	-0.836982	-1.67396	4.78499e-05
rs148138632	0.011592	-2.42298	0.99947	-0.837584	0.011592	-2.42298	0.99947	-0.837584	-1.67517	4.77924e-05
rs12945167	0.00556231	2.56677	0.999746	-0.84515	0.00556231	2.56677	0.999746	-0.84515	-1.6903	4.70746e-05
rs9903136	0.00556243	2.56661	0.999746	-0.845554	0.00556243	2.56661	0.999746	-0.845554	-1.69111	4.70366e-05
rs149745	0.00589538	2.55284	0.99973	-0.851765	0.00589538	2.55284	0.99973	-0.851765	-1.70353	4.64559e-05
rs149622714	0.00960188	2.45257	0.999561	-0.859365	0.00960188	2.45257	0.999561	-0.859365	-1.71873	4.57551e-05
rs199844919	0.0466266	-2.10771	0.997872	-0.85984	0.0466266	-2.10771	0.997872	-0.85984	-1.71968	4.57116e-05
rs12943353	0.0055613	2.56098	0.999746	-0.860074	0.0055613	2.56098	0.999746	-0.860074	-1.72015	4.56903e-05
rs144086446	0.10723	1.90005	0.99512	-0.865019	0.10723	1.90005	0.99512	-0.865019	-1.73004	4.52406e-05
rs9891154	0.00557222	2.55799	0.999745	-0.866755	0.00557222	2.55799	0.999745	-0.866755	-1.73351	4.50838e-05
rs61537145	0.0321295	2.18993	0.998533	-0.867807	0.0321295	2.18993	0.998533	-0.867807	-1.73561	4.49891e-05
rs9892615	0.00557185	2.55719	0.999745	-0.86883	0.00557185	2.55719	0.999745	-0.86883	-1.73766	4.48971e-05
rs12951637	0.00423381	2.60956	0.999806	-0.870652	0.00423381	2.60956	0.999806	-0.870652	-1.7413	4.47338e-05
rs541780191	0.208172	1.71737	0.990569	-0.871129	0.208172	1.71737	0.990569	-0.871129	-1.74226	4.46911e-05
rs146833910	0.153825	-1.8008	0.993014	-0.871838	0.153825	-1.8008	0.993014	-0.871838	-1.74368	4.46278e-05
rs116965141	0.12405	1.8582	0.994359	-0.872113	0.12405	1.8582	0.994359	-0.872113	-1.74423	4.46033e-05
rs7342923	0.00971476	2.44159	0.999556	-0.880378	0.00971476	2.44159	0.999556	-0.880378	-1.76076	4.3872e-05
rs149780110	0.208192	1.71147	0.990569	-0.881098	0.208192	1.71147	0.990569	-0.881098	-1.7622	4.3809e-05
rs34694079	0.0853966	1.9472	0.99611	-0.886232	0.0853966	1.9472	0.99611	-0.886232	-1.77246	4.33614e-05
rs12944785	0.00414982	2.60639	0.99981	-0.88893	0.00414982	2.60639	0.99981	-0.88893	-1.77786	4.31281e-05
rs75387433	0.0322874	2.17528	0.998526	-0.897306	0.0322874	2.17528	0.998526	-0.897306	-1.79461	4.24116e-05
rs149721	0.00356501	2.62978	0.999837	-0.903541	0.00356501	2.62978	0.999837	-0.903541	-1.80708	4.1886e-05
rs186807386	0.211432	1.69329	0.990423	-0.904318	0.211432	1.69329	0.990423	-0.904318	-1.80864	4.18209e-05
rs72846915	0.0313311	2.17886	0.998569	-0.90444	0.0313311	2.17886	0.998569	-0.90444	-1.80888	4.18108e-05
rs117115785	0.0917393	1.91377	0.995822	-0.915364	0.0917393	1.91377	0.995822	-0.915364	-1.83073	4.09072e-05
rs191304849	0.135351	1.81023	0.993848	-0.917105	0.135351	1.81023	0.993848	-0.917105	-1.83421	4.0765e-05
rs7219356	0.16976	-1.7476	0.992296	-0.917738	0.16976	-1.7476	0.992296	-0.917738	-1.83548	4.07134e-05
rs117996580	0.104033	1.87934	0.995265	-0.918764	0.104033	1.87934	0.995265	-0.918764	-1.83753	4.06299e-05
rs140515501	0.101201	1.88286	0.995393	-0.925687	0.101201	1.88286	0.995393	-0.925687	-1.85137	4.00713e-05
rs185449060	0.101403	-1.87332	0.995384	-0.942552	0.101403	-1.87332	0.995384	-0.942552	-1.8851	3.87422e-05
rs138084644	0.0856692	1.91547	0.996097	-0.945698	0.0856692	1.91547	0.996097	-0.945698	-1.8914	3.84992e-05
rs112916972	0.134234	-1.79407	0.993899	-0.950084	0.134234	-1.79407	0.993899	-0.950084	-1.90017	3.8163e-05
rs195768	0.00415857	2.58188	0.99981	-0.951424	0.00415857	2.58188	0.99981	-0.951424	-1.90285	3.80608e-05
rs201194405	0.00962983	2.41068	0.99956	-0.959726	0.00962983	2.41068	0.99956	-0.959726	-1.91945	3.74341e-05
rs12949852	0.00351161	2.60252	0.999839	-0.982387	0.00351161	2.60252	0.999839	-0.982387	-1.96477	3.57754e-05
rs547338998	0.182572	-1.68458	0.99172	-0.989769	0.182572	-1.68458	0.99172	-0.989769	-1.97954	3.52511e-05
rs116982102	0.0794169	1.89204	0.996381	-1.02736	0.0794169	1.89204	0.996381	-1.02736	-2.05473	3.26977e-05
rs34781533	0.00344033	2.58892	0.999843	-1.02793	0.00344033	2.58892	0.999843	-1.02793	-2.05586	3.26609e-05
rs754261622	0.0284307	-2.14184	0.998701	-1.03249	0.0284307	-2.14184	0.998701	-1.03249	-2.06498	3.23642e-05
rs56042008	0.00433221	-2.53671	0.999802	-1.04659	0.00433221	-2.53671	0.999802	-1.04659	-2.09319	3.14641e-05
rs188823801	0.116589	1.77806	0.994696	-1.04731	0.116589	1.77806	0.994696	-1.04731	-2.09463	3.14187e-05
rs140626768	0.0877978	1.85367	0.996001	-1.04966	0.0877978	1.85367	0.996001	-1.04966	-2.09933	3.12715e-05
rs9901445	0.030316	-2.11399	0.998615	-1.05981	0.030316	-2.11399	0.998615	-1.05981	-2.11962	3.06433e-05
rs28626519	0.00345958	2.5713	0.999842	-1.07059	0.00345958	2.5713	0.999842	-1.07059	-2.14118	2.99895e-05
rs140693440	0.0778616	-1.87307	0.996452	-1.07268	0.0778616	-1.87307	0.996452	-1.07268	-2.14537	2.98644e-05
rs28390979	0.00429315	2.52672	0.999804	-1.0764	0.00429315	2.52672	0.999804	-1.0764	-2.15281	2.9643e-05
rs538689772	0.080864	1.8582	0.996315	-1.08171	0.080864	1.8582	0.996315	-1.08171	-2.16341	2.93303e-05
rs3848440	0.0042227	2.52672	0.999807	-1.08467	0.0042227	2.52672	0.999807	-1.08467	-2.16933	2.91571e-05
rs191199322	0.0907708	-1.82224	0.995866	-1.09083	0.0907708	-1.82224	0.995866	-1.09083	-2.18165	2.88001e-05
rs62065103	0.148288	-1.68139	0.993264	-1.09613	0.148288	-1.68139	0.993264	-1.09613	-2.19225	2.84964e-05
rs188779114	0.091473	-1.81496	0.995834	-1.10024	0.091473	-1.81496	0.995834	-1.10024	-2.20047	2.82632e-05
rs72844603	0.00929917	2.35704	0.999575	-1.10495	0.00929917	2.35704	0.999575	-1.10495	-2.20989	2.79982e-05
rs147866885	0.146811	-1.67593	0.993331	-1.11011	0.146811	-1.67593	0.993331	-1.11011	-2.22022	2.77106e-05
rs72807981	0.0122678	2.28509	0.999439	-1.13377	0.0122678	2.28509	0.999439	-1.13377	-2.26755	2.64296e-05
rs536492117	0.104098	1.76046	0.995262	-1.13379	0.104098	1.76046	0.995262	-1.13379	-2.26758	2.64288e-05
rs78427353	0.00945492	2.34073	0.999568	-1.13497	0.00945492	2.34073	0.999568	-1.13497	-2.26995	2.63663e-05
rs142173407	0.083324	1.81403	0.996204	-1.14777	0.083324	1.81403	0.996204	-1.14777	-2.29555	2.56999e-05
rs553790929	0.103394	1.75386	0.995294	-1.14866	0.103394	1.75386	0.995294	-1.14866	-2.29732	2.56544e-05
rs60165661	0.0123194	2.27049	0.999437	-1.16494	0.0123194	2.27049	0.999437	-1.16494	-2.32987	2.48327e-05
rs138928747	0.104701	1.73814	0.995235	-1.16981	0.104701	1.73814	0.995235	-1.16981	-2.33962	2.45917e-05
rs72807977	0.0123421	2.26678	0.999436	-1.17242	0.0123421	2.26678	0.999436	-1.17242	-2.34484	2.44637e-05
rs118086788	0.0492609	-1.93813	0.997752	-1.17495	0.0492609	-1.93813	0.997752	-1.17495	-2.34991	2.43401e-05
rs72844606	0.0123641	2.26363	0.999435	-1.17867	0.0123641	2.26363	0.999435	-1.17867	-2.35734	2.416e-05
rs74579703	0.0528738	-1.91764	0.997588	-1.17936	0.0528738	-1.91764	0.997588	-1.17936	-2.35872	2.41265e-05
rs443141	0.00488254	2.45732	0.999777	-1.18508	0.00488254	2.45732	0.999777	-1.18508	-2.37016	2.38523e-05
rs35782948	0.0474904	1.94186	0.997833	-1.18583	0.0474904	1.94186	0.997833	-1.18583	-2.37167	2.38163e-05
rs11402428	0.00594523	2.41204	0.999728	-1.19701	0.00594523	2.41204	0.999728	-1.19701	-2.39402	2.32897e-05
rs77817723	0.104239	1.72158	0.995255	-1.20049	0.104239	1.72158	0.995255	-1.20049	-2.40098	2.31282e-05
rs751660934	0.16518	1.58306	0.992502	-1.20294	0.16518	1.58306	0.992502	-1.20294	-2.40588	2.30152e-05
rs112987547	0.0156015	2.1942	0.999287	-1.21747	0.0156015	2.1942	0.999287	-1.21747	-2.43495	2.23558e-05
rs545006382	0.104051	-1.70947	0.995264	-1.22205	0.104051	-1.70947	0.995264	-1.22205	-2.44409	2.21523e-05
rs141721761	0.113484	1.67502	0.994837	-1.23749	0.113484	1.67502	0.994837	-1.23749	-2.47499	2.14784e-05
rs12386050	0.0416209	1.94135	0.9981	-1.25215	0.0416209	1.94135	0.9981	-1.25215	-2.5043	2.08578e-05
rs80123644	0.00619807	2.37798	0.999717	-1.25778	0.00619807	2.37798	0.999717	-1.25778	-2.51556	2.06244e-05
rs72807997	0.0123097	2.22082	0.999437	-1.2768	0.0123097	2.22082	0.999437	-1.2768	-2.55359	1.98547e-05
rs139661032	0.141751	-1.57239	0.993559	-1.29429	0.141751	-1.57239	0.993559	-1.29429	-2.58859	1.91719e-05
rs112515680	0.101681	-1.6694	0.995371	-1.30074	0.101681	-1.6694	0.995371	-1.30074	-2.60149	1.89262e-05
rs72811936	0.0139909	-2.1779	0.999361	-1.30737	0.0139909	-2.1779	0.999361	-1.30737	-2.61473	1.86772e-05
rs76215666	0.126713	-1.59658	0.994238	-1.31108	0.126713	-1.59658	0.994238	-1.31108	-2.62216	1.8539e-05
rs7216811	0.00357062	2.46807	0.999837	-1.31486	0.00357062	2.46807	0.999837	-1.31486	-2.62972	1.83993e-05
rs550795550	0.100834	-1.6613	0.99541	-1.31828	0.100834	-1.6613	0.99541	-1.31828	-2.63655	1.8274e-05
rs195771	0.00341584	2.46316	0.999844	-1.3491	0.00341584	2.46316	0.999844	-1.3491	-2.6982	1.71814e-05
rs116946430	0.110257	-1.61136	0.994983	-1.35573	0.110257	-1.61136	0.994983	-1.35573	-2.71146	1.69552e-05
rs149743	0.00420914	2.41663	0.999808	-1.35832	0.00420914	2.41663	0.999808	-1.35832	-2.71664	1.68676e-05
rs149744	0.00420851	2.41529	0.999808	-1.36164	0.00420851	2.41529	0.999808	-1.36164	-2.72328	1.67559e-05
rs78171661	0.0123015	2.17716	0.999438	-1.37309	0.0123015	2.17716	0.999438	-1.37309	-2.74618	1.63766e-05
rs74252626	0.0325911	1.94045	0.998512	-1.3752	0.0325911	1.94045	0.998512	-1.3752	-2.75041	1.63075e-05
rs78490476	0.0419512	1.87387	0.998085	-1.37671	0.0419512	1.87387	0.998085	-1.37671	-2.75342	1.62585e-05
rs72841787	0.0329771	1.93301	0.998494	-1.38374	0.0329771	1.93301	0.998494	-1.38374	-2.76748	1.60315e-05
rs72807989	0.0122902	2.17241	0.999438	-1.38388	0.0122902	2.17241	0.999438	-1.38388	-2.76776	1.6027e-05
rs72807988	0.0122868	2.17224	0.999438	-1.38438	0.0122868	2.17224	0.999438	-1.38438	-2.76875	1.60111e-05
rs140947985	0.041328	1.8512	0.998114	-1.42627	0.041328	1.8512	0.998114	-1.42627	-2.85254	1.47242e-05
rs1561	0.013179	-2.13039	0.999398	-1.43941	0.013179	-2.13039	0.999398	-1.43941	-2.87883	1.43422e-05
rs76261061	0.0406035	-1.84454	0.998147	-1.44733	0.0406035	-1.84454	0.998147	-1.44733	-2.89466	1.41169e-05
rs140679573	0.0805197	1.649	0.996331	-1.44932	0.0805197	1.649	0.996331	-1.44932	-2.89864	1.40608e-05
rs75096475	0.0326026	1.89994	0.998511	-1.45269	0.0326026	1.89994	0.998511	-1.45269	-2.90539	1.39663e-05
rs9900891	0.0314867	1.9047	0.998562	-1.46095	0.0314867	1.9047	0.998562	-1.46095	-2.92191	1.37374e-05
rs35154567	0.00368678	2.39757	0.999831	-1.47036	0.00368678	2.39757	0.999831	-1.47036	-2.94072	1.34815e-05
rs75699931	0.0375596	1.85227	0.998285	-1.47173	0.0375596	1.85227	0.998285	-1.47173	-2.94347	1.34445e-05
rs147499174	0.0374852	1.84861	0.998289	-1.47948	0.0374852	1.84861	0.998289	-1.47948	-2.95895	1.32379e-05
rs118068793	0.0862421	1.60602	0.996071	-1.48514	0.0862421	1.60602	0.996071	-1.48514	-2.97029	1.30886e-05
rs79117431	0.037479	1.84533	0.998289	-1.4856	0.037479	1.84533	0.998289	-1.4856	-2.9712	1.30767e-05
rs143592467	0.0334524	-1.87498	0.998472	-1.48697	0.0334524	-1.87498	0.998472	-1.48697	-2.97393	1.3041e-05
rs147316711	0.031904	1.88742	0.998543	-1.48712	0.031904	1.88742	0.998543	-1.48712	-2.97424	1.30371e-05
rs114796063	0.0374693	1.84306	0.998289	-1.4899	0.0374693	1.84306	0.998289	-1.4899	-2.9798	1.29647e-05
rs79847227	0.0374662	1.8422	0.998289	-1.49154	0.0374662	1.8422	0.998289	-1.49154	-2.98308	1.29222e-05
rs200869692	0.0846391	-1.60492	0.996144	-1.49616	0.0846391	-1.60492	0.996144	-1.49616	-2.99231	1.28035e-05
rs9898903	0.00561229	2.29674	0.999743	-1.49716	0.00561229	2.29674	0.999743	-1.49716	-2.99431	1.2778e-05
rs141722329	0.04238	1.80244	0.998066	-1.50272	0.04238	1.80244	0.998066	-1.50272	-3.00544	1.26366e-05
rs149726181	0.0123494	2.11502	0.999436	-1.50443	0.0123494	2.11502	0.999436	-1.50443	-3.00886	1.25934e-05
rs115024867	0.0378089	1.82355	0.998274	-1.52113	0.0378089	1.82355	0.998274	-1.52113	-3.04227	1.21797e-05
rs73973274	0.0318997	1.86823	0.998543	-1.52317	0.0318997	1.86823	0.998543	-1.52317	-3.04634	1.21302e-05
rs202179935	0.0796876	1.60627	0.996369	-1.52373	0.0796876	1.60627	0.996369	-1.52373	-3.04747	1.21165e-05
rs149723	0.00590449	2.2699	0.99973	-1.53309	0.00590449	2.2699	0.99973	-1.53309	-3.06617	1.18919e-05
rs12453818	0.00386727	-2.35874	0.999823	-1.53882	0.00386727	-2.35874	0.999823	-1.53882	-3.07764	1.17563e-05
rs117049841	0.0374132	1.81488	0.998292	-1.5421	0.0374132	1.81488	0.998292	-1.5421	-3.0842	1.16795e-05
rs76231923	0.0374299	1.79781	0.998291	-1.57267	0.0374299	1.79781	0.998291	-1.57267	-3.14535	1.09867e-05
rs146829153	0.0373436	1.78916	0.998295	-1.5893	0.0373436	1.78916	0.998295	-1.5893	-3.1786	1.06273e-05
rs35023427	0.00380719	2.3344	0.999826	-1.60375	0.00380719	2.3344	0.999826	-1.60375	-3.20751	1.03246e-05
rs195774	0.00591364	2.23746	0.99973	-1.60542	0.00591364	2.23746	0.99973	-1.60542	-3.21083	1.02903e-05
rs79543302	0.0377074	1.76816	0.998278	-1.62177	0.0377074	1.76816	0.998278	-1.62177	-3.24354	9.95919e-06
rs141845979	0.0671888	-1.58889	0.996937	-1.6357	0.0671888	-1.58889	0.996937	-1.6357	-3.2714	9.68551e-06
rs138993182	0.0185303	1.95025	0.999153	-1.63693	0.0185303	1.95025	0.999153	-1.63693	-3.27387	9.66165e-06
rs117739537	0.032906	-1.79529	0.998497	-1.64116	0.032906	-1.79529	0.998497	-1.64116	-3.28233	9.58025e-06
rs140178174	0.0509911	1.6663	0.997673	-1.64664	0.0509911	1.6663	0.997673	-1.64664	-3.29328	9.4759e-06
rs12951810	0.0221355	1.88743	0.998989	-1.66886	0.0221355	1.88743	0.998989	-1.66886	-3.33773	9.06396e-06
rs113062331	0.0430874	-1.70077	0.998033	-1.67225	0.0430874	-1.70077	0.998033	-1.67225	-3.3445	9.00274e-06
rs201723812	0.0309605	-1.78924	0.998586	-1.68227	0.0309605	-1.78924	0.998586	-1.68227	-3.36453	8.82425e-06
rs199551457	0.014673	1.98622	0.999329	-1.68246	0.014673	1.98622	0.999329	-1.68246	-3.36492	8.82077e-06
rs113709475	0.0274886	1.81352	0.998744	-1.69773	0.0274886	1.81352	0.998744	-1.69773	-3.39545	8.55556e-06
rs147267669	0.055217	-1.60685	0.997481	-1.70424	0.055217	-1.60685	0.997481	-1.70424	-3.40848	8.44479e-06
rs75965800	0.0205326	1.88517	0.999062	-1.71054	0.0205326	1.88517	0.999062	-1.71054	-3.42108	8.3391e-06
rs76687793	0.0521725	1.6178	0.99762	-1.71473	0.0521725	1.6178	0.99762	-1.71473	-3.42947	8.26945e-06
rs144798541	0.0378065	-1.70932	0.998274	-1.7226	0.0378065	-1.70932	0.998274	-1.7226	-3.4452	8.14039e-06
rs76312116	0.0230105	-1.84695	0.998949	-1.72507	0.0230105	-1.84695	0.998949	-1.72507	-3.45014	8.10021e-06
rs145156763	0.0184319	1.90072	0.999158	-1.73488	0.0184319	1.90072	0.999158	-1.73488	-3.46977	7.94279e-06
rs56283539	0.00902504	-2.07537	0.999587	-1.74385	0.00902504	-2.07537	0.999587	-1.74385	-3.4877	7.80165e-06
rs6503110	0.00936258	-2.06598	0.999572	-1.74498	0.00936258	-2.06598	0.999572	-1.74498	-3.48995	7.78407e-06
rs72841487	0.00694736	2.13403	0.999682	-1.75101	0.00694736	2.13403	0.999682	-1.75101	-3.50202	7.69075e-06
rs112322387	0.027341	1.78478	0.998751	-1.75205	0.027341	1.78478	0.998751	-1.75205	-3.5041	7.67476e-06
rs11656361	0.00824996	2.08482	0.999623	-1.76901	0.00824996	2.08482	0.999623	-1.76901	-3.53801	7.41883e-06
rs11649917	0.00776741	-2.09334	0.999645	-1.7813	0.00776741	-2.09334	0.999645	-1.7813	-3.5626	7.23865e-06
rs145556485	0.0153827	-1.9232	0.999297	-1.78202	0.0153827	-1.9232	0.999297	-1.78202	-3.56404	7.22819e-06
rs12943563	0.00356655	2.26838	0.999837	-1.78827	0.00356655	2.26838	0.999837	-1.78827	-3.57655	7.13838e-06
rs188411933	0.0388189	-1.66172	0.998228	-1.78957	0.0388189	-1.66172	0.998228	-1.78957	-3.57915	7.11986e-06
rs112051658	0.0485061	-1.58936	0.997787	-1.79637	0.0485061	-1.58936	0.997787	-1.79637	-3.59275	7.02368e-06
rs199860891	0.0296859	1.72832	0.998644	-1.81016	0.0296859	1.72832	0.998644	-1.81016	-3.62033	6.83261e-06
rs78100215	0.0458213	-1.59367	0.997909	-1.81778	0.0458213	-1.59367	0.997909	-1.81778	-3.63555	6.72935e-06
rs74478547	0.0073338	2.0866	0.999665	-1.82406	0.0073338	2.0866	0.999665	-1.82406	-3.64811	6.64537e-06
rs146457496	0.0284712	1.72772	0.9987	-1.83198	0.0284712	1.72772	0.9987	-1.83198	-3.66397	6.54084e-06
rs72845601	0.0357762	1.65101	0.998367	-1.84784	0.0357762	1.65101	0.998367	-1.84784	-3.69568	6.33669e-06
rs146073791	0.0173973	1.84891	0.999205	-1.86071	0.0173973	1.84891	0.999205	-1.86071	-3.72143	6.17559e-06
rs112356945	0.0398102	-1.60206	0.998183	-1.87422	0.0398102	-1.60206	0.998183	-1.87422	-3.74844	6.01102e-06
rs77640081	0.025846	-1.69568	0.998819	-1.93489	0.025846	-1.69568	0.998819	-1.93489	-3.86979	5.32411e-06
rs4470206	0.0251295	1.68699	0.998852	-1.96357	0.0251295	1.68699	0.998852	-1.96357	-3.92714	5.02734e-06
rs11657574	0.0317396	1.61066	0.998551	-1.97305	0.0317396	1.61066	0.998551	-1.97305	-3.94611	4.9329e-06
rs383123	0.00338341	2.19394	0.999845	-1.98067	0.00338341	2.19394	0.999845	-1.98067	-3.96134	4.85831e-06
rs55770849	0.0111642	-1.88882	0.99949	-2.00733	0.0111642	-1.88882	0.99949	-2.00733	-4.01465	4.60611e-06
rs557964	0.00408768	-2.11918	0.999813	-2.0474	0.00408768	-2.11918	0.999813	-2.0474	-4.0948	4.25134e-06
rs7219148	0.00332728	2.15909	0.999848	-2.06486	0.00332728	2.15909	0.999848	-2.06486	-4.12972	4.10544e-06
rs11654737	0.0244904	-1.62654	0.998881	-2.07644	0.0244904	-1.62654	0.998881	-2.07644	-4.15287	4.01148e-06
rs9891281	0.00940498	-1.89062	0.99957	-2.08949	0.00940498	-1.89062	0.99957	-2.08949	-4.17897	3.90813e-06
rs516434	0.00463708	-2.06893	0.999788	-2.08963	0.00463708	-2.06893	0.999788	-2.08963	-4.17926	3.90702e-06
rs2470233	0.00464082	-2.06397	0.999788	-2.09947	0.00464082	-2.06397	0.999788	-2.09947	-4.19895	3.83085e-06
rs174899	0.0240414	-1.61373	0.998902	-2.10638	0.0240414	-1.61373	0.998902	-2.10638	-4.21276	3.7783e-06
rs1088897	0.00464133	-2.05826	0.999788	-2.11117	0.00464133	-2.05826	0.999788	-2.11117	-4.22235	3.74224e-06
rs442502	0.00426212	2.07792	0.999805	-2.1131	0.00426212	2.07792	0.999805	-2.1131	-4.2262	3.72787e-06
rs1088898	0.00464081	-2.05464	0.999788	-2.11869	0.00464081	-2.05464	0.999788	-2.11869	-4.23738	3.68641e-06
rs111694990	0.00762597	1.92754	0.999651	-2.12368	0.00762597	1.92754	0.999651	-2.12368	-4.24736	3.6498e-06
rs4791758	0.00940848	-1.86818	0.99957	-2.13147	0.00940848	-1.86818	0.99957	-2.13147	-4.26293	3.59342e-06
rs181750997	0.0218351	-1.62559	0.999002	-2.13513	0.0218351	-1.62559	0.999002	-2.13513	-4.27025	3.56719e-06
rs7210598	0.0217731	-1.62173	0.999005	-2.14282	0.0217731	-1.62173	0.999005	-2.14282	-4.28563	3.51275e-06
rs737535	0.0217961	-1.61909	0.999004	-2.14655	0.0217961	-1.61909	0.999004	-2.14655	-4.2931	3.48662e-06
rs2872615	0.00454151	-2.04601	0.999792	-2.14718	0.00454151	-2.04601	0.999792	-2.14718	-4.29435	3.48225e-06
rs8064777	0.00436136	2.05528	0.999801	-2.14838	0.00436136	2.05528	0.999801	-2.14838	-4.29677	3.47386e-06
rs7216653	0.00367721	2.09453	0.999832	-2.1522	0.00367721	2.09453	0.999832	-2.1522	-4.30441	3.44742e-06
rs200107737	0.0176287	1.6797	0.999194	-2.15242	0.0176287	1.6797	0.999194	-2.15242	-4.30485	3.44591e-06
rs60736442	0.0217958	-1.61419	0.999004	-2.15447	0.0217958	-1.61419	0.999004	-2.15447	-4.30894	3.43183e-06
rs7212166	0.00366763	2.08685	0.999832	-2.16954	0.00366763	2.08685	0.999832	-2.16954	-4.33908	3.32994e-06
rs11078773	0.00333437	2.09791	0.999848	-2.19399	0.00333437	2.09791	0.999848	-2.19399	-4.38798	3.17101e-06
rs7209733	0.0219031	-1.58476	0.998999	-2.19906	0.0219031	-1.58476	0.998999	-2.19906	-4.39813	3.139e-06
rs74380825	0.0219404	-1.57868	0.998998	-2.20781	0.0219404	-1.57868	0.998998	-2.20781	-4.41563	3.08455e-06
rs12936782	0.00338218	2.08013	0.999845	-2.22403	0.00338218	2.08013	0.999845	-2.22403	-4.44806	2.98612e-06
rs77346442	0.0112383	-1.76844	0.999486	-2.22405	0.0112383	-1.76844	0.999486	-2.22405	-4.4481	2.98599e-06
rs11078729	0.00361515	2.06305	0.999835	-2.22613	0.00361515	2.06305	0.999835	-2.22613	-4.45226	2.97359e-06
rs9904305	0.00918692	-1.82	0.99958	-2.23216	0.00918692	-1.82	0.99958	-2.23216	-4.46433	2.93794e-06
rs11650357	0.00424284	-2.02038	0.999806	-2.23324	0.00424284	-2.02038	0.999806	-2.23324	-4.46649	2.93159e-06
rs940850	0.0087759	1.81528	0.999599	-2.26358	0.0087759	1.81528	0.999599	-2.26358	-4.52717	2.759e-06
rs78473190	0.0114276	1.73229	0.999478	-2.27896	0.0114276	1.73229	0.999478	-2.27896	-4.55791	2.67546e-06
rs9910865	0.00836746	1.80424	0.999617	-2.30734	0.00836746	1.80424	0.999617	-2.30734	-4.61467	2.52782e-06
rs11658992	0.0149343	1.63441	0.999317	-2.31012	0.0149343	1.63441	0.999317	-2.31012	-4.62023	2.51382e-06
rs181542	0.00328095	-2.04019	0.99985	-2.32149	0.00328095	-2.04019	0.99985	-2.32149	-4.64298	2.45729e-06
rs7220238	0.0151859	-1.61984	0.999306	-2.32547	0.0151859	-1.61984	0.999306	-2.32547	-4.65095	2.43778e-06
rs72841497	0.00362571	2.00613	0.999834	-2.34045	0.00362571	2.00613	0.999834	-2.34045	-4.68091	2.36582e-06
rs62069324	0.00425798	-1.95367	0.999805	-2.36401	0.00425798	-1.95367	0.999805	-2.36401	-4.72802	2.25695e-06
rs112279586	0.00849138	1.76319	0.999612	-2.37319	0.00849138	1.76319	0.999612	-2.37319	-4.74638	2.21588e-06
rs181543	0.0032817	-2.01269	0.99985	-2.37709	0.0032817	-2.01269	0.99985	-2.37709	-4.75418	2.19868e-06
rs10153262	0.00434061	1.93967	0.999802	-2.38165	0.00434061	1.93967	0.999802	-2.38165	-4.76329	2.17873e-06
rs6145983	0.00344508	1.99197	0.999842	-2.3943	0.00344508	1.99197	0.999842	-2.3943	-4.7886	2.12428e-06
rs10852910	0.00422227	-1.93916	0.999807	-2.39644	0.00422227	-1.93916	0.999807	-2.39644	-4.79288	2.11522e-06
rs2242374	0.00915843	1.72787	0.999581	-2.39707	0.00915843	1.72787	0.999581	-2.39707	-4.79414	2.11255e-06
rs62069283	0.00337519	1.99453	0.999846	-2.39943	0.00337519	1.99453	0.999846	-2.39943	-4.79886	2.1026e-06
rs150172311	0.00955536	-1.71196	0.999563	-2.40324	0.00955536	-1.71196	0.999563	-2.40324	-4.80649	2.08662e-06
rs2072089	0.00446283	1.92002	0.999796	-2.40569	0.00446283	1.92002	0.999796	-2.40569	-4.81138	2.07645e-06
rs74653914	0.0113518	1.65544	0.999481	-2.41238	0.0113518	1.65544	0.999481	-2.41238	-4.82477	2.04883e-06
rs74252684	0.00565527	1.85084	0.999741	-2.41782	0.00565527	1.85084	0.999741	-2.41782	-4.83564	2.02668e-06
rs34363073	0.00467621	1.90059	0.999786	-2.41946	0.00467621	1.90059	0.999786	-2.41946	-4.83893	2.02001e-06
rs11078775	0.003878	1.94553	0.999823	-2.42657	0.003878	1.94553	0.999823	-2.42657	-4.85314	1.99151e-06
rs56249806	0.00494026	1.87801	0.999774	-2.43468	0.00494026	1.87801	0.999774	-2.43468	-4.86936	1.95948e-06
rs17734945	0.0111759	1.64471	0.999489	-2.43788	0.0111759	1.64471	0.999489	-2.43788	-4.87576	1.94697e-06
rs112762518	0.00434807	1.88476	0.999801	-2.48577	0.00434807	1.88476	0.999801	-2.48577	-4.97154	1.76915e-06
rs7218411	0.00613614	1.7894	0.999719	-2.48886	0.00613614	1.7894	0.999719	-2.48886	-4.97772	1.75824e-06
rs144518170	0.0044435	1.87247	0.999797	-2.49801	0.0044435	1.87247	0.999797	-2.49801	-4.99603	1.72635e-06
rs7218002	0.0032761	1.94959	0.99985	-2.50293	0.0032761	1.94959	0.99985	-2.50293	-5.00586	1.70945e-06
rs75634528	0.0116428	1.58697	0.999468	-2.5107	0.0116428	1.58697	0.999468	-2.5107	-5.02141	1.68309e-06
rs192991343	0.00944798	-1.63956	0.999568	-2.53017	0.00944798	-1.63956	0.999568	-2.53017	-5.06034	1.61882e-06
rs112818801	0.00435736	1.85904	0.999801	-2.53284	0.00435736	1.85904	0.999801	-2.53284	-5.06567	1.61021e-06
rs3027188	0.0073964	-1.71081	0.999662	-2.53307	0.0073964	-1.71081	0.999662	-2.53307	-5.06614	1.60945e-06
rs34039315	0.00611909	1.7632	0.99972	-2.53677	0.00611909	1.7632	0.99972	-2.53677	-5.07354	1.59759e-06
rs4791760	0.00361853	1.90337	0.999835	-2.54228	0.00361853	1.90337	0.999835	-2.54228	-5.08455	1.58009e-06
rs112064536	0.00967219	-1.62398	0.999558	-2.54387	0.00967219	-1.62398	0.999558	-2.54387	-5.08773	1.57507e-06
rs7503044	0.0102787	-1.59727	0.99953	-2.5565	0.0102787	-1.59727	0.99953	-2.5565	-5.113	1.53577e-06
rs753819016	0.00624595	1.74003	0.999714	-2.5671	0.00624595	1.74003	0.999714	-2.5671	-5.1342	1.50356e-06
rs11078733	0.00478629	1.81436	0.999781	-2.56798	0.00478629	1.81436	0.999781	-2.56798	-5.13597	1.5009e-06
rs16957648	0.00445001	1.83172	0.999797	-2.57274	0.00445001	1.83172	0.999797	-2.57274	-5.14548	1.48669e-06
rs7223367	0.00466485	-1.81698	0.999787	-2.57607	0.00466485	-1.81698	0.999787	-2.57607	-5.15215	1.47681e-06
rs1880646	0.00413935	-1.84823	0.999811	-2.57852	0.00413935	-1.84823	0.999811	-2.57852	-5.15704	1.46961e-06
rs62063062	0.00960355	-1.60246	0.999561	-2.58213	0.00960355	-1.60246	0.999561	-2.58213	-5.16426	1.45903e-06
rs1348325	0.00964693	-1.59846	0.999559	-2.58627	0.00964693	-1.59846	0.999559	-2.58627	-5.17254	1.447e-06
rs371012563	0.0097685	-1.59183	0.999553	-2.59059	0.0097685	-1.59183	0.999553	-2.59059	-5.18117	1.43456e-06
rs142202065	0.00932397	-1.60266	0.999574	-2.59655	0.00932397	-1.60266	0.999574	-2.59655	-5.1931	1.41755e-06
rs3027229	0.00956856	-1.59427	0.999563	-2.59703	0.00956856	-1.59427	0.999563	-2.59703	-5.19406	1.4162e-06
rs556914	0.00340307	1.88961	0.999844	-2.59905	0.00340307	1.88961	0.999844	-2.59905	-5.19809	1.41049e-06
rs62063063	0.0096077	-1.59087	0.999561	-2.60041	0.0096077	-1.59087	0.999561	-2.60041	-5.20082	1.40665e-06
rs62063065	0.00961712	-1.5897	0.99956	-2.60177	0.00961712	-1.5897	0.99956	-2.60177	-5.20355	1.40282e-06
rs57954537	0.00959273	-1.58969	0.999561	-2.60306	0.00959273	-1.58969	0.999561	-2.60306	-5.20612	1.39921e-06
rs59377385	0.00984921	-1.58116	0.99955	-2.60341	0.00984921	-1.58116	0.99955	-2.60341	-5.20682	1.39824e-06
rs8081052	0.0084148	1.62946	0.999615	-2.60448	0.0084148	1.62946	0.999615	-2.60448	-5.20896	1.39524e-06
rs34526446	0.00604309	-1.72763	0.999724	-2.60509	0.00604309	-1.72763	0.999724	-2.60509	-5.21018	1.39354e-06
rs72811919	0.00932524	-1.59501	0.999574	-2.60871	0.00932524	-1.59501	0.999574	-2.60871	-5.21741	1.38351e-06
rs72811909	0.00926029	-1.59448	0.999577	-2.61305	0.00926029	-1.59448	0.999577	-2.61305	-5.2261	1.37153e-06
rs62063064	0.00961816	-1.58107	0.99956	-2.6154	0.00961816	-1.58107	0.99956	-2.6154	-5.2308	1.36511e-06
rs56066045	0.00970481	-1.57667	0.999556	-2.61787	0.00970481	-1.57667	0.999556	-2.61787	-5.23574	1.35838e-06
rs72811916	0.0093088	-1.58498	0.999574	-2.62554	0.0093088	-1.58498	0.999574	-2.62554	-5.25107	1.33771e-06
rs72809912	0.00488876	1.77386	0.999776	-2.63004	0.00488876	1.77386	0.999776	-2.63004	-5.26009	1.32571e-06
rs7223668	0.00327432	-1.88002	0.99985	-2.63639	0.00327432	-1.88002	0.99985	-2.63639	-5.27278	1.30899e-06
rs8079866	0.00332894	1.87325	0.999848	-2.64083	0.00332894	1.87325	0.999848	-2.64083	-5.28165	1.29743e-06
rs4791761	0.00444109	1.79034	0.999797	-2.64866	0.00444109	1.79034	0.999797	-2.64866	-5.29732	1.27725e-06
rs56090004	0.00540366	-1.73316	0.999753	-2.65138	0.00540366	-1.73316	0.999753	-2.65138	-5.30276	1.27033e-06
rs60105196	0.00537849	-1.73408	0.999754	-2.65212	0.00537849	-1.73408	0.999754	-2.65212	-5.30425	1.26844e-06
rs58956766	0.00537619	-1.73353	0.999754	-2.65328	0.00537619	-1.73353	0.999754	-2.65328	-5.30656	1.26551e-06
rs62065098	0.00538589	-1.73216	0.999754	-2.65475	0.00538589	-1.73216	0.999754	-2.65475	-5.30951	1.26179e-06
rs940854	0.00327254	-1.86942	0.99985	-2.65654	0.00327254	-1.86942	0.99985	-2.65654	-5.31308	1.25728e-06
rs7208515	0.0032736	-1.86882	0.99985	-2.6575	0.0032736	-1.86882	0.99985	-2.6575	-5.315	1.25487e-06
rs8077402	0.00492818	-1.75019	0.999775	-2.66774	0.00492818	-1.75019	0.999775	-2.66774	-5.33548	1.22944e-06
rs12944725	0.00605592	1.6887	0.999723	-2.67051	0.00605592	1.6887	0.999723	-2.67051	-5.34103	1.22263e-06
rs8067701	0.00327647	-1.85977	0.99985	-2.67393	0.00327647	-1.85977	0.99985	-2.67393	-5.34786	1.21431e-06
rs8068863	0.00327653	-1.85933	0.99985	-2.67473	0.00327653	-1.85933	0.99985	-2.67473	-5.34946	1.21237e-06
rs12953027	0.00604848	1.68505	0.999723	-2.67727	0.00604848	1.68505	0.999723	-2.67727	-5.35454	1.20622e-06
rs12942591	0.00604884	1.68391	0.999723	-2.67916	0.00604884	1.68391	0.999723	-2.67916	-5.35833	1.20166e-06
rs8069226	0.00327597	-1.85383	0.99985	-2.68503	0.00327597	-1.85383	0.99985	-2.68503	-5.37006	1.18765e-06
rs9894560	0.00327583	-1.8521	0.99985	-2.68825	0.00327583	-1.8521	0.99985	-2.68825	-5.37649	1.18003e-06
rs2289591	0.00434191	-1.77376	0.999801	-2.68948	0.00434191	-1.77376	0.999801	-2.68948	-5.37896	1.17712e-06
rs34012075	0.00371613	1.81601	0.99983	-2.69143	0.00371613	1.81601	0.99983	-2.69143	-5.38285	1.17255e-06
rs12150163	0.00605444	1.67261	0.999723	-2.69767	0.00605444	1.67261	0.999723	-2.69767	-5.39534	1.158e-06
rs35820066	0.0060529	1.67182	0.999723	-2.69912	0.0060529	1.67182	0.999723	-2.69912	-5.39823	1.15465e-06
rs8078371	0.00496141	-1.70867	0.999773	-2.73617	0.00496141	-1.70867	0.999773	-2.73617	-5.47234	1.07218e-06
rs4534913	0.00542475	-1.67931	0.999752	-2.74129	0.00542475	-1.67931	0.999752	-2.74129	-5.48259	1.06125e-06
rs57983433	0.00559073	-1.66877	0.999744	-2.74388	0.00559073	-1.66877	0.999744	-2.74388	-5.48775	1.05578e-06
rs12150147	0.00605449	1.64434	0.999723	-2.74453	0.00605449	1.64434	0.999723	-2.74453	-5.48907	1.0544e-06
rs34865317	0.00479025	-1.71289	0.999781	-2.74649	0.00479025	-1.71289	0.999781	-2.74649	-5.49297	1.05029e-06
rs71371889	0.00478987	-1.71183	0.999781	-2.74834	0.00478987	-1.71183	0.999781	-2.74834	-5.49668	1.0464e-06
rs62067498	0.0063293	-1.62706	0.999711	-2.75061	0.0063293	-1.62706	0.999711	-2.75061	-5.50123	1.04165e-06
rs12951242	0.004792	-1.70892	0.999781	-2.75309	0.004792	-1.70892	0.999781	-2.75309	-5.50618	1.0365e-06
rs2040556	0.00363942	-1.78346	0.999834	-2.76041	0.00363942	-1.78346	0.999834	-2.76041	-5.52082	1.02144e-06
rs4791742	0.00460076	-1.71567	0.99979	-2.76189	0.00460076	-1.71567	0.99979	-2.76189	-5.52378	1.01843e-06
rs57194775	0.00610069	1.62948	0.999721	-2.76504	0.00610069	1.62948	0.999721	-2.76504	-5.53009	1.01202e-06
rs57869918	0.0055992	-1.63816	0.999744	-2.79372	0.0055992	-1.63816	0.999744	-2.79372	-5.58744	9.55611e-07
rs76997743	0.00527086	-1.65396	0.999759	-2.7979	0.00527086	-1.65396	0.999759	-2.7979	-5.5958	9.47656e-07
rs904170	0.00492345	-1.6737	0.999775	-2.79913	0.00492345	-1.6737	0.999775	-2.79913	-5.59827	9.4532e-07
rs4531797	0.00542503	-1.63928	0.999752	-2.80767	0.00542503	-1.63928	0.999752	-2.80767	-5.61534	9.2932e-07
rs4458042	0.00461684	-1.68697	0.999789	-2.80896	0.00461684	-1.68697	0.999789	-2.80896	-5.61793	9.26914e-07
rs56408410	0.00391872	-1.73306	0.999821	-2.81207	0.00391872	-1.73306	0.999821	-2.81207	-5.62415	9.21167e-07
rs11655960	0.00424319	1.70739	0.999806	-2.81648	0.00424319	1.70739	0.999806	-2.81648	-5.63296	9.13089e-07
rs4445935	0.00461609	-1.6819	0.999789	-2.81759	0.00461609	-1.6819	0.999789	-2.81759	-5.63518	9.11061e-07
rs7225030	0.0046148	-1.67994	0.999789	-2.82102	0.0046148	-1.67994	0.999789	-2.82102	-5.64204	9.04831e-07
rs4275897	0.00461413	-1.67658	0.999789	-2.82672	0.00461413	-1.67658	0.999789	-2.82672	-5.65344	8.94578e-07
rs2101939	0.00461393	-1.6763	0.999789	-2.82722	0.00461393	-1.6763	0.999789	-2.82722	-5.65444	8.93679e-07
rs3027232	0.00475915	1.66648	0.999782	-2.82814	0.00475915	1.66648	0.999782	-2.82814	-5.65628	8.9204e-07
rs6503149	0.00461352	-1.67525	0.999789	-2.82902	0.00461352	-1.67525	0.999789	-2.82902	-5.65803	8.90477e-07
rs181540	0.00327993	-1.77022	0.99985	-2.8359	0.00327993	-1.77022	0.99985	-2.8359	-5.67179	8.78307e-07
rs4413002	0.00461302	-1.67065	0.999789	-2.83677	0.00461302	-1.67065	0.999789	-2.83677	-5.67355	8.76767e-07
rs7225052	0.00461481	-1.66782	0.999789	-2.8413	0.00461481	-1.66782	0.999789	-2.8413	-5.6826	8.6887e-07
rs613229	0.00367628	-1.73152	0.999832	-2.84665	0.00367628	-1.73152	0.999832	-2.84665	-5.6933	8.59616e-07
rs7219393	0.00461223	-1.66359	0.999789	-2.84862	0.00461223	-1.66359	0.999789	-2.84862	-5.69724	8.56234e-07
rs2055232	0.00460744	-1.66373	0.999789	-2.8489	0.00460744	-1.66373	0.999789	-2.8489	-5.69781	8.55753e-07
rs7208014	0.0046129	-1.66328	0.999789	-2.84907	0.0046129	-1.66328	0.999789	-2.84907	-5.69814	8.55471e-07
rs143660074	0.00490378	1.64207	0.999776	-2.85357	0.00490378	1.64207	0.999776	-2.85357	-5.70713	8.47812e-07
rs34336857	0.00460586	-1.66036	0.999789	-2.85467	0.00460586	-1.66036	0.999789	-2.85467	-5.70935	8.45933e-07
rs1579523	0.00554992	-1.59817	0.999746	-2.86283	0.00554992	-1.59817	0.999746	-2.86283	-5.72567	8.3224e-07
rs1975108	0.00460444	-1.6549	0.999789	-2.86388	0.00460444	-1.6549	0.999789	-2.86388	-5.72776	8.30502e-07
rs9892383	0.00475515	1.64066	0.999783	-2.87125	0.00475515	1.64066	0.999783	-2.87125	-5.7425	8.1835e-07
rs62067502	0.00460704	-1.64907	0.999789	-2.87323	0.00460704	-1.64907	0.999789	-2.87323	-5.74645	8.15119e-07
rs72809924	0.00432355	-1.66489	0.999802	-2.87874	0.00432355	-1.66489	0.999802	-2.87874	-5.75748	8.06178e-07
rs7210614	0.00369163	1.70946	0.999831	-2.88251	0.00369163	1.70946	0.999831	-2.88251	-5.76502	8.00129e-07
rs11290458	0.00460708	-1.62888	0.999789	-2.90631	0.00460708	-1.62888	0.999789	-2.90631	-5.81262	7.62934e-07
rs35244730	0.00393203	1.67601	0.99982	-2.9076	0.00393203	1.67601	0.99982	-2.9076	-5.8152	7.6097e-07
rs5819205	0.00485214	-1.61183	0.999778	-2.90803	0.00485214	-1.61183	0.999778	-2.90803	-5.81606	7.60311e-07
rs6503152	0.00485608	-1.61029	0.999778	-2.91011	0.00485608	-1.61029	0.999778	-2.91011	-5.82022	7.57153e-07
rs59547092	0.00416398	1.64458	0.99981	-2.93114	0.00416398	1.64458	0.99981	-2.93114	-5.86228	7.25971e-07
rs11078728	0.00362542	1.68232	0.999834	-2.93758	0.00362542	1.68232	0.999834	-2.93758	-5.87515	7.16684e-07
rs10676135	0.0046726	-1.60496	0.999786	-2.93793	0.0046726	-1.60496	0.999786	-2.93793	-5.87586	7.16181e-07
rs4338847	0.00357373	-1.67792	0.999837	-2.95215	0.00357373	-1.67792	0.999837	-2.95215	-5.9043	6.96096e-07
rs7210747	0.00484477	-1.58055	0.999778	-2.95872	0.00484477	-1.58055	0.999778	-2.95872	-5.91744	6.87012e-07
rs4791748	0.0048587	-1.57428	0.999778	-2.96717	0.0048587	-1.57428	0.999778	-2.96717	-5.93435	6.75493e-07
rs60415448	0.00391537	1.63737	0.999821	-2.97373	0.00391537	1.63737	0.999821	-2.97373	-5.94746	6.66693e-07
rs4539642	0.00417382	1.6138	0.999809	-2.98009	0.00417382	1.6138	0.999809	-2.98009	-5.96018	6.58264e-07
rs11078779	0.00412791	-1.61709	0.999811	-2.98031	0.00412791	-1.61709	0.999811	-2.98031	-5.96063	6.57972e-07
rs4792805	0.00431569	-1.5993	0.999803	-2.98669	0.00431569	-1.5993	0.999803	-2.98669	-5.97339	6.49629e-07
rs57230550	0.00455568	1.57918	0.999792	-2.99162	0.00455568	1.57918	0.999792	-2.99162	-5.98323	6.43263e-07
rs11868829	0.00368587	1.64446	0.999831	-2.99227	0.00368587	1.64446	0.999831	-2.99227	-5.98455	6.4242e-07
rs4791747	0.0045399	-1.57691	0.999792	-2.99694	0.0045399	-1.57691	0.999792	-2.99694	-5.99388	6.36453e-07
rs4600516	0.00370902	1.63229	0.99983	-3.00909	0.00370902	1.63229	0.99983	-3.00909	-6.01819	6.21168e-07
rs57467802	0.00392332	1.61462	0.999821	-3.0097	0.00392332	1.61462	0.999821	-3.0097	-6.0194	6.20414e-07
rs11078774	0.00375218	1.62016	0.999828	-3.02302	0.00375218	1.62016	0.999828	-3.02302	-6.04604	6.04104e-07
rs7215436	0.00346262	-1.63467	0.999842	-3.03956	0.00346262	-1.63467	0.999842	-3.03956	-6.07911	5.84452e-07
rs12103521	0.00374786	1.60385	0.999829	-3.0499	0.00374786	1.60385	0.999829	-3.0499	-6.09979	5.72491e-07
rs12942861	0.00363169	1.60425	0.999834	-3.06498	0.00363169	1.60425	0.999834	-3.06498	-6.12996	5.55476e-07

## Sheet: ACTN1
snp	V.df1	z.df1	r.df1	lABF.df1	V.df2	z.df2	r.df2	lABF.df2	internal.sum.lABF	SNP.PP.H4
rs149387921	0.159	-3.67152	0.992626	4.23544	0.159	-3.67152	0.992626	4.23544	8.47087	0.583227
rs140473492	0.158307	-3.46958	0.992658	3.51776	0.158307	-3.46958	0.992658	3.51776	7.03551	0.138825
rs568764407	0.161479	-3.45554	0.992512	3.47849	0.161479	-3.45554	0.992512	3.47849	6.95697	0.128339
rs145881542	0.16406	-3.41986	0.992393	3.3639	0.16406	-3.41986	0.992393	3.3639	6.7278	0.102054
rs145517654	0.172052	-3.12847	0.992025	2.43889	0.172052	-3.12847	0.992025	2.43889	4.87778	0.0160464
rs183606112	0.155506	2.8884	0.992787	1.67543	0.155506	2.8884	0.992787	1.67543	3.35086	0.00348532
rs3784133	0.141539	-2.89915	0.99343	1.66229	0.141539	-2.89915	0.99343	1.66229	3.32459	0.00339494
rs541476594	0.167362	-2.80546	0.992241	1.47532	0.167362	-2.80546	0.992241	1.47532	2.95064	0.00233576
rs150333373	0.0697662	2.87522	0.996751	1.25534	0.0697662	2.87522	0.996751	1.25534	2.51068	0.00150438
rs36062645	0.0649098	2.84498	0.996976	1.13406	0.0649098	2.84498	0.996976	1.13406	2.26813	0.00118037
rs12891647	0.0651766	2.83964	0.996964	1.12094	0.0651766	2.83964	0.996964	1.12094	2.24188	0.0011498
rs141854367	0.0653344	2.83755	0.996957	1.1162	0.0653344	2.83755	0.996957	1.1162	2.2324	0.00113895
rs35586847	0.0672764	2.83081	0.996866	1.11139	0.0672764	2.83081	0.996866	1.11139	2.22279	0.00112805
rs12880577	0.0650316	2.82485	0.996971	1.0781	0.0650316	2.82485	0.996971	1.0781	2.1562	0.00105538
rs3784116	0.00436728	3.26021	0.999796	1.06473	0.00436728	3.26021	0.999796	1.06473	2.12945	0.00102752
rs778561091	0.167099	-2.64504	0.992253	1.04078	0.167099	-2.64504	0.992253	1.04078	2.08157	0.000979481
rs34867305	0.0670629	2.77361	0.996876	0.950054	0.0670629	2.77361	0.996876	0.950054	1.90011	0.000816938
rs147516752	16.7044	2.09648	0.561643	0.821915	16.7044	2.09648	0.561643	0.821915	1.64383	0.000632251
rs769168632	8.48295	1.93914	0.71615	0.716801	8.48295	1.93914	0.71615	0.716801	1.4336	0.000512376
rs533304757	0.143425	-2.52962	0.993343	0.672121	0.143425	-2.52962	0.993343	0.672121	1.34424	0.000468576
rs544954167	0.143425	-2.52962	0.993343	0.672121	0.143425	-2.52962	0.993343	0.672121	1.34424	0.000468576
rs193051508	0.155394	2.47552	0.992792	0.575741	0.155394	2.47552	0.992792	0.575741	1.15148	0.000386426
rs184075602	0.131712	-2.49549	0.993884	0.546303	0.131712	-2.49549	0.993884	0.546303	1.09261	0.000364331
rs117048556	0.0754793	-2.59378	0.996486	0.526555	0.0754793	-2.59378	0.996486	0.526555	1.05311	0.000350222
rs568054137	11.6021	1.75867	0.64847	0.480101	11.6021	1.75867	0.64847	0.480101	0.960201	0.000319149
rs34422043	0.0123792	2.90167	0.999422	0.479513	0.0123792	2.90167	0.999422	0.479513	0.959026	0.000318774
rs528668310	17.2305	1.73573	0.553994	0.430813	17.2305	1.73573	0.553994	0.430813	0.861625	0.000289189
rs147913628	0.139575	2.42551	0.993521	0.402922	0.139575	2.42551	0.993521	0.402922	0.805845	0.0002735
rs34165654	0.0672806	2.56147	0.996866	0.387513	0.0672806	2.56147	0.996866	0.387513	0.775025	0.000265199
rs549596742	0.12024	2.43901	0.994413	0.364093	0.12024	2.43901	0.994413	0.364093	0.728186	0.000253064
rs549221720	0.0212148	2.75466	0.99901	0.331535	0.0212148	2.75466	0.99901	0.331535	0.663069	0.00023711
rs72727486	0.0401634	-2.63658	0.998127	0.329182	0.0401634	-2.63658	0.998127	0.329182	0.658363	0.000235997
rs552141208	0.142713	-2.38272	0.993376	0.311343	0.142713	-2.38272	0.993376	0.311343	0.622686	0.000227726
rs187233351	0.108823	2.43262	0.994941	0.300555	0.108823	2.43262	0.994941	0.300555	0.601109	0.000222865
rs151099651	0.0831036	-2.47045	0.996132	0.262228	0.0831036	-2.47045	0.996132	0.262228	0.524456	0.00020642
rs12895271	0.118778	2.397	0.994481	0.257189	0.118778	2.397	0.994481	0.257189	0.514379	0.00020435
rs140497071	0.137319	-2.36333	0.993625	0.247177	0.137319	-2.36333	0.993625	0.247177	0.494354	0.000200299
rs11557769	0.0613721	2.51988	0.997141	0.237227	0.0613721	2.51988	0.997141	0.237227	0.474454	0.000196352
rs201347041	0.0127977	2.79747	0.999402	0.199277	0.0127977	2.79747	0.999402	0.199277	0.398554	0.000182001
rs190413594	0.176711	2.27182	0.991811	0.156957	0.176711	2.27182	0.991811	0.156957	0.313915	0.00016723
rs201467372	87.0989	1.63404	0.197255	0.153486	87.0989	1.63404	0.197255	0.153486	0.306971	0.000166073
rs8008198	0.148249	2.30148	0.993121	0.140563	0.148249	2.30148	0.993121	0.140563	0.281127	0.000161836
rs528881301	239.5	2.09113	0.0820321	0.136559	239.5	2.09113	0.0820321	0.136559	0.273119	0.000160545
rs146736254	0.0848534	-2.41365	0.996051	0.1342	0.0848534	-2.41365	0.996051	0.1342	0.268401	0.000159789
rs17105794	0.0174261	-2.71649	0.999186	0.129618	0.0174261	-2.71649	0.999186	0.129618	0.259237	0.000158332
rs71423332	0.115819	2.34291	0.994618	0.11753	0.115819	2.34291	0.994618	0.11753	0.235059	0.00015455
rs117494433	0.0998971	2.36829	0.995354	0.105486	0.0998971	2.36829	0.995354	0.105486	0.210972	0.000150871
rs562792371	3614.84	1.74421	0.00588586	0.00600156	3614.84	1.74421	0.00588586	0.00600156	0.0120031	0.000123651
rs10142141	0.0130293	-2.71973	0.999392	-0.00612424	0.0130293	-2.71973	0.999392	-0.00612424	-0.0122485	0.000120688
rs10220562	0.0131304	-2.70659	0.999387	-0.0378949	0.0131304	-2.70659	0.999387	-0.0378949	-0.0757899	0.000113258
rs12434957	0.0130471	-2.70712	0.999391	-0.0396347	0.0130471	-2.70712	0.999391	-0.0396347	-0.0792694	0.000112864
rs10149281	0.0130627	-2.70641	0.99939	-0.0409617	0.0130627	-2.70641	0.99939	-0.0409617	-0.0819234	0.000112565
rs8017601	0.0225949	-2.60041	0.998945	-0.049798	0.0225949	-2.60041	0.998945	-0.049798	-0.099596	0.000110593
rs73288945	0.0130686	-2.68728	0.99939	-0.0923054	0.0130686	-2.68728	0.99939	-0.0923054	-0.184611	0.00010158
rs113621580	0.0130686	-2.68723	0.99939	-0.0924229	0.0130686	-2.68723	0.99939	-0.0924229	-0.184846	0.000101556
rs74059828	0.0130697	-2.6869	0.99939	-0.0932822	0.0130697	-2.6869	0.99939	-0.0932822	-0.186564	0.000101382
rs35108730	0.102666	2.27472	0.995226	-0.0974538	0.102666	2.27472	0.995226	-0.0974538	-0.194908	0.000100539
rs10136833	0.0130707	-2.68486	0.99939	-0.098712	0.0130707	-2.68486	0.99939	-0.098712	-0.197424	0.000100287
rs10136928	0.0130716	-2.6845	0.99939	-0.0996332	0.0130716	-2.6845	0.99939	-0.0996332	-0.199266	0.000100102
rs10147838	0.0130711	-2.68434	0.99939	-0.100088	0.0130711	-2.68434	0.99939	-0.100088	-0.200176	0.000100011
rs76041256	0.0130798	-2.68	0.999389	-0.111406	0.0130798	-2.68	0.999389	-0.111406	-0.222812	9.77726e-05
rs10220358	0.0131235	-2.67294	0.999387	-0.128609	0.0131235	-2.67294	0.999387	-0.128609	-0.257218	9.44659e-05
rs10220357	0.0131859	-2.66725	0.999384	-0.141448	0.0131859	-2.66725	0.999384	-0.141448	-0.282896	9.2071e-05
rs12897073	0.101661	2.25019	0.995272	-0.157476	0.101661	2.25019	0.995272	-0.157476	-0.314952	8.91664e-05
rs10147437	0.0130608	-2.65829	0.99939	-0.170027	0.0130608	-2.65829	0.99939	-0.170027	-0.340055	8.69559e-05
rs10139706	0.0129586	-2.65591	0.999395	-0.18026	0.0129586	-2.65591	0.999395	-0.18026	-0.360519	8.51945e-05
rs143760466	0.111395	-2.21765	0.994822	-0.185434	0.111395	-2.21765	0.994822	-0.185434	-0.370868	8.43174e-05
rs75493960	0.0215508	-2.55083	0.998994	-0.20083	0.0215508	-2.55083	0.998994	-0.20083	-0.40166	8.17607e-05
rs17105762	0.0176122	-2.56985	0.999178	-0.252402	0.0176122	-2.56985	0.999178	-0.252402	-0.504803	7.37479e-05
rs560997998	0.143192	2.07741	0.993354	-0.363403	0.143192	2.07741	0.993354	-0.363403	-0.726806	5.90657e-05
rs139435306	0.0299287	2.40307	0.998604	-0.403589	0.0299287	2.40307	0.998604	-0.403589	-0.807177	5.45043e-05
rs371440985	0.540844	1.70228	0.975353	-0.43838	0.540844	1.70228	0.975353	-0.43838	-0.876759	5.08407e-05
rs3837662	0.0135511	-2.54579	0.999367	-0.444237	0.0135511	-2.54579	0.999367	-0.444237	-0.888475	5.02485e-05
rs118179065	0.0977944	2.12387	0.995451	-0.451313	0.0977944	2.12387	0.995451	-0.451313	-0.902626	4.95425e-05
rs148069807	0.153919	2.00851	0.99286	-0.468354	0.153919	2.00851	0.99286	-0.468354	-0.936707	4.78824e-05
rs560259128	0.236831	1.90012	0.989055	-0.471984	0.236831	1.90012	0.989055	-0.471984	-0.943967	4.75361e-05
rs543905653	0.171653	1.97268	0.992044	-0.486644	0.171653	1.97268	0.992044	-0.486644	-0.973288	4.61625e-05
rs189963349	0.0914754	2.08504	0.995744	-0.56529	0.0914754	2.08504	0.995744	-0.56529	-1.13058	3.94438e-05
rs116293187	0.174457	1.92405	0.991915	-0.572837	0.174457	1.92405	0.991915	-0.572837	-1.14567	3.88529e-05
rs181595697	0.119937	2.00779	0.994427	-0.590561	0.119937	2.00779	0.994427	-0.590561	-1.18112	3.74997e-05
rs144703783	0.0474747	2.20227	0.997787	-0.636998	0.0474747	2.20227	0.997787	-0.636998	-1.274	3.41738e-05
rs192804948	0.0900294	2.04677	0.995811	-0.651809	0.0900294	2.04677	0.995811	-0.651809	-1.30362	3.31764e-05
rs142966079	0.193466	1.85222	0.991042	-0.657585	0.193466	1.85222	0.991042	-0.657585	-1.31517	3.27953e-05
rs138673136	0.0938546	2.01356	0.995634	-0.698584	0.0938546	2.01356	0.995634	-0.698584	-1.39717	3.02135e-05
rs139556226	0.120266	1.94585	0.994412	-0.710996	0.120266	1.94585	0.994412	-0.710996	-1.42199	2.94727e-05
rs184382393	0.201221	-1.8056	0.990686	-0.723187	0.201221	-1.8056	0.990686	-0.723187	-1.44637	2.87628e-05
rs143271056	0.0998238	1.97416	0.995358	-0.746638	0.0998238	1.97416	0.995358	-0.746638	-1.49328	2.74449e-05
rs78003584	0.123886	-1.91027	0.994245	-0.764761	0.123886	-1.91027	0.994245	-0.764761	-1.52952	2.64679e-05
rs147937305	0.15132	1.85613	0.992979	-0.768945	0.15132	1.85613	0.992979	-0.768945	-1.53789	2.62474e-05
rs139138110	0.118264	-1.91173	0.994505	-0.784614	0.118264	-1.91173	0.994505	-0.784614	-1.56923	2.54376e-05
rs199811974	0.164785	1.81322	0.992359	-0.805821	0.164785	1.81322	0.992359	-0.805821	-1.61164	2.43813e-05
rs117279291	0.110994	-1.90349	0.994841	-0.831183	0.110994	-1.90349	0.994841	-0.831183	-1.66237	2.31754e-05
rs35090961	0.104934	1.91631	0.995121	-0.834251	0.104934	1.91631	0.995121	-0.834251	-1.6685	2.30336e-05
rs566944399	0.100068	-1.92764	0.995346	-0.835779	0.100068	-1.92764	0.995346	-0.835779	-1.67156	2.29633e-05
rs539313346	0.0908504	1.95191	0.995773	-0.836216	0.0908504	1.95191	0.995773	-0.836216	-1.67243	2.29433e-05
rs141413471	0.141576	-1.81976	0.993429	-0.867624	0.141576	-1.81976	0.993429	-0.867624	-1.73525	2.15464e-05
rs17105494	0.0072756	2.49488	0.99966	-0.882381	0.0072756	2.49488	0.99966	-0.882381	-1.76476	2.09197e-05
rs76322089	0.121079	1.84829	0.994375	-0.891746	0.121079	1.84829	0.994375	-0.891746	-1.78349	2.05316e-05
rs143156324	0.165507	1.76026	0.992326	-0.897605	0.165507	1.76026	0.992326	-0.897605	-1.79521	2.02924e-05
rs185406319	0.0945913	-1.90629	0.9956	-0.904068	0.0945913	-1.90629	0.9956	-0.904068	-1.80814	2.00318e-05
rs541064842	0.264866	1.61618	0.987776	-0.912109	0.264866	1.61618	0.987776	-0.912109	-1.82422	1.97122e-05
rs543075360	0.183917	1.69555	0.99148	-0.957473	0.183917	1.69555	0.99148	-0.957473	-1.91495	1.80025e-05
rs117774962	0.0299685	2.15637	0.998602	-0.964551	0.0299685	2.15637	0.998602	-0.964551	-1.9291	1.77494e-05
rs4902718	0.00986428	2.38522	0.999539	-0.99807	0.00986428	2.38522	0.999539	-0.99807	-1.99614	1.65986e-05
rs550737373	0.157258	-1.71042	0.992706	-1.00825	0.157258	-1.71042	0.992706	-1.00825	-2.0165	1.62641e-05
rs74414878	0.0288215	2.12559	0.998655	-1.04972	0.0288215	2.12559	0.998655	-1.04972	-2.09943	1.49696e-05
rs11158750	0.004719	2.51133	0.99978	-1.05724	0.004719	2.51133	0.99978	-1.05724	-2.11448	1.47461e-05
rs756779741	0.0534946	1.95366	0.997507	-1.09345	0.0534946	1.95366	0.997507	-1.09345	-2.1869	1.37159e-05
rs143812464	0.0978269	-1.78699	0.99545	-1.10691	0.0978269	-1.78699	0.99545	-1.10691	-2.21382	1.33516e-05
rs10133625	0.00400366	-2.51594	0.999813	-1.12773	0.00400366	-2.51594	0.999813	-1.12773	-2.25545	1.28071e-05
rs17828548	0.0104391	2.31424	0.999512	-1.13653	0.0104391	2.31424	0.999512	-1.13653	-2.27307	1.25835e-05
rs12882030	0.0047234	2.4746	0.999779	-1.14832	0.0047234	2.4746	0.999779	-1.14832	-2.29664	1.22903e-05
rs530015269	0.13602	-1.66615	0.993685	-1.15314	0.13602	-1.66615	0.993685	-1.15314	-2.30628	1.21725e-05
rs143937686	0.0975375	-1.74338	0.995463	-1.18499	0.0975375	-1.74338	0.995463	-1.18499	-2.36997	1.14214e-05
rs146342084	0.100065	-1.73313	0.995346	-1.19016	0.100065	-1.73313	0.995346	-1.19016	-2.38032	1.13037e-05
rs78286636	0.121438	-1.67652	0.994358	-1.19133	0.121438	-1.67652	0.994358	-1.19133	-2.38265	1.12774e-05
rs141094009	0.0642384	-1.85425	0.997008	-1.19185	0.0642384	-1.85425	0.997008	-1.19185	-2.3837	1.12656e-05
rs74534294	0.0104115	2.27999	0.999514	-1.21651	0.0104115	2.27999	0.999514	-1.21651	-2.43302	1.07235e-05
rs76348667	0.0104122	2.27989	0.999514	-1.2167	0.0104122	2.27989	0.999514	-1.2167	-2.4334	1.07194e-05
rs45557240	0.0801768	1.77134	0.996268	-1.23241	0.0801768	1.77134	0.996268	-1.23241	-2.46483	1.03878e-05
rs138970113	0.0664119	-1.81996	0.996907	-1.23823	0.0664119	-1.81996	0.996907	-1.23823	-2.47646	1.02677e-05
rs877506	0.0047345	2.43333	0.999779	-1.2484	0.0047345	2.43333	0.999779	-1.2484	-2.49681	1.00608e-05
rs17105837	0.00473253	2.42744	0.999779	-1.26292	0.00473253	2.42744	0.999779	-1.26292	-2.52585	9.77287e-06
rs34615104	0.057377	-1.8354	0.997326	-1.28231	0.057377	-1.8354	0.997326	-1.28231	-2.56461	9.40125e-06
rs143037015	0.11933	1.6078	0.994455	-1.31212	0.11933	1.6078	0.994455	-1.31212	-2.62423	8.85714e-06
rs78374209	0.0831965	1.70329	0.996128	-1.33198	0.0831965	1.70329	0.996128	-1.33198	-2.66396	8.51213e-06
rs61981591	0.0803439	-1.71146	0.99626	-1.33527	0.0803439	-1.71146	0.99626	-1.33527	-2.67054	8.45634e-06
rs117414736	0.0191775	-2.0823	0.999105	-1.34316	0.0191775	-2.0823	0.999105	-1.34316	-2.68633	8.32389e-06
rs79475966	0.0137823	2.15538	0.999356	-1.35293	0.0137823	2.15538	0.999356	-1.35293	-2.70585	8.16292e-06
rs4902600	0.106205	-1.60214	0.995062	-1.37833	0.106205	-1.60214	0.995062	-1.37833	-2.75667	7.75849e-06
rs12590642	0.00776885	2.26291	0.999637	-1.40131	0.00776885	2.26291	0.999637	-1.40131	-2.80261	7.41009e-06
rs145401609	0.0169622	2.07875	0.999208	-1.41165	0.0169622	2.07875	0.999208	-1.41165	-2.82329	7.25842e-06
rs34859711	0.00812756	-2.24782	0.99962	-1.41279	0.00812756	-2.24782	0.99962	-1.41279	-2.82559	7.24181e-06
rs72731584	0.026915	1.96323	0.998744	-1.41519	0.026915	1.96323	0.998744	-1.41519	-2.83039	7.20711e-06
rs74059309	0.00959953	2.20858	0.999552	-1.41719	0.00959953	2.20858	0.999552	-1.41719	-2.83438	7.17843e-06
rs117352495	0.0663567	1.71691	0.996909	-1.42032	0.0663567	1.71691	0.996909	-1.42032	-2.84065	7.13355e-06
rs2842333	0.0046445	-2.35518	0.999783	-1.44506	0.0046445	-2.35518	0.999783	-1.44506	-2.89012	6.78925e-06
rs56086327	0.00959391	2.19548	0.999552	-1.4463	0.00959391	2.19548	0.999552	-1.4463	-2.8926	6.77238e-06
rs147787741	0.0773346	-1.64513	0.9964	-1.465	0.0773346	-1.64513	0.9964	-1.465	-2.93	6.52379e-06
rs729138	0.0108768	2.1552	0.999492	-1.4713	0.0108768	2.1552	0.999492	-1.4713	-2.94261	6.44205e-06
rs4902680	0.00376779	-2.38701	0.999824	-1.47407	0.00376779	-2.38701	0.999824	-1.47407	-2.94815	6.40649e-06
rs35410490	0.00355811	-2.39112	0.999834	-1.49285	0.00355811	-2.39112	0.999834	-1.49285	-2.9857	6.17038e-06
rs1023530	0.00498573	2.31662	0.999767	-1.49971	0.00498573	2.31662	0.999767	-1.49971	-2.99942	6.08626e-06
rs117358381	0.016649	2.0336	0.999223	-1.51369	0.016649	2.0336	0.999223	-1.51369	-3.02738	5.91843e-06
rs147716003	0.0627152	1.67722	0.997078	-1.51537	0.0627152	1.67722	0.997078	-1.51537	-3.03074	5.89864e-06
rs117134525	0.0168283	2.02765	0.999214	-1.52042	0.0168283	2.02765	0.999214	-1.52042	-3.04084	5.83932e-06
rs116976678	0.0166462	2.02223	0.999223	-1.53681	0.0166462	2.02223	0.999223	-1.53681	-3.07362	5.651e-06
rs71423308	0.0247952	1.91989	0.998843	-1.54003	0.0247952	1.91989	0.998843	-1.54003	-3.08006	5.61472e-06
rs75260385	0.0166317	2.02009	0.999224	-1.54156	0.0166317	2.02009	0.999224	-1.54156	-3.08312	5.59756e-06
rs144076548	0.069874	1.62285	0.996746	-1.55138	0.069874	1.62285	0.996746	-1.55138	-3.10275	5.48876e-06
rs117409115	0.0412411	-1.76938	0.998077	-1.56454	0.0412411	-1.76938	0.998077	-1.56454	-3.12908	5.34615e-06
rs28368881	0.0207084	-1.95254	0.999033	-1.56647	0.0207084	-1.95254	0.999033	-1.56647	-3.13294	5.32554e-06
rs72718219	0.00717455	-2.19612	0.999665	-1.58987	0.00717455	-2.19612	0.999665	-1.58987	-3.17974	5.08205e-06
rs2284906	0.00880047	-2.14725	0.999589	-1.59404	0.00880047	-2.14725	0.999589	-1.59404	-3.18809	5.03981e-06
rs148073384	0.0168483	1.98916	0.999213	-1.59707	0.0168483	1.98916	0.999213	-1.59707	-3.19415	5.00936e-06
rs72727481	0.0125835	-2.05041	0.999412	-1.61887	0.0125835	-2.05041	0.999412	-1.61887	-3.23774	4.79566e-06
rs112639258	0.0104213	2.09473	0.999513	-1.62106	0.0104213	2.09473	0.999513	-1.62106	-3.24211	4.77477e-06
rs10132294	0.00530398	2.24984	0.999752	-1.62127	0.00530398	2.24984	0.999752	-1.62127	-3.24254	4.77273e-06
rs72720238	0.0217804	1.91	0.998983	-1.62344	0.0217804	1.91	0.998983	-1.62344	-3.24689	4.75202e-06
rs1470998	0.0533199	-1.64585	0.997515	-1.64768	0.0533199	-1.64585	0.997515	-1.64768	-3.29536	4.52717e-06
rs12588658	0.00716879	-2.16774	0.999665	-1.65216	0.00716879	-2.16774	0.999665	-1.65216	-3.30432	4.48679e-06
rs76390695	0.0102655	2.07818	0.999521	-1.66309	0.0102655	2.07818	0.999521	-1.66309	-3.32619	4.38973e-06
rs117254930	0.05464	1.62355	0.997454	-1.67192	0.05464	1.62355	0.997454	-1.67192	-3.34384	4.31293e-06
rs148577446	0.0175004	-1.94081	0.999183	-1.67309	0.0175004	-1.94081	0.999183	-1.67309	-3.34618	4.30284e-06
rs79592450	0.0327375	-1.7728	0.998473	-1.67313	0.0327375	-1.7728	0.998473	-1.67313	-3.34626	4.30251e-06
rs140503338	0.0542238	1.62342	0.997473	-1.67592	0.0542238	1.62342	0.997473	-1.67592	-3.35183	4.2786e-06
rs61980356	0.0174911	-1.93812	0.999183	-1.67857	0.0174911	-1.93812	0.999183	-1.67857	-3.35714	4.25593e-06
rs117931926	0.0104073	2.06494	0.999514	-1.68367	0.0104073	2.06494	0.999514	-1.68367	-3.36733	4.21279e-06
rs61982404	0.0174459	-1.93373	0.999186	-1.68835	0.0174459	-1.93373	0.999186	-1.68835	-3.3767	4.17352e-06
rs11537776	0.0174483	-1.93299	0.999185	-1.6897	0.0174483	-1.93299	0.999185	-1.6897	-3.37941	4.16221e-06
rs72625683	0.0174721	-1.92976	0.999184	-1.69526	0.0174721	-1.92976	0.999184	-1.69526	-3.39052	4.11622e-06
rs12589533	0.0174721	-1.92975	0.999184	-1.69529	0.0174721	-1.92975	0.999184	-1.69529	-3.39058	4.11598e-06
rs55905601	0.0103952	2.05914	0.999515	-1.69619	0.0103952	2.05914	0.999515	-1.69619	-3.39239	4.10855e-06
rs61982389	0.0174726	-1.92908	0.999184	-1.69657	0.0174726	-1.92908	0.999184	-1.69657	-3.39314	4.10545e-06
rs12589107	0.0174959	-1.92659	0.999183	-1.70069	0.0174959	-1.92659	0.999183	-1.70069	-3.40139	4.07172e-06
rs12588551	0.0174961	-1.92656	0.999183	-1.70074	0.0174961	-1.92656	0.999183	-1.70074	-3.40149	4.07132e-06
rs61982365	0.0174961	-1.92656	0.999183	-1.70074	0.0174961	-1.92656	0.999183	-1.70074	-3.40149	4.07132e-06
rs78366067	0.032951	-1.74121	0.998463	-1.72531	0.032951	-1.74121	0.998463	-1.72531	-3.45061	3.87615e-06
rs117967122	0.031436	-1.74188	0.998533	-1.74755	0.031436	-1.74188	0.998533	-1.74755	-3.49509	3.70752e-06
rs10132579	0.00543663	2.18674	0.999746	-1.74887	0.00543663	2.18674	0.999746	-1.74887	-3.49773	3.69774e-06
rs10220679	0.0142287	-1.9545	0.999336	-1.74956	0.0142287	-1.9545	0.999336	-1.74956	-3.49912	3.69263e-06
rs113145157	0.010372	2.03308	0.999516	-1.75061	0.010372	2.03308	0.999516	-1.75061	-3.50122	3.68488e-06
rs10151706	0.0142389	-1.95028	0.999335	-1.75744	0.0142389	-1.95028	0.999335	-1.75744	-3.51488	3.63487e-06
rs61987463	0.0342739	1.71031	0.998401	-1.75899	0.0342739	1.71031	0.998401	-1.75899	-3.51798	3.62365e-06
rs34987391	0.0260748	1.78541	0.998783	-1.76385	0.0260748	1.78541	0.998783	-1.76385	-3.52771	3.58854e-06
rs11378175	0.014093	-1.94559	0.999342	-1.7717	0.014093	-1.94559	0.999342	-1.7717	-3.5434	3.53268e-06
rs113771326	0.0308003	1.72749	0.998563	-1.78261	0.0308003	1.72749	0.998563	-1.78261	-3.56523	3.4564e-06
rs112546150	0.0194318	1.85279	0.999093	-1.78777	0.0194318	1.85279	0.999093	-1.78777	-3.57554	3.42093e-06
rs72731570	0.0273132	1.74989	0.998725	-1.80348	0.0273132	1.74989	0.998725	-1.80348	-3.60695	3.31515e-06
rs80192296	0.0190255	1.84695	0.999112	-1.80909	0.0190255	1.84695	0.999112	-1.80909	-3.61818	3.27814e-06
rs17758097	0.00891521	-2.03962	0.999584	-1.81279	0.00891521	-2.03962	0.999584	-1.81279	-3.62559	3.25395e-06
rs12895970	0.0260083	1.75661	0.998786	-1.81606	0.0260083	1.75661	0.998786	-1.81606	-3.63213	3.23274e-06
rs748769287	0.0429414	-1.60692	0.997998	-1.8182	0.0429414	-1.60692	0.997998	-1.8182	-3.6364	3.21895e-06
rs7144924	0.00893573	-2.03422	0.999583	-1.82264	0.00893573	-2.03422	0.999583	-1.82264	-3.64528	3.19048e-06
rs12148014	0.0258418	1.75443	0.998794	-1.82309	0.0258418	1.75443	0.998794	-1.82309	-3.64617	3.18766e-06
rs55820001	0.0101913	2.00141	0.999524	-1.82324	0.0101913	2.00141	0.999524	-1.82324	-3.64648	3.18668e-06
rs1275049	0.0139504	-1.9184	0.999349	-1.82927	0.0139504	-1.9184	0.999349	-1.82927	-3.65854	3.14847e-06
rs55792576	0.010352	1.99399	0.999517	-1.83023	0.010352	1.99399	0.999517	-1.83023	-3.66046	3.14242e-06
rs55794864	0.010352	1.99368	0.999517	-1.83086	0.010352	1.99368	0.999517	-1.83086	-3.66172	3.13848e-06
rs11158748	0.00349221	2.24759	0.999837	-1.83503	0.00349221	2.24759	0.999837	-1.83503	-3.67006	3.11241e-06
rs78618613	0.0103604	1.98964	0.999516	-1.83851	0.0103604	1.98964	0.999516	-1.83851	-3.67702	3.09082e-06
rs61982405	0.0103012	1.99068	0.999519	-1.83929	0.0103012	1.99068	0.999519	-1.83929	-3.67858	3.08601e-06
rs36098448	0.0258904	1.74421	0.998792	-1.84	0.0258904	1.74421	0.998792	-1.84	-3.68	3.08161e-06
rs78479750	0.0256884	-1.7395	0.998801	-1.85209	0.0256884	-1.7395	0.998801	-1.85209	-3.70419	3.00798e-06
rs75120172	0.0211458	-1.79272	0.999013	-1.85507	0.0211458	-1.79272	0.999013	-1.85507	-3.71013	2.99014e-06
rs111758115	0.0229008	-1.75712	0.998931	-1.87849	0.0229008	-1.75712	0.998931	-1.87849	-3.75699	2.85328e-06
rs76549625	0.0190487	1.80776	0.999111	-1.88002	0.0190487	1.80776	0.999111	-1.88002	-3.76005	2.84456e-06
rs1108007	0.0257516	-1.72155	0.998798	-1.88189	0.0257516	-1.72155	0.998798	-1.88189	-3.76378	2.83397e-06
rs76261186	0.0189789	1.80329	0.999114	-1.88991	0.0189789	1.80329	0.999114	-1.88991	-3.77983	2.78885e-06
rs116996368	0.0257189	-1.71243	0.9988	-1.89817	0.0257189	-1.71243	0.9988	-1.89817	-3.79634	2.74318e-06
rs1455054	0.0174964	-1.81997	0.999183	-1.90024	0.0174964	-1.81997	0.999183	-1.90024	-3.80049	2.73183e-06
rs189019884	0.0107614	1.94662	0.999497	-1.90418	0.0107614	1.94662	0.999497	-1.90418	-3.80836	2.71041e-06
rs118036475	0.0204573	-1.77344	0.999045	-1.90589	0.0204573	-1.77344	0.999045	-1.90589	-3.81177	2.70117e-06
rs61987464	0.0333227	1.62953	0.998445	-1.90767	0.0333227	1.62953	0.998445	-1.90767	-3.81535	2.69153e-06
rs78861269	0.0246609	-1.71643	0.998849	-1.91223	0.0246609	-1.71643	0.998849	-1.91223	-3.82446	2.6671e-06
rs151063677	0.0323701	1.63164	0.99849	-1.91865	0.0323701	1.63164	0.99849	-1.91865	-3.8373	2.63308e-06
rs112340077	0.0327295	-1.62107	0.998473	-1.93032	0.0327295	-1.62107	0.998473	-1.93032	-3.86065	2.57232e-06
rs438354	0.014108	-1.84572	0.999341	-1.96037	0.014108	-1.84572	0.999341	-1.96037	-3.92074	2.42229e-06
rs4902577	0.00615381	2.05749	0.999713	-1.96122	0.00615381	2.05749	0.999713	-1.96122	-3.92244	2.41818e-06
rs4902576	0.00615247	2.05632	0.999713	-1.96373	0.00615247	2.05632	0.999713	-1.96373	-3.92746	2.40609e-06
rs10130940	0.0142127	-1.83866	0.999336	-1.96969	0.0142127	-1.83866	0.999336	-1.96969	-3.93938	2.37757e-06
rs9323508	0.00328346	2.19776	0.999847	-1.97655	0.00328346	2.19776	0.999847	-1.97655	-3.9531	2.34517e-06
rs12889770	0.00613877	2.04821	0.999713	-1.98148	0.00613877	2.04821	0.999713	-1.98148	-3.96295	2.32217e-06
rs77539346	0.0200013	-1.73491	0.999066	-1.98464	0.0200013	-1.73491	0.999066	-1.98464	-3.96928	2.30754e-06
rs79192675	0.00971849	-1.9297	0.999546	-1.98782	0.00971849	-1.9297	0.999546	-1.98782	-3.97565	2.29288e-06
rs67356344	0.00890702	-1.95153	0.999584	-1.98897	0.00890702	-1.95153	0.999584	-1.98897	-3.97793	2.28765e-06
rs58291960	0.00890702	-1.9514	0.999584	-1.98923	0.00890702	-1.9514	0.999584	-1.98923	-3.97847	2.28642e-06
rs11850741	0.00891221	-1.93678	0.999584	-2.01734	0.00891221	-1.93678	0.999584	-2.01734	-4.03469	2.16143e-06
rs10131417	0.00891795	-1.93403	0.999583	-2.02235	0.00891795	-1.93403	0.999583	-2.02235	-4.04469	2.13991e-06
rs74060136	0.0188626	1.7264	0.999119	-2.02857	0.0188626	1.7264	0.999119	-2.02857	-4.05714	2.11344e-06
rs10139107	0.00644907	2.01191	0.999699	-2.03052	0.00644907	2.01191	0.999699	-2.03052	-4.06104	2.10521e-06
rs11847083	0.00892556	-1.9259	0.999583	-2.0376	0.00892556	-1.9259	0.999583	-2.0376	-4.0752	2.07561e-06
rs11846999	0.00892537	-1.92574	0.999583	-2.03792	0.00892537	-1.92574	0.999583	-2.03792	-4.07584	2.07429e-06
rs56019640	0.0189789	1.71613	0.999114	-2.04316	0.0189789	1.71613	0.999114	-2.04316	-4.08632	2.05266e-06
rs113746968	0.00891833	-1.92122	0.999583	-2.04701	0.00891833	-1.92122	0.999583	-2.04701	-4.09402	2.03692e-06
rs140424686	0.00892377	-1.92105	0.999583	-2.04704	0.00892377	-1.92105	0.999583	-2.04704	-4.09407	2.0368e-06
rs17835991	0.00892983	-1.91788	0.999583	-2.05278	0.00892983	-1.91788	0.999583	-2.05278	-4.10557	2.01353e-06
rs34278781	0.017735	-1.72996	0.999172	-2.05313	0.017735	-1.72996	0.999172	-2.05313	-4.10626	2.01214e-06
rs11158733	0.00628237	2.00482	0.999707	-2.05784	0.00628237	2.00482	0.999707	-2.05784	-4.11567	1.99329e-06
rs114789616	0.0122585	-1.82769	0.999428	-2.06354	0.0122585	-1.82769	0.999428	-2.06354	-4.12708	1.97067e-06
rs17105522	0.025469	-1.60303	0.998811	-2.08417	0.025469	-1.60303	0.998811	-2.08417	-4.16835	1.89101e-06
rs7160842	0.00329904	2.13967	0.999846	-2.10014	0.00329904	2.13967	0.999846	-2.10014	-4.20029	1.83156e-06
rs8004349	0.0190655	1.67895	0.99911	-2.10395	0.0190655	1.67895	0.99911	-2.10395	-4.2079	1.81767e-06
rs4902583	0.00422539	-2.07815	0.999803	-2.10624	0.00422539	-2.07815	0.999803	-2.10624	-4.21249	1.80935e-06
rs117742459	0.0255549	-1.58791	0.998807	-2.10658	0.0255549	-1.58791	0.998807	-2.10658	-4.21317	1.80813e-06
rs12889666	0.00632017	1.97631	0.999705	-2.11157	0.00632017	1.97631	0.999705	-2.11157	-4.22314	1.79018e-06
rs12886429	0.0064783	1.96705	0.999697	-2.11749	0.0064783	1.96705	0.999697	-2.11749	-4.23497	1.76912e-06
rs12432583	0.00773789	1.92025	0.999639	-2.11974	0.00773789	1.92025	0.999639	-2.11974	-4.23948	1.76117e-06
rs2331694	0.00773696	1.91704	0.999639	-2.12594	0.00773696	1.91704	0.999639	-2.12594	-4.25189	1.73945e-06
rs450420	0.0140299	-1.75508	0.999345	-2.12621	0.0140299	-1.75508	0.999345	-2.12621	-4.25242	1.73852e-06
rs10146058	0.00646509	1.95957	0.999698	-2.13319	0.00646509	1.95957	0.999698	-2.13319	-4.26638	1.71443e-06
rs10782456	0.00646521	1.9584	0.999698	-2.13548	0.00646521	1.9584	0.999698	-2.13548	-4.27096	1.70659e-06
rs4902596	0.0064682	1.95722	0.999698	-2.13755	0.0064682	1.95722	0.999698	-2.13755	-4.27509	1.69955e-06
rs36048264	0.0034784	-2.10731	0.999838	-2.1424	0.0034784	-2.10731	0.999838	-2.1424	-4.28481	1.68312e-06
rs73280851	0.0177958	1.67529	0.999169	-2.14443	0.0177958	1.67529	0.999169	-2.14443	-4.28887	1.6763e-06
rs12898087	0.00630485	1.95744	0.999706	-2.14989	0.00630485	1.95744	0.999706	-2.14989	-4.29978	1.65811e-06
rs59946997	0.0177889	1.67071	0.99917	-2.15228	0.0177889	1.67071	0.99917	-2.15228	-4.30456	1.6502e-06
rs74611987	0.0123492	-1.77209	0.999423	-2.15988	0.0123492	-1.77209	0.999423	-2.15988	-4.31975	1.62532e-06
rs73276276	0.0155673	1.70287	0.999273	-2.16457	0.0155673	1.70287	0.999273	-2.16457	-4.32914	1.61014e-06
rs77050458	0.0123463	-1.76931	0.999423	-2.16491	0.0123463	-1.76931	0.999423	-2.16491	-4.32983	1.60903e-06
rs73290561	0.012359	-1.76716	0.999423	-2.1682	0.012359	-1.76716	0.999423	-2.1682	-4.3364	1.59849e-06
rs79594844	0.0123561	-1.76677	0.999423	-2.169	0.0123561	-1.76677	0.999423	-2.169	-4.338	1.59593e-06
rs72718216	0.00886982	-1.85639	0.999586	-2.17214	0.00886982	-1.85639	0.999586	-2.17214	-4.34427	1.58595e-06
rs11625452	0.00330346	-2.10531	0.999846	-2.1724	0.00330346	-2.10531	0.999846	-2.1724	-4.34481	1.5851e-06
rs75680817	0.0123614	-1.76443	0.999423	-2.17292	0.0123614	-1.76443	0.999423	-2.17292	-4.34583	1.58348e-06
rs1710993	0.0177114	-1.65935	0.999173	-2.17336	0.0177114	-1.65935	0.999173	-2.17336	-4.34671	1.58209e-06
rs76070943	0.0123603	-1.76245	0.999423	-2.17645	0.0123603	-1.76245	0.999423	-2.17645	-4.3529	1.57232e-06
rs7141919	0.0176119	-1.65879	0.999178	-2.17709	0.0176119	-1.65879	0.999178	-2.17709	-4.35418	1.57031e-06
rs72718217	0.00887833	-1.85228	0.999585	-2.17927	0.00887833	-1.85228	0.999585	-2.17927	-4.35854	1.56349e-06
rs10148720	0.00646273	1.93398	0.999698	-2.18317	0.00646273	1.93398	0.999698	-2.18317	-4.36635	1.55132e-06
rs74375704	0.0190829	1.62465	0.999109	-2.19311	0.0190829	1.62465	0.999109	-2.19311	-4.38621	1.52081e-06
rs113913194	0.00877879	-1.84696	0.99959	-2.19474	0.00877879	-1.84696	0.99959	-2.19474	-4.38948	1.51585e-06
rs6573870	0.0176816	-1.64494	0.999175	-2.19798	0.0176816	-1.64494	0.999175	-2.19798	-4.39597	1.50605e-06
rs72718210	0.00875207	-1.84204	0.999591	-2.20533	0.00875207	-1.84204	0.999591	-2.20533	-4.41067	1.48407e-06
rs72718212	0.00875529	-1.84067	0.999591	-2.20766	0.00875529	-1.84067	0.999591	-2.20766	-4.41533	1.47717e-06
rs4902595	0.00645739	1.92108	0.999698	-2.20845	0.00645739	1.92108	0.999698	-2.20845	-4.4169	1.47486e-06
rs730635	0.00875229	-1.83411	0.999591	-2.21988	0.00875229	-1.83411	0.999591	-2.21988	-4.43976	1.44152e-06
rs12587397	0.00645368	1.91033	0.999699	-2.22932	0.00645368	1.91033	0.999699	-2.22932	-4.45865	1.41455e-06
rs79805373	0.0122105	-1.73541	0.99943	-2.22979	0.0122105	-1.73541	0.99943	-2.22979	-4.45959	1.41321e-06
rs73290565	0.0122138	-1.73502	0.99943	-2.23035	0.0122138	-1.73502	0.99943	-2.23035	-4.4607	1.41165e-06
rs74059928	0.0122268	-1.73016	0.999429	-2.23823	0.0122268	-1.73016	0.999429	-2.23823	-4.47647	1.38957e-06
rs55926514	0.00733056	-1.87133	0.999658	-2.23943	0.00733056	-1.87133	0.999658	-2.23943	-4.47886	1.38624e-06
rs11844858	0.0122186	-1.72542	0.999429	-2.24674	0.0122186	-1.72542	0.999429	-2.24674	-4.49347	1.36613e-06
rs74059930	0.0122235	-1.7246	0.999429	-2.24796	0.0122235	-1.7246	0.999429	-2.24796	-4.49591	1.3628e-06
rs58347380	0.00332202	-2.06406	0.999845	-2.25559	0.00332202	-2.06406	0.999845	-2.25559	-4.51117	1.34216e-06
rs111503779	0.0122352	-1.71959	0.999429	-2.2561	0.0122352	-1.71959	0.999429	-2.2561	-4.51221	1.34077e-06
rs59222679	0.00330295	-2.06421	0.999846	-2.25814	0.00330295	-2.06421	0.999846	-2.25814	-4.51628	1.33533e-06
rs5809417	0.0177948	-1.60482	0.999169	-2.25994	0.0177948	-1.60482	0.999169	-2.25994	-4.51988	1.33053e-06
rs35657710	0.00686991	-1.87509	0.999679	-2.26479	0.00686991	-1.87509	0.999679	-2.26479	-4.52958	1.31769e-06
rs3784131	0.00760058	1.84574	0.999645	-2.26892	0.00760058	1.84574	0.999645	-2.26892	-4.53784	1.30684e-06
rs28655994	0.0152898	1.64317	0.999286	-2.27336	0.0152898	1.64317	0.999286	-2.27336	-4.54671	1.2953e-06
rs2525511	0.00382264	-2.01845	0.999821	-2.27853	0.00382264	-2.01845	0.999821	-2.27853	-4.55706	1.28196e-06
rs4048737	0.00329546	-2.05415	0.999846	-2.27998	0.00329546	-2.05415	0.999846	-2.27998	-4.55996	1.27825e-06
rs1570107	0.0152485	1.62904	0.999288	-2.2978	0.0152485	1.62904	0.999288	-2.2978	-4.5956	1.2335e-06
rs10133813	0.00642024	1.87022	0.9997	-2.30771	0.00642024	1.87022	0.9997	-2.30771	-4.61543	1.20928e-06
rs8021199	0.00328684	-2.03659	0.999846	-2.3172	0.00328684	-2.03659	0.999846	-2.3172	-4.6344	1.18655e-06
rs7152904	0.0165887	1.58754	0.999226	-2.32248	0.0165887	1.58754	0.999226	-2.32248	-4.64497	1.17409e-06
rs9743605	0.0152673	1.61256	0.999287	-2.32389	0.0152673	1.61256	0.999287	-2.32389	-4.64777	1.17079e-06
rs12888301	0.00739051	1.81949	0.999655	-2.331	0.00739051	1.81949	0.999655	-2.331	-4.66201	1.15425e-06
rs9743886	0.0152483	1.59758	0.999288	-2.34852	0.0152483	1.59758	0.999288	-2.34852	-4.69705	1.1145e-06
rs11158734	0.00612953	1.85827	0.999714	-2.35313	0.00612953	1.85827	0.999714	-2.35313	-4.70627	1.10428e-06
rs11627490	0.00327732	-2.01838	0.999847	-2.35558	0.00327732	-2.01838	0.999847	-2.35558	-4.71115	1.09889e-06
rs7144886	0.00686845	-1.82558	0.999679	-2.35648	0.00686845	-1.82558	0.999679	-2.35648	-4.71297	1.0969e-06
rs113130313	0.0127094	1.64713	0.999407	-2.35904	0.0127094	1.64713	0.999407	-2.35904	-4.71808	1.09131e-06
rs61980354	0.00676334	-1.82835	0.999684	-2.35912	0.00676334	-1.82835	0.999684	-2.35912	-4.71823	1.09114e-06
rs12589991	0.0068686	-1.82248	0.999679	-2.36212	0.0068686	-1.82248	0.999679	-2.36212	-4.72424	1.08461e-06
rs35045162	0.00910748	-1.7431	0.999575	-2.36275	0.00910748	-1.7431	0.999575	-2.36275	-4.7255	1.08324e-06
rs61980352	0.00686893	-1.81763	0.999679	-2.37093	0.00686893	-1.81763	0.999679	-2.37093	-4.74187	1.06565e-06
rs55735640	0.00733738	-1.79784	0.999657	-2.37375	0.00733738	-1.79784	0.999657	-2.37375	-4.74751	1.05966e-06
rs71423357	0.0068854	-1.81539	0.999678	-2.3738	0.0068854	-1.81539	0.999678	-2.3738	-4.74759	1.05957e-06
rs148913511	0.00504295	1.89858	0.999764	-2.37488	0.00504295	1.89858	0.999764	-2.37488	-4.74976	1.05728e-06
rs61039700	0.00328645	-2.00802	0.999846	-2.37504	0.00328645	-2.00802	0.999846	-2.37504	-4.75007	1.05694e-06
rs181455	0.00340171	-1.99752	0.999841	-2.37883	0.00340171	-1.99752	0.999841	-2.37883	-4.75767	1.04895e-06
rs67557659	0.00342615	-1.99432	0.99984	-2.38166	0.00342615	-1.99432	0.99984	-2.38166	-4.76331	1.04304e-06
rs2268969	0.00694412	-1.80404	0.999676	-2.39009	0.00694412	-1.80404	0.999676	-2.39009	-4.78019	1.02559e-06
rs3784117	0.0077866	1.76634	0.999636	-2.40019	0.0077866	1.76634	0.999636	-2.40019	-4.80039	1.00508e-06
rs118040061	0.00366426	-1.95822	0.999829	-2.41942	0.00366426	-1.95822	0.999829	-2.41942	-4.83884	9.67165e-07
rs2842318	0.00329868	-1.98396	0.999846	-2.4212	0.00329868	-1.98396	0.999846	-2.4212	-4.8424	9.63733e-07
rs10135247	0.00753879	1.76124	0.999648	-2.42533	0.00753879	1.76124	0.999648	-2.42533	-4.85067	9.55798e-07
rs34516562	0.00688638	-1.78547	0.999678	-2.42757	0.00688638	-1.78547	0.999678	-2.42757	-4.85515	9.51523e-07
rs7145781	0.00688342	-1.77647	0.999678	-2.44382	0.00688342	-1.77647	0.999678	-2.44382	-4.88765	9.21097e-07
rs79983435	0.0106748	-1.64579	0.999501	-2.4483	0.0106748	-1.64579	0.999501	-2.4483	-4.89661	9.1288e-07
rs35724400	0.00688226	-1.77394	0.999679	-2.44839	0.00688226	-1.77394	0.999679	-2.44839	-4.89678	9.12722e-07
rs61980353	0.00688273	-1.77258	0.999679	-2.45077	0.00688273	-1.77258	0.999679	-2.45077	-4.90154	9.08388e-07
rs73290567	0.0124919	-1.59331	0.999417	-2.4548	0.0124919	-1.59331	0.999417	-2.4548	-4.90959	9.01102e-07
rs61982424	0.00690278	-1.76911	0.999678	-2.45546	0.00690278	-1.76911	0.999678	-2.45546	-4.91091	8.99914e-07
rs10142629	0.00752211	1.74441	0.999649	-2.45593	0.00752211	1.74441	0.999649	-2.45593	-4.91186	8.99062e-07
rs17106973	0.00687959	-1.76431	0.999679	-2.46561	0.00687959	-1.76431	0.999679	-2.46561	-4.93122	8.81825e-07
rs34230540	0.00688985	-1.76166	0.999678	-2.46954	0.00688985	-1.76166	0.999678	-2.46954	-4.93907	8.74925e-07
rs77049690	0.00525557	-1.83644	0.999755	-2.47027	0.00525557	-1.83644	0.999755	-2.47027	-4.94054	8.73639e-07
rs147678983	0.00697544	-1.75626	0.999674	-2.47288	0.00697544	-1.75626	0.999674	-2.47288	-4.94575	8.69099e-07
rs3950069	0.003284	-1.95745	0.999847	-2.47566	0.003284	-1.95745	0.999847	-2.47566	-4.95133	8.64269e-07
rs181454	0.00340167	-1.94643	0.999841	-2.47959	0.00340167	-1.94643	0.999841	-2.47959	-4.95918	8.57512e-07
rs61982420	0.0068991	-1.7548	0.999678	-2.48093	0.0068991	-1.7548	0.999678	-2.48093	-4.96186	8.55212e-07
rs2842327	0.00328978	1.95395	0.999846	-2.48163	0.00328978	1.95395	0.999846	-2.48163	-4.96325	8.54024e-07
rs181456	0.00340426	-1.94481	0.999841	-2.48235	0.00340426	-1.94481	0.999841	-2.48235	-4.9647	8.5279e-07
rs2274442	0.00728822	-1.73715	0.99966	-2.48435	0.00728822	-1.73715	0.99966	-2.48435	-4.96869	8.49391e-07
rs77815502	0.00831268	1.69756	0.999612	-2.48664	0.00831268	1.69756	0.999612	-2.48664	-4.97328	8.45504e-07
rs61982422	0.00690185	-1.75119	0.999678	-2.48706	0.00690185	-1.75119	0.999678	-2.48706	-4.97413	8.44788e-07
rs34218656	0.00690322	-1.75099	0.999678	-2.48731	0.00690322	-1.75099	0.999678	-2.48731	-4.97462	8.44373e-07
rs34621266	0.00688942	-1.74734	0.999678	-2.49468	0.00688942	-1.74734	0.999678	-2.49468	-4.98936	8.32015e-07
rs1010661	0.00483929	-1.84333	0.999774	-2.49882	0.00483929	-1.84333	0.999774	-2.49882	-4.99763	8.25162e-07
rs35123151	0.00688986	-1.74428	0.999678	-2.5	0.00688986	-1.74428	0.999678	-2.5	-5.00001	8.23204e-07
rs8014025	0.00329595	-1.94378	0.999846	-2.50051	0.00329595	-1.94378	0.999846	-2.50051	-5.00103	8.22363e-07
rs72625682	0.00689164	-1.74334	0.999678	-2.50151	0.00689164	-1.74334	0.999678	-2.50151	-5.00301	8.20734e-07
rs35695471	0.00688867	-1.74346	0.999678	-2.50151	0.00688867	-1.74346	0.999678	-2.50151	-5.00301	8.20733e-07
rs67081339	0.00689177	-1.74332	0.999678	-2.50153	0.00689177	-1.74332	0.999678	-2.50153	-5.00305	8.20702e-07
rs34433939	0.00688865	-1.74342	0.999678	-2.50159	0.00688865	-1.74342	0.999678	-2.50159	-5.00318	8.20599e-07
rs12232173	0.00689162	-1.7426	0.999678	-2.5028	0.00689162	-1.7426	0.999678	-2.5028	-5.00561	8.18605e-07
rs61982360	0.00689249	-1.74232	0.999678	-2.50323	0.00689249	-1.74232	0.999678	-2.50323	-5.00645	8.17916e-07
rs194721	0.00413099	1.88319	0.999807	-2.5036	0.00413099	1.88319	0.999807	-2.5036	-5.00721	8.17299e-07
rs35532206	0.00688927	-1.74211	0.999678	-2.50382	0.00688927	-1.74211	0.999678	-2.50382	-5.00764	8.16944e-07
rs8014234	0.0032968	-1.94088	0.999846	-2.50601	0.0032968	-1.94088	0.999846	-2.50601	-5.01203	8.13368e-07
rs12884978	0.00689001	-1.7404	0.999678	-2.50674	0.00689001	-1.7404	0.999678	-2.50674	-5.01348	8.12186e-07
rs34864264	0.00689308	-1.74009	0.999678	-2.50707	0.00689308	-1.74009	0.999678	-2.50707	-5.01413	8.11656e-07
rs12883441	0.00688965	-1.73975	0.999678	-2.5079	0.00688965	-1.73975	0.999678	-2.5079	-5.01581	8.10302e-07
rs61982397	0.00688965	-1.73975	0.999678	-2.5079	0.00688965	-1.73975	0.999678	-2.5079	-5.01581	8.10302e-07
rs35515794	0.00689337	-1.73879	0.999678	-2.50931	0.00689337	-1.73879	0.999678	-2.50931	-5.01862	8.08027e-07
rs35665244	0.00692038	-1.73748	0.999677	-2.50962	0.00692038	-1.73748	0.999677	-2.50962	-5.01924	8.07519e-07
rs12896978	0.00689016	-1.73859	0.999678	-2.50988	0.00689016	-1.73859	0.999678	-2.50988	-5.01977	8.07096e-07
rs61982398	0.00689053	-1.73799	0.999678	-2.5109	0.00689053	-1.73799	0.999678	-2.5109	-5.0218	8.05457e-07
rs34625331	0.00689066	-1.73778	0.999678	-2.51126	0.00689066	-1.73778	0.999678	-2.51126	-5.02251	8.04886e-07
rs34953569	0.00689066	-1.73778	0.999678	-2.51126	0.00689066	-1.73778	0.999678	-2.51126	-5.02251	8.04886e-07
rs61982401	0.00689099	-1.73751	0.999678	-2.5117	0.00689099	-1.73751	0.999678	-2.5117	-5.0234	8.04168e-07
rs1885014	0.0032713	-1.93965	0.999847	-2.51227	0.0032713	-1.93965	0.999847	-2.51227	-5.02455	8.0325e-07
rs11620922	0.0045535	-1.84899	0.999787	-2.51877	0.0045535	-1.84899	0.999787	-2.51877	-5.03754	7.92876e-07
rs3784123	0.00752837	1.70736	0.999648	-2.51944	0.00752837	1.70736	0.999648	-2.51944	-5.03888	7.91816e-07
rs12879627	0.00689597	-1.73211	0.999678	-2.5207	0.00689597	-1.73211	0.999678	-2.5207	-5.0414	7.89826e-07
rs12880219	0.00689473	-1.73189	0.999678	-2.52117	0.00689473	-1.73189	0.999678	-2.52117	-5.04233	7.89091e-07
rs34566782	0.00690275	-1.72862	0.999678	-2.52624	0.00690275	-1.72862	0.999678	-2.52624	-5.05248	7.81123e-07
rs11158804	0.00689064	-1.72897	0.999678	-2.52651	0.00689064	-1.72897	0.999678	-2.52651	-5.05302	7.80697e-07
rs36027932	0.00689348	-1.7255	0.999678	-2.53231	0.00689348	-1.7255	0.999678	-2.53231	-5.06462	7.717e-07
rs12879303	0.00689586	-1.72299	0.999678	-2.53647	0.00689586	-1.72299	0.999678	-2.53647	-5.07293	7.65307e-07
rs61985039	0.00612763	1.75515	0.999714	-2.53953	0.00612763	1.75515	0.999714	-2.53953	-5.07905	7.60638e-07
rs3784115	0.00327075	-1.92511	0.999847	-2.54045	0.00327075	-1.92511	0.999847	-2.54045	-5.08091	7.59229e-07
rs12586840	0.00809559	-1.67337	0.999622	-2.54061	0.00809559	-1.67337	0.999622	-2.54061	-5.08122	7.58993e-07
rs77614011	0.00689157	1.71806	0.999678	-2.54524	0.00689157	1.71806	0.999678	-2.54524	-5.09048	7.51993e-07
rs12893687	0.00690019	-1.71578	0.999678	-2.54855	0.00690019	-1.71578	0.999678	-2.54855	-5.09709	7.47039e-07
rs1742896	0.00340824	-1.90688	0.999841	-2.5548	0.00340824	-1.90688	0.999841	-2.5548	-5.1096	7.37755e-07
rs3784141	0.00689308	-1.71214	0.999678	-2.55529	0.00689308	-1.71214	0.999678	-2.55529	-5.11057	7.37039e-07
rs7147553	0.005258	-1.78765	0.999754	-2.55843	0.005258	-1.78765	0.999754	-2.55843	-5.11686	7.3242e-07
rs557618735	0.00731925	-1.69078	0.999658	-2.56166	0.00731925	-1.69078	0.999658	-2.56166	-5.12332	7.27704e-07
rs7401855	0.0034093	-1.89706	0.999841	-2.57332	0.0034093	-1.89706	0.999841	-2.57332	-5.14664	7.10932e-07
rs2755201	0.00340995	-1.88613	0.999841	-2.59391	0.00340995	-1.88613	0.999841	-2.59391	-5.18781	6.82253e-07
rs10129289	0.00340738	-1.8855	0.999841	-2.59546	0.00340738	-1.8855	0.999841	-2.59546	-5.19092	6.80134e-07
rs10136055	0.00749104	1.6577	0.99965	-2.60545	0.00749104	1.6577	0.99965	-2.60545	-5.2109	6.6668e-07
rs4902679	0.00361303	-1.85899	0.999831	-2.61581	0.00361303	-1.85899	0.999831	-2.61581	-5.23163	6.53006e-07
rs3784122	0.00748756	1.65138	0.99965	-2.61613	0.00748756	1.65138	0.99965	-2.61613	-5.23226	6.52589e-07
rs7150586	0.00328733	-1.88261	0.999846	-2.61882	0.00328733	-1.88261	0.999846	-2.61882	-5.23765	6.49084e-07
rs10146321	0.00607413	1.70814	0.999716	-2.62529	0.00607413	1.70814	0.999716	-2.62529	-5.25058	6.40745e-07
rs8022215	0.00720832	1.65465	0.999663	-2.6297	0.00720832	1.65465	0.999663	-2.6297	-5.25941	6.35115e-07
rs4902591	0.00749679	1.64086	0.99965	-2.63283	0.00749679	1.64086	0.99965	-2.63283	-5.26566	6.31153e-07
rs4902590	0.00749679	1.64081	0.99965	-2.63291	0.00749679	1.64081	0.99965	-2.63291	-5.26581	6.31058e-07
rs4899242	0.00749457	1.64029	0.99965	-2.63391	0.00749457	1.64029	0.99965	-2.63391	-5.26781	6.29797e-07
rs17106237	0.0073136	1.64107	0.999658	-2.64483	0.0073136	1.64107	0.999658	-2.64483	-5.28966	6.16188e-07
rs4902592	0.00750001	1.63172	0.99965	-2.64757	0.00750001	1.63172	0.99965	-2.64757	-5.29513	6.12824e-07
rs12891351	0.00328798	-1.86234	0.999846	-2.65669	0.00328798	-1.86234	0.999846	-2.65669	-5.31338	6.01745e-07
rs8020817	0.0032843	-1.86169	0.999847	-2.65846	0.0032843	-1.86169	0.999847	-2.65846	-5.31691	5.99621e-07
rs10143710	0.00328336	-1.86108	0.999847	-2.65973	0.00328336	-1.86108	0.999847	-2.65973	-5.31946	5.98098e-07
rs2124192	0.00328485	-1.8593	0.999847	-2.66282	0.00328485	-1.8593	0.999847	-2.66282	-5.32564	5.94414e-07
rs113101675	0.00517398	1.7327	0.999758	-2.66316	0.00517398	1.7327	0.999758	-2.66316	-5.32632	5.94005e-07
rs1657351	0.00341749	-1.84621	0.99984	-2.66729	0.00341749	-1.84621	0.99984	-2.66729	-5.33457	5.89125e-07
rs8016977	0.00364953	-1.82691	0.99983	-2.6699	0.00364953	-1.82691	0.99983	-2.6699	-5.3398	5.86053e-07
rs11623094	0.00328311	-1.85155	0.999847	-2.67745	0.00328311	-1.85155	0.999847	-2.67745	-5.3549	5.77271e-07
rs7141167	0.00530884	-1.71645	0.999752	-2.67832	0.00530884	-1.71645	0.999752	-2.67832	-5.35665	5.76264e-07
rs12435046	0.00329166	-1.85019	0.999846	-2.67867	0.00329166	-1.85019	0.999846	-2.67867	-5.35734	5.75864e-07
rs3759770	0.00328357	-1.84984	0.999847	-2.68056	0.00328357	-1.84984	0.999847	-2.68056	-5.36112	5.73694e-07
rs12590644	0.00485069	1.74054	0.999773	-2.68179	0.00485069	1.74054	0.999773	-2.68179	-5.36358	5.72281e-07
rs4902681	0.00419533	-1.76751	0.999804	-2.707	0.00419533	-1.76751	0.999804	-2.707	-5.41401	5.44139e-07
rs71423356	0.00395369	-1.77667	0.999815	-2.72041	0.00395369	-1.77667	0.999815	-2.72041	-5.44083	5.29738e-07
rs2525503	0.00329022	1.82692	0.999846	-2.72166	0.00329022	1.82692	0.999846	-2.72166	-5.44333	5.28417e-07
rs147723936	0.0039586	-1.77514	0.999815	-2.72251	0.0039586	-1.77514	0.999815	-2.72251	-5.44502	5.2752e-07
rs17106243	0.00540116	1.68367	0.999748	-2.72544	0.00540116	1.68367	0.999748	-2.72544	-5.45088	5.24441e-07
rs12588940	0.0042736	1.751	0.9998	-2.7268	0.0042736	1.751	0.9998	-2.7268	-5.4536	5.23016e-07
rs4902678	0.00368342	-1.78701	0.999828	-2.73736	0.00368342	-1.78701	0.999828	-2.73736	-5.47472	5.12086e-07
rs12884802	0.00395524	-1.76436	0.999815	-2.742	0.00395524	-1.76436	0.999815	-2.742	-5.484	5.07355e-07
rs36037391	0.00689627	-1.59315	0.999678	-2.75165	0.00689627	-1.59315	0.999678	-2.75165	-5.5033	4.97658e-07
rs4902677	0.00362785	-1.77437	0.999831	-2.76747	0.00362785	-1.77437	0.999831	-2.76747	-5.53494	4.82157e-07
rs4902719	0.00328859	-1.80014	0.999846	-2.77048	0.00328859	-1.80014	0.999846	-2.77048	-5.54096	4.79264e-07
rs28879441	0.00328516	-1.799	0.999847	-2.77305	0.00328516	-1.799	0.999847	-2.77305	-5.54609	4.7681e-07
rs10131789	0.00508741	1.67181	0.999762	-2.77521	0.00508741	1.67181	0.999762	-2.77521	-5.55043	4.74748e-07
rs1541390	0.00508621	1.67149	0.999762	-2.77587	0.00508621	1.67149	0.999762	-2.77587	-5.55174	4.74126e-07
rs12586230	0.00426985	1.72257	0.999801	-2.77661	0.00426985	1.72257	0.999801	-2.77661	-5.55321	4.73428e-07
rs8021339	0.00508696	1.66576	0.999762	-2.78536	0.00508696	1.66576	0.999762	-2.78536	-5.57071	4.65215e-07
rs10145285	0.00363663	-1.75891	0.99983	-2.79357	0.00363663	-1.75891	0.99983	-2.79357	-5.58714	4.57634e-07
rs2100489	0.00328817	-1.78361	0.999846	-2.80015	0.00328817	-1.78361	0.999846	-2.80015	-5.60029	4.51655e-07
rs242104	0.00380794	-1.73811	0.999822	-2.80693	0.00380794	-1.73811	0.999822	-2.80693	-5.61387	4.45565e-07
rs8015246	0.0051094	1.65024	0.999761	-2.80889	0.0051094	1.65024	0.999761	-2.80889	-5.61779	4.43823e-07
rs8016954	0.00364345	-1.74217	0.99983	-2.82193	0.00364345	-1.74217	0.99983	-2.82193	-5.64386	4.32398e-07
rs436106	0.00379783	-1.72328	0.999823	-2.83391	0.00379783	-1.72328	0.999823	-2.83391	-5.66782	4.22162e-07
rs1468280	0.00328597	1.76122	0.999846	-2.84017	0.00328597	1.76122	0.999846	-2.84017	-5.68034	4.16912e-07
rs10135398	0.00509652	1.63045	0.999762	-2.84259	0.00509652	1.63045	0.999762	-2.84259	-5.68519	4.14894e-07
rs10129720	0.00328757	-1.75819	0.999846	-2.84525	0.00328757	-1.75819	0.999846	-2.84525	-5.6905	4.12697e-07
rs4902683	0.00379201	-1.71692	0.999823	-2.84562	0.00379201	-1.71692	0.999823	-2.84562	-5.69123	4.12394e-07
rs1983700	0.0037885	-1.71049	0.999823	-2.8571	0.0037885	-1.71049	0.999823	-2.8571	-5.71421	4.03027e-07
rs242109	0.0038058	-1.70887	0.999822	-2.8576	0.0038058	-1.70887	0.999822	-2.8576	-5.7152	4.02626e-07
rs1742497	0.00464167	-1.64684	0.999783	-2.86245	0.00464167	-1.64684	0.999783	-2.86245	-5.7249	3.9874e-07
rs761900	0.00362907	-1.71374	0.99983	-2.87302	0.00362907	-1.71374	0.99983	-2.87302	-5.74603	3.90404e-07
rs2842322	0.00384481	-1.68727	0.99982	-2.88916	0.00384481	-1.68727	0.99982	-2.88916	-5.77833	3.77995e-07
rs4902579	0.00425794	-1.64456	0.999801	-2.90932	0.00425794	-1.64456	0.999801	-2.90932	-5.81865	3.63059e-07
rs371379834	0.00467368	-1.61268	0.999782	-2.91467	0.00467368	-1.61268	0.999782	-2.91467	-5.82935	3.59194e-07
rs7153476	0.00328028	-1.7157	0.999847	-2.92015	0.00328028	-1.7157	0.999847	-2.92015	-5.84031	3.55279e-07
rs8007194	0.00328063	-1.71287	0.999847	-2.92495	0.00328063	-1.71287	0.999847	-2.92495	-5.84991	3.51885e-07
rs11376788	0.00467794	-1.60493	0.999781	-2.92669	0.00467794	-1.60493	0.999781	-2.92669	-5.85338	3.50665e-07
rs10142144	0.00330628	-1.70537	0.999846	-2.93388	0.00330628	-1.70537	0.999846	-2.93388	-5.86777	3.45656e-07
rs10137547	0.00464063	-1.60049	0.999783	-2.9378	0.00464063	-1.60049	0.999783	-2.9378	-5.87561	3.42957e-07
rs2012785	0.00464155	-1.59254	0.999783	-2.9504	0.00464155	-1.59254	0.999783	-2.9504	-5.90079	3.34427e-07
rs34759485	0.00331455	-1.69099	0.999845	-2.95704	0.00331455	-1.69099	0.999845	-2.95704	-5.91408	3.30011e-07
rs2012764	0.00464231	-1.58732	0.999783	-2.95862	0.00464231	-1.58732	0.999783	-2.95862	-5.91724	3.28973e-07
rs556169981	0.00415317	-1.61631	0.999806	-2.96782	0.00415317	-1.61631	0.999806	-2.96782	-5.93564	3.22973e-07
rs2268983	0.00328059	-1.68362	0.999847	-2.97462	0.00328059	-1.68362	0.999847	-2.97462	-5.94925	3.18609e-07
rs765899	0.00349734	-1.66392	0.999837	-2.97563	0.00349734	-1.66392	0.999837	-2.97563	-5.95125	3.17971e-07
rs11627234	0.00449242	1.58244	0.99979	-2.98274	0.00449242	1.58244	0.99979	-2.98274	-5.96548	3.13479e-07
rs9796392	0.00328788	-1.67403	0.999846	-2.98962	0.00328788	-1.67403	0.999846	-2.98962	-5.97923	3.09197e-07
rs7146181	0.00366233	1.63838	0.999829	-2.99476	0.00366233	1.63838	0.999829	-2.99476	-5.98951	3.06034e-07
rs10151419	0.00382933	-1.62463	0.999821	-2.99489	0.00382933	-1.62463	0.999821	-2.99489	-5.98978	3.05953e-07
rs451676	0.00382029	-1.62402	0.999822	-2.99708	0.00382029	-1.62402	0.999822	-2.99708	-5.99415	3.04618e-07
rs927064	0.00380536	-1.62224	0.999822	-3.00192	0.00380536	-1.62224	0.999822	-3.00192	-6.00384	3.01683e-07
rs8022870	0.00410598	-1.59595	0.999808	-3.00622	0.00410598	-1.59595	0.999808	-3.00622	-6.01244	2.99097e-07
rs10083335	0.00330443	-1.66186	0.999846	-3.00739	0.00330443	-1.66186	0.999846	-3.00739	-6.01478	2.98398e-07
rs8015425	0.00330378	-1.66158	0.999846	-3.00796	0.00330378	-1.66158	0.999846	-3.00796	-6.01591	2.98061e-07
rs743128	0.00365243	-1.62819	0.999829	-3.01274	0.00365243	-1.62819	0.999829	-3.01274	-6.02549	2.9522e-07
rs12435914	0.00384948	-1.61137	0.99982	-3.01373	0.00384948	-1.61137	0.99982	-3.01373	-6.02747	2.94637e-07
rs2074562	0.00383986	1.61085	0.999821	-3.01582	0.00383986	1.61085	0.999821	-3.01582	-6.03163	2.93412e-07
rs2012752	0.00379216	-1.60217	0.999823	-3.036	0.00379216	-1.60217	0.999823	-3.036	-6.072	2.81805e-07
rs34450502	0.00329931	-1.63906	0.999846	-3.04579	0.00329931	-1.63906	0.999846	-3.04579	-6.09159	2.76338e-07
rs10140273	0.00329932	-1.63869	0.999846	-3.0464	0.00329932	-1.63869	0.999846	-3.0464	-6.0928	2.76002e-07
rs28661733	0.00330126	-1.63699	0.999846	-3.04889	0.00330126	-1.63699	0.999846	-3.04889	-6.09777	2.74634e-07
rs8010767	0.00329197	-1.62971	0.999846	-3.06219	0.00329197	-1.62971	0.999846	-3.06219	-6.12438	2.67422e-07
rs4902717	0.00329915	-1.62793	0.999846	-3.06399	0.00329915	-1.62793	0.999846	-3.06399	-6.12799	2.6646e-07
rs12895620	0.00329912	-1.62779	0.999846	-3.06423	0.00329912	-1.62779	0.999846	-3.06423	-6.12847	2.66332e-07
rs7143858	0.00329919	-1.62683	0.999846	-3.06578	0.00329919	-1.62683	0.999846	-3.06578	-6.13155	2.65512e-07
rs28470369	0.00329947	-1.62654	0.999846	-3.06621	0.00329947	-1.62654	0.999846	-3.06621	-6.13241	2.65283e-07
rs11622711	0.00330005	-1.62614	0.999846	-3.06677	0.00330005	-1.62614	0.999846	-3.06677	-6.13355	2.64982e-07
rs2124191	0.00329916	-1.62584	0.999846	-3.0674	0.00329916	-1.62584	0.999846	-3.0674	-6.1348	2.64652e-07
rs56392460	0.00329081	-1.62591	0.999846	-3.06855	0.00329081	-1.62591	0.999846	-3.06855	-6.13711	2.64041e-07
rs28401542	0.00329924	-1.62491	0.999846	-3.0689	0.00329924	-1.62491	0.999846	-3.0689	-6.13781	2.63856e-07
rs1466255	0.00329043	-1.62543	0.999846	-3.06939	0.00329043	-1.62543	0.999846	-3.06939	-6.13877	2.63602e-07
rs12878175	0.00329877	-1.62454	0.999846	-3.06956	0.00329877	-1.62454	0.999846	-3.06956	-6.13913	2.63508e-07
rs1965878	0.00329082	-1.62504	0.999846	-3.06996	0.00329082	-1.62504	0.999846	-3.06996	-6.13991	2.63302e-07
rs10138313	0.00329831	-1.622	0.999846	-3.07376	0.00329831	-1.622	0.999846	-3.07376	-6.14751	2.61308e-07
rs12147967	0.00329344	-1.62212	0.999846	-3.0743	0.00329344	-1.62212	0.999846	-3.0743	-6.1486	2.61025e-07
rs12147478	0.0032938	-1.62098	0.999846	-3.0761	0.0032938	-1.62098	0.999846	-3.0761	-6.15219	2.60088e-07
rs1958121	0.00329838	-1.61835	0.999846	-3.07967	0.00329838	-1.61835	0.999846	-3.07967	-6.15934	2.58236e-07
rs8016781	0.00329823	-1.61782	0.999846	-3.08054	0.00329823	-1.61782	0.999846	-3.08054	-6.16107	2.57788e-07
rs10129186	0.0032984	-1.61758	0.999846	-3.08091	0.0032984	-1.61758	0.999846	-3.08091	-6.16182	2.57597e-07
rs67502261	0.00329824	-1.61755	0.999846	-3.08098	0.00329824	-1.61755	0.999846	-3.08098	-6.16196	2.5756e-07
rs4899295	0.0032986	-1.61746	0.999846	-3.08107	0.0032986	-1.61746	0.999846	-3.08107	-6.16213	2.57515e-07
rs10143593	0.00329829	-1.61726	0.999846	-3.08145	0.00329829	-1.61726	0.999846	-3.08145	-6.1629	2.57318e-07
rs7147362	0.00329831	-1.61723	0.999846	-3.08149	0.00329831	-1.61723	0.999846	-3.08149	-6.16298	2.57298e-07
rs7147710	0.00329831	-1.61723	0.999846	-3.08149	0.00329831	-1.61723	0.999846	-3.08149	-6.16298	2.57298e-07
rs11624577	0.00329831	-1.61722	0.999846	-3.0815	0.00329831	-1.61722	0.999846	-3.0815	-6.163	2.57292e-07
rs34840252	0.00329831	-1.61721	0.999846	-3.08152	0.00329831	-1.61721	0.999846	-3.08152	-6.16304	2.57282e-07
rs3759771	0.00329881	-1.61635	0.999846	-3.08283	0.00329881	-1.61635	0.999846	-3.08283	-6.16566	2.56608e-07
rs2085193	0.00329846	-1.61623	0.999846	-3.08308	0.00329846	-1.61623	0.999846	-3.08308	-6.16617	2.56478e-07
rs8015317	0.00329895	-1.61553	0.999846	-3.08414	0.00329895	-1.61553	0.999846	-3.08414	-6.16828	2.55936e-07
rs959242	0.00330027	-1.59211	0.999846	-3.1215	0.00330027	-1.59211	0.999846	-3.1215	-6.24299	2.37513e-07
rs12893282	0.00329979	-1.59005	0.999846	-3.12483	0.00329979	-1.59005	0.999846	-3.12483	-6.24967	2.35932e-07
rs2296722	0.00329985	-1.58439	0.999846	-3.13382	0.00329985	-1.58439	0.999846	-3.13382	-6.26764	2.3173e-07

## Sheet: INF2
snp	V.df1	z.df1	r.df1	lABF.df1	V.df2	z.df2	r.df2	lABF.df2	internal.sum.lABF	SNP.PP.H4
rs11160822	0.0547485	-4.18676	0.997519	5.74317	0.0547485	-4.18676	0.997519	5.74317	11.4863	0.9918
rs192209166	0.176377	3.2575	0.992052	2.84607	0.176377	3.2575	0.992052	2.84607	5.69213	0.00302019
rs111784435	0.0401626	-3.23588	0.998179	2.07176	0.0401626	-3.23588	0.998179	2.07176	4.14352	0.000641922
rs556317504	0.0254425	-3.28552	0.998846	2.00899	0.0254425	-3.28552	0.998846	2.00899	4.01798	0.000566186
rs202233797	2.98512	2.60925	0.880592	1.93502	2.98512	2.60925	0.880592	1.93502	3.87005	0.000488328
rs373094379	11.8913	2.73604	0.649281	1.90634	11.8913	2.73604	0.649281	1.90634	3.81268	0.000461102
rs201557978	1.81085	2.47352	0.923994	1.53817	1.81085	2.47352	0.923994	1.53817	3.07634	0.000220806
rs61997111	0.0179177	-3.08649	0.999187	1.20209	0.0179177	-3.08649	0.999187	1.20209	2.40419	0.000112745
rs200139025	2.21135	2.29509	0.908719	1.1964	2.21135	2.29509	0.908719	1.1964	2.39279	0.000111468
rs10150221	0.0130291	-3.09086	0.999409	1.05745	0.0130291	-3.09086	0.999409	1.05745	2.1149	8.44231e-05
rs551536286	2.55265	2.18999	0.896094	1.01672	2.55265	2.18999	0.896094	1.01672	2.03343	7.78179e-05
rs144360641	28.242	2.43709	0.43804	1.01269	28.242	2.43709	0.43804	1.01269	2.02538	7.71943e-05
rs372211442	0.217772	-2.57757	0.990205	0.976479	0.217772	-2.57757	0.990205	0.976479	1.95296	7.18011e-05
rs200272722	9.93075	2.11562	0.68913	0.958033	9.93075	2.11562	0.68913	0.958033	1.91607	6.92005e-05
rs78007131	0.0122815	-3.06464	0.999442	0.947422	0.0122815	-3.06464	0.999442	0.947422	1.89484	6.77473e-05
rs115845341	22.5384	2.28272	0.494118	0.946647	22.5384	2.28272	0.494118	0.946647	1.89329	6.76424e-05
rs374805591	1.17185	2.26639	0.949459	0.945969	1.17185	2.26639	0.949459	0.945969	1.89194	6.75508e-05
rs553612773	0.131807	2.65598	0.994048	0.944097	0.131807	2.65598	0.994048	0.944097	1.88819	6.72983e-05
rs191644242	0.178694	-2.57368	0.991948	0.874312	0.178694	-2.57368	0.991948	0.874312	1.74862	5.85316e-05
rs559368298	24.5061	2.23562	0.473218	0.862082	24.5061	2.23562	0.473218	0.862082	1.72416	5.71172e-05
rs532445437	11.721	2.03627	0.652559	0.824302	11.721	2.03627	0.652559	0.824302	1.6486	5.29605e-05
rs551040167	56.887	2.6003	0.27901	0.77971	56.887	2.6003	0.27901	0.77971	1.55942	4.84417e-05
rs376661887	4.97161	1.96891	0.81577	0.735418	4.97161	1.96891	0.81577	0.735418	1.47084	4.43352e-05
rs144232454	0.0979928	2.62667	0.995568	0.7249	0.0979928	2.62667	0.995568	0.7249	1.4498	4.34123e-05
rs147680795	0.118174	-2.59032	0.994661	0.720645	0.118174	-2.59032	0.994661	0.720645	1.44129	4.30444e-05
rs201724743	5.27079	1.93892	0.806825	0.694513	5.27079	1.93892	0.806825	0.694513	1.38903	4.08525e-05
rs368948918	2.92916	1.99101	0.882568	0.678352	2.92916	1.99101	0.882568	0.678352	1.3567	3.95532e-05
rs773770243	34.6163	2.1601	0.388735	0.660816	34.6163	2.1601	0.388735	0.660816	1.32163	3.819e-05
rs201652306	0.434143	2.28448	0.98066	0.58615	0.434143	2.28448	0.98066	0.58615	1.1723	3.28924e-05
rs554565193	4.51193	1.87159	0.829907	0.567815	4.51193	1.87159	0.829907	0.567815	1.13563	3.17081e-05
rs148890906	19.2653	1.87203	0.533297	0.553437	19.2653	1.87203	0.533297	0.553437	1.10687	3.08093e-05
rs192764647	20.2034	1.8463	0.521447	0.520265	20.2034	1.8463	0.521447	0.520265	1.04053	2.88316e-05
rs72707623	0.0489458	-2.67473	0.997782	0.513675	0.0489458	-2.67473	0.997782	0.513675	1.02735	2.84541e-05
rs199757955	35.2793	1.97096	0.384236	0.503873	35.2793	1.97096	0.384236	0.503873	1.00775	2.79017e-05
rs183309280	0.176893	-2.42145	0.992029	0.492387	0.176893	-2.42145	0.992029	0.492387	0.984774	2.72681e-05
rs370128922	16.2279	1.78239	0.575654	0.485803	16.2279	1.78239	0.575654	0.485803	0.971606	2.69113e-05
rs189899128	0.190086	-2.40445	0.991439	0.485651	0.190086	-2.40445	0.991439	0.485651	0.971303	2.69032e-05
rs575000840	0.212142	-2.38182	0.990455	0.483569	0.212142	-2.38182	0.990455	0.483569	0.967139	2.67914e-05
rs148003494	0.101255	2.52495	0.995422	0.479893	0.101255	2.52495	0.995422	0.479893	0.959787	2.65951e-05
rs138726959	0.137047	2.46329	0.993813	0.472463	0.137047	2.46329	0.993813	0.472463	0.944925	2.62028e-05
rs757755740	2.97531	1.86726	0.880938	0.471705	2.97531	1.86726	0.880938	0.471705	0.943411	2.61632e-05
rs376067427	10.6381	1.74405	0.674201	0.464628	10.6381	1.74405	0.674201	0.464628	0.929256	2.57954e-05
rs116927691	1.13127	2.03536	0.951124	0.460875	1.13127	2.03536	0.951124	0.460875	0.92175	2.56025e-05
rs182566229	19.1091	1.765	0.535323	0.450619	19.1091	1.765	0.535323	0.450619	0.901238	2.50827e-05
rs112183935	23.0268	1.71382	0.48876	0.382332	23.0268	1.71382	0.48876	0.382332	0.764663	2.18807e-05
rs746667671	18.8354	1.68926	0.538909	0.381834	18.8354	1.68926	0.538909	0.381834	0.763669	2.18589e-05
rs201012061	0.0231588	-2.75961	0.998949	0.37467	0.0231588	-2.75961	0.998949	0.37467	0.749339	2.1548e-05
rs113252411	10.6315	1.65956	0.674337	0.367659	10.6315	1.65956	0.674337	0.367659	0.735318	2.12479e-05
rs533796572	0.137745	2.41006	0.993782	0.345985	0.137745	2.41006	0.993782	0.345985	0.69197	2.03466e-05
rs377340315	3.2051	1.76458	0.872911	0.327583	3.2051	1.76458	0.872911	0.327583	0.655165	1.96113e-05
rs78543489	0.0474164	-2.59915	0.997851	0.299219	0.0474164	-2.59915	0.997851	0.299219	0.598438	1.85298e-05
rs563659098	12.2308	1.58533	0.642846	0.293028	12.2308	1.58533	0.642846	0.293028	0.586055	1.83018e-05
rs573718762	43.1334	1.69278	0.337914	0.277967	43.1334	1.69278	0.337914	0.277967	0.555933	1.77587e-05
rs537509594	77.0938	1.89515	0.222124	0.273295	77.0938	1.89515	0.222124	0.273295	0.54659	1.75935e-05
rs117539607	0.0266947	-2.69502	0.998789	0.269073	0.0266947	-2.69502	0.998789	0.269073	0.538147	1.74456e-05
rs199868464	61.6253	1.7768	0.263204	0.262748	61.6253	1.7768	0.263204	0.262748	0.525496	1.72263e-05
rs375550242	4.95699	1.64654	0.816212	0.25943	4.95699	1.64654	0.816212	0.25943	0.518859	1.71124e-05
rs17852251	0.0972592	2.43864	0.995601	0.247173	0.0972592	2.43864	0.995601	0.247173	0.494347	1.6698e-05
rs141696479	0.106493	2.40878	0.995186	0.219046	0.106493	2.40878	0.995186	0.219046	0.438092	1.57846e-05
rs756931995	75.718	1.72902	0.225251	0.209089	75.718	1.72902	0.225251	0.209089	0.418177	1.54733e-05
rs200450338	1.84903	1.78644	0.922516	0.193211	1.84903	1.78644	0.922516	0.193211	0.386422	1.49897e-05
rs117582307	0.142293	-2.32378	0.993578	0.15864	0.142293	-2.32378	0.993578	0.15864	0.317279	1.39883e-05
rs146231864	0.137112	-2.32851	0.99381	0.151778	0.137112	-2.32851	0.99381	0.151778	0.303557	1.37977e-05
rs199801767	133.354	1.77072	0.141691	0.145737	133.354	1.77072	0.141691	0.145737	0.291474	1.36319e-05
rs537685812	79.5288	1.56122	0.216797	0.14203	79.5288	1.56122	0.216797	0.14203	0.284061	1.35313e-05
rs551576506	0.0289252	-2.63192	0.998688	0.14093	0.0289252	-2.63192	0.998688	0.14093	0.281861	1.35015e-05
rs201180682	5.2529	1.53506	0.807355	0.12778	5.2529	1.53506	0.807355	0.12778	0.25556	1.3151e-05
rs144094235	0.127508	2.31696	0.994241	0.0901806	0.127508	2.31696	0.994241	0.0901806	0.180361	1.21984e-05
rs538498962	1.46354	1.76812	0.937663	0.0780875	1.46354	1.76812	0.937663	0.0780875	0.156175	1.19069e-05
rs557323458	0.203136	2.2113	0.990857	0.0751955	0.203136	2.2113	0.990857	0.0751955	0.150391	1.18382e-05
rs544154556	380.476	1.87713	0.0546951	0.0682383	380.476	1.87713	0.0546951	0.0682383	0.136477	1.16746e-05
rs563828047	380.476	1.87713	0.0546951	0.0682383	380.476	1.87713	0.0546951	0.0682383	0.136477	1.16746e-05
rs587772315	440.223	1.9035	0.0476254	0.0618821	440.223	1.9035	0.0476254	0.0618821	0.123764	1.15272e-05
rs199937815	0.0170068	-2.6966	0.999228	0.0497237	0.0170068	-2.6966	0.999228	0.0497237	0.0994474	1.12502e-05
rs201948776	0.0170065	-2.69647	0.999228	0.0493586	0.0170065	-2.69647	0.999228	0.0493586	0.0987171	1.1242e-05
rs185343487	1.54741	1.73588	0.934325	0.0461748	1.54741	1.73588	0.934325	0.0461748	0.0923496	1.11707e-05
rs143515877	540.735	1.73577	0.0391192	0.0389784	540.735	1.73577	0.0391192	0.0389784	0.0779567	1.1011e-05
rs3803320	432.898	1.552	0.0483924	0.0334801	432.898	1.552	0.0483924	0.0334801	0.0669602	1.08906e-05
rs145224573	0.0920679	2.34825	0.995835	0.0051062	0.0920679	2.34825	0.995835	0.0051062	0.0102124	1.02898e-05
rs201328766	1.57001	1.70348	0.93343	-0.000416159	1.57001	1.70348	0.93343	-0.000416159	-0.000832319	1.01768e-05
rs201110721	0.0231055	-2.61762	0.998952	-0.00782512	0.0231055	-2.61762	0.998952	-0.00782512	-0.0156502	1.00271e-05
rs181385226	2.20175	1.57035	0.909079	-0.0779894	2.20175	1.57035	0.909079	-0.0779894	-0.155979	8.71428e-06
rs531942140	1.3993	1.68128	0.940236	-0.0797886	1.3993	1.68128	0.940236	-0.0797886	-0.159577	8.68298e-06
rs2735798	0.0311678	-2.52188	0.998586	-0.105291	0.0311678	-2.52188	0.998586	-0.105291	-0.210583	8.2512e-06
rs150715961	0.127252	2.2256	0.994253	-0.117112	0.127252	2.2256	0.994253	-0.117112	-0.234225	8.05842e-06
rs149073034	1.09814	1.70972	0.952487	-0.131249	1.09814	1.70972	0.952487	-0.131249	-0.262499	7.83376e-06
rs4983573	0.0131611	2.67644	0.999403	-0.131852	0.0131611	2.67644	0.999403	-0.131852	-0.263704	7.82433e-06
rs151079485	0.10856	2.25165	0.995093	-0.136006	0.10856	2.25165	0.995093	-0.136006	-0.272012	7.7596e-06
rs74195408	0.0104297	-2.71588	0.999526	-0.141374	0.0104297	-2.71588	0.999526	-0.141374	-0.282747	7.67674e-06
rs200895321	1.6726	1.58551	0.929387	-0.15711	1.6726	1.58551	0.929387	-0.15711	-0.31422	7.43889e-06
rs371549146	0.0186347	-2.60118	0.999154	-0.157416	0.0186347	-2.60118	0.999154	-0.157416	-0.314832	7.43434e-06
rs10145467	0.123239	2.20017	0.994433	-0.188543	0.123239	2.20017	0.994433	-0.188543	-0.377085	6.98564e-06
rs143698218	0.102871	-2.22498	0.995349	-0.221561	0.102871	-2.22498	0.995349	-0.221561	-0.443122	6.53923e-06
rs4983572	0.0131951	2.63875	0.999401	-0.230689	0.0131951	2.63875	0.999401	-0.230689	-0.461378	6.42094e-06
rs35156277	0.0120683	2.64093	0.999452	-0.26936	0.0120683	2.64093	0.999452	-0.26936	-0.538719	5.94305e-06
rs150802577	0.0893633	2.23274	0.995957	-0.272904	0.0893633	2.23274	0.995957	-0.272904	-0.545808	5.90107e-06
rs189870546	0.112846	2.17993	0.9949	-0.275333	0.112846	2.17993	0.9949	-0.275333	-0.550666	5.87247e-06
rs587724650	0.209294	2.02656	0.990582	-0.29844	0.209294	2.02656	0.990582	-0.29844	-0.596881	5.60725e-06
rs182604884	0.0106135	-2.64381	0.999518	-0.325707	0.0106135	-2.64381	0.999518	-0.325707	-0.651415	5.30966e-06
rs150114912	0.134641	2.11154	0.993921	-0.33571	0.134641	2.11154	0.993921	-0.33571	-0.67142	5.20449e-06
rs188012703	0.0669847	2.26757	0.996966	-0.33588	0.0669847	2.26757	0.996966	-0.33588	-0.67176	5.20272e-06
rs184650761	0.247525	1.94586	0.988881	-0.377431	0.247525	1.94586	0.988881	-0.377431	-0.754862	4.78784e-06
rs11160826	0.0917187	-2.17676	0.995851	-0.383133	0.0917187	-2.17676	0.995851	-0.383133	-0.766266	4.73355e-06
rs117027509	0.0653978	2.24536	0.997038	-0.397615	0.0653978	2.24536	0.997038	-0.397615	-0.795231	4.59841e-06
rs200601510	0.0184979	-2.50737	0.99916	-0.400499	0.0184979	-2.50737	0.99916	-0.400499	-0.800998	4.57197e-06
rs587644132	0.142769	2.0652	0.993556	-0.403555	0.142769	2.0652	0.993556	-0.403555	-0.807109	4.54411e-06
rs587754712	0.132919	2.07938	0.993998	-0.408923	0.132919	2.07938	0.993998	-0.408923	-0.817846	4.49558e-06
rs182868270	0.389912	1.80802	0.982596	-0.419519	0.389912	1.80802	0.982596	-0.419519	-0.839038	4.40131e-06
rs142668345	0.0612379	-2.24636	0.997226	-0.427652	0.0612379	-2.24636	0.997226	-0.427652	-0.855304	4.33031e-06
rs8015606	0.131959	2.0716	0.994041	-0.428479	0.131959	2.0716	0.994041	-0.428479	-0.856958	4.32315e-06
rs531108529	0.149467	2.03306	0.993256	-0.446835	0.149467	2.03306	0.993256	-0.446835	-0.89367	4.16732e-06
rs191587875	0.142826	2.04119	0.993554	-0.452348	0.142826	2.04119	0.993554	-0.452348	-0.904695	4.12162e-06
rs533348168	0.0131222	-2.54721	0.999404	-0.470663	0.0131222	-2.54721	0.999404	-0.470663	-0.941326	3.97337e-06
rs549595505	0.067754	2.2033	0.996932	-0.473501	0.067754	2.2033	0.996932	-0.473501	-0.947003	3.95088e-06
rs146037139	0.235754	1.90483	0.989404	-0.478695	0.235754	1.90483	0.989404	-0.478695	-0.957391	3.91005e-06
rs7147744	0.0145359	-2.52377	0.99934	-0.479143	0.0145359	-2.52377	0.99934	-0.479143	-0.958285	3.90656e-06
rs4983571	0.0120817	2.55381	0.999451	-0.494969	0.0120817	2.55381	0.999451	-0.494969	-0.989937	3.78484e-06
rs4983570	0.0120813	2.55375	0.999452	-0.495147	0.0120813	2.55375	0.999452	-0.495147	-0.990294	3.78349e-06
rs185170684	0.111571	2.07461	0.994957	-0.503764	0.111571	2.07461	0.994957	-0.503764	-1.00753	3.71885e-06
rs4983574	0.0120811	2.54877	0.999452	-0.507856	0.0120811	2.54877	0.999452	-0.507856	-1.01571	3.68854e-06
rs185623099	0.414585	1.73299	0.981516	-0.521549	0.414585	1.73299	0.981516	-0.521549	-1.0431	3.58889e-06
rs34726969	0.0120334	2.52006	0.999454	-0.582536	0.0120334	2.52006	0.999454	-0.582536	-1.16507	3.17678e-06
rs117581989	0.0885622	2.08934	0.995993	-0.585953	0.0885622	2.08934	0.995993	-0.585953	-1.17191	3.15515e-06
rs368608111	0.121375	2.00492	0.994517	-0.604199	0.121375	2.00492	0.994517	-0.604199	-1.2084	3.04209e-06
rs45440496	0.0833373	2.09167	0.996229	-0.610876	0.0833373	2.09167	0.996229	-0.610876	-1.22175	3.00173e-06
rs60503057	0.0833286	2.08664	0.996229	-0.6214	0.0833286	2.08664	0.996229	-0.6214	-1.2428	2.93921e-06
rs56118171	0.0110923	-2.52063	0.999496	-0.621655	0.0110923	-2.52063	0.999496	-0.621655	-1.24331	2.93771e-06
rs142241633	0.134343	1.96613	0.993934	-0.631451	0.134343	1.96613	0.993934	-0.631451	-1.2629	2.88072e-06
rs557689648	0.21061	1.84636	0.990524	-0.641113	0.21061	1.84636	0.990524	-0.641113	-1.28223	2.82558e-06
rs12884142	0.00468046	-2.67586	0.999787	-0.648779	0.00468046	-2.67586	0.999787	-0.648779	-1.29756	2.78259e-06
rs138430941	0.128188	1.96783	0.994211	-0.650902	0.128188	1.96783	0.994211	-0.650902	-1.3018	2.7708e-06
rs56750078	0.0826724	2.07203	0.996259	-0.655537	0.0826724	2.07203	0.996259	-0.655537	-1.31107	2.74524e-06
rs547528877	0.0108975	-2.5064	0.999505	-0.666229	0.0108975	-2.5064	0.999505	-0.666229	-1.33246	2.68716e-06
rs150225323	0.171293	1.88365	0.992279	-0.671541	0.171293	1.88365	0.992279	-0.671541	-1.34308	2.65876e-06
rs111712356	0.0410135	-2.22554	0.99814	-0.671804	0.0410135	-2.22554	0.99814	-0.671804	-1.34361	2.65736e-06
rs75849183	0.128506	1.95514	0.994196	-0.674453	0.128506	1.95514	0.994196	-0.674453	-1.34891	2.64332e-06
rs148480421	0.258738	-1.76657	0.988383	-0.685392	0.258738	-1.76657	0.988383	-0.685392	-1.37078	2.58612e-06
rs75514678	0.128259	1.94973	0.994208	-0.685885	0.128259	1.94973	0.994208	-0.685885	-1.37177	2.58357e-06
rs78689542	0.133955	1.9316	0.993952	-0.699748	0.133955	1.9316	0.993952	-0.699748	-1.3995	2.51292e-06
rs144645678	0.143691	-1.9128	0.993515	-0.701597	0.143691	-1.9128	0.993515	-0.701597	-1.40319	2.50364e-06
rs75937238	0.146602	1.90762	0.993385	-0.701717	0.146602	1.90762	0.993385	-0.701717	-1.40343	2.50305e-06
rs75577107	0.128257	1.93924	0.994208	-0.70618	0.128257	1.93924	0.994208	-0.70618	-1.41236	2.4808e-06
rs75573399	0.0153279	-2.41313	0.999304	-0.72566	0.0153279	-2.41313	0.999304	-0.72566	-1.45132	2.38601e-06
rs76031125	0.0143971	-2.4253	0.999346	-0.727416	0.0143971	-2.4253	0.999346	-0.727416	-1.45483	2.37764e-06
rs540446921	0.120731	1.94195	0.994546	-0.73037	0.120731	1.94195	0.994546	-0.73037	-1.46074	2.36364e-06
rs115882282	0.128285	1.92263	0.994206	-0.737953	0.128285	1.92263	0.994206	-0.737953	-1.47591	2.32806e-06
rs151159048	0.188839	-1.81894	0.991495	-0.743346	0.188839	-1.81894	0.991495	-0.743346	-1.48669	2.30308e-06
rs115110116	0.120841	1.93365	0.994541	-0.745923	0.120841	1.93365	0.994541	-0.745923	-1.49185	2.29125e-06
rs538763262	0.153241	1.8723	0.993087	-0.746542	0.153241	1.8723	0.993087	-0.746542	-1.49308	2.28841e-06
rs146519657	0.082037	2.02783	0.996287	-0.749578	0.082037	2.02783	0.996287	-0.749578	-1.49916	2.27456e-06
rs114035213	0.120754	1.93137	0.994545	-0.750667	0.120754	1.93137	0.994545	-0.750667	-1.50133	2.26961e-06
rs74090195	0.0819843	2.02665	0.99629	-0.752287	0.0819843	2.02665	0.99629	-0.752287	-1.50457	2.26227e-06
rs61997122	0.157084	1.86267	0.992915	-0.752409	0.157084	1.86267	0.992915	-0.752409	-1.50482	2.26172e-06
rs77422581	0.014417	-2.41356	0.999346	-0.755126	0.014417	-2.41356	0.999346	-0.755126	-1.51025	2.24946e-06
rs45619941	0.0820032	2.02421	0.996289	-0.757092	0.0820032	2.02421	0.996289	-0.757092	-1.51418	2.24063e-06
rs2735799	0.0331597	-2.23409	0.998496	-0.757987	0.0331597	-2.23409	0.998496	-0.757987	-1.51597	2.23663e-06
rs73352134	0.119647	1.92696	0.994594	-0.763618	0.119647	1.92696	0.994594	-0.763618	-1.52724	2.21158e-06
rs150065796	0.170833	1.83439	0.9923	-0.763705	0.170833	1.83439	0.9923	-0.763705	-1.52741	2.21119e-06
rs73352131	0.119618	1.92493	0.994596	-0.767621	0.119618	1.92493	0.994596	-0.767621	-1.53524	2.19394e-06
rs548899578	0.422362	-1.57563	0.981175	-0.768362	0.422362	-1.57563	0.981175	-0.768362	-1.53672	2.19069e-06
rs77889680	0.129278	1.89879	0.994162	-0.779488	0.129278	1.89879	0.994162	-0.779488	-1.55898	2.14248e-06
rs28645411	0.0639392	2.06966	0.997104	-0.786658	0.0639392	2.06966	0.997104	-0.786658	-1.57332	2.11198e-06
rs587742780	0.124775	-1.8957	0.994364	-0.802573	0.124775	-1.8957	0.994364	-0.802573	-1.60515	2.04581e-06
rs143157819	0.11403	1.91471	0.994847	-0.810456	0.11403	1.91471	0.994847	-0.810456	-1.62091	2.01381e-06
rs74088106	0.0802368	2.00147	0.996368	-0.813387	0.0802368	2.00147	0.996368	-0.813387	-1.62677	2.00204e-06
rs146397767	0.135833	-1.85405	0.993868	-0.838873	0.135833	-1.85405	0.993868	-0.838873	-1.67775	1.90255e-06
rs116837208	0.128681	1.86466	0.994189	-0.845593	0.128681	1.86466	0.994189	-0.845593	-1.69119	1.87715e-06
rs79532723	0.128112	1.859	0.994214	-0.858233	0.128112	1.859	0.994214	-0.858233	-1.71647	1.83029e-06
rs201323100	0.369803	-1.54657	0.983479	-0.875391	0.369803	-1.54657	0.983479	-0.875391	-1.75078	1.76855e-06
rs139443923	0.0926941	1.93069	0.995807	-0.881199	0.0926941	1.93069	0.995807	-0.881199	-1.7624	1.74813e-06
rs4983397	0.0830339	1.95674	0.996242	-0.884762	0.0830339	1.95674	0.996242	-0.884762	-1.76952	1.73571e-06
rs142493675	0.117887	-1.86605	0.994673	-0.885736	0.117887	-1.86605	0.994673	-0.885736	-1.77147	1.73234e-06
rs192176302	0.173451	-1.75766	0.992183	-0.893099	0.173451	-1.75766	0.992183	-0.893099	-1.7862	1.70701e-06
rs137917205	0.128495	1.83435	0.994197	-0.90203	0.128495	1.83435	0.994197	-0.90203	-1.80406	1.67679e-06
rs556925201	0.124132	-1.84151	0.994393	-0.90579	0.124132	-1.84151	0.994393	-0.90579	-1.81158	1.66423e-06
rs200248340	0.263904	1.62897	0.988154	-0.90683	0.263904	1.62897	0.988154	-0.90683	-1.81366	1.66077e-06
rs115601034	0.12017	1.84245	0.994571	-0.919904	0.12017	1.84245	0.994571	-0.919904	-1.83981	1.61791e-06
rs548408774	0.174198	-1.74101	0.992149	-0.919915	0.174198	-1.74101	0.992149	-0.919915	-1.83983	1.61787e-06
rs75896819	0.120153	1.83921	0.994572	-0.925897	0.120153	1.83921	0.994572	-0.925897	-1.85179	1.59863e-06
rs114094348	0.120183	1.8387	0.99457	-0.926705	0.120183	1.8387	0.99457	-0.926705	-1.85341	1.59605e-06
rs112696701	0.081371	-1.93423	0.996317	-0.938329	0.081371	-1.93423	0.996317	-0.938329	-1.87666	1.55937e-06
rs528255211	0.0873539	-1.90982	0.996048	-0.950219	0.0873539	-1.90982	0.996048	-0.950219	-1.90044	1.52273e-06
rs10143028	0.064382	1.98102	0.997084	-0.962269	0.064382	1.98102	0.997084	-0.962269	-1.92454	1.48647e-06
rs3803321	0.083234	1.91497	0.996233	-0.964137	0.083234	1.91497	0.996233	-0.964137	-1.92827	1.48092e-06
rs139704261	0.124596	1.80728	0.994372	-0.966072	0.124596	1.80728	0.994372	-0.966072	-1.93214	1.47521e-06
rs45528944	0.0846548	1.90724	0.996169	-0.970543	0.0846548	1.90724	0.996169	-0.970543	-1.94109	1.46207e-06
rs117631636	0.146619	-1.75977	0.993384	-0.970971	0.146619	-1.75977	0.993384	-0.970971	-1.94194	1.46082e-06
rs75544465	0.0306296	2.15348	0.998611	-0.973919	0.0306296	2.15348	0.998611	-0.973919	-1.94784	1.45223e-06
rs74687498	0.0155169	-2.30478	0.999296	-0.974966	0.0155169	-2.30478	0.999296	-0.974966	-1.94993	1.4492e-06
rs372479427	0.0176821	-2.27284	0.999197	-0.983014	0.0176821	-2.27284	0.999197	-0.983014	-1.96603	1.42606e-06
rs7155043	0.084078	1.89455	0.996195	-0.997922	0.084078	1.89455	0.996195	-0.997922	-1.99584	1.38417e-06
rs12050098	0.0839191	1.89317	0.996202	-1.00146	0.0839191	1.89317	0.996202	-1.00146	-2.00292	1.3744e-06
rs138475872	0.130142	1.77264	0.994123	-1.00647	0.130142	1.77264	0.994123	-1.00647	-2.01294	1.3607e-06
rs138147233	0.16273	-1.70832	0.992662	-1.00889	0.16273	-1.70832	0.992662	-1.00889	-2.01778	1.35413e-06
rs11625416	0.0152834	2.29315	0.999306	-1.00924	0.0152834	2.29315	0.999306	-1.00924	-2.01848	1.35318e-06
rs187431124	0.122585	-1.78082	0.994462	-1.02122	0.122585	-1.78082	0.994462	-1.02122	-2.04243	1.32116e-06
rs59766306	0.0720064	-1.9221	0.99674	-1.02177	0.0720064	-1.9221	0.99674	-1.02177	-2.04354	1.3197e-06
rs114864178	0.0823512	1.88493	0.996273	-1.02624	0.0823512	1.88493	0.996273	-1.02624	-2.05247	1.30796e-06
rs188954909	0.0917672	-1.85228	0.995849	-1.03382	0.0917672	-1.85228	0.995849	-1.03382	-2.06764	1.28827e-06
rs28806230	0.123675	1.76948	0.994413	-1.03692	0.123675	1.76948	0.994413	-1.03692	-2.07383	1.28032e-06
rs765109803	0.179472	-1.66245	0.991913	-1.03808	0.179472	-1.66245	0.991913	-1.03808	-2.07617	1.27734e-06
rs10148026	0.00406929	-2.55186	0.999815	-1.04268	0.00406929	-2.55186	0.999815	-1.04268	-2.08535	1.26565e-06
rs144909913	0.124833	1.75875	0.994361	-1.05119	0.124833	1.75875	0.994361	-1.05119	-2.10238	1.24429e-06
rs75452303	0.202982	1.61158	0.990864	-1.06102	0.202982	1.61158	0.990864	-1.06102	-2.12203	1.22007e-06
rs189463180	0.159974	1.68161	0.992786	-1.06214	0.159974	1.68161	0.992786	-1.06214	-2.12427	1.21734e-06
rs146883120	0.124008	-1.75355	0.994399	-1.0635	0.124008	-1.75355	0.994399	-1.0635	-2.12699	1.21404e-06
rs141272886	0.0960988	1.82065	0.995654	-1.06904	0.0960988	1.82065	0.995654	-1.06904	-2.13808	1.20065e-06
rs75951245	0.124943	1.73868	0.994356	-1.08565	0.124943	1.73868	0.994356	-1.08565	-2.1713	1.16141e-06
rs138175869	0.122912	1.74144	0.994448	-1.08889	0.122912	1.74144	0.994448	-1.08889	-2.17777	1.15393e-06
rs587756860	0.161386	1.66034	0.992722	-1.09314	0.161386	1.66034	0.992722	-1.09314	-2.18629	1.14414e-06
rs113768743	0.0645663	1.91283	0.997076	-1.09323	0.0645663	1.91283	0.997076	-1.09323	-2.18645	1.14395e-06
rs12885890	0.0670546	1.90249	0.996963	-1.09424	0.0670546	1.90249	0.996963	-1.09424	-2.18849	1.14163e-06
rs200955333	0.043361	2.01123	0.998034	-1.09738	0.043361	2.01123	0.998034	-1.09738	-2.19477	1.13448e-06
rs2819427	0.0108987	-2.32585	0.999505	-1.10219	0.0108987	-2.32585	0.999505	-1.10219	-2.20438	1.12362e-06
rs143288785	0.134574	1.69856	0.993924	-1.11793	0.134574	1.69856	0.993924	-1.11793	-2.23586	1.08881e-06
rs150789303	0.0582069	1.92262	0.997363	-1.12568	0.0582069	1.92262	0.997363	-1.12568	-2.25137	1.07205e-06
rs563126683	0.200871	1.56301	0.990958	-1.14249	0.200871	1.56301	0.990958	-1.14249	-2.28497	1.03662e-06
rs116870977	0.107088	-1.74718	0.995159	-1.1464	0.107088	-1.74718	0.995159	-1.1464	-2.2928	1.02854e-06
rs145286303	0.0897248	1.79552	0.995941	-1.14798	0.0897248	1.79552	0.995941	-1.14798	-2.29596	1.0253e-06
rs148582976	0.10249	1.75531	0.995366	-1.15375	0.10249	1.75531	0.995366	-1.15375	-2.30749	1.01354e-06
rs567318565	0.103126	-1.75345	0.995337	-1.15396	0.103126	-1.75345	0.995337	-1.15396	-2.30792	1.01311e-06
rs117779660	0.0837981	1.80991	0.996208	-1.15575	0.0837981	1.80991	0.996208	-1.15575	-2.31149	1.00949e-06
rs143189615	0.0523458	1.93252	0.997628	-1.1591	0.0523458	1.93252	0.997628	-1.1591	-2.31819	1.00275e-06
rs190391590	0.118518	1.70894	0.994645	-1.16246	0.118518	1.70894	0.994645	-1.16246	-2.32491	9.96037e-07
rs77372704	0.203144	-1.54381	0.990857	-1.16658	0.203144	-1.54381	0.990857	-1.16658	-2.33315	9.87861e-07
rs60720598	0.0651184	1.87165	0.997051	-1.16673	0.0651184	1.87165	0.997051	-1.16673	-2.33347	9.8755e-07
rs141327378	0.0674566	1.85843	0.996945	-1.17391	0.0674566	1.85843	0.996945	-1.17391	-2.34782	9.73477e-07
rs141917244	0.123651	1.67265	0.994415	-1.20274	0.123651	1.67265	0.994415	-1.20274	-2.40547	9.18945e-07
rs555701585	0.0205343	-2.13644	0.999068	-1.20909	0.0205343	-2.13644	0.999068	-1.20909	-2.41818	9.07343e-07
rs139465022	0.0558037	-1.87882	0.997472	-1.22954	0.0558037	-1.87882	0.997472	-1.22954	-2.45908	8.70977e-07
rs79697519	0.0763666	-1.7751	0.996543	-1.26364	0.0763666	-1.7751	0.996543	-1.26364	-2.52728	8.1356e-07
rs192195907	0.0812153	1.74347	0.996324	-1.28876	0.0812153	1.74347	0.996324	-1.28876	-2.57753	7.7369e-07
rs570817604	0.151624	-1.55439	0.99316	-1.29265	0.151624	-1.55439	0.99316	-1.29265	-2.58529	7.67703e-07
rs199604161	0.0205742	-2.09093	0.999066	-1.30421	0.0205742	-2.09093	0.999066	-1.30421	-2.60843	7.50146e-07
rs145786710	0.161554	1.52541	0.992715	-1.30599	0.161554	1.52541	0.992715	-1.30599	-2.61199	7.47481e-07
rs561479682	0.0509703	1.86171	0.99769	-1.30629	0.0509703	1.86171	0.99769	-1.30629	-2.61257	7.47045e-07
rs11626524	0.00815263	-2.29666	0.99963	-1.31439	0.00815263	-2.29666	0.99963	-1.31439	-2.62877	7.35041e-07
rs537459649	0.148482	1.53932	0.9933	-1.32604	0.148482	1.53932	0.9933	-1.32604	-2.65208	7.18104e-07
rs148636133	0.0686005	1.76634	0.996893	-1.332	0.0686005	1.76634	0.996893	-1.332	-2.664	7.09597e-07
rs117528462	0.015738	-2.14075	0.999286	-1.33228	0.015738	-2.14075	0.999286	-1.33228	-2.66456	7.09202e-07
rs117941538	0.0759989	-1.73205	0.99656	-1.34125	0.0759989	-1.73205	0.99656	-1.34125	-2.68251	6.96585e-07
rs147715113	0.0329702	1.95357	0.998505	-1.3473	0.0329702	1.95357	0.998505	-1.3473	-2.6946	6.88214e-07
rs76368737	0.0193471	-2.07082	0.999122	-1.37663	0.0193471	-2.07082	0.999122	-1.37663	-2.75327	6.48997e-07
rs55842266	0.0113902	-2.18655	0.999483	-1.39433	0.0113902	-2.18655	0.999483	-1.39433	-2.78866	6.26429e-07
rs10431751	0.00819228	-2.25564	0.999628	-1.4053	0.00819228	-2.25564	0.999628	-1.4053	-2.81059	6.12841e-07
rs531194713	0.115529	1.56699	0.994779	-1.40627	0.115529	1.56699	0.994779	-1.40627	-2.81253	6.11653e-07
rs10431752	0.00820407	-2.25008	0.999627	-1.41711	0.00820407	-2.25008	0.999627	-1.41711	-2.83421	5.98536e-07
rs117190173	0.104217	1.57801	0.995288	-1.43965	0.104217	1.57801	0.995288	-1.43965	-2.8793	5.72147e-07
rs144173464	0.0357501	1.88413	0.998379	-1.44016	0.0357501	1.88413	0.998379	-1.44016	-2.88032	5.71565e-07
rs192195795	0.0473176	-1.80823	0.997855	-1.44101	0.0473176	-1.80823	0.997855	-1.44101	-2.88203	5.70588e-07
rs41307096	0.109584	1.55866	0.995047	-1.44518	0.109584	1.55866	0.995047	-1.44518	-2.89035	5.6586e-07
rs61997109	0.107764	-1.56266	0.995129	-1.44718	0.107764	-1.56266	0.995129	-1.44718	-2.89436	5.63594e-07
rs113335944	0.0696981	1.69113	0.996844	-1.45378	0.0696981	1.69113	0.996844	-1.45378	-2.90755	5.56209e-07
rs72707688	0.0816696	-1.64343	0.996304	-1.45479	0.0816696	-1.64343	0.996304	-1.45479	-2.90959	5.5508e-07
rs185389641	0.0869772	1.61496	0.996065	-1.46996	0.0869772	1.61496	0.996065	-1.46996	-2.93993	5.38491e-07
rs114725345	0.00787784	-2.23349	0.999642	-1.47454	0.00787784	-2.23349	0.999642	-1.47454	-2.94907	5.33588e-07
rs35355408	0.104946	1.54572	0.995255	-1.48642	0.104946	1.54572	0.995255	-1.48642	-2.97284	5.21054e-07
rs144724119	0.0863284	-1.60562	0.996094	-1.48863	0.0863284	-1.60562	0.996094	-1.48863	-2.97726	5.18757e-07
rs141883264	0.0690933	1.66855	0.996871	-1.49589	0.0690933	1.66855	0.996871	-1.49589	-2.99178	5.1128e-07
rs76751100	0.0133615	-2.09919	0.999393	-1.50187	0.0133615	-2.09919	0.999393	-1.50187	-3.00373	5.05205e-07
rs61997118	0.00780613	-2.22198	0.999646	-1.50472	0.00780613	-2.22198	0.999646	-1.50472	-3.00945	5.02325e-07
rs139710396	0.0961924	-1.55815	0.995649	-1.5101	0.0961924	-1.55815	0.995649	-1.5101	-3.02019	4.96957e-07
rs117989825	0.092772	1.56403	0.995804	-1.5188	0.092772	1.56403	0.995804	-1.5188	-3.03759	4.88385e-07
rs72709915	0.0550695	1.71022	0.997505	-1.53789	0.0550695	1.71022	0.997505	-1.53789	-3.07579	4.70083e-07
rs77384212	0.0325063	1.85314	0.998526	-1.54521	0.0325063	1.85314	0.998526	-1.54521	-3.09042	4.63254e-07
rs200111548	0.00966985	-2.15146	0.999561	-1.55206	0.00966985	-2.15146	0.999561	-1.55206	-3.10411	4.56956e-07
rs117803580	0.0751856	1.60489	0.996596	-1.55799	0.0751856	1.60489	0.996596	-1.55799	-3.11599	4.5156e-07
rs12884180	0.0125147	2.08214	0.999432	-1.57013	0.0125147	2.08214	0.999432	-1.57013	-3.14027	4.40729e-07
rs77667449	0.00911357	-2.1565	0.999586	-1.57077	0.00911357	-2.1565	0.999586	-1.57077	-3.14154	4.40168e-07
rs71421895	0.0170929	2.00461	0.999224	-1.5731	0.0170929	2.00461	0.999224	-1.5731	-3.1462	4.3812e-07
rs112456084	0.0408828	-1.77023	0.998146	-1.58134	0.0408828	-1.77023	0.998146	-1.58134	-3.16268	4.30961e-07
rs118095371	0.0734123	1.58352	0.996676	-1.60374	0.0734123	1.58352	0.996676	-1.60374	-3.20748	4.12079e-07
rs7143077	0.0322817	-1.82083	0.998536	-1.60793	0.0322817	-1.82083	0.998536	-1.60793	-3.21585	4.08644e-07
rs112894309	0.0681299	1.59892	0.996915	-1.61623	0.0681299	1.59892	0.996915	-1.61623	-3.23247	4.01911e-07
rs12434726	0.00346501	2.34821	0.999843	-1.62182	0.00346501	2.34821	0.999843	-1.62182	-3.24365	3.97443e-07
rs117830007	0.0183841	-1.95443	0.999166	-1.6361	0.0183841	-1.95443	0.999166	-1.6361	-3.27219	3.86258e-07
rs12879592	0.0217418	1.90921	0.999013	-1.63985	0.0217418	1.90921	0.999013	-1.63985	-3.27971	3.83365e-07
rs74089371	0.063782	1.5987	0.997111	-1.6492	0.063782	1.5987	0.997111	-1.6492	-3.2984	3.76266e-07
rs377198190	0.00941261	-2.10957	0.999573	-1.65471	0.00941261	-2.10957	0.999573	-1.65471	-3.30942	3.72143e-07
rs79132383	0.0488817	-1.67444	0.997784	-1.65736	0.0488817	-1.67444	0.997784	-1.65736	-3.31473	3.70172e-07
rs113352604	0.0438165	-1.70331	0.998014	-1.66297	0.0438165	-1.70331	0.998014	-1.66297	-3.32593	3.66048e-07
rs74089372	0.0635731	1.5806	0.997121	-1.67951	0.0635731	1.5806	0.997121	-1.67951	-3.35902	3.54134e-07
rs4906434	0.00331435	2.332	0.999849	-1.68197	0.00331435	2.332	0.999849	-1.68197	-3.36394	3.52395e-07
rs141632788	0.0681763	1.55543	0.996913	-1.68428	0.0681763	1.55543	0.996913	-1.68428	-3.36856	3.50772e-07
rs61997099	0.00798753	-2.13408	0.999637	-1.68464	0.00798753	-2.13408	0.999637	-1.68464	-3.36929	3.50517e-07
rs144497181	0.0709674	1.52744	0.996787	-1.70744	0.0709674	1.52744	0.996787	-1.70744	-3.41487	3.34897e-07
rs2819425	0.0552588	-1.60286	0.997496	-1.7136	0.0552588	-1.60286	0.997496	-1.7136	-3.42719	3.30797e-07
rs139142357	0.0504474	-1.62752	0.997714	-1.71901	0.0504474	-1.62752	0.997714	-1.71901	-3.43803	3.27233e-07
rs57414669	0.00713248	-2.14114	0.999676	-1.72605	0.00713248	-2.14114	0.999676	-1.72605	-3.45211	3.22657e-07
rs59107644	0.0064788	-2.16319	0.999706	-1.7266	0.0064788	-2.16319	0.999706	-1.7266	-3.45321	3.22302e-07
rs138565216	0.0641847	1.54556	0.997093	-1.7294	0.0641847	1.54556	0.997093	-1.7294	-3.45879	3.20507e-07
rs75232889	0.028983	-1.77556	0.998685	-1.74279	0.028983	-1.77556	0.998685	-1.74279	-3.48557	3.12038e-07
rs7143644	0.016558	-1.9201	0.999248	-1.75465	0.016558	-1.9201	0.999248	-1.75465	-3.5093	3.0472e-07
rs201406401	0.00801995	-2.09069	0.999636	-1.77424	0.00801995	-2.09069	0.999636	-1.77424	-3.54849	2.93011e-07
rs587690096	0.0495236	-1.59585	0.997755	-1.77912	0.0495236	-1.59585	0.997755	-1.77912	-3.55824	2.90168e-07
rs149617324	0.0437006	1.60864	0.998019	-1.82074	0.0437006	1.60864	0.998019	-1.82074	-3.64148	2.66993e-07
rs80083325	0.0156961	-1.89458	0.999288	-1.82994	0.0156961	-1.89458	0.999288	-1.82994	-3.65989	2.62121e-07
rs142127908	0.00551575	-2.14435	0.99975	-1.8475	0.00551575	-2.14435	0.99975	-1.8475	-3.69499	2.5308e-07
rs111206908	0.0285384	-1.70529	0.998705	-1.87262	0.0285384	-1.70529	0.998705	-1.87262	-3.74524	2.40678e-07
rs111206909	0.0285384	-1.70463	0.998705	-1.87374	0.0285384	-1.70463	0.998705	-1.87374	-3.74748	2.4014e-07
rs118177394	0.0180806	-1.83169	0.999179	-1.87655	0.0180806	-1.83169	0.999179	-1.87655	-3.7531	2.38792e-07
rs79696443	0.0180703	-1.82863	0.99918	-1.88243	0.0180703	-1.82863	0.99918	-1.88243	-3.76486	2.36001e-07
rs111298327	0.0410897	-1.58575	0.998137	-1.88782	0.0410897	-1.58575	0.998137	-1.88782	-3.77564	2.33472e-07
rs12882641	0.00548379	2.1255	0.999751	-1.89063	0.00548379	2.1255	0.999751	-1.89063	-3.78126	2.32162e-07
rs536679222	0.0166906	-1.83605	0.999242	-1.90842	0.0166906	-1.83605	0.999242	-1.90842	-3.81683	2.24049e-07
rs538212935	0.0309676	-1.65109	0.998595	-1.92282	0.0309676	-1.65109	0.998595	-1.92282	-3.84565	2.17685e-07
rs77505595	0.0291279	-1.64171	0.998679	-1.96871	0.0291279	-1.64171	0.998679	-1.96871	-3.93742	1.98597e-07
rs10149967	0.00722449	2.02004	0.999672	-1.97155	0.00722449	2.02004	0.999672	-1.97155	-3.94309	1.97474e-07
rs538787068	0.0310334	-1.61554	0.998592	-1.97974	0.0310334	-1.61554	0.998592	-1.97974	-3.95948	1.94263e-07
rs558584145	0.0310334	-1.61554	0.998592	-1.97974	0.0310334	-1.61554	0.998592	-1.97974	-3.95948	1.94263e-07
rs566718726	0.0310334	-1.61554	0.998592	-1.97974	0.0310334	-1.61554	0.998592	-1.97974	-3.95948	1.94263e-07
rs569158886	0.0310334	-1.61554	0.998592	-1.97974	0.0310334	-1.61554	0.998592	-1.97974	-3.95948	1.94263e-07
rs57837762	0.00555969	-2.0766	0.999748	-1.98649	0.00555969	-2.0766	0.999748	-1.98649	-3.97299	1.91658e-07
rs188689698	0.0173589	-1.7737	0.999212	-2.0013	0.0173589	-1.7737	0.999212	-2.0013	-4.00261	1.86064e-07
rs530369664	0.00979298	-1.92779	0.999555	-2.00175	0.00979298	-1.92779	0.999555	-2.00175	-4.00351	1.85896e-07
rs117634561	0.0313563	1.59747	0.998578	-2.00358	0.0313563	1.59747	0.998578	-2.00358	-4.00716	1.85219e-07
rs75421499	0.0324238	1.57008	0.998529	-2.03025	0.0324238	1.57008	0.998529	-2.03025	-4.0605	1.75598e-07
rs61998878	0.0182588	1.74099	0.999171	-2.03355	0.0182588	1.74099	0.999171	-2.03355	-4.0671	1.74442e-07
rs28699424	0.00429962	-2.10991	0.999805	-2.04513	0.00429962	-2.10991	0.999805	-2.04513	-4.09026	1.70449e-07
rs199549720	0.00337713	2.16073	0.999847	-2.05726	0.00337713	2.16073	0.999847	-2.05726	-4.11451	1.66365e-07
rs530312461	0.0318851	-1.54041	0.998554	-2.08466	0.0318851	-1.54041	0.998554	-2.08466	-4.16932	1.57492e-07
rs141775959	0.0111833	1.8235	0.999492	-2.13103	0.0111833	1.8235	0.999492	-2.13103	-4.26207	1.43542e-07
rs10431753	0.00740471	-1.93061	0.999664	-2.13584	0.00740471	-1.93061	0.999664	-2.13584	-4.27167	1.4217e-07
rs149938880	0.0242316	-1.58974	0.9989	-2.1442	0.0242316	-1.58974	0.9989	-2.1442	-4.28839	1.39813e-07
rs117165790	0.0276234	1.53354	0.998747	-2.16662	0.0276234	1.53354	0.998747	-2.16662	-4.33324	1.33681e-07
rs7150715	0.00404407	-2.06271	0.999816	-2.17419	0.00404407	-2.06271	0.999816	-2.17419	-4.34838	1.31672e-07
rs4983522	0.00448203	-2.03344	0.999796	-2.18276	0.00448203	-2.03344	0.999796	-2.18276	-4.36552	1.29435e-07
rs74246318	0.00463426	2.01897	0.99979	-2.1954	0.00463426	2.01897	0.99979	-2.1954	-4.39081	1.26202e-07
rs6576071	0.00404664	-2.04285	0.999816	-2.21464	0.00404664	-2.04285	0.999816	-2.21464	-4.42929	1.21439e-07
rs6576072	0.00404664	-2.04234	0.999816	-2.21567	0.00404664	-2.04234	0.999816	-2.21567	-4.43134	1.21189e-07
rs3924892	0.00404514	-2.04161	0.999816	-2.21736	0.00404514	-2.04161	0.999816	-2.21736	-4.43473	1.2078e-07
rs11851335	0.0163576	-1.62258	0.999258	-2.28734	0.0163576	-1.62258	0.999258	-2.28734	-4.57469	1.05005e-07
rs4075085	0.00403132	-2.00106	0.999817	-2.301	0.00403132	-2.00106	0.999817	-2.301	-4.60201	1.02175e-07
rs10138582	0.00347879	2.02388	0.999842	-2.32874	0.00347879	2.02388	0.999842	-2.32874	-4.65748	9.66616e-08
rs61998765	0.0169593	-1.58399	0.99923	-2.33115	0.0169593	-1.58399	0.99923	-2.33115	-4.6623	9.61967e-08
rs7140257	0.017433	1.55472	0.999209	-2.36332	0.017433	1.55472	0.999209	-2.36332	-4.72663	9.02034e-08
rs558223383	0.0185491	1.53238	0.999158	-2.36683	0.0185491	1.53238	0.999158	-2.36683	-4.73367	8.95708e-08
rs6576041	0.0034774	2.00399	0.999842	-2.369	0.0034774	2.00399	0.999842	-2.369	-4.738	8.91839e-08
rs10144833	0.00404028	-1.96425	0.999817	-2.37287	0.00404028	-1.96425	0.999817	-2.37287	-4.74575	8.84954e-08
rs28375558	0.0034969	1.99984	0.999841	-2.37449	0.0034969	1.99984	0.999841	-2.37449	-4.74899	8.82092e-08
rs11160831	0.00403784	-1.9624	0.999817	-2.3768	0.00403784	-1.9624	0.999817	-2.3768	-4.7536	8.78034e-08
rs11628967	0.00403756	-1.96208	0.999817	-2.37747	0.00403756	-1.96208	0.999817	-2.37747	-4.75494	8.76853e-08
rs4075087	0.00403649	-1.96114	0.999817	-2.37944	0.00403649	-1.96114	0.999817	-2.37944	-4.75888	8.73406e-08
rs7146925	0.00403578	-1.95906	0.999817	-2.3836	0.00403578	-1.95906	0.999817	-2.3836	-4.7672	8.66168e-08
rs6576069	0.00403581	-1.9587	0.999817	-2.38432	0.00403581	-1.9587	0.999817	-2.38432	-4.76864	8.64925e-08
rs10147672	0.00403723	-1.9567	0.999817	-2.38805	0.00403723	-1.9567	0.999817	-2.38805	-4.77611	8.5849e-08
rs12147593	0.016549	-1.55251	0.999249	-2.3927	0.016549	-1.55251	0.999249	-2.3927	-4.78541	8.50543e-08
rs7147054	0.00690242	1.80695	0.999687	-2.40192	0.00690242	1.80695	0.999687	-2.40192	-4.80384	8.35012e-08
rs12884027	0.00627768	1.83147	0.999715	-2.40469	0.00627768	1.83147	0.999715	-2.40469	-4.80939	8.30388e-08
rs4577017	0.0040367	-1.94254	0.999817	-2.41573	0.0040367	-1.94254	0.999817	-2.41573	-4.83145	8.12269e-08
rs4577018	0.0040368	-1.94237	0.999817	-2.41604	0.0040368	-1.94237	0.999817	-2.41604	-4.83207	8.11766e-08
rs4570772	0.00403496	-1.94092	0.999817	-2.41907	0.00403496	-1.94092	0.999817	-2.41907	-4.83814	8.06854e-08
rs7150306	0.00632264	1.81239	0.999713	-2.4359	0.00632264	1.81239	0.999713	-2.4359	-4.87179	7.80153e-08
rs73354011	0.00348428	1.96091	0.999842	-2.4534	0.00348428	1.96091	0.999842	-2.4534	-4.9068	7.53316e-08
rs4900624	0.00330985	1.95984	0.99985	-2.48115	0.00330985	1.95984	0.99985	-2.48115	-4.96231	7.12638e-08
rs539800730	0.00413179	-1.90121	0.999812	-2.4835	0.00413179	-1.90121	0.999812	-2.4835	-4.96699	7.09306e-08
rs35090541	0.00621724	1.78929	0.999718	-2.48587	0.00621724	1.78929	0.999718	-2.48587	-4.97173	7.05955e-08
rs34971388	0.00980981	1.64765	0.999555	-2.50148	0.00980981	1.64765	0.999555	-2.50148	-5.00296	6.84252e-08
rs12586545	0.00331392	1.94659	0.999849	-2.5064	0.00331392	1.94659	0.999849	-2.5064	-5.01281	6.77546e-08
rs62639547	0.0129247	-1.55387	0.999413	-2.5139	0.0129247	-1.55387	0.999413	-2.5139	-5.02779	6.67468e-08
rs144161830	0.0112292	1.59772	0.99949	-2.51502	0.0112292	1.59772	0.99949	-2.51502	-5.03004	6.65971e-08
rs12436635	0.0119986	1.5757	0.999455	-2.51686	0.0119986	1.5757	0.999455	-2.51686	-5.03373	6.63518e-08
rs28674855	0.00502385	-1.81543	0.999772	-2.54522	0.00502385	-1.81543	0.999772	-2.54522	-5.09045	6.2693e-08
rs12586594	0.00331397	1.9203	0.999849	-2.55723	0.00331397	1.9203	0.999849	-2.55723	-5.11446	6.12055e-08
rs12891766	0.00924152	1.62857	0.99958	-2.56252	0.00924152	1.62857	0.99958	-2.56252	-5.12503	6.05618e-08
rs58218156	0.00926245	1.62752	0.999579	-2.5631	0.00926245	1.62752	0.999579	-2.5631	-5.1262	6.04914e-08
rs72713877	0.0119931	1.5391	0.999456	-2.57407	0.0119931	1.5391	0.999456	-2.57407	-5.14813	5.91788e-08
rs12433626	0.00881745	1.63565	0.9996	-2.57441	0.00881745	1.63565	0.9996	-2.57441	-5.14882	5.91381e-08
rs138690995	0.0092513	1.61193	0.99958	-2.58894	0.0092513	1.61193	0.99958	-2.58894	-5.17789	5.74439e-08
rs3784233	0.00792558	1.65635	0.99964	-2.5936	0.00792558	1.65635	0.99964	-2.5936	-5.18719	5.69119e-08
rs4340255	0.00918042	1.6064	0.999583	-2.60168	0.00918042	1.6064	0.999583	-2.60168	-5.20336	5.59992e-08
rs72713838	0.00775391	-1.65792	0.999648	-2.60194	0.00775391	-1.65792	0.999648	-2.60194	-5.20388	5.597e-08
rs12879330	0.00425593	1.82726	0.999807	-2.60654	0.00425593	1.82726	0.999807	-2.60654	-5.21309	5.54572e-08
rs3809458	0.0042608	1.82274	0.999806	-2.61422	0.0042608	1.82274	0.999806	-2.61422	-5.22844	5.4612e-08
rs35980174	0.00918695	1.58707	0.999583	-2.63218	0.00918695	1.58707	0.999583	-2.63218	-5.26435	5.26857e-08
rs4900613	0.00327439	1.88105	0.999851	-2.63782	0.00327439	1.88105	0.999851	-2.63782	-5.27564	5.20943e-08
rs34011356	0.00918603	1.58276	0.999583	-2.63904	0.00918603	1.58276	0.999583	-2.63904	-5.27809	5.19671e-08
rs72707689	0.00790566	1.6289	0.999641	-2.63993	0.00790566	1.6289	0.999641	-2.63993	-5.27985	5.18754e-08
rs8008557	0.00988977	-1.55505	0.999551	-2.64564	0.00988977	-1.55505	0.999551	-2.64564	-5.29129	5.12857e-08
rs2013274	0.00406221	-1.81186	0.999816	-2.65783	0.00406221	-1.81186	0.999816	-2.65783	-5.31566	5.00507e-08
rs12101271	0.00426669	1.79616	0.999806	-2.66162	0.00426669	1.79616	0.999806	-2.66162	-5.32324	4.9673e-08
rs12101275	0.00426625	1.79584	0.999806	-2.66224	0.00426625	1.79584	0.999806	-2.66224	-5.32449	4.96108e-08
rs10143367	0.0091112	1.57049	0.999586	-2.66247	0.0091112	1.57049	0.999586	-2.66247	-5.32495	4.9588e-08
rs55962657	0.00357186	-1.84329	0.999838	-2.66469	0.00357186	-1.84329	0.999838	-2.66469	-5.32937	4.93692e-08
rs11622864	0.00488119	1.75563	0.999778	-2.66636	0.00488119	1.75563	0.999778	-2.66636	-5.33272	4.92039e-08
rs3809459	0.00426733	1.79304	0.999806	-2.66714	0.00426733	1.79304	0.999806	-2.66714	-5.33428	4.91273e-08
rs34536859	0.00920233	1.56346	0.999582	-2.66851	0.00920233	1.56346	0.999582	-2.66851	-5.33702	4.89932e-08
rs199541923	0.00973703	1.54449	0.999558	-2.66977	0.00973703	1.54449	0.999558	-2.66977	-5.33955	4.88693e-08
rs4359375	0.00973703	1.54449	0.999558	-2.66977	0.00973703	1.54449	0.999558	-2.66977	-5.33955	4.88693e-08
rs12101279	0.00426657	1.78874	0.999806	-2.67492	0.00426657	1.78874	0.999806	-2.67492	-5.34984	4.83688e-08
rs143638553	0.00920283	1.55769	0.999582	-2.67749	0.00920283	1.55769	0.999582	-2.67749	-5.35498	4.81209e-08
rs7157265	0.00517695	-1.72925	0.999765	-2.68294	0.00517695	-1.72925	0.999765	-2.68294	-5.36588	4.75994e-08
rs4983517	0.00490951	1.74435	0.999777	-2.68321	0.00490951	1.74435	0.999777	-2.68321	-5.36641	4.75739e-08
rs7142340	0.00518387	-1.72791	0.999765	-2.68458	0.00518387	-1.72791	0.999765	-2.68458	-5.36916	4.74435e-08
rs8008344	0.00912094	1.55463	0.999586	-2.6867	0.00912094	1.55463	0.999586	-2.6867	-5.37341	4.72423e-08
rs8008615	0.00912184	1.554	0.999586	-2.68764	0.00912184	1.554	0.999586	-2.68764	-5.37527	4.71544e-08
rs10147802	0.0051801	-1.72415	0.999765	-2.69143	0.0051801	-1.72415	0.999765	-2.69143	-5.38287	4.67975e-08
rs736066	0.00400117	-1.79632	0.999818	-2.69343	0.00400117	-1.79632	0.999818	-2.69343	-5.38685	4.66113e-08
rs11628179	0.0048543	1.73446	0.99978	-2.70605	0.0048543	1.73446	0.99978	-2.70605	-5.4121	4.54494e-08
rs4492978	0.00912556	1.53925	0.999586	-2.71024	0.00912556	1.53925	0.999586	-2.71024	-5.42048	4.50701e-08
rs77066495	0.00916351	1.53753	0.999584	-2.71081	0.00916351	1.53753	0.999584	-2.71081	-5.42162	4.50189e-08
rs28373763	0.00503582	-1.71939	0.999771	-2.71373	0.00503582	-1.71939	0.999771	-2.71373	-5.42747	4.47561e-08
rs10220575	0.00789816	1.58272	0.999641	-2.71453	0.00789816	1.58272	0.999641	-2.71453	-5.42907	4.46847e-08
rs143949770	0.00534781	1.70007	0.999757	-2.71673	0.00534781	1.70007	0.999757	-2.71673	-5.43346	4.44887e-08
rs533411654	0.00456762	1.74578	0.999793	-2.71678	0.00456762	1.74578	0.999793	-2.71678	-5.43355	4.44847e-08
rs7151958	0.00911949	1.53204	0.999586	-2.72163	0.00911949	1.53204	0.999586	-2.72163	-5.44326	4.40548e-08
rs7144401	0.00909939	1.52755	0.999587	-2.7296	0.00909939	1.52755	0.999587	-2.7296	-5.45921	4.33578e-08
rs4146327	0.00908596	1.52445	0.999587	-2.73507	0.00908596	1.52445	0.999587	-2.73507	-5.47014	4.28865e-08
rs4983523	0.00481153	-1.71879	0.999781	-2.73753	0.00481153	-1.71879	0.999781	-2.73753	-5.47507	4.26757e-08
rs12882886	0.00452987	1.73606	0.999794	-2.73785	0.00452987	1.73606	0.999794	-2.73785	-5.47569	4.26491e-08
rs146449084	0.00627912	-1.63667	0.999715	-2.74229	0.00627912	-1.63667	0.999715	-2.74229	-5.48459	4.22714e-08
rs4243750	0.00452743	1.73302	0.999794	-2.74339	0.00452743	1.73302	0.999794	-2.74339	-5.48677	4.21791e-08
rs2894635	0.00406262	-1.76373	0.999815	-2.74381	0.00406262	-1.76373	0.999815	-2.74381	-5.48762	4.21432e-08
rs28826297	0.0034794	1.80621	0.999842	-2.74543	0.0034794	1.80621	0.999842	-2.74543	-5.49086	4.20072e-08
rs10162501	0.00400369	-1.76325	0.999818	-2.75197	0.00400369	-1.76325	0.999818	-2.75197	-5.50393	4.14614e-08
rs4900628	0.00452644	1.72586	0.999794	-2.75586	0.00452644	1.72586	0.999794	-2.75586	-5.51173	4.11396e-08
rs11160807	0.00455	1.72235	0.999793	-2.75932	0.00455	1.72235	0.999793	-2.75932	-5.51864	4.0856e-08
rs8023038	0.00369217	-1.78141	0.999832	-2.76026	0.00369217	-1.78141	0.999832	-2.76026	-5.52052	4.07793e-08
rs201127689	0.00627673	-1.62554	0.999715	-2.76062	0.00627673	-1.62554	0.999715	-2.76062	-5.52124	4.07499e-08
rs11846175	0.00452625	1.71887	0.999794	-2.76793	0.00452625	1.71887	0.999794	-2.76793	-5.53586	4.01587e-08
rs7153233	0.00452127	1.71614	0.999795	-2.77316	0.00452127	1.71614	0.999795	-2.77316	-5.54632	3.97406e-08
rs35535415	0.00676046	1.58982	0.999693	-2.78096	0.00676046	1.58982	0.999693	-2.78096	-5.56192	3.91257e-08
rs4900626	0.00452072	1.71156	0.999795	-2.78107	0.00452072	1.71156	0.999795	-2.78107	-5.56214	3.91169e-08
rs4906456	0.00452033	1.7115	0.999795	-2.78122	0.00452033	1.7115	0.999795	-2.78122	-5.56243	3.91055e-08
rs7153478	0.00452028	1.7106	0.999795	-2.78276	0.00452028	1.7106	0.999795	-2.78276	-5.56552	3.89852e-08
rs3803317	0.00357356	1.77744	0.999838	-2.78364	0.00357356	1.77744	0.999838	-2.78364	-5.56727	3.89168e-08
rs4356402	0.00466982	-1.69951	0.999788	-2.7854	0.00466982	-1.69951	0.999788	-2.7854	-5.57081	3.87793e-08
rs2582492	0.00388846	1.74962	0.999823	-2.79049	0.00388846	1.74962	0.999823	-2.79049	-5.58098	3.83871e-08
rs73350342	0.00573019	-1.62599	0.99974	-2.80541	0.00573019	-1.62599	0.99974	-2.80541	-5.61081	3.72587e-08
rs151148514	0.00456171	1.69111	0.999793	-2.81135	0.00456171	1.69111	0.999793	-2.81135	-5.62271	3.68181e-08
rs8009494	0.00450769	1.68852	0.999795	-2.82168	0.00450769	1.68852	0.999795	-2.82168	-5.64335	3.60657e-08
rs60754050	0.00463278	1.68035	0.99979	-2.82176	0.00463278	1.68035	0.99979	-2.82176	-5.64353	3.60595e-08
rs10873552	0.00362992	-1.75079	0.999835	-2.82282	0.00362992	-1.75079	0.999835	-2.82282	-5.64564	3.59834e-08
rs4983584	0.00516718	-1.64443	0.999765	-2.82691	0.00516718	-1.64443	0.999765	-2.82691	-5.65383	3.569e-08
rs28470657	0.00641261	1.57459	0.999709	-2.83143	0.00641261	1.57459	0.999709	-2.83143	-5.66287	3.53687e-08
rs12881146	0.00455443	1.67727	0.999793	-2.83545	0.00455443	1.67727	0.999793	-2.83545	-5.6709	3.50857e-08
rs150446570	0.00456921	-1.67413	0.999792	-2.8391	0.00456921	-1.67413	0.999792	-2.8391	-5.6782	3.48306e-08
rs2582497	0.00390363	-1.71603	0.999823	-2.84674	0.00390363	-1.71603	0.999823	-2.84674	-5.69347	3.43027e-08
rs2582577	0.005595	1.59982	0.999746	-2.85953	0.005595	1.59982	0.999746	-2.85953	-5.71906	3.34362e-08
rs2819454	0.00385522	-1.70627	0.999825	-2.86967	0.00385522	-1.70627	0.999825	-2.86967	-5.73935	3.27647e-08
rs28654371	0.00363022	-1.72192	0.999835	-2.8729	0.00363022	-1.72192	0.999835	-2.8729	-5.74579	3.25541e-08
rs7150546	0.00381294	-1.70681	0.999827	-2.87426	0.00381294	-1.70681	0.999827	-2.87426	-5.74851	3.24657e-08
rs4254262	0.0050648	-1.61588	0.99977	-2.88345	0.0050648	-1.61588	0.99977	-2.88345	-5.76689	3.18744e-08
rs12894635	0.00453765	1.64622	0.999794	-2.88888	0.00453765	1.64622	0.999794	-2.88888	-5.77775	3.15302e-08
rs7146879	0.00512374	-1.60853	0.999767	-2.88952	0.00512374	-1.60853	0.999767	-2.88952	-5.77903	3.14899e-08
rs12885406	0.00561223	1.57615	0.999745	-2.89557	0.00561223	1.57615	0.999745	-2.89557	-5.79114	3.1111e-08
rs12590675	0.00328479	1.73719	0.999851	-2.89645	0.00328479	1.73719	0.999851	-2.89645	-5.7929	3.10562e-08
rs9788622	0.00457321	1.63707	0.999792	-2.89999	0.00457321	1.63707	0.999792	-2.89999	-5.79998	3.0837e-08
rs4343210	0.00454459	1.63531	0.999794	-2.90602	0.00454459	1.63531	0.999794	-2.90602	-5.81203	3.04676e-08
rs4074680	0.0045825	1.63184	0.999792	-2.90753	0.0045825	1.63184	0.999792	-2.90753	-5.81507	3.03753e-08
rs4359376	0.00388773	-1.67713	0.999823	-2.91476	0.00388773	-1.67713	0.999823	-2.91476	-5.82952	2.99394e-08
rs61997770	0.00381385	-1.6785	0.999827	-2.92206	0.00381385	-1.6785	0.999827	-2.92206	-5.84411	2.95058e-08
rs4315289	0.00457417	1.60838	0.999792	-2.94644	0.00457417	1.60838	0.999792	-2.94644	-5.89288	2.81014e-08
rs11629189	0.00454369	1.609	0.999794	-2.94878	0.00454369	1.609	0.999794	-2.94878	-5.89755	2.79703e-08
rs7156076	0.00458781	1.598	0.999792	-2.96159	0.00458781	1.598	0.999792	-2.96159	-5.92318	2.72627e-08
rs71129266	0.00561993	1.5324	0.999745	-2.96287	0.00561993	1.5324	0.999745	-2.96287	-5.92574	2.71929e-08
rs2582575	0.00540928	1.54146	0.999754	-2.96803	0.00540928	1.54146	0.999754	-2.96803	-5.93606	2.69137e-08
rs4635277	0.00381351	-1.64722	0.999827	-2.9741	0.00381351	-1.64722	0.999827	-2.9741	-5.94819	2.65891e-08
rs61997771	0.00381583	-1.6462	0.999827	-2.97547	0.00381583	-1.6462	0.999827	-2.97547	-5.95094	2.65162e-08
rs12431580	0.00380643	-1.64104	0.999827	-2.98519	0.00380643	-1.64104	0.999827	-2.98519	-5.97038	2.60056e-08
rs11160832	0.00380421	-1.6361	0.999827	-2.99357	0.00380421	-1.6361	0.999827	-2.99357	-5.98714	2.55735e-08
rs9324080	0.00380656	-1.63591	0.999827	-2.99358	0.00380656	-1.63591	0.999827	-2.99358	-5.98717	2.55728e-08
rs9652309	0.00380814	-1.63502	0.999827	-2.99483	0.00380814	-1.63502	0.999827	-2.99483	-5.98966	2.5509e-08
rs10139182	0.0051163	-1.54189	0.999768	-2.99518	0.0051163	-1.54189	0.999768	-2.99518	-5.99037	2.54912e-08
rs4983588	0.00512961	-1.54076	0.999767	-2.99564	0.00512961	-1.54076	0.999767	-2.99564	-5.99127	2.54681e-08
rs3803294	0.00380344	-1.6339	0.999827	-2.99727	0.00380344	-1.6339	0.999827	-2.99727	-5.99454	2.5385e-08
rs4906451	0.00329634	1.67598	0.99985	-2.99914	0.00329634	1.67598	0.99985	-2.99914	-5.99829	2.529e-08
rs10147484	0.00380315	-1.63216	0.999827	-3.00015	0.00380315	-1.63216	0.999827	-3.00015	-6.00029	2.52393e-08
rs7159100	0.00511673	-1.5378	0.999768	-3.00144	0.00511673	-1.5378	0.999768	-3.00144	-6.00288	2.51742e-08
rs55862960	0.00356106	-1.64996	0.999838	-3.00381	0.00356106	-1.64996	0.999838	-3.00381	-6.00763	2.50549e-08
rs3923888	0.00380344	-1.62654	0.999827	-3.00927	0.00380344	-1.62654	0.999827	-3.00927	-6.01854	2.4783e-08
rs10137166	0.00345999	-1.64629	0.999843	-3.02425	0.00345999	-1.64629	0.999843	-3.02425	-6.04849	2.40517e-08
rs11621410	0.00345858	-1.6415	0.999843	-3.03232	0.00345858	-1.6415	0.999843	-3.03232	-6.06465	2.36662e-08
rs9805957	0.00357931	-1.62962	0.999837	-3.03461	0.00357931	-1.62962	0.999837	-3.03461	-6.06921	2.35584e-08
rs733130	0.00364114	-1.61594	0.999835	-3.04824	0.00364114	-1.61594	0.999835	-3.04824	-6.09649	2.29246e-08
rs8003870	0.00454311	1.53221	0.999794	-3.06943	0.00454311	1.53221	0.999794	-3.06943	-6.13885	2.19736e-08
rs4243748	0.00329282	1.62069	0.99985	-3.09081	0.00329282	1.62069	0.99985	-3.09081	-6.18161	2.10538e-08
rs76939505	0.00362199	-1.58905	0.999835	-3.09396	0.00362199	-1.58905	0.999835	-3.09396	-6.18791	2.09217e-08
rs34527763	0.00355917	1.59426	0.999838	-3.09441	0.00355917	1.59426	0.999838	-3.09441	-6.18882	2.09026e-08
rs79017463	0.00362269	-1.58741	0.999835	-3.09646	0.00362269	-1.58741	0.999835	-3.09646	-6.19293	2.0817e-08
rs72708086	0.00362294	-1.58727	0.999835	-3.09665	0.00362294	-1.58727	0.999835	-3.09665	-6.1933	2.08093e-08
rs12880651	0.00355564	1.59101	0.999839	-3.10009	0.00355564	1.59101	0.999839	-3.10009	-6.20017	2.06667e-08
rs4243747	0.00329302	1.61395	0.99985	-3.10167	0.00329302	1.61395	0.99985	-3.10167	-6.20334	2.06014e-08
rs7155652	0.00371672	1.57532	0.999831	-3.10278	0.00371672	1.57532	0.999831	-3.10278	-6.20556	2.05557e-08
rs67687416	0.00345462	1.58995	0.999843	-3.11617	0.00345462	1.58995	0.999843	-3.11617	-6.23234	2.00125e-08
rs3803316	0.00355022	1.58105	0.999839	-3.11664	0.00355022	1.58105	0.999839	-3.11664	-6.23327	1.99938e-08
rs35960466	0.00357368	1.57594	0.999838	-3.12141	0.00357368	1.57594	0.999838	-3.12141	-6.24282	1.9804e-08
rs28656783	0.0035557	1.57433	0.999839	-3.12647	0.0035557	1.57433	0.999839	-3.12647	-6.25295	1.96043e-08
rs3803315	0.00355364	1.55794	0.999839	-3.15243	0.00355364	1.55794	0.999839	-3.15243	-6.30486	1.86126e-08
rs10134026	0.0033143	1.57717	0.999849	-3.15713	0.0033143	1.57717	0.999849	-3.15713	-6.31426	1.84384e-08
rs55748429	0.00385647	-1.52655	0.999825	-3.15995	0.00385647	-1.52655	0.999825	-3.15995	-6.31991	1.83346e-08
rs11629201	0.00357096	1.54375	0.999838	-3.172	0.00357096	1.54375	0.999838	-3.172	-6.34401	1.7898e-08
rs34086344	0.00330599	-1.5619	0.99985	-3.18236	0.00330599	-1.5619	0.99985	-3.18236	-6.36471	1.75313e-08
rs74206528	0.00363048	-1.53157	0.999835	-3.18246	0.00363048	-1.53157	0.999835	-3.18246	-6.36492	1.75276e-08
rs61171346	0.00348753	1.53962	0.999842	-3.19018	0.00348753	1.53962	0.999842	-3.19018	-6.38036	1.72591e-08
rs2239284	0.00328076	-1.55707	0.999851	-3.19371	0.00328076	-1.55707	0.999851	-3.19371	-6.38742	1.71376e-08
rs11160812	0.00357754	1.52858	0.999838	-3.19439	0.00357754	1.52858	0.999838	-3.19439	-6.38877	1.71145e-08
rs4906438	0.0032732	1.54303	0.999851	-3.21662	0.0032732	1.54303	0.999851	-3.21662	-6.43325	1.637e-08
rs4255721	0.00327055	1.52687	0.999851	-3.24182	0.00327055	1.52687	0.999851	-3.24182	-6.48364	1.55655e-08

## Sheet: ME1
snp	V.df1	z.df1	r.df1	lABF.df1	V.df2	z.df2	r.df2	lABF.df2	internal.sum.lABF	SNP.PP.H4
rs75084625	0.160132	-3.06589	0.992732	2.20353	0.160132	-3.06589	0.992732	2.20353	4.40706	0.226874
rs287838	0.00405616	-3.56408	0.999815	2.05368	0.00405616	-3.56408	0.999815	2.05368	4.10737	0.168125
rs2458533	0.00404541	-3.45758	0.999815	1.67852	0.00404541	-3.45758	0.999815	1.67852	3.35704	0.0793907
rs2999296	0.00405279	-3.43908	0.999815	1.61566	0.00405279	-3.43908	0.999815	1.61566	3.23132	0.0700113
rs4355583	0.00408309	-3.3925	0.999813	1.46031	0.00408309	-3.3925	0.999813	1.46031	2.92063	0.0513141
rs2989874	0.00408357	-3.36106	0.999813	1.3542	0.00408357	-3.36106	0.999813	1.3542	2.7084	0.041502
rs199815318	0.00407172	-3.3323	0.999814	1.25652	0.00407172	-3.3323	0.999814	1.25652	2.51305	0.0341371
rs144281174	0.0904415	-2.78959	0.995882	1.12868	0.0904415	-2.78959	0.995882	1.12868	2.25736	0.0264351
rs138576621	0.266253	2.55186	0.987973	1.00651	0.266253	2.55186	0.987973	1.00651	2.01302	0.0207046
rs7750568	0.00408678	-3.24143	0.999813	0.959757	0.00408678	-3.24143	0.999813	0.959757	1.91951	0.0188564
rs117874878	0.159775	-2.55394	0.992748	0.774419	0.159775	-2.55394	0.992748	0.774419	1.54884	0.013016
rs13218698	0.00676197	-3.0517	0.999691	0.614011	0.00676197	-3.0517	0.999691	0.614011	1.22802	0.00944381
rs553841861	9.67011	1.78699	0.693426	0.516027	9.67011	1.78699	0.693426	0.516027	1.03205	0.00776317
rs6917679	0.0078311	2.97864	0.999642	0.466933	0.0078311	2.97864	0.999642	0.466933	0.933866	0.00703715
rs544103316	37.5634	1.90644	0.368	0.43932	37.5634	1.90644	0.368	0.43932	0.87864	0.00665905
rs547249882	0.241886	2.30111	0.989062	0.36084	0.241886	2.30111	0.989062	0.36084	0.72168	0.00569175
rs112157854	0.246998	2.29118	0.988833	0.348023	0.246998	2.29118	0.988833	0.348023	0.696046	0.0055477
rs13216745	0.00447146	-3.00797	0.999796	0.275285	0.00447146	-3.00797	0.999796	0.275285	0.55057	0.0047966
rs145898014	0.00616695	2.91945	0.999718	0.173359	0.00616695	2.91945	0.999718	0.173359	0.346718	0.00391203
rs79872474	0.0312688	-2.62456	0.998572	0.163348	0.0312688	-2.62456	0.998572	0.163348	0.326697	0.00383448
rs202236574	52.3823	1.49481	0.294559	0.154625	52.3823	1.49481	0.294559	0.154625	0.30925	0.00376816
rs147486294	0.0790999	-2.43471	0.996397	0.140296	0.0790999	-2.43471	0.996397	0.140296	0.280593	0.00366171
rs150369684	0.0905222	2.39502	0.995878	0.110479	0.0905222	2.39502	0.995878	0.110479	0.220959	0.00344973
rs541411659	226.406	1.78411	0.0880962	0.0940974	226.406	1.78411	0.0880962	0.0940974	0.188195	0.00333853
rs140716565	4.30094	1.52571	0.835675	0.0696877	4.30094	1.52571	0.835675	0.0696877	0.139375	0.00317946
rs11760054	0.00617034	2.88283	0.999718	0.0674419	0.00617034	2.88283	0.999718	0.0674419	0.134884	0.00316521
rs202197480	5.82349	1.43658	0.789735	0.0352149	5.82349	1.43658	0.789735	0.0352149	0.0704298	0.00296764
rs200758901	644.896	1.49484	0.0328036	0.0199738	644.896	1.49484	0.0328036	0.0199738	0.0399476	0.00287854
rs147792065	7383.24	1.62433	0.00295369	0.00241755	7383.24	1.62433	0.00295369	0.00241755	0.00483511	0.00277922
rs80247253	0.0258721	-2.58834	0.998819	-0.0246937	0.0258721	-2.58834	0.998819	-0.0246937	-0.0493875	0.00263254
rs555460205	0.286437	2.05438	0.987073	-0.0912763	0.286437	2.05438	0.987073	-0.0912763	-0.182553	0.00230432
rs117023305	0.0304042	-2.53011	0.998612	-0.0935979	0.0304042	-2.53011	0.998612	-0.0935979	-0.187196	0.00229364
rs201794377	0.895436	1.7718	0.960671	-0.109991	0.895436	1.7718	0.960671	-0.109991	-0.219982	0.00221966
rs72910077	0.00618854	2.81782	0.999717	-0.11636	0.00618854	2.81782	0.999717	-0.11636	-0.232721	0.00219157
rs546952948	0.0830339	2.31518	0.996218	-0.118867	0.0830339	2.31518	0.996218	-0.118867	-0.237734	0.00218061
rs145736814	0.153763	2.17693	0.993019	-0.12931	0.153763	2.17693	0.993019	-0.12931	-0.258621	0.00213553
rs12528175	0.0236348	2.56418	0.998921	-0.131706	0.0236348	2.56418	0.998921	-0.131706	-0.263413	0.00212532
rs148032698	0.0827454	2.29677	0.996231	-0.162869	0.0827454	2.29677	0.996231	-0.162869	-0.325739	0.0019969
rs143621229	0.0832738	2.28833	0.996207	-0.179026	0.0832738	2.28833	0.996207	-0.179026	-0.358053	0.00193341
rs184805529	1.30757	1.63302	0.943591	-0.1794	1.30757	1.63302	0.943591	-0.1794	-0.3588	0.00193196
rs149761646	0.0823288	2.28988	0.99625	-0.181074	0.0823288	2.28988	0.99625	-0.181074	-0.362149	0.0019255
rs139013739	0.0823518	2.2885	0.996249	-0.184074	0.0823518	2.2885	0.996249	-0.184074	-0.368148	0.00191399
rs141335790	0.0823558	2.28675	0.996249	-0.188029	0.0823558	2.28675	0.996249	-0.188029	-0.376059	0.00189891
rs138955002	0.0840762	2.27905	0.996171	-0.195449	0.0840762	2.27905	0.996171	-0.195449	-0.390899	0.00187093
rs144790624	0.0833535	2.28066	0.996204	-0.196026	0.0833535	2.28066	0.996204	-0.196026	-0.392052	0.00186878
rs149080459	0.0848586	2.27614	0.996135	-0.19753	0.0848586	2.27614	0.996135	-0.19753	-0.395059	0.00186317
rs7763520	0.0824109	2.28169	0.996246	-0.199233	0.0824109	2.28169	0.996246	-0.199233	-0.398466	0.00185683
rs185971753	0.0822388	2.2805	0.996254	-0.20296	0.0822388	2.2805	0.996254	-0.20296	-0.405921	0.00184304
rs145128980	0.0847311	2.27231	0.996141	-0.206946	0.0847311	2.27231	0.996141	-0.206946	-0.413891	0.00182841
rs147041689	0.0821659	2.27806	0.996257	-0.208917	0.0821659	2.27806	0.996257	-0.208917	-0.417835	0.00182121
rs78745181	0.0819419	2.27835	0.996268	-0.209595	0.0819419	2.27835	0.996268	-0.209595	-0.41919	0.00181875
rs77715481	0.0821103	2.27703	0.99626	-0.211592	0.0821103	2.27703	0.99626	-0.211592	-0.423184	0.0018115
rs6904945	0.0821298	2.27668	0.996259	-0.212263	0.0821298	2.27668	0.996259	-0.212263	-0.424526	0.00180907
rs6911309	0.0821184	2.27589	0.99626	-0.214139	0.0821184	2.27589	0.99626	-0.214139	-0.428279	0.00180229
rs6911501	0.0821184	2.27589	0.99626	-0.214139	0.0821184	2.27589	0.99626	-0.214139	-0.428279	0.00180229
rs79997605	0.0819448	2.27292	0.996267	-0.221889	0.0819448	2.27292	0.996267	-0.221889	-0.443777	0.00177457
rs115526780	0.0819454	2.27236	0.996267	-0.223161	0.0819454	2.27236	0.996267	-0.223161	-0.446321	0.00177006
rs79788932	0.0819179	2.27044	0.996269	-0.227665	0.0819179	2.27044	0.996269	-0.227665	-0.455329	0.00175419
rs115905495	0.0819408	2.26997	0.996268	-0.228585	0.0819408	2.26997	0.996268	-0.228585	-0.457171	0.00175096
rs59807700	0.081931	2.26969	0.996268	-0.229279	0.081931	2.26969	0.996268	-0.229279	-0.458557	0.00174854
rs80196321	0.0819482	2.26946	0.996267	-0.229698	0.0819482	2.26946	0.996267	-0.229698	-0.459397	0.00174707
rs141069562	0.0819345	2.26939	0.996268	-0.229942	0.0819345	2.26939	0.996268	-0.229942	-0.459885	0.00174622
rs57140400	0.0819391	2.26937	0.996268	-0.229956	0.0819391	2.26937	0.996268	-0.229956	-0.459912	0.00174617
rs140981931	0.0819288	2.26923	0.996268	-0.23035	0.0819288	2.26923	0.996268	-0.23035	-0.4607	0.00174479
rs115847610	0.0819488	2.26913	0.996267	-0.230439	0.0819488	2.26913	0.996267	-0.230439	-0.460879	0.00174448
rs145110515	0.0819202	2.26826	0.996269	-0.232581	0.0819202	2.26826	0.996269	-0.232581	-0.465161	0.00173703
rs57569910	0.0819139	2.26803	0.996269	-0.23314	0.0819139	2.26803	0.996269	-0.23314	-0.46628	0.00173509
rs57805455	0.0818755	2.26644	0.996271	-0.236953	0.0818755	2.26644	0.996271	-0.236953	-0.473905	0.00172191
rs7759658	0.0819013	2.26549	0.996269	-0.238945	0.0819013	2.26549	0.996269	-0.238945	-0.477889	0.00171506
rs73749436	0.0819133	2.26452	0.996269	-0.241077	0.0819133	2.26452	0.996269	-0.241077	-0.482154	0.00170776
rs6454302	0.0819059	2.26442	0.996269	-0.241339	0.0819059	2.26442	0.996269	-0.241339	-0.482678	0.00170687
rs6917965	0.0819041	2.26379	0.996269	-0.242769	0.0819041	2.26379	0.996269	-0.242769	-0.485539	0.00170199
rs73749444	0.0820605	2.26329	0.996262	-0.242971	0.0820605	2.26329	0.996262	-0.242971	-0.485943	0.0017013
rs73749441	0.0817205	2.25996	0.996278	-0.252508	0.0817205	2.25996	0.996278	-0.252508	-0.505017	0.00166916
rs76066360	0.0817131	2.25972	0.996278	-0.253077	0.0817131	2.25972	0.996278	-0.253077	-0.506155	0.00166726
rs138618246	0.081764	2.25933	0.996276	-0.253656	0.081764	2.25933	0.996276	-0.253656	-0.507312	0.00166533
rs57294798	0.0817251	2.25887	0.996277	-0.25493	0.0817251	2.25887	0.996277	-0.25493	-0.509861	0.00166109
rs58525915	0.0817142	2.25883	0.996278	-0.255075	0.0817142	2.25883	0.996278	-0.255075	-0.51015	0.00166061
rs59710535	0.0817131	2.25877	0.996278	-0.255219	0.0817131	2.25877	0.996278	-0.255219	-0.510438	0.00166013
rs76840928	0.0817342	2.25867	0.996277	-0.25531	0.0817342	2.25867	0.996277	-0.25531	-0.51062	0.00165983
rs58012193	0.0817102	2.25871	0.996278	-0.255384	0.0817102	2.25871	0.996278	-0.255384	-0.510767	0.00165959
rs140124606	0.0817119	2.25843	0.996278	-0.256001	0.0817119	2.25843	0.996278	-0.256001	-0.512003	0.00165754
rs78297482	0.0818074	2.25757	0.996274	-0.257367	0.0818074	2.25757	0.996274	-0.257367	-0.514733	0.00165302
rs140506028	0.0819648	2.25369	0.996267	-0.265139	0.0819648	2.25369	0.996267	-0.265139	-0.530277	0.00162752
rs58961933	0.0826143	2.25092	0.996237	-0.267505	0.0826143	2.25092	0.996237	-0.267505	-0.535011	0.00161984
rs73749431	0.0836563	2.24774	0.99619	-0.268489	0.0836563	2.24774	0.99619	-0.268489	-0.536978	0.00161665
rs528339226	0.0816159	2.25148	0.996282	-0.27219	0.0816159	2.25148	0.996282	-0.27219	-0.54438	0.00160473
rs143523160	0.0816165	2.24947	0.996282	-0.276694	0.0816165	2.24947	0.996282	-0.276694	-0.553387	0.00159034
rs137916101	0.111445	2.17999	0.994931	-0.278131	0.111445	2.17999	0.994931	-0.278131	-0.556263	0.00158578
rs111491543	0.1255	2.14	0.994295	-0.306457	0.1255	2.14	0.994295	-0.306457	-0.612915	0.00149844
rs7758795	0.00448779	-2.80226	0.999795	-0.320395	0.00448779	-2.80226	0.999795	-0.320395	-0.640791	0.00145724
rs116329197	0.0808401	2.2288	0.996318	-0.32748	0.0808401	2.2288	0.996318	-0.32748	-0.65496	0.00143674
rs115696731	0.0961744	2.18424	0.995622	-0.340583	0.0961744	2.18424	0.995622	-0.340583	-0.681165	0.00139958
rs16876727	0.0821631	2.21002	0.996258	-0.361067	0.0821631	2.21002	0.996258	-0.361067	-0.722135	0.0013434
rs190864107	0.168134	2.00229	0.992372	-0.448646	0.168134	2.00229	0.992372	-0.448646	-0.897293	0.00112755
rs148501913	0.0864766	-2.1471	0.996062	-0.472581	0.0864766	-2.1471	0.996062	-0.472581	-0.945163	0.00107484
rs549205771	0.251447	1.8876	0.988635	-0.477315	0.251447	1.8876	0.988635	-0.477315	-0.95463	0.00106472
rs138338634	0.129337	2.04821	0.994122	-0.482977	0.129337	2.04821	0.994122	-0.482977	-0.965954	0.00105273
rs113234040	0.0799855	2.15519	0.996356	-0.493428	0.0799855	2.15519	0.996356	-0.493428	-0.986856	0.00103095
rs147440264	0.0979734	2.10453	0.995541	-0.501733	0.0979734	2.10453	0.995541	-0.501733	-1.00347	0.00101397
rs143810746	0.0302176	-2.36406	0.99862	-0.502438	0.0302176	-2.36406	0.99862	-0.502438	-1.00488	0.00101254
rs143937372	0.129382	2.03567	0.994119	-0.508271	0.129382	2.03567	0.994119	-0.508271	-1.01654	0.0010008
rs187744330	0.672723	1.59974	0.970161	-0.514571	0.672723	1.59974	0.970161	-0.514571	-1.02914	0.000988264
rs12216198	0.133059	2.02035	0.993953	-0.525568	0.133059	2.02035	0.993953	-0.525568	-1.05114	0.000966767
rs118092561	0.118932	2.03619	0.994592	-0.548112	0.118932	2.03619	0.994592	-0.548112	-1.09622	0.000924143
rs144303120	1.14951	1.40676	0.950069	-0.558473	1.14951	1.40676	0.950069	-0.558473	-1.11695	0.000905191
rs543712579	0.107185	2.05583	0.995123	-0.558751	0.107185	2.05583	0.995123	-0.558751	-1.1175	0.000904687
rs559856369	0.177521	1.91393	0.991949	-0.594174	0.177521	1.91393	0.991949	-0.594174	-1.18835	0.000842811
rs183291108	0.202071	1.87821	0.990846	-0.599087	0.202071	1.87821	0.990846	-0.599087	-1.19817	0.000834571
rs139898541	0.0494885	2.20265	0.997743	-0.626389	0.0494885	2.20265	0.997743	-0.626389	-1.25278	0.000790223
rs529728562	0.193145	1.83842	0.991247	-0.694064	0.193145	1.83842	0.991247	-0.694064	-1.38813	0.000690188
rs3839445	0.0296225	2.27022	0.998647	-0.729436	0.0296225	2.27022	0.998647	-0.729436	-1.45887	0.000643048
rs187689374	0.630141	-1.45093	0.971997	-0.764595	0.630141	-1.45093	0.971997	-0.764595	-1.52919	0.000599384
rs533342002	0.132064	1.88539	0.993998	-0.791172	0.132064	1.88539	0.993998	-0.791172	-1.58234	0.000568357
rs79697203	0.0218268	2.30835	0.999003	-0.793841	0.0218268	2.30835	0.999003	-0.793841	-1.58768	0.000565331
rs150678784	0.106164	1.93874	0.99517	-0.796145	0.106164	1.93874	0.99517	-0.796145	-1.59229	0.000562731
rs72907625	0.150037	-1.82605	0.993187	-0.838588	0.150037	-1.82605	0.993187	-0.838588	-1.67718	0.000516934
rs72907624	0.147079	-1.82841	0.99332	-0.843987	0.147079	-1.82841	0.99332	-0.843987	-1.68797	0.000511382
rs138257511	0.105619	1.89775	0.995194	-0.876897	0.105619	1.89775	0.995194	-0.876897	-1.75379	0.000478807
rs10806254	0.119624	-1.86204	0.994561	-0.88288	0.119624	-1.86204	0.994561	-0.88288	-1.76576	0.000473112
rs117793073	0.0973053	1.90311	0.995571	-0.906898	0.0973053	1.90311	0.995571	-0.906898	-1.8138	0.000450923
rs6920513	0.127851	1.82844	0.994189	-0.912096	0.127851	1.82844	0.994189	-0.912096	-1.82419	0.000446259
rs1757826	0.00389753	-2.60169	0.999822	-0.932617	0.00389753	-2.60169	0.999822	-0.932617	-1.86523	0.000428315
rs76874470	0.0837767	-1.92242	0.996184	-0.943533	0.0837767	-1.92242	0.996184	-0.943533	-1.88707	0.000419065
rs148567330	0.132854	1.79692	0.993963	-0.950176	0.132854	1.79692	0.993963	-0.950176	-1.90035	0.000413534
rs191081982	0.141185	1.766	0.993586	-0.975287	0.141185	1.766	0.993586	-0.975287	-1.95057	0.000393278
rs145130993	0.120213	-1.80478	0.994534	-0.984891	0.120213	-1.80478	0.994534	-0.984891	-1.96978	0.000385797
rs13198278	0.00441152	-2.53615	0.999798	-1.03911	0.00441152	-2.53615	0.999798	-1.03911	-2.07823	0.000346148
rs148070817	0.152924	-1.698	0.993057	-1.05341	0.152924	-1.698	0.993057	-1.05341	-2.10682	0.000336389
rs75617017	0.18536	-1.61219	0.991597	-1.10089	0.18536	-1.61219	0.991597	-1.10089	-2.20179	0.000305914
rs73475797	0.021614	2.17065	0.999013	-1.10679	0.021614	2.17065	0.999013	-1.10679	-2.21357	0.000302331
rs141868269	0.145336	1.67228	0.993399	-1.12124	0.145336	1.67228	0.993399	-1.12124	-2.24249	0.000293714
rs139577291	0.144867	1.66809	0.99342	-1.12977	0.144867	1.66809	0.99342	-1.12977	-2.25954	0.000288746
rs180941361	0.082876	1.82429	0.996225	-1.13197	0.082876	1.82429	0.996225	-1.13197	-2.26395	0.000287477
rs1813511	0.0131683	2.2694	0.999398	-1.13434	0.0131683	2.2694	0.999398	-1.13434	-2.26867	0.000286122
rs79986508	0.00848687	2.3579	0.999612	-1.14865	0.00848687	2.3579	0.999612	-1.14865	-2.29729	0.000278049
rs72907968	0.108253	-1.73922	0.995075	-1.15173	0.108253	-1.73922	0.995075	-1.15173	-2.30347	0.000276338
rs189642098	0.126831	1.69102	0.994235	-1.15642	0.126831	1.69102	0.994235	-1.15642	-2.31284	0.000273761
rs77314398	0.00845445	2.35365	0.999614	-1.16056	0.00845445	2.35365	0.999614	-1.16056	-2.32113	0.000271501
rs142815058	0.139022	1.65822	0.993684	-1.16618	0.139022	1.65822	0.993684	-1.16618	-2.33236	0.000268467
rs12527873	0.00845151	2.34972	0.999614	-1.16998	0.00845151	2.34972	0.999614	-1.16998	-2.33995	0.000266437
rs566523909	0.075647	1.82535	0.996553	-1.17496	0.075647	1.82535	0.996553	-1.17496	-2.34993	0.000263793
rs13208108	0.00436826	-2.48373	0.9998	-1.17555	0.00436826	-2.48373	0.9998	-1.17555	-2.35111	0.000263482
rs12527911	0.00843986	2.34386	0.999614	-1.18443	0.00843986	2.34386	0.999614	-1.18443	-2.36886	0.000258846
rs182024278	0.0507277	1.91708	0.997686	-1.20108	0.0507277	1.91708	0.997686	-1.20108	-2.40215	0.00025037
rs78366486	0.0441172	1.93734	0.997987	-1.23121	0.0441172	1.93734	0.997987	-1.23121	-2.46243	0.000235724
rs141496285	0.0985715	1.71915	0.995514	-1.23224	0.0985715	1.71915	0.995514	-1.23224	-2.46448	0.000235242
rs142183146	0.0820381	1.76959	0.996263	-1.23489	0.0820381	1.76959	0.996263	-1.23489	-2.46978	0.000233997
rs536739	0.00339681	-2.50094	0.999845	-1.2583	0.00339681	-2.50094	0.999845	-1.2583	-2.51659	0.000223296
rs369341434	0.118534	1.64619	0.99461	-1.26392	0.118534	1.64619	0.99461	-1.26392	-2.52783	0.0002208
rs117024745	0.0983105	1.70111	0.995525	-1.26426	0.0983105	1.70111	0.995525	-1.26426	-2.52852	0.000220648
rs13192200	0.0182761	2.13529	0.999165	-1.26628	0.0182761	2.13529	0.999165	-1.26628	-2.53256	0.00021976
rs190754698	0.124774	-1.62921	0.994328	-1.26645	0.124774	-1.62921	0.994328	-1.26645	-2.5329	0.000219685
rs190877460	0.048998	1.88454	0.997765	-1.27995	0.048998	1.88454	0.997765	-1.27995	-2.55989	0.000213834
rs13197685	0.00440538	-2.43409	0.999799	-1.29337	0.00440538	-2.43409	0.999799	-1.29337	-2.58674	0.000208168
rs72903514	0.171353	-1.50949	0.992227	-1.2981	0.171353	-1.50949	0.992227	-1.2981	-2.59621	0.000206208
rs11970642	0.00438761	-2.43068	0.999799	-1.30368	0.00438761	-2.43068	0.999799	-1.30368	-2.60736	0.00020392
rs72910087	0.0151079	2.15894	0.99931	-1.31033	0.0151079	2.15894	0.99931	-1.31033	-2.62065	0.000201229
rs61762813	0.0429364	1.89756	0.998041	-1.32077	0.0429364	1.89756	0.998041	-1.32077	-2.64155	0.000197067
rs775684289	0.178215	1.47762	0.991918	-1.3262	0.178215	1.47762	0.991918	-1.3262	-2.6524	0.00019494
rs555454204	0.0910265	1.68077	0.995856	-1.33635	0.0910265	1.68077	0.995856	-1.33635	-2.6727	0.000191023
rs191503666	0.167576	-1.48828	0.992397	-1.34052	0.167576	-1.48828	0.992397	-1.34052	-2.68105	0.000189434
rs141376146	0.0820238	1.70864	0.996264	-1.34058	0.0820238	1.70864	0.996264	-1.34058	-2.68116	0.000189413
rs115271826	0.0961862	1.65865	0.995622	-1.34601	0.0961862	1.65865	0.995622	-1.34601	-2.69202	0.000187368
rs117742161	0.0492214	1.84435	0.997755	-1.35246	0.0492214	1.84435	0.997755	-1.35246	-2.70492	0.000184966
rs148646637	0.0151612	2.13722	0.999307	-1.35519	0.0151612	2.13722	0.999307	-1.35519	-2.71039	0.000183958
rs141545757	0.142686	1.52527	0.993519	-1.36373	0.142686	1.52527	0.993519	-1.36373	-2.72746	0.000180843
rs138869272	0.0971775	1.64278	0.995577	-1.36704	0.0971775	1.64278	0.995577	-1.36704	-2.73408	0.00017965
rs540172850	0.168384	1.45413	0.99236	-1.38804	0.168384	1.45413	0.99236	-1.38804	-2.77607	0.000172262
rs41271569	0.0567178	-1.78563	0.997414	-1.38863	0.0567178	-1.78563	0.997414	-1.38863	-2.77726	0.000172057
rs1355826	0.0110378	2.19468	0.999496	-1.38899	0.0110378	2.19468	0.999496	-1.38899	-2.77798	0.000171934
rs72912122	0.0110559	2.19197	0.999495	-1.39411	0.0110559	2.19197	0.999495	-1.39411	-2.78822	0.000170183
rs117698428	0.129699	-1.53068	0.994105	-1.40226	0.129699	-1.53068	0.994105	-1.40226	-2.80451	0.000167432
rs138882663	0.151971	1.47448	0.9931	-1.40856	0.151971	1.47448	0.9931	-1.40856	-2.81712	0.000165334
rs78200874	0.0695002	-1.71056	0.996833	-1.41904	0.0695002	-1.71056	0.996833	-1.41904	-2.83808	0.000161906
rs79166403	0.0347248	1.90116	0.998415	-1.41921	0.0347248	1.90116	0.998415	-1.41921	-2.83842	0.00016185
rs76253472	0.0959017	1.6113	0.995635	-1.42454	0.0959017	1.6113	0.995635	-1.42454	-2.84907	0.000160136
rs111523055	0.096025	1.60778	0.995629	-1.42955	0.096025	1.60778	0.995629	-1.42955	-2.8591	0.000158538
rs142913091	0.132706	1.49445	0.993969	-1.44548	0.132706	1.49445	0.993969	-1.44548	-2.89097	0.000153565
rs79673182	0.0960343	1.59395	0.995629	-1.45154	0.0960343	1.59395	0.995629	-1.45154	-2.90307	0.000151718
rs116998406	0.0408561	-1.83934	0.998136	-1.45396	0.0408561	-1.83934	0.998136	-1.45396	-2.90793	0.000150983
rs1040544	0.00336363	2.41582	0.999846	-1.47241	0.00336363	2.41582	0.999846	-1.47241	-2.94481	0.000145515
rs144024659	0.158789	1.40979	0.992793	-1.47973	0.158789	1.40979	0.992793	-1.47973	-2.95946	0.0001434
rs77489357	0.0902564	-1.58836	0.99589	-1.49096	0.0902564	-1.58836	0.99589	-1.49096	-2.98192	0.000140215
rs76803574	0.0898836	-1.58888	0.995907	-1.49217	0.0898836	-1.58888	0.995907	-1.49217	-2.98434	0.000139875
rs75378445	0.0207202	1.99354	0.999054	-1.49619	0.0207202	1.99354	0.999054	-1.49619	-2.99238	0.000138755
rs114925356	0.0902924	-1.57657	0.995889	-1.50934	0.0902924	-1.57657	0.995889	-1.50934	-3.01868	0.000135154
rs113248948	0.0294648	1.89665	0.998655	-1.50935	0.0294648	1.89665	0.998655	-1.50935	-3.0187	0.00013515
rs181506201	0.0922853	-1.56646	0.995798	-1.51441	0.0922853	-1.56646	0.995798	-1.51441	-3.02883	0.000133789
rs149711703	0.143514	-1.41407	0.993481	-1.52326	0.143514	-1.41407	0.993481	-1.52326	-3.04652	0.000131442
rs143417330	0.0642126	-1.67171	0.997073	-1.52364	0.0642126	-1.67171	0.997073	-1.52364	-3.04729	0.000131342
rs116924747	0.0412074	-1.79185	0.99812	-1.53578	0.0412074	-1.79185	0.99812	-1.53578	-3.07156	0.000128192
rs188013233	0.0643246	-1.66145	0.997068	-1.53983	0.0643246	-1.66145	0.997068	-1.53983	-3.07966	0.000127158
rs149255830	0.108603	1.49713	0.995059	-1.53996	0.108603	1.49713	0.995059	-1.53996	-3.07991	0.000127126
rs13207655	0.00711347	-2.2211	0.999675	-1.54981	0.00711347	-2.2211	0.999675	-1.54981	-3.09962	0.000124646
rs16873943	0.0913351	-1.54584	0.995842	-1.55146	0.0913351	-1.54584	0.995842	-1.55146	-3.10292	0.000124235
rs183968232	0.126101	1.43028	0.994268	-1.56384	0.126101	1.43028	0.994268	-1.56384	-3.12768	0.000121197
rs7767621	0.134398	-1.4052	0.993893	-1.56788	0.134398	-1.4052	0.993893	-1.56788	-3.13577	0.00012022
rs538160262	0.0871389	1.54996	0.996032	-1.5683	0.0871389	1.54996	0.996032	-1.5683	-3.1366	0.00012012
rs148517163	0.0447957	1.74962	0.997956	-1.569	0.0447957	1.74962	0.997956	-1.569	-3.138	0.000119952
rs149083620	0.0840727	1.55845	0.996171	-1.57283	0.0840727	1.55845	0.996171	-1.57283	-3.14566	0.000119037
rs116742969	0.0919739	-1.52693	0.995813	-1.57696	0.0919739	-1.52693	0.995813	-1.57696	-3.15392	0.000118057
rs77746745	0.0928732	-1.51836	0.995772	-1.58516	0.0928732	-1.51836	0.995772	-1.58516	-3.17032	0.000116137
rs16873938	0.0930268	-1.51695	0.995765	-1.58647	0.0930268	-1.51695	0.995765	-1.58647	-3.17295	0.000115832
rs144942926	0.0923054	-1.51629	0.995798	-1.59131	0.0923054	-1.51629	0.995798	-1.59131	-3.18263	0.000114717
rs138818045	0.0445459	1.73807	0.997968	-1.59187	0.0445459	1.73807	0.997968	-1.59187	-3.18374	0.000114589
rs199669831	0.0260351	1.88497	0.998811	-1.59291	0.0260351	1.88497	0.998811	-1.59291	-3.18582	0.000114351
rs80001352	0.0922932	-1.51431	0.995798	-1.59436	0.0922932	-1.51431	0.995798	-1.59436	-3.18872	0.000114019
rs116046396	0.0921523	-1.5146	0.995804	-1.59468	0.0921523	-1.5146	0.995804	-1.59468	-3.18936	0.000113946
rs111692792	0.0927854	1.51228	0.995776	-1.59479	0.0927854	1.51228	0.995776	-1.59479	-3.18958	0.000113921
rs116686611	0.0923273	-1.51382	0.995797	-1.59492	0.0923273	-1.51382	0.995797	-1.59492	-3.18984	0.000113892
rs186279766	0.0923181	-1.51332	0.995797	-1.59571	0.0923181	-1.51332	0.995797	-1.59571	-3.19143	0.000113712
rs149113397	0.110458	1.45285	0.994975	-1.59661	0.110458	1.45285	0.994975	-1.59661	-3.19321	0.000113509
rs145730899	0.0933345	-1.50884	0.995751	-1.59706	0.0933345	-1.50884	0.995751	-1.59706	-3.19412	0.000113406
rs34145876	0.0151005	2.02068	0.99931	-1.59931	0.0151005	2.02068	0.99931	-1.59931	-3.19862	0.000112896
rs147794778	0.103333	1.47299	0.995298	-1.60012	0.103333	1.47299	0.995298	-1.60012	-3.20025	0.000112713
rs137914747	0.109134	-1.45448	0.995035	-1.60019	0.109134	-1.45448	0.995035	-1.60019	-3.20037	0.000112699
rs118026639	0.0780169	1.56392	0.996446	-1.60123	0.0780169	1.56392	0.996446	-1.60123	-3.20247	0.000112463
rs76737453	0.093315	-1.50413	0.995752	-1.60423	0.093315	-1.50413	0.995752	-1.60423	-3.20846	0.000111791
rs76560166	0.093307	-1.5026	0.995752	-1.60656	0.093307	-1.5026	0.995752	-1.60656	-3.21313	0.000111271
rs182205454	0.0687415	-1.59923	0.996867	-1.60812	0.0687415	-1.59923	0.996867	-1.60812	-3.21624	0.000110925
rs144549853	0.0932612	-1.50007	0.995754	-1.61058	0.0932612	-1.50007	0.995754	-1.61058	-3.22116	0.00011038
rs188505435	0.047796	1.70495	0.99782	-1.61385	0.047796	1.70495	0.99782	-1.61385	-3.22771	0.00010966
rs116871961	0.0693564	-1.59197	0.996839	-1.61526	0.0693564	-1.59197	0.996839	-1.61526	-3.23053	0.000109351
rs377758065	0.0951507	-1.48421	0.995669	-1.62426	0.0951507	-1.48421	0.995669	-1.62426	-3.24852	0.000107401
rs200831952	0.0450692	-1.71345	0.997944	-1.62849	0.0450692	-1.71345	0.997944	-1.62849	-3.25698	0.000106496
rs191532950	0.0937719	-1.48543	0.995731	-1.62966	0.0937719	-1.48543	0.995731	-1.62966	-3.25931	0.000106248
rs111321118	0.0440349	1.71121	0.997991	-1.64383	0.0440349	1.71121	0.997991	-1.64383	-3.28765	0.00010328
rs13199345	0.0071128	-2.17459	0.999675	-1.65206	0.0071128	-2.17459	0.999675	-1.65206	-3.30412	0.000101593
rs142053771	0.0320628	1.79525	0.998536	-1.65426	0.0320628	1.79525	0.998536	-1.65426	-3.30853	0.000101146
rs531646910	0.0866249	1.48273	0.996055	-1.67276	0.0866249	1.48273	0.996055	-1.67276	-3.34553	9.7472e-05
rs1538357	0.0200984	-1.88877	0.999082	-1.71454	0.0200984	-1.88877	0.999082	-1.71454	-3.42908	8.96589e-05
rs16883694	0.0804329	1.47757	0.996336	-1.717	0.0804329	1.47757	0.996336	-1.717	-3.43401	8.92184e-05
rs140888622	0.0437098	1.67	0.998006	-1.71703	0.0437098	1.67	0.998006	-1.71703	-3.43407	8.92126e-05
rs55778629	0.0802527	1.46574	0.996344	-1.73547	0.0802527	1.46574	0.996344	-1.73547	-3.47093	8.59838e-05
rs73751521	0.0796572	1.46519	0.996371	-1.73995	0.0796572	1.46519	0.996371	-1.73995	-3.4799	8.52166e-05
rs12212757	0.0152066	1.94564	0.999305	-1.74454	0.0152066	1.94564	0.999305	-1.74454	-3.48908	8.44375e-05
rs73751519	0.0795669	1.45638	0.996375	-1.75333	0.0795669	1.45638	0.996375	-1.75333	-3.50667	8.29655e-05
rs147859409	0.085427	1.43095	0.996109	-1.75478	0.085427	1.43095	0.996109	-1.75478	-3.50955	8.27266e-05
rs9449610	0.0438052	1.64146	0.998001	-1.76311	0.0438052	1.64146	0.998001	-1.76311	-3.52622	8.13593e-05
rs9294273	0.043804	1.64125	0.998001	-1.76348	0.043804	1.64125	0.998001	-1.76348	-3.52695	8.12996e-05
rs117365635	0.0546049	-1.57045	0.99751	-1.76758	0.0546049	-1.57045	0.99751	-1.76758	-3.53517	8.06345e-05
rs9444045	0.0120752	1.99135	0.999448	-1.76954	0.0120752	1.99135	0.999448	-1.76954	-3.53908	8.03197e-05
rs9444046	0.0120752	1.99085	0.999448	-1.77055	0.0120752	1.99085	0.999448	-1.77055	-3.54111	8.0157e-05
rs55834591	0.0792158	1.44375	0.996391	-1.77376	0.0792158	1.44375	0.996391	-1.77376	-3.54752	7.96448e-05
rs12213544	0.0435816	1.63529	0.998011	-1.77574	0.0435816	1.63529	0.998011	-1.77574	-3.55147	7.93303e-05
rs35606488	0.00425816	-2.23364	0.999805	-1.77809	0.00425816	-2.23364	0.999805	-1.77809	-3.55618	7.89577e-05
rs10046370	0.0437115	1.63173	0.998006	-1.78007	0.0437115	1.63173	0.998006	-1.78007	-3.56014	7.86454e-05
rs565280853	0.0442122	1.62362	0.997983	-1.78759	0.0442122	1.62362	0.997983	-1.78759	-3.57517	7.74724e-05
rs13219666	0.00425832	-2.22887	0.999805	-1.78869	0.00425832	-2.22887	0.999805	-1.78869	-3.57739	7.7301e-05
rs9444068	0.0434919	1.62706	0.998016	-1.79016	0.0434919	1.62706	0.998016	-1.79016	-3.58031	7.70749e-05
rs9444065	0.0435098	1.62344	0.998015	-1.79583	0.0435098	1.62344	0.998015	-1.79583	-3.59166	7.62052e-05
rs62421760	0.00427758	-2.22209	0.999804	-1.80153	0.00427758	-2.22209	0.999804	-1.80153	-3.60306	7.53418e-05
rs217324	0.0692806	1.46867	0.996843	-1.8039	0.0692806	1.46867	0.996843	-1.8039	-3.6078	7.4985e-05
rs144186341	0.0729837	-1.44702	0.996674	-1.80958	0.0729837	-1.44702	0.996674	-1.80958	-3.61916	7.41384e-05
rs113105647	0.0446718	1.60337	0.997962	-1.81507	0.0446718	1.60337	0.997962	-1.81507	-3.63013	7.33294e-05
rs117584658	0.0301623	1.71548	0.998623	-1.82447	0.0301623	1.71548	0.998623	-1.82447	-3.64894	7.19632e-05
rs572075871	0.015489	1.89548	0.999292	-1.83163	0.015489	1.89548	0.999292	-1.83163	-3.66325	7.09404e-05
rs1778814	0.0705614	-1.43655	0.996784	-1.84134	0.0705614	-1.43655	0.996784	-1.84134	-3.68268	6.95752e-05
rs118131306	0.0429459	1.59552	0.99804	-1.84714	0.0429459	1.59552	0.99804	-1.84714	-3.69429	6.87724e-05
rs117956901	0.0704972	-1.42409	0.996787	-1.85956	0.0704972	-1.42409	0.996787	-1.85956	-3.71911	6.70862e-05
rs1180244	0.00425039	-2.19043	0.999806	-1.87456	0.00425039	-2.19043	0.999806	-1.87456	-3.74912	6.51032e-05
rs12525063	0.0106748	1.96813	0.999512	-1.87697	0.0106748	1.96813	0.999512	-1.87697	-3.75394	6.47898e-05
rs72897670	0.00921663	2.00381	0.999579	-1.87942	0.00921663	2.00381	0.999579	-1.87942	-3.75884	6.44731e-05
rs41271563	0.0394658	-1.59843	0.998199	-1.88448	0.0394658	-1.59843	0.998199	-1.88448	-3.76896	6.38243e-05
rs146277683	0.0462839	1.54245	0.997888	-1.89309	0.0462839	1.54245	0.997888	-1.89309	-3.78619	6.27341e-05
rs142394924	0.00936087	1.99127	0.999572	-1.8967	0.00936087	1.99127	0.999572	-1.8967	-3.79339	6.22837e-05
rs376794221	0.00582355	-2.1002	0.999734	-1.91083	0.00582355	-2.1002	0.999734	-1.91083	-3.82166	6.05475e-05
rs2038242	0.0434047	1.54466	0.998019	-1.92158	0.0434047	1.54466	0.998019	-1.92158	-3.84315	5.92604e-05
rs112567504	0.0431946	1.54572	0.998029	-1.92235	0.0431946	1.54572	0.998029	-1.92235	-3.84471	5.91683e-05
rs146252140	0.0245377	1.7158	0.998879	-1.92662	0.0245377	1.7158	0.998879	-1.92662	-3.85323	5.86659e-05
rs191038128	0.0116709	1.91352	0.999467	-1.93841	0.0116709	1.91352	0.999467	-1.93841	-3.87682	5.72982e-05
rs72897659	0.00907986	1.96906	0.999585	-1.95588	0.00907986	1.96906	0.999585	-1.95588	-3.91176	5.53307e-05
rs147895735	0.00907315	1.96773	0.999585	-1.95887	0.00907315	1.96773	0.999585	-1.95887	-3.91774	5.50013e-05
rs61704170	0.00907967	1.96722	0.999585	-1.95951	0.00907967	1.96722	0.999585	-1.95951	-3.91901	5.49311e-05
rs7745513	0.00907853	1.96559	0.999585	-1.96277	0.00907853	1.96559	0.999585	-1.96277	-3.92554	5.45736e-05
rs6915334	0.00939938	-1.95388	0.99957	-1.96839	0.00939938	-1.95388	0.99957	-1.96839	-3.93678	5.39639e-05
rs145240851	0.0210082	-1.7361	0.99904	-1.96894	0.0210082	-1.7361	0.99904	-1.96894	-3.93787	5.39048e-05
rs6932099	0.0093005	-1.953	0.999575	-1.97537	0.0093005	-1.953	0.999575	-1.97537	-3.95073	5.32161e-05
rs7764458	0.00930349	-1.95283	0.999575	-1.97556	0.00930349	-1.95283	0.999575	-1.97556	-3.95111	5.31959e-05
rs112159808	0.0431123	1.50979	0.998033	-1.97807	0.0431123	1.50979	0.998033	-1.97807	-3.95615	5.29286e-05
rs72897672	0.00907062	1.95402	0.999585	-1.98588	0.00907062	1.95402	0.999585	-1.98588	-3.97176	5.21086e-05
rs9294270	0.00932105	-1.9446	0.999574	-1.99063	0.00932105	-1.9446	0.999574	-1.99063	-3.98126	5.16163e-05
rs2182232	0.00932099	-1.94427	0.999574	-1.99128	0.00932099	-1.94427	0.999574	-1.99128	-3.98257	5.15486e-05
rs6921760	0.00933278	-1.9432	0.999573	-1.99274	0.00933278	-1.9432	0.999573	-1.99274	-3.98547	5.1399e-05
rs147781324	0.014896	1.8098	0.999319	-2.00972	0.014896	1.8098	0.999319	-2.00972	-4.01943	4.96828e-05
rs16877892	0.0225396	1.69019	0.998971	-2.01246	0.0225396	1.69019	0.998971	-2.01246	-4.02493	4.94107e-05
rs73749784	0.0460751	1.46272	0.997898	-2.01488	0.0460751	1.46272	0.997898	-2.01488	-4.02975	4.91728e-05
rs73749789	0.0460261	1.46128	0.9979	-2.01751	0.0460261	1.46128	0.9979	-2.01751	-4.03503	4.89141e-05
rs12200510	0.0254084	1.64652	0.99884	-2.02559	0.0254084	1.64652	0.99884	-2.02559	-4.05119	4.813e-05
rs3798894	0.0460145	1.4558	0.997901	-2.02561	0.0460145	1.4558	0.997901	-2.02561	-4.05123	4.81279e-05
rs6934537	0.00805318	-1.96365	0.999632	-2.02639	0.00805318	-1.96365	0.999632	-2.02639	-4.05278	4.80534e-05
rs11414946	0.00813617	-1.95558	0.999628	-2.03707	0.00813617	-1.95558	0.999628	-2.03707	-4.07415	4.70374e-05
rs3798893	0.0459682	1.44273	0.997903	-2.04501	0.0459682	1.44273	0.997903	-2.04501	-4.09003	4.62964e-05
rs9449605	0.0459099	1.43984	0.997905	-2.0498	0.0459099	1.43984	0.997905	-2.0498	-4.0996	4.58555e-05
rs9344334	0.00813931	-1.94768	0.999628	-2.0523	0.00813931	-1.94768	0.999628	-2.0523	-4.1046	4.56266e-05
rs2300465	0.0146299	1.78386	0.999332	-2.06528	0.0146299	1.78386	0.999332	-2.06528	-4.13055	4.44577e-05
rs113571257	0.0363505	1.50697	0.998341	-2.06713	0.0363505	1.50697	0.998341	-2.06713	-4.13426	4.42934e-05
rs9444054	0.0147817	1.7742	0.999325	-2.07731	0.0147817	1.7742	0.999325	-2.07731	-4.15461	4.34008e-05
rs117107959	0.0313244	1.54689	0.99857	-2.08029	0.0313244	1.54689	0.99857	-2.08029	-4.16058	4.31429e-05
rs73749768	0.0147849	1.77238	0.999324	-2.08042	0.0147849	1.77238	0.999324	-2.08042	-4.16084	4.31313e-05
rs201301926	0.0455707	1.41743	0.997921	-2.08544	0.0455707	1.41743	0.997921	-2.08544	-4.17088	4.27006e-05
rs111802679	0.0147834	1.769	0.999325	-2.08644	0.0147834	1.769	0.999325	-2.08644	-4.17289	4.2615e-05
rs73749765	0.0147824	1.7686	0.999325	-2.08719	0.0147824	1.7686	0.999325	-2.08719	-4.17437	4.25516e-05
rs16882420	0.014781	1.76795	0.999325	-2.08839	0.014781	1.76795	0.999325	-2.08839	-4.17678	4.24493e-05
rs9449596	0.014781	1.76776	0.999325	-2.08872	0.014781	1.76776	0.999325	-2.08872	-4.17745	4.2421e-05
rs151202525	0.00812964	-1.92874	0.999628	-2.08959	0.00812964	-1.92874	0.999628	-2.08959	-4.17917	4.23478e-05
rs60675658	0.0147798	1.76653	0.999325	-2.09095	0.0147798	1.76653	0.999325	-2.09095	-4.18189	4.22328e-05
rs1936819	0.0147793	1.76607	0.999325	-2.09177	0.0147793	1.76607	0.999325	-2.09177	-4.18354	4.21635e-05
rs145164780	0.040195	1.45581	0.998166	-2.0928	0.040195	1.45581	0.998166	-2.0928	-4.18559	4.20769e-05
rs117220109	0.0403102	1.45408	0.99816	-2.09388	0.0403102	1.45408	0.99816	-2.09388	-4.18776	4.19856e-05
rs9444048	0.0147688	1.76112	0.999325	-2.10084	0.0147688	1.76112	0.999325	-2.10084	-4.20168	4.14056e-05
rs117759737	0.0401958	1.44141	0.998166	-2.11361	0.0401958	1.44141	0.998166	-2.11361	-4.22721	4.03616e-05
rs56038316	0.027653	1.56225	0.998737	-2.11849	0.027653	1.56225	0.998737	-2.11849	-4.23698	3.99694e-05
rs80307190	0.0255866	1.56437	0.998832	-2.15385	0.0255866	1.56437	0.998832	-2.15385	-4.3077	3.72404e-05
rs117276865	0.0110656	1.80306	0.999494	-2.17014	0.0110656	1.80306	0.999494	-2.17014	-4.34028	3.60467e-05
rs146270954	0.0322242	1.46216	0.998529	-2.19349	0.0322242	1.46216	0.998529	-2.19349	-4.38698	3.44019e-05
rs151301413	0.0364256	-1.41005	0.998337	-2.20721	0.0364256	-1.41005	0.998337	-2.20721	-4.41442	3.34707e-05
rs1016615	0.0137473	1.72002	0.999372	-2.20807	0.0137473	1.72002	0.999372	-2.20807	-4.41614	3.34131e-05
rs1016614	0.0137471	1.72	0.999372	-2.20811	0.0137471	1.72	0.999372	-2.20811	-4.41623	3.34103e-05
rs143630065	0.0174237	1.63828	0.999204	-2.22706	0.0174237	1.63828	0.999204	-2.22706	-4.45413	3.21678e-05
rs2482401	0.00914355	-1.81349	0.999582	-2.2465	0.00914355	-1.81349	0.999582	-2.2465	-4.49299	3.09416e-05
rs113101574	0.0170389	1.62689	0.999222	-2.25677	0.0170389	1.62689	0.999222	-2.25677	-4.51355	3.0312e-05
rs1936821	0.013719	1.68967	0.999373	-2.26081	0.013719	1.68967	0.999373	-2.26081	-4.52162	3.00682e-05
rs9362006	0.0100046	-1.78049	0.999543	-2.26085	0.0100046	-1.78049	0.999543	-2.26085	-4.5217	3.0066e-05
rs74501732	0.00868855	1.81122	0.999603	-2.27608	0.00868855	1.81122	0.999603	-2.27608	-4.55216	2.91638e-05
rs1980511	0.0137929	1.64908	0.99937	-2.32585	0.0137929	1.64908	0.99937	-2.32585	-4.65171	2.64006e-05
rs9449590	0.0148484	1.61397	0.999322	-2.34631	0.0148484	1.61397	0.999322	-2.34631	-4.69263	2.5342e-05
rs200301062	0.00337584	-2.01556	0.999846	-2.35732	0.00337584	-2.01556	0.999846	-2.35732	-4.71464	2.47903e-05
rs2324227	0.0137936	1.62985	0.99937	-2.35734	0.0137936	1.62985	0.99937	-2.35734	-4.71468	2.47892e-05
rs1180229	0.00381464	-1.98484	0.999826	-2.35771	0.00381464	-1.98484	0.999826	-2.35771	-4.71542	2.47709e-05
rs2324225	0.0137971	1.62912	0.99937	-2.3584	0.0137971	1.62912	0.99937	-2.3584	-4.7168	2.47369e-05
rs2989872	0.00336683	-2.01534	0.999846	-2.35909	0.00336683	-2.01534	0.999846	-2.35909	-4.71818	2.47026e-05
rs2324226	0.0137936	1.62863	0.99937	-2.35932	0.0137936	1.62863	0.99937	-2.35932	-4.71865	2.46912e-05
rs2670564	0.00337239	-2.01375	0.999846	-2.36148	0.00337239	-2.01375	0.999846	-2.36148	-4.72295	2.4585e-05
rs2943033	0.00336905	-2.01385	0.999846	-2.36177	0.00336905	-2.01385	0.999846	-2.36177	-4.72353	2.45709e-05
rs2324228	0.0137933	1.62709	0.99937	-2.36183	0.0137933	1.62709	0.99937	-2.36183	-4.72366	2.45677e-05
rs1016613	0.0137898	1.6261	0.99937	-2.36357	0.0137898	1.6261	0.99937	-2.36357	-4.72714	2.44822e-05
rs1981129	0.00605642	1.86071	0.999723	-2.36543	0.00605642	1.86071	0.999723	-2.36543	-4.73086	2.43915e-05
rs1180241	0.00382006	-1.97503	0.999825	-2.37641	0.00382006	-1.97503	0.999825	-2.37641	-4.75282	2.38616e-05
rs12530243	0.00605388	1.85377	0.999723	-2.37852	0.00605388	1.85377	0.999723	-2.37852	-4.75703	2.37613e-05
rs1886706	0.0240132	1.41859	0.998903	-2.40265	0.0240132	1.41859	0.998903	-2.40265	-4.80529	2.26418e-05
rs9449600	0.0170982	1.53087	0.999219	-2.40654	0.0170982	1.53087	0.999219	-2.40654	-4.81307	2.24664e-05
rs9353110	0.00347013	1.97531	0.999841	-2.42386	0.00347013	1.97531	0.999841	-2.42386	-4.84773	2.17011e-05
rs2458542	0.00331902	-1.98535	0.999848	-2.42622	0.00331902	-1.98535	0.999848	-2.42622	-4.85243	2.15992e-05
rs138606590	0.0192033	-1.47225	0.999123	-2.43657	0.0192033	-1.47225	0.999123	-2.43657	-4.87315	2.11565e-05
rs60981986	0.00332691	-1.97899	0.999848	-2.43764	0.00332691	-1.97899	0.999848	-2.43764	-4.87528	2.11114e-05
rs287840	0.00332361	-1.97824	0.999848	-2.43962	0.00332361	-1.97824	0.999848	-2.43962	-4.87925	2.10278e-05
rs45480197	0.0216443	1.42883	0.999011	-2.43985	0.0216443	1.42883	0.999011	-2.43985	-4.8797	2.10183e-05
rs287839	0.00332375	-1.97733	0.999848	-2.4414	0.00332375	-1.97733	0.999848	-2.4414	-4.8828	2.09532e-05
rs4472321	0.0033219	-1.97736	0.999848	-2.44162	0.0033219	-1.97736	0.999848	-2.44162	-4.88323	2.09442e-05
rs544767641	0.0170686	1.50737	0.99922	-2.44307	0.0170686	1.50737	0.99922	-2.44307	-4.88613	2.08835e-05
rs12195720	0.00840997	-1.72134	0.999616	-2.45104	0.00840997	-1.72134	0.999616	-2.45104	-4.90208	2.05532e-05
rs28520401	0.0167964	1.5043	0.999233	-2.4557	0.0167964	1.5043	0.999233	-2.4557	-4.9114	2.03625e-05
rs13217062	0.0064528	-1.79237	0.999705	-2.45856	0.0064528	-1.79237	0.999705	-2.45856	-4.91711	2.02465e-05
rs1616571	0.00334787	-1.96352	0.999847	-2.46499	0.00334787	-1.96352	0.999847	-2.46499	-4.92998	1.99877e-05
rs1708636	0.00334972	-1.96162	0.999847	-2.46846	0.00334972	-1.96162	0.999847	-2.46846	-4.93691	1.98495e-05
rs2943031	0.00335335	-1.9604	0.999847	-2.4703	0.00335335	-1.9604	0.999847	-2.4703	-4.9406	1.97765e-05
rs139921730	0.00332374	-1.96242	0.999848	-2.47078	0.00332374	-1.96242	0.999848	-2.47078	-4.94155	1.97577e-05
rs201319695	0.00332378	-1.96227	0.999848	-2.47106	0.00332378	-1.96227	0.999848	-2.47106	-4.94212	1.97463e-05
rs147684878	0.00332368	-1.96181	0.999848	-2.47198	0.00332368	-1.96181	0.999848	-2.47198	-4.94395	1.97103e-05
rs9294260	0.00331204	1.96221	0.999849	-2.47293	0.00331204	1.96221	0.999849	-2.47293	-4.94587	1.96725e-05
rs2482398	0.00331154	-1.95873	0.999849	-2.47984	0.00331154	-1.95873	0.999849	-2.47984	-4.95968	1.94027e-05
rs72899610	0.016305	1.4958	0.999255	-2.48325	0.016305	1.4958	0.999255	-2.48325	-4.96651	1.92707e-05
rs287834	0.00331105	-1.95689	0.999849	-2.48351	0.00331105	-1.95689	0.999849	-2.48351	-4.96701	1.92609e-05
rs287836	0.00336159	-1.95229	0.999846	-2.48494	0.00336159	-1.95229	0.999846	-2.48494	-4.96988	1.92057e-05
rs72897642	0.0118998	1.58395	0.999456	-2.50473	0.0118998	1.58395	0.999456	-2.50473	-5.00947	1.84604e-05
rs55984544	0.0119	1.58379	0.999456	-2.50498	0.0119	1.58379	0.999456	-2.50498	-5.00996	1.84513e-05
rs9444056	0.0167656	1.45107	0.999234	-2.53522	0.0167656	1.45107	0.999234	-2.53522	-5.07044	1.73684e-05
rs199558761	0.00908855	1.64722	0.999585	-2.53709	0.00908855	1.64722	0.999585	-2.53709	-5.07417	1.73037e-05
rs55791162	0.0165182	1.45289	0.999245	-2.53999	0.0165182	1.45289	0.999245	-2.53999	-5.07997	1.72036e-05
rs2179848	0.0171113	1.4365	0.999218	-2.54605	0.0171113	1.4365	0.999218	-2.54605	-5.0921	1.69963e-05
rs1180198	0.00382138	-1.88332	0.999825	-2.55313	0.00382138	-1.88332	0.999825	-2.55313	-5.10625	1.67574e-05
rs907842	0.00329772	-1.92164	0.999849	-2.55387	0.00329772	-1.92164	0.999849	-2.55387	-5.10774	1.67325e-05
rs907843	0.00329769	-1.92073	0.999849	-2.55563	0.00329769	-1.92073	0.999849	-2.55563	-5.11125	1.66738e-05
rs928380	0.00329798	-1.91788	0.999849	-2.56106	0.00329798	-1.91788	0.999849	-2.56106	-5.12211	1.64937e-05
rs4706976	0.00608239	1.75092	0.999722	-2.56149	0.00608239	1.75092	0.999722	-2.56149	-5.12298	1.64794e-05
rs2253003	0.00329806	-1.91746	0.999849	-2.56186	0.00329806	-1.91746	0.999849	-2.56186	-5.12372	1.64673e-05
rs1757850	0.00329834	-1.91741	0.999849	-2.56191	0.00329834	-1.91741	0.999849	-2.56191	-5.12381	1.64657e-05
rs1614804	0.00329834	-1.91716	0.999849	-2.56237	0.00329834	-1.91716	0.999849	-2.56237	-5.12475	1.64503e-05
rs1757848	0.00329829	-1.91697	0.999849	-2.56275	0.00329829	-1.91697	0.999849	-2.56275	-5.1255	1.64379e-05
rs12212188	0.00543924	-1.77727	0.999751	-2.57084	0.00543924	-1.77727	0.999751	-2.57084	-5.14168	1.61742e-05
rs1757847	0.00330173	-1.91193	0.999849	-2.57187	0.00330173	-1.91193	0.999849	-2.57187	-5.14375	1.61407e-05
rs2482397	0.00330092	-1.91128	0.999849	-2.57324	0.00330092	-1.91128	0.999849	-2.57324	-5.14649	1.60966e-05
rs33963029	0.00332654	1.90751	0.999848	-2.57658	0.00332654	1.90751	0.999848	-2.57658	-5.15315	1.59896e-05
rs2179847	0.0170841	1.41353	0.99922	-2.57955	0.0170841	1.41353	0.99922	-2.57955	-5.1591	1.58947e-05
rs1180233	0.00384264	-1.86122	0.999824	-2.59174	0.00384264	-1.86122	0.999824	-2.59174	-5.18348	1.5512e-05
rs2670565	0.0033076	-1.89909	0.999849	-2.59545	0.0033076	-1.89909	0.999849	-2.59545	-5.19091	1.53972e-05
rs35883204	0.00333543	1.89588	0.999848	-2.59736	0.00333543	1.89588	0.999848	-2.59736	-5.19473	1.53385e-05
rs13209128	0.006444	-1.70073	0.999705	-2.61925	0.006444	-1.70073	0.999705	-2.61925	-5.23851	1.46815e-05
rs287837	0.0033103	-1.88598	0.999849	-2.61986	0.0033103	-1.88598	0.999849	-2.61986	-5.23973	1.46636e-05
rs1932222	0.00343635	1.85746	0.999843	-2.65456	0.00343635	1.85746	0.999843	-2.65456	-5.30911	1.36806e-05
rs9341953	0.00343543	1.84979	0.999843	-2.6689	0.00343543	1.84979	0.999843	-2.6689	-5.3378	1.32937e-05
rs7766489	0.00651068	-1.66498	0.999702	-2.67426	0.00651068	-1.66498	0.999702	-2.67426	-5.34851	1.31521e-05
rs1180193	0.0131855	1.43767	0.999398	-2.67441	0.0131855	1.43767	0.999398	-2.67441	-5.34881	1.31481e-05
rs199563721	0.00714081	-1.62583	0.999674	-2.69251	0.00714081	-1.62583	0.999674	-2.69251	-5.38502	1.26806e-05
rs75322508	0.0118764	1.44988	0.999457	-2.70898	0.0118764	1.44988	0.999457	-2.70898	-5.41797	1.22696e-05
rs9344327	0.0071807	-1.6124	0.999672	-2.71147	0.0071807	-1.6124	0.999672	-2.71147	-5.42294	1.22088e-05
rs6454301	0.00344163	1.82242	0.999843	-2.71825	0.00344163	1.82242	0.999843	-2.71825	-5.4365	1.20443e-05
rs62430475	0.00777324	-1.58206	0.999645	-2.72031	0.00777324	-1.58206	0.999645	-2.72031	-5.44062	1.19948e-05
rs6454306	0.00344195	1.81964	0.999843	-2.72326	0.00344195	1.81964	0.999843	-2.72326	-5.44652	1.19242e-05
rs6454304	0.00344436	1.81935	0.999843	-2.72345	0.00344436	1.81935	0.999843	-2.72345	-5.4469	1.19197e-05
rs9344307	0.00578083	1.66661	0.999736	-2.73093	0.00578083	1.66661	0.999736	-2.73093	-5.46186	1.17427e-05
rs58235329	0.00522148	1.6945	0.999761	-2.7349	0.00522148	1.6945	0.999761	-2.7349	-5.4698	1.16498e-05
rs13191028	0.00503563	-1.70419	0.99977	-2.73654	0.00503563	-1.70419	0.99977	-2.73654	-5.47308	1.16117e-05
rs9359547	0.00344469	1.80827	0.999843	-2.74349	0.00344469	1.80827	0.999843	-2.74349	-5.48698	1.14514e-05
rs12210147	0.00780765	-1.55563	0.999643	-2.75955	0.00780765	-1.55563	0.999643	-2.75955	-5.51911	1.10893e-05
rs9344320	0.00343908	1.79816	0.999843	-2.76252	0.00343908	1.79816	0.999843	-2.76252	-5.52505	1.10237e-05
rs5877832	0.00720064	-1.57105	0.999671	-2.77588	0.00720064	-1.57105	0.999671	-2.77588	-5.55175	1.07332e-05
rs9344304	0.00574725	1.63907	0.999737	-2.77934	0.00574725	1.63907	0.999737	-2.77934	-5.55867	1.06592e-05
rs1145909	0.00696904	-1.57702	0.999681	-2.78281	0.00696904	-1.57702	0.999681	-2.78281	-5.56562	1.05854e-05
rs1738631	0.0102192	-1.43945	0.999533	-2.79907	0.0102192	-1.43945	0.999533	-2.79907	-5.59813	1.02467e-05
rs2770674	0.00716828	-1.54216	0.999672	-2.82308	0.00716828	-1.54216	0.999672	-2.82308	-5.64617	9.76619e-06
rs2480092	0.00716911	-1.54166	0.999672	-2.8238	0.00716911	-1.54166	0.999672	-2.8238	-5.6476	9.75219e-06
rs3118925	0.00715229	-1.53442	0.999673	-2.8361	0.00715229	-1.53442	0.999673	-2.8361	-5.67219	9.5153e-06
rs11751753	0.00715102	-1.53287	0.999673	-2.83857	0.00715102	-1.53287	0.999673	-2.83857	-5.67714	9.46837e-06
rs80045706	0.00717394	-1.52599	0.999672	-2.84749	0.00717394	-1.52599	0.999672	-2.84749	-5.69497	9.30099e-06
rs1180207	0.00375502	-1.71526	0.999828	-2.86422	0.00375502	-1.71526	0.999828	-2.86422	-5.72845	8.99476e-06
rs983087	0.00375552	-1.71412	0.999828	-2.86612	0.00375552	-1.71412	0.999828	-2.86612	-5.73223	8.96078e-06
rs1016242	0.00375483	-1.71254	0.999828	-2.8689	0.00375483	-1.71254	0.999828	-2.8689	-5.73781	8.91099e-06
rs1180201	0.00375346	-1.71114	0.999828	-2.87148	0.00375346	-1.71114	0.999828	-2.87148	-5.74297	8.86512e-06
rs3120807	0.00716483	-1.50923	0.999673	-2.87355	0.00716483	-1.50923	0.999673	-2.87355	-5.7471	8.82854e-06
rs3120808	0.00716462	-1.50804	0.999673	-2.87535	0.00716462	-1.50804	0.999673	-2.87535	-5.7507	8.79682e-06
rs3120806	0.00714869	-1.50822	0.999673	-2.87619	0.00714869	-1.50822	0.999673	-2.87619	-5.75239	8.78199e-06
rs1180184	0.00386093	-1.68954	0.999824	-2.8941	0.00386093	-1.68954	0.999824	-2.8941	-5.7882	8.47304e-06
rs1750057	0.00420224	1.65145	0.999808	-2.91539	0.00420224	1.65145	0.999808	-2.91539	-5.83078	8.11987e-06
rs293495	0.00646379	-1.48731	0.999705	-2.95782	0.00646379	-1.48731	0.999705	-2.95782	-5.91563	7.45928e-06
rs9361981	0.00597741	-1.51255	0.999727	-2.95904	0.00597741	-1.51255	0.999727	-2.95904	-5.91808	7.44107e-06
rs140747831	0.00538339	-1.54319	0.999754	-2.96454	0.00538339	-1.54319	0.999754	-2.96454	-5.92907	7.35971e-06
rs3118924	0.00715413	-1.44226	0.999673	-2.9731	0.00715413	-1.44226	0.999673	-2.9731	-5.9462	7.23475e-06
rs553094	0.00385575	1.63813	0.999824	-2.9803	0.00385575	1.63813	0.999824	-2.9803	-5.9606	7.13126e-06
rs13196858	0.00377118	-1.64433	0.999828	-2.98121	0.00377118	-1.64433	0.999828	-2.98121	-5.96242	7.11833e-06
rs9361982	0.00595814	-1.48862	0.999728	-2.99656	0.00595814	-1.48862	0.999728	-2.99656	-5.99311	6.90317e-06
rs293486	0.00712782	-1.41723	0.999674	-3.0107	0.00712782	-1.41723	0.999674	-3.0107	-6.0214	6.71061e-06
rs293485	0.00712741	-1.40862	0.999674	-3.0229	0.00712741	-1.40862	0.999674	-3.0229	-6.04581	6.54883e-06
rs159044	0.00554328	1.48881	0.999747	-3.03232	0.00554328	1.48881	0.999747	-3.03232	-6.06464	6.42664e-06
rs9449582	0.00417069	1.57927	0.999809	-3.03573	0.00417069	1.57927	0.999809	-3.03573	-6.07146	6.38299e-06
rs7741177	0.00417036	-1.56988	0.999809	-3.05056	0.00417036	-1.56988	0.999809	-3.05056	-6.10112	6.19639e-06
rs7774938	0.00417036	-1.56988	0.999809	-3.05056	0.00417036	-1.56988	0.999809	-3.05056	-6.10112	6.19639e-06
rs2148012	0.00417038	-1.5697	0.999809	-3.05083	0.00417038	-1.5697	0.999809	-3.05083	-6.10167	6.19302e-06
rs6934208	0.00417036	-1.56954	0.999809	-3.0511	0.00417036	-1.56954	0.999809	-3.0511	-6.10219	6.18977e-06
rs6906567	0.0041699	-1.56485	0.999809	-3.05849	0.0041699	-1.56485	0.999809	-3.05849	-6.11698	6.0989e-06
rs9344339	0.00416998	-1.56378	0.999809	-3.06015	0.00416998	-1.56378	0.999809	-3.06015	-6.1203	6.07868e-06
rs12193023	0.00417018	-1.56331	0.999809	-3.06086	0.00417018	-1.56331	0.999809	-3.06086	-6.12173	6.07004e-06
rs7773604	0.00417009	-1.5633	0.999809	-3.0609	0.00417009	-1.5633	0.999809	-3.0609	-6.12179	6.06964e-06
rs1925783	0.00416969	-1.56135	0.999809	-3.064	0.00416969	-1.56135	0.999809	-3.064	-6.12799	6.03213e-06
rs112887546	0.00539013	-1.46563	0.999754	-3.08056	0.00539013	-1.46563	0.999754	-3.08056	-6.16111	5.83562e-06
rs10943924	0.00417911	-1.52954	0.999809	-3.11201	0.00417911	-1.52954	0.999809	-3.11201	-6.22402	5.47981e-06
rs12193391	0.00491947	-1.47194	0.999775	-3.11695	0.00491947	-1.47194	0.999775	-3.11695	-6.2339	5.42597e-06
rs12193392	0.00491947	-1.47194	0.999775	-3.11695	0.00491947	-1.47194	0.999775	-3.11695	-6.2339	5.42597e-06
rs647231	0.00418306	1.52098	0.999809	-3.1246	0.00418306	1.52098	0.999809	-3.1246	-6.2492	5.34358e-06
rs11967191	0.00417518	-1.51111	0.999809	-3.1405	0.00417518	-1.51111	0.999809	-3.1405	-6.281	5.17633e-06
rs9359557	0.00417602	-1.50839	0.999809	-3.1445	0.00417602	-1.50839	0.999809	-3.1445	-6.289	5.13506e-06
rs9353119	0.00417652	-1.5074	0.999809	-3.14593	0.00417652	-1.5074	0.999809	-3.14593	-6.29186	5.1204e-06
rs9344335	0.00417664	-1.50705	0.999809	-3.14644	0.00417664	-1.50705	0.999809	-3.14644	-6.29289	5.11513e-06
rs9361989	0.0041766	-1.50683	0.999809	-3.14678	0.0041766	-1.50683	0.999809	-3.14678	-6.29357	5.11167e-06
rs9344338	0.00417675	-1.50623	0.999809	-3.14766	0.00417675	-1.50623	0.999809	-3.14766	-6.29533	5.10266e-06
rs9449579	0.00417933	1.50601	0.999809	-3.1477	0.00417933	1.50601	0.999809	-3.1477	-6.2954	5.10232e-06
rs4706979	0.00417621	-1.50545	0.999809	-3.14891	0.00417621	-1.50545	0.999809	-3.14891	-6.29781	5.09002e-06
rs2307912	0.004174	1.50136	0.999809	-3.15532	0.004174	1.50136	0.999809	-3.15532	-6.31064	5.02515e-06
rs491454	0.00417956	1.49986	0.999809	-3.15691	0.00417956	1.49986	0.999809	-3.15691	-6.31382	5.0092e-06
rs1738638	0.00373119	-1.52742	0.999829	-3.1719	0.00373119	-1.52742	0.999829	-3.1719	-6.34381	4.8612e-06
rs7766560	0.00418126	-1.4873	0.999809	-3.17546	0.00418126	-1.4873	0.999809	-3.17546	-6.35092	4.82676e-06
rs1925787	0.00418085	-1.48549	0.999809	-3.1782	0.00418085	-1.48549	0.999809	-3.1782	-6.35641	4.80032e-06
rs6928591	0.00418375	-1.48472	0.999809	-3.17899	0.00418375	-1.48472	0.999809	-3.17899	-6.35798	4.79279e-06
rs1180183	0.00380632	-1.51269	0.999826	-3.18432	0.00380632	-1.51269	0.999826	-3.18432	-6.36865	4.74192e-06
rs683792	0.0041867	1.47758	0.999809	-3.18921	0.0041867	1.47758	0.999809	-3.18921	-6.37842	4.6958e-06
rs542948	0.00418675	1.47721	0.999809	-3.18976	0.00418675	1.47721	0.999809	-3.18976	-6.37951	4.69069e-06
rs481325	0.00418832	1.47468	0.999809	-3.19331	0.00418832	1.47468	0.999809	-3.19331	-6.38662	4.65749e-06
rs159055	0.00454047	1.44493	0.999792	-3.19639	0.00454047	1.44493	0.999792	-3.19639	-6.39278	4.62888e-06
rs7764503	0.00368938	1.51429	0.999831	-3.1975	0.00368938	1.51429	0.999831	-3.1975	-6.395	4.61861e-06
rs521811	0.00418337	1.46831	0.999809	-3.20326	0.00418337	1.46831	0.999809	-3.20326	-6.40653	4.56566e-06
rs77383726	0.0041868	1.46657	0.999809	-3.20541	0.0041868	1.46657	0.999809	-3.20541	-6.41081	4.54615e-06
rs2307911	0.0041872	1.46614	0.999809	-3.20599	0.0041872	1.46614	0.999809	-3.20599	-6.41199	4.54081e-06
rs159054	0.00453556	1.42882	0.999793	-3.22007	0.00453556	1.42882	0.999793	-3.22007	-6.44014	4.41476e-06
rs159050	0.00453465	1.42666	0.999793	-3.22326	0.00453465	1.42666	0.999793	-3.22326	-6.44652	4.3867e-06
rs159051	0.00453466	1.4257	0.999793	-3.22462	0.00453466	1.4257	0.999793	-3.22462	-6.44924	4.37475e-06
rs623879	0.00441215	1.42703	0.999798	-3.23641	0.00441215	1.42703	0.999798	-3.23641	-6.47281	4.27284e-06
rs209409	0.00379525	1.47867	0.999827	-3.23665	0.00379525	1.47867	0.999827	-3.23665	-6.47331	4.27074e-06
rs529401288	0.00383364	1.4711	0.999825	-3.24279	0.00383364	1.4711	0.999825	-3.24279	-6.48559	4.21861e-06
rs688683	0.00440484	1.41854	0.999799	-3.24932	0.00440484	1.41854	0.999799	-3.24932	-6.49863	4.16392e-06
rs9353121	0.00440491	-1.41377	0.999799	-3.25605	0.00440491	-1.41377	0.999799	-3.25605	-6.51211	4.1082e-06
rs2148011	0.00440466	-1.41354	0.999799	-3.25641	0.00440466	-1.41354	0.999799	-3.25641	-6.51282	4.10525e-06
rs1925782	0.00440478	-1.41236	0.999799	-3.25806	0.00440478	-1.41236	0.999799	-3.25806	-6.51613	4.09173e-06
rs209408	0.0037967	1.46346	0.999826	-3.25883	0.0037967	1.46346	0.999826	-3.25883	-6.51766	4.08544e-06
rs681512	0.00440295	1.41167	0.999799	-3.25925	0.00440295	1.41167	0.999799	-3.25925	-6.5185	4.08201e-06
rs583679	0.00440276	1.41167	0.999799	-3.25927	0.00440276	1.41167	0.999799	-3.25927	-6.51855	4.08183e-06
rs651997	0.00440326	1.4107	0.999799	-3.26058	0.00440326	1.4107	0.999799	-3.26058	-6.52115	4.07121e-06
rs7758347	0.00440333	-1.40984	0.999799	-3.26178	0.00440333	-1.40984	0.999799	-3.26178	-6.52357	4.06139e-06
rs521406	0.00419711	1.42613	0.999808	-3.26265	0.00419711	1.42613	0.999808	-3.26265	-6.52531	4.05432e-06
rs495944	0.00440056	1.40868	0.999799	-3.26373	0.00440056	1.40868	0.999799	-3.26373	-6.52746	4.04562e-06
rs2148010	0.00440352	-1.40627	0.999799	-3.26679	0.00440352	-1.40627	0.999799	-3.26679	-6.53359	4.02089e-06
rs2094116	0.00440324	-1.40564	0.999799	-3.26771	0.00440324	-1.40564	0.999799	-3.26771	-6.53542	4.01353e-06
rs482899	0.00440429	1.40474	0.999799	-3.26886	0.00440429	1.40474	0.999799	-3.26886	-6.53771	4.00434e-06
rs71820880	0.00440163	1.40428	0.999799	-3.26981	0.00440163	1.40428	0.999799	-3.26981	-6.53961	3.99674e-06
rs9350977	0.00440285	-1.40404	0.999799	-3.27	0.00440285	-1.40404	0.999799	-3.27	-6.54	3.99518e-06
rs4317381	0.00440275	-1.40367	0.999799	-3.27054	0.00440275	-1.40367	0.999799	-3.27054	-6.54107	3.99091e-06
rs9444035	0.00440297	-1.40347	0.999799	-3.27079	0.00440297	-1.40347	0.999799	-3.27079	-6.54157	3.98892e-06
rs13208065	0.00353999	1.43776	0.999838	-3.3311	0.00353999	1.43776	0.999838	-3.3311	-6.6622	3.53562e-06
